# Supplementary material for: Rh-catalyzed asymmetric hydrogenation of α- and β-enamido phosphonates: highly enantioselective access to amino phosphonic acids
Source: Royal Society of Chemistry journal article supplement (doi:10.1039/d2ob01419j), 2022-01-01

*Supporting Information*

**Rh-Catalyzed Asymmetric Hydrogenation of  $\alpha$ - and  $\beta$ -Enamido  
Phosphonates: Highly Enantioselective Access to Amino Phosphonic Acids**

Hong-Quan Du<sup>a,b\*</sup>

<sup>a</sup>Dalian Institute of Chemical Physics, Chinese Academy of Sciences, Dalian 116023, China

<sup>b</sup>University of Chinese Academy of Sciences, Beijing 100049, China

E-mail: dhquan@dicp.ac.cn

**Table of Contents**

|                                                                                   |           |
|-----------------------------------------------------------------------------------|-----------|
| <b>I. General Information</b> .....                                               | <b>1</b>  |
| <b>II. General Procedure for Asymmetric Hydrogenation of the Substrates</b> ..... | <b>2</b>  |
| <b>III. Deuterium Labelling Experiments</b> .....                                 | <b>36</b> |
| <b>IV. Monitoring the Ees along with the Reaction Process</b> .....               | <b>37</b> |
| <b>V. Gram-scale Reaction and Synthetic Transformations</b> .....                 | <b>38</b> |
| <b>VI. References</b> .....                                                       | <b>39</b> |
| <b>VII. NMR Spectra</b> .....                                                     | <b>39</b> |

## I. General Information

All reactions were carried out under a nitrogen atmosphere. Solvents were purified by standard procedure before use. Commercial reagents were used without further purification. Flash chromatography was performed on silica gel 60 (40-63 $\mu$ m, 60 $\text{\AA}$ ). Thin layer chromatography (TLC) was performed on glass plates coated with silica gel 60 with F254 indicator. Proton nuclear magnetic resonance ( $^1\text{H}$  NMR) spectra were recorded on a Bruker 400 MHz spectrometer. Chemical shifts for protons are reported in parts per million downfield from tetramethylsilane and are referenced to residual protium in the NMR solvent ( $\text{CHCl}_3 = \delta$  7.26). Carbon nuclear magnetic resonance ( $^{13}\text{C}$  NMR) spectra were recorded on a Bruker 100 MHz spectrometer. Chemical shifts for carbon are reported in parts per million downfield from tetramethylsilane and are referenced to the carbon resonances of the solvent ( $\text{CDCl}_3 = \delta$  77.07). Phosphorus nuclear magnetic resonance ( $^{31}\text{P}$  NMR) spectra were recorded on a Bruker 162 MHz spectrometer. Chemical shifts for phosphorus are reported in parts per million downfield from the external 85%  $\text{H}_3\text{PO}_4$  signal at 0.0 ppm as a standard. Data are represented as follows: chemical shift, multiplicity (br = broad, s = singlet, d = doublet, t = triplet, q = quartet, m = multiplet), coupling constants in Hertz (Hz) integration. Enantiomeric ratios were determined by chiral HPLC with *n*-hexane and *i*-PrOH as solvents. Optical rotations were recorded on a JASCO P-1020 polarimeter. ESI HRMS spectra were recorded on Bio TOFQ. Conversions were determined by GC.  $\beta$ -enamido phosphonates<sup>[1-4]</sup> and  $\beta$ -substituted  $\alpha$ -enamido phosphonates<sup>[5]</sup> were prepared according to the literatures.

## II. General Procedure for Asymmetric Hydrogenation of the Substrates

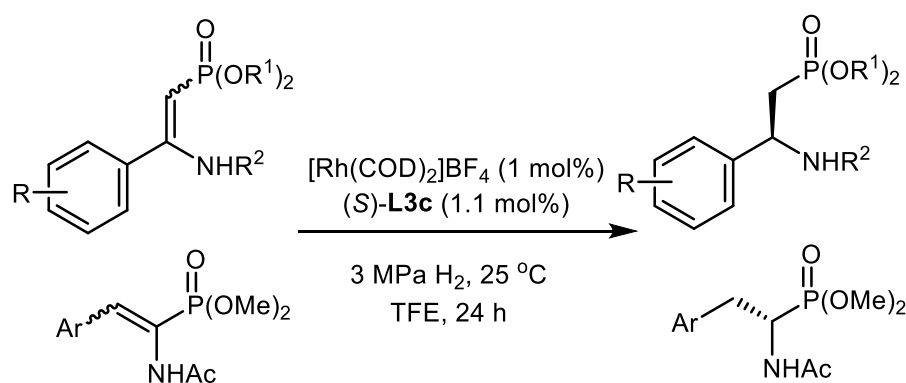

In a nitrogen-filled glovebox, a stainless steel autoclave was charged with  $[\text{Rh}(\text{COD})_2]\text{BF}_4$  (0.00125mmol, 0.01 equiv), (S)-L3c (0.001375mmol, 0.011 equiv) in 1.0 mL of a degassed TFE. After stirring for 60 min at room temperature, the reaction mixture was added to a mixture of the substrate (**1a-l**, **3a-j**) (0.125 mmol, 1 equiv) in 1.0 mL of the same solvent, and the hydrogenation was performed at 25  $^\circ\text{C}$  under  $\text{H}_2$  pressure of 3 MPa for 24 h. The solvent was then evaporated, and the residue was purified by flash

column chromatography to give the corresponding hydrogenation product (**2a-l**, **4a-j**).

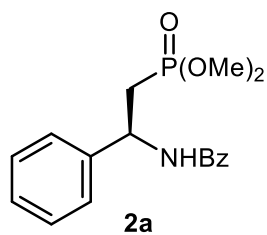

**dimethyl (S)-(2-benzamido-2-phenylethyl)phosphonate (2a).**<sup>[6]</sup> 41.7 mg (99% yield) of **2a** was obtained as a white solid after purification with column chromatography on silica gel (hexanes/EtOAc/methanol, 1/1/0.1). 97% ee was determined by chiral HPLC (Chiralcel OD-H, *n*-hexane/*i*-PrOH = 80/20, 0.8 mL/min, 254 nm, 40 °C):  $t_R$  (major) = 9.2 min,  $t_R$  (minor) = 11.8 min.  $[\alpha]_D^{20} = -23.5$  ( $c$  1.2, CH<sub>2</sub>Cl<sub>2</sub>). <sup>1</sup>H NMR (400 MHz, CDCl<sub>3</sub>)  $\delta$  8.15 (d,  $J = 7.4$  Hz, 1H), 7.94 – 7.92 (m, 2H), 7.51 – 7.31 (m, 7H), 7.27 – 7.23 (m, 1H), 5.61 (ddd,  $J = 26.1, 12.9, 7.0$  Hz, 1H), 3.69 (d,  $J = 11.0$  Hz, 3H), 3.39 (d,  $J = 11.1$  Hz, 3H), 2.54 – 2.36 (m, 2H); <sup>13</sup>C NMR (176 MHz, CDCl<sub>3</sub>)  $\delta$  166.4, 141.2 (d,  $J_{C-p} = 8.3$  Hz), 134.0, 131.6, 128.7, 128.6, 127.6, 127.2, 126.0, 52.5 (d,  $J_{C-p} = 6.5$  Hz), 52.4 (d,  $J_{C-p} = 6.7$  Hz), 48.7 (d,  $J_{C-p} = 5.5$  Hz), 31.6 (d,  $J_{C-p} = 138.1$  Hz); <sup>31</sup>P NMR (162 MHz, CDCl<sub>3</sub>)  $\delta$  30.7.

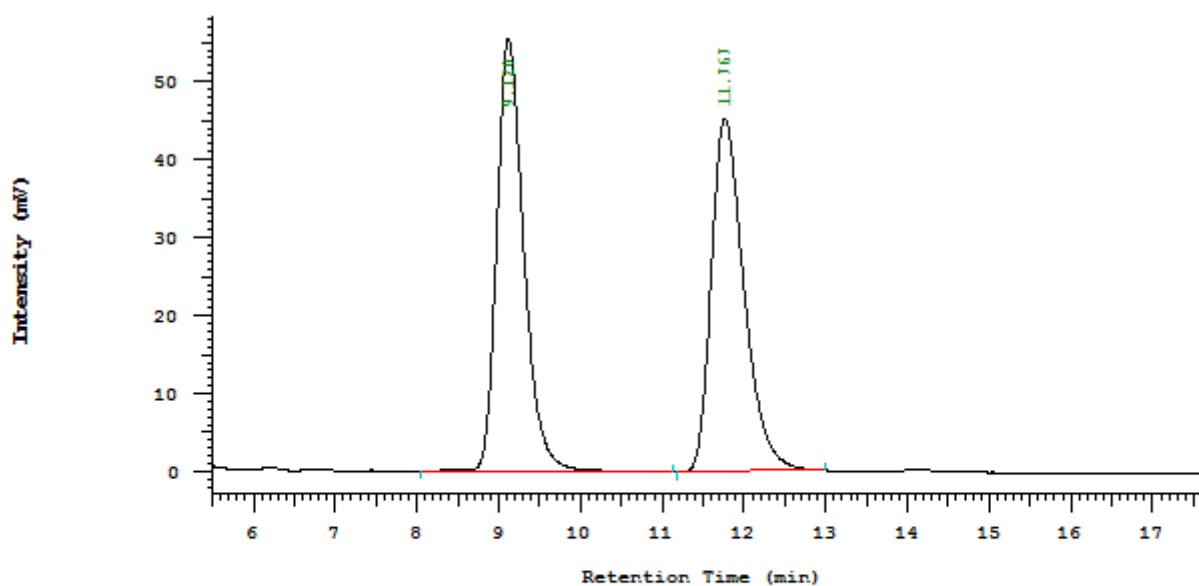

| No. | RT     | Area    | Conc 1  |
|-----|--------|---------|---------|
| 1   | 9.120  | 1286773 | 50.474  |
| 2   | 11.767 | 1262622 | 49.526  |
|     |        | 2549395 | 100.000 |

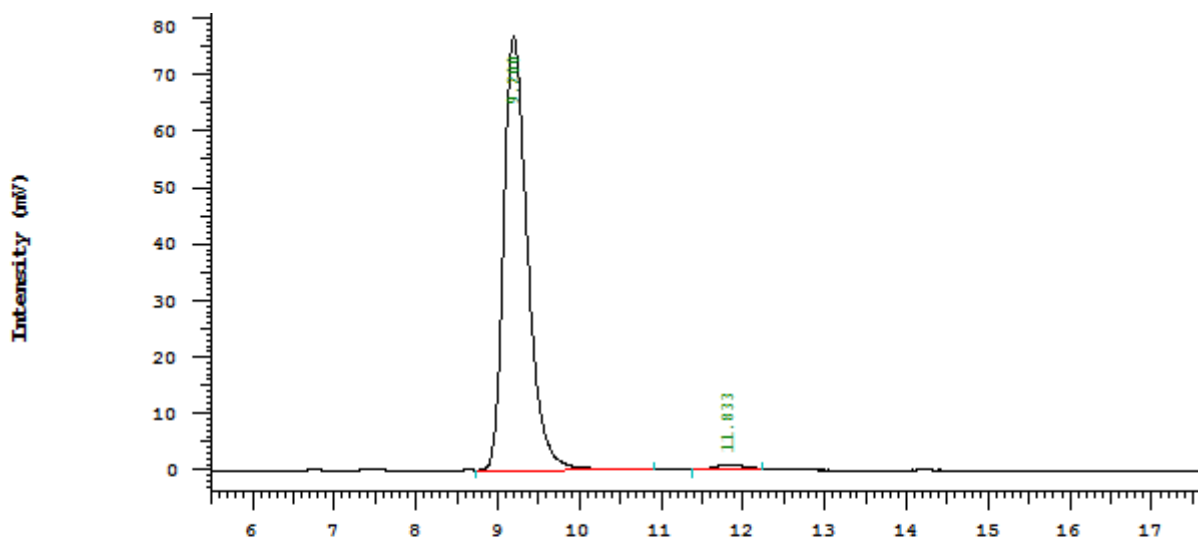

| No. | RT     | Area    | Conc 1  |
|-----|--------|---------|---------|
| 1   | 9.200  | 1553242 | 98.624  |
| 2   | 11.833 | 21667   | 1.376   |
|     |        | 1574909 | 100.000 |

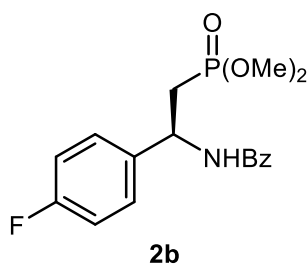

**dimethyl (S)-(2-benzamido-2-(4-fluorophenyl)ethyl)phosphonate (2b).** 43.6 mg

(99% yield) of **2b** was obtained as white solid after purification with column chromatography on silica gel (hexanes/EtOAc/methanol, 1/1/0.1). M.P.: 114 – 116 °C. 97% ee was determined by chiral HPLC (Chiralcel OD-H, *n*-hexane/*i*-PrOH = 80/20, 0.8 mL/min, 254 nm, 40 °C):  $t_R$ (major) = 9.1 min,  $t_R$ (minor) = 10.9 min.  $[\alpha]_D^{20} = -19.2$  (*c* 0.9, CH<sub>2</sub>Cl<sub>2</sub>). <sup>1</sup>H NMR (400 MHz, CDCl<sub>3</sub>) δ 8.16 (d, *J* = 7.0 Hz, 1H), 7.93 (d, *J* = 7.7 Hz, 2H), 7.52 – 7.43 (m, 3H), 7.38 – 7.34 (m, 2H), 7.03 (t, *J* = 8.4 Hz, 2H), 5.58 (ddd, *J* = 26.9, 12.9, 6.4 Hz, 1H), 3.72 (d, *J* = 11.0 Hz, 3H), 3.45 (d, *J* = 11.1 Hz, 3H), 2.49 – 2.34 (m, 2H); <sup>13</sup>C NMR (101 MHz, CDCl<sub>3</sub>) δ 166.4, 162.1 (d,  $J_{C-f} = 245.9$  Hz), 137.0 (dd, *J* = 9.8, 4.6 Hz), 133.8, 131.8, 128.7, 127.7 (d, *J* = 8.1 Hz), 127.2, 115.5 (d, *J* = 21.6 Hz), 52.6 (d,  $J_{C-p} = 6.6$  Hz), 52.4 (d,  $J_{C-p} = 6.7$  Hz), 48.2 (d,  $J_{C-p} = 5.6$  Hz), 31.5 (d,  $J_{C-p} = 138.3$  Hz); <sup>31</sup>P NMR (162 MHz, CDCl<sub>3</sub>) δ 30.6. HRMS calc. for C<sub>17</sub>H<sub>20</sub>FNO<sub>4</sub>P [M+H]<sup>+</sup>: 352.1108, found: 352.1114.

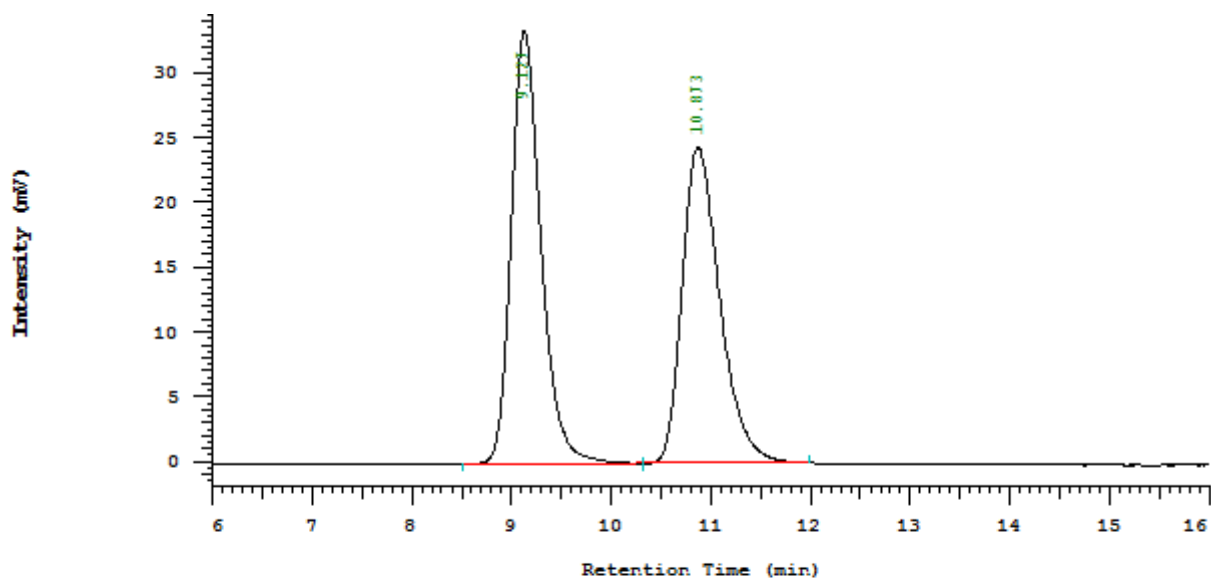

| No. | RT     | Area    | Conc 1  |
|-----|--------|---------|---------|
| 1   | 9.127  | 695886  | 51.889  |
| 2   | 10.873 | 645223  | 48.111  |
|     |        | 1341109 | 100.000 |

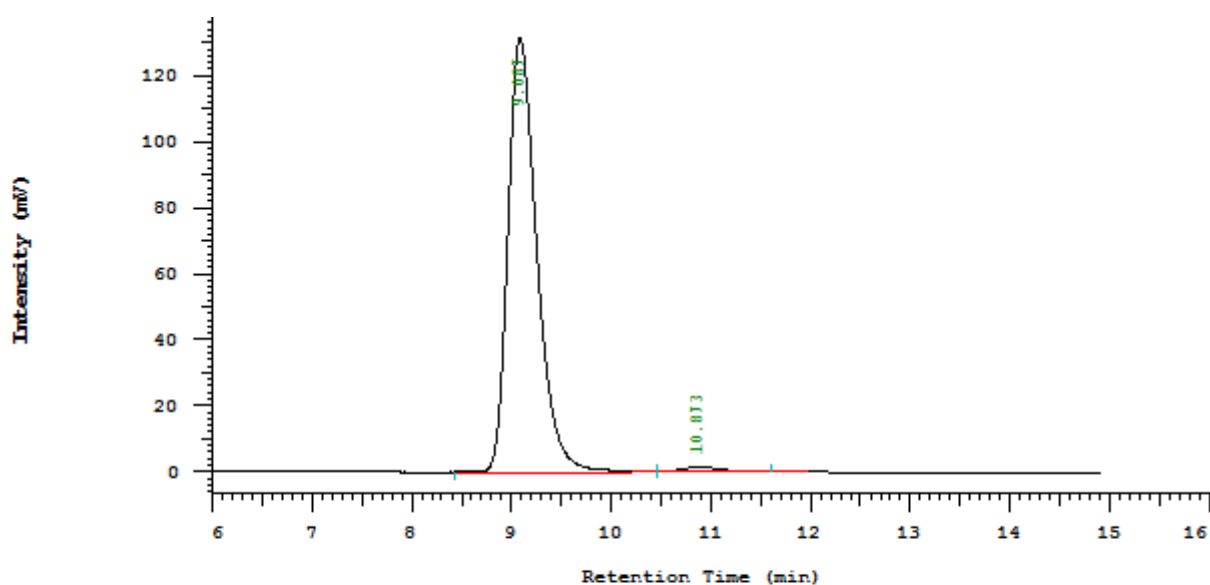

| No. | RT     | Area    | Conc 1  |
|-----|--------|---------|---------|
| 1   | 9.087  | 2651467 | 98.591  |
| 2   | 10.873 | 37887   | 1.409   |
|     |        | 2689354 | 100.000 |

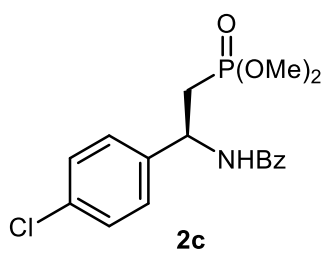

dimethyl (*S*)-(2-benzamido-2-(4-chlorophenyl)ethyl)phosphonate (**2c**).<sup>[6]</sup> 45.7

mg (99% yield) of **2c** was obtained as white solid after purification with column chromatography on silica gel (hexanes/EtOAc/methanol, 1/1/0.1). M.P.: 184 – 186 °C. 96% ee was determined by chiral HPLC (Chiralcel OD-H, *n*-hexane/*i*-PrOH = 80/20, 0.8 mL/min, 254 nm, 40 °C):  $t_R$  (major) = 9.2 min,  $t_R$  (minor) = 15.9 min.  $[\alpha]_D^{20} = -22.4$  (*c* 1.3, CH<sub>2</sub>Cl<sub>2</sub>). <sup>1</sup>H NMR (400 MHz, CDCl<sub>3</sub>) δ 8.18 (d, *J* = 7.0 Hz, 1H), 7.93 (d, *J* = 7.6 Hz, 2H), 7.52 – 7.44 (m, 3H), 7.34 – 7.30 (m, 4H), 5.56 (ddd, *J* = 26.7, 12.9, 6.4 Hz, 1H), 3.72 (d, *J* = 11.0 Hz, 3H), 3.46 (d, *J* = 11.1 Hz, 3H), 2.41 (dd, *J* = 16.3, 5.6 Hz, 2H); <sup>13</sup>C NMR (101 MHz, CDCl<sub>3</sub>) δ 166.4, 139.8 (d, *J*<sub>C-p</sub> = 8.4 Hz), 133.7, 133.3, 131.8, 128.8, 128.7, 127.4, 127.2, 52.6 (d, *J*<sub>C-p</sub> = 6.6 Hz), 52.4 (d, *J*<sub>C-p</sub> = 6.7 Hz), 48.3 (d, *J*<sub>C-p</sub> = 5.8 Hz), 31.4 (d, *J*<sub>C-p</sub> = 138.2 Hz); <sup>31</sup>P NMR (162 MHz, CDCl<sub>3</sub>) δ 30.4.

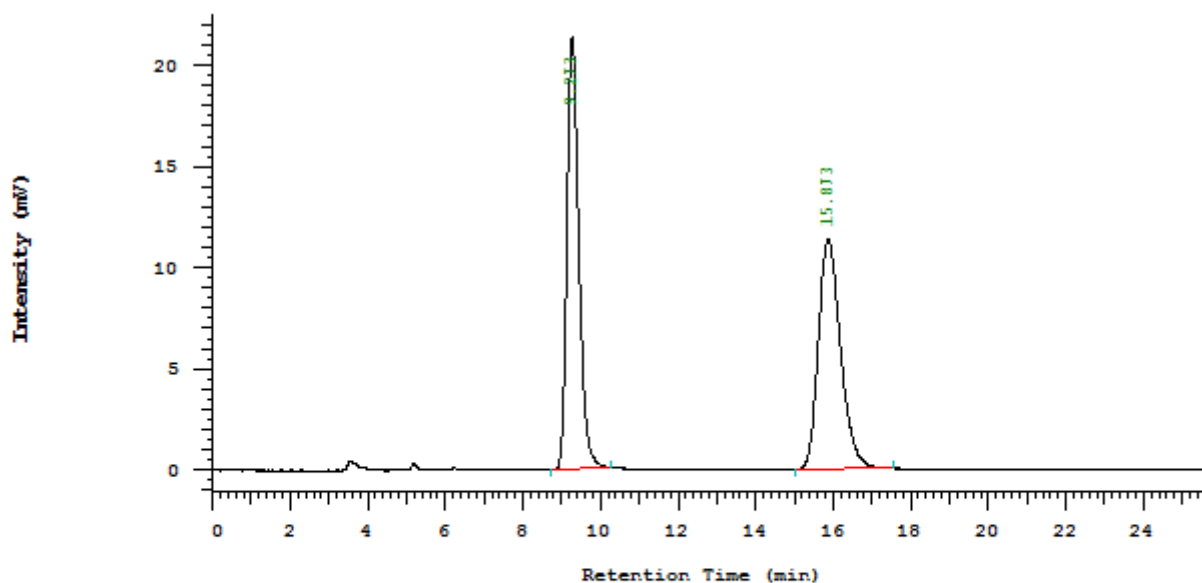

| No. | RT     | Area   | Conc 1  |
|-----|--------|--------|---------|
| 1   | 9.273  | 451014 | 49.990  |
| 2   | 15.873 | 451192 | 50.010  |
|     |        | 902206 | 100.000 |

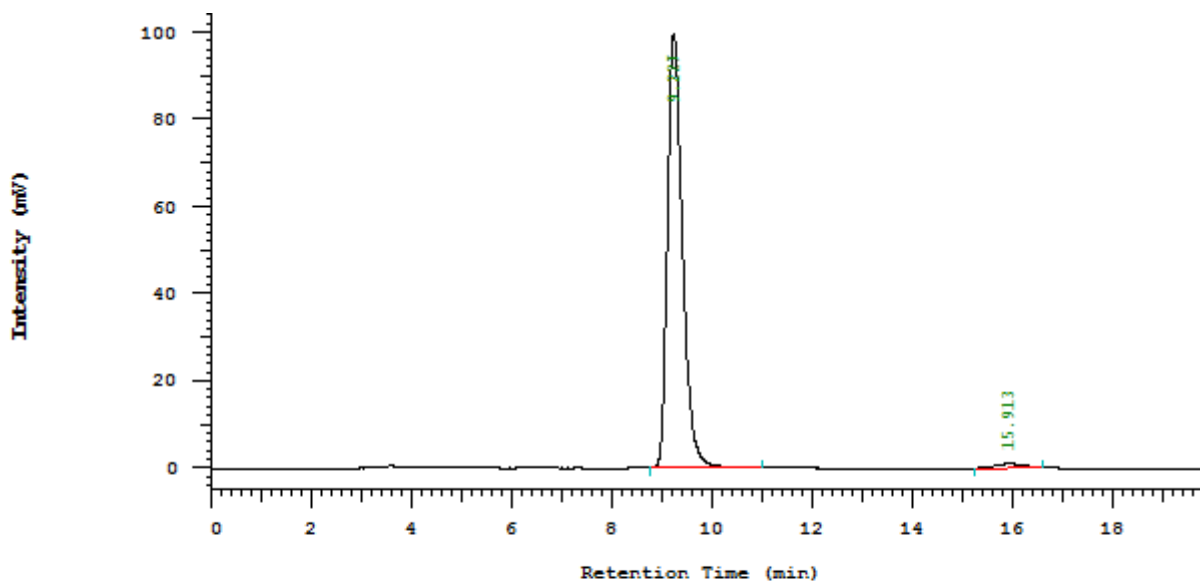

| No. | RT     | Area    | Conc 1  |
|-----|--------|---------|---------|
| 1   | 9.227  | 2083228 | 98.213  |
| 2   | 15.913 | 37901   | 1.787   |
|     |        | 2121129 | 100.000 |

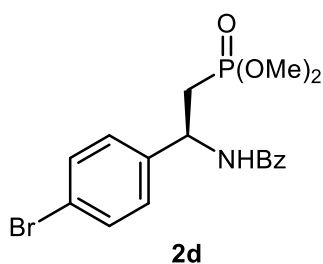

**dimethyl (S)-(2-benzamido-2-(4-bromophenyl)ethyl)phosphonate (2d).** <sup>[6]</sup> 51.1

mg (99% yield) of **2d** was obtained as white solid after purification with column chromatography on silica gel (hexanes/EtOAc/methanol, 1/1/0.1). M.p.: 92 – 94 °C. 97% ee was determined by chiral HPLC (Chiralcel OD-H, *n*-hexane/*i*-PrOH = 80/20, 0.8 mL/min, 254 nm, 40 °C):  $t_R$  (major) = 9.6 min,  $t_R$  (minor) = 22.9 min.  $[\alpha]_D^{20} = -16.8$  (*c* 0.8, CH<sub>2</sub>Cl<sub>2</sub>). <sup>1</sup>H NMR (400 MHz, CDCl<sub>3</sub>) δ 8.17 (d,  $J = 6.9$  Hz, 1H), 7.92 (d,  $J = 7.8$  Hz, 2H), 7.54 – 7.44 (m, 5H), 7.28 – 7.25 (m, 2H), 5.54 (dq,  $J = 26.8, 6.5$  Hz, 1H), 3.73 (d,  $J = 11.0$  Hz, 3H), 3.46 (d,  $J = 11.1$  Hz, 3H), 2.40 (dd,  $J = 16.6, 6.0$  Hz, 2H); <sup>13</sup>C NMR (101 MHz, CDCl<sub>3</sub>) δ 166.4, 140.4 (d,  $J_{C-p} = 8.6$  Hz), 133.7, 131.8, 131.8, 128.7, 127.8, 127.2, 121.4, 52.6 (d,  $J_{C-p} = 6.6$  Hz), 52.5 (d,  $J_{C-p} = 6.7$  Hz), 48.4 (d,  $J_{C-p} = 5.8$  Hz), 31.3 (d,  $J_{C-p} = 138.5$  Hz); <sup>31</sup>P NMR (162 MHz, CDCl<sub>3</sub>) δ 30.4.

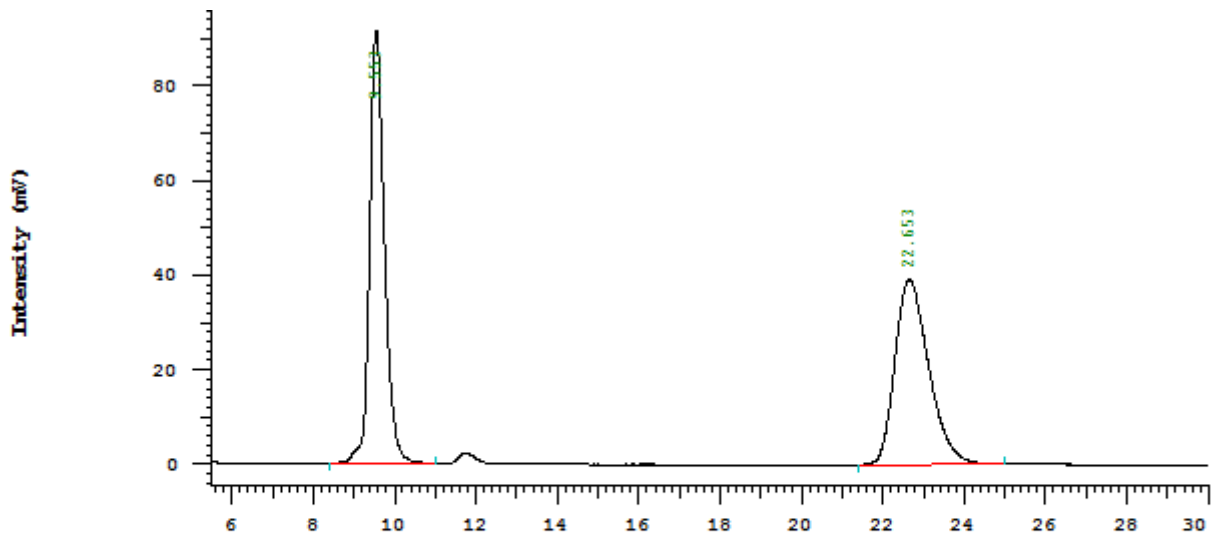

| No. | RT     | Area    | Conc 1  |
|-----|--------|---------|---------|
| 1   | 9.553  | 2335339 | 50.862  |
| 2   | 22.653 | 2256174 | 49.138  |
|     |        | 4591513 | 100.000 |

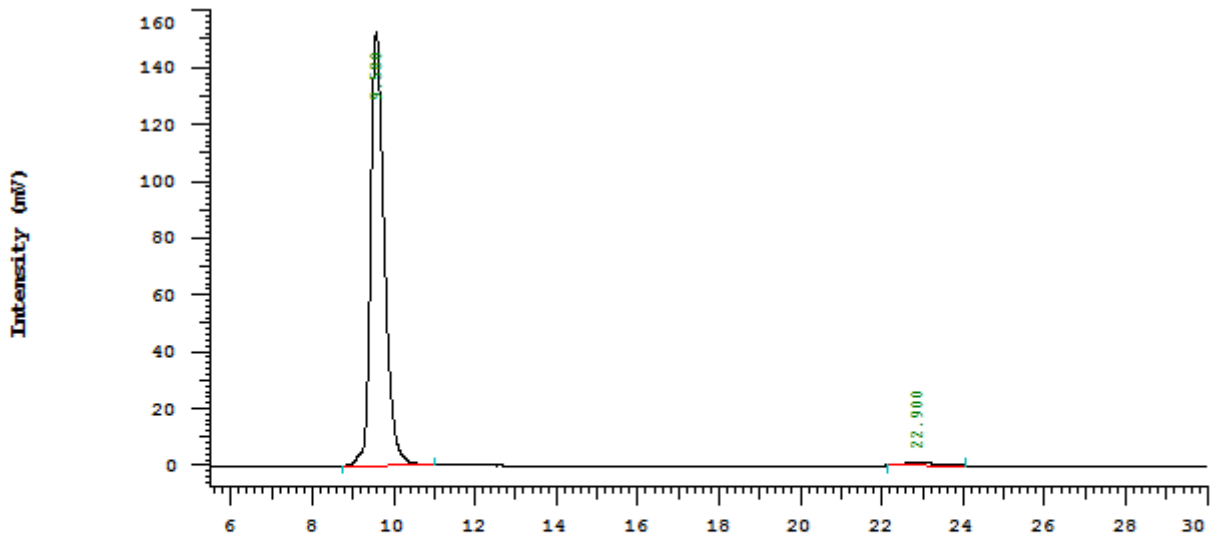

| No. | RT     | Area    | Conc 1  |
|-----|--------|---------|---------|
| 1   | 9.580  | 3584987 | 98.471  |
| 2   | 22.900 | 55651   | 1.529   |
|     |        | 3640638 | 100.000 |



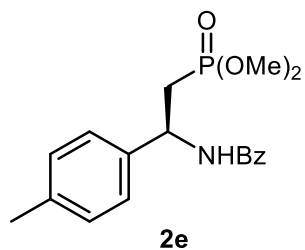

**dimethyl (S)-2-benzamido-2-(p-tolyl)ethylphosphonate (2e).**<sup>[6]</sup> 43.1 mg (>99% yield) of **2e** was obtained as colorless oil after purification with column chromatography on silica gel (hexanes/EtOAc/methanol, 1/1/0.1). 97% ee was determined by chiral HPLC (Chiralcel OD-H, *n*-hexane/*i*-PrOH = 80/20, 0.8 mL/min, 254 nm, 40 °C):  $t_R$  (major) = 8.1 min,  $t_R$  (minor) = 19.6 min.  $[\alpha]_D^{20} = -24.5$  ( $c$  3.2,  $\text{CH}_2\text{Cl}_2$ ).  $^1\text{H}$  NMR (400 MHz,  $\text{CDCl}_3$ )  $\delta$  8.08 (d,  $J = 7.3$  Hz, 1H), 7.91 (d,  $J = 7.8$  Hz, 2H), 7.50 – 7.39 (m, 3H), 7.26 (d,  $J = 7.8$  Hz, 2H), 7.13 (d,  $J = 7.8$  Hz, 2H), 5.55 (ddd,  $J = 24.4, 13.1, 6.8$  Hz, 1H), 3.69 (d,  $J = 10.9$  Hz, 3H), 3.42 (d,  $J = 11.0$  Hz, 3H), 2.53 – 2.37 (m, 2H), 2.31 (s, 3H);  $^{13}\text{C}$  NMR (101 MHz,  $\text{CDCl}_3$ )  $\delta$  166.4, 138.3 (d,  $J_{C-p} = 8.7$  Hz), 137.2, 134.1, 131.5, 129.3, 128.6, 127.2, 126.0, 52.5 (d,  $J_{C-p} = 6.6$  Hz), 52.4 (d,  $J_{C-p} = 6.6$  Hz), 48.6 (d,  $J_{C-p} = 5.3$  Hz), 31.6 (d,  $J_{C-p} = 137.8$  Hz), 21.1;  $^{31}\text{P}$  NMR (162 MHz,  $\text{CDCl}_3$ )  $\delta$  30.8.

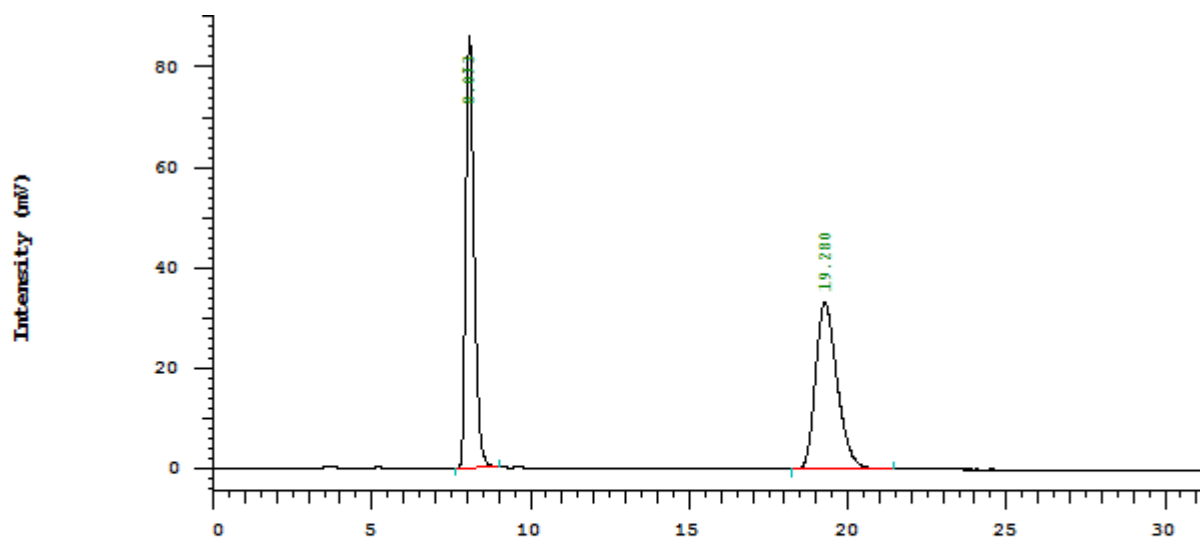

| No. | RT     | Area    | Conc 1  |
|-----|--------|---------|---------|
| 1   | 8.073  | 1564528 | 49.905  |
| 2   | 19.280 | 1570464 | 50.095  |
|     |        | 3134992 | 100.000 |

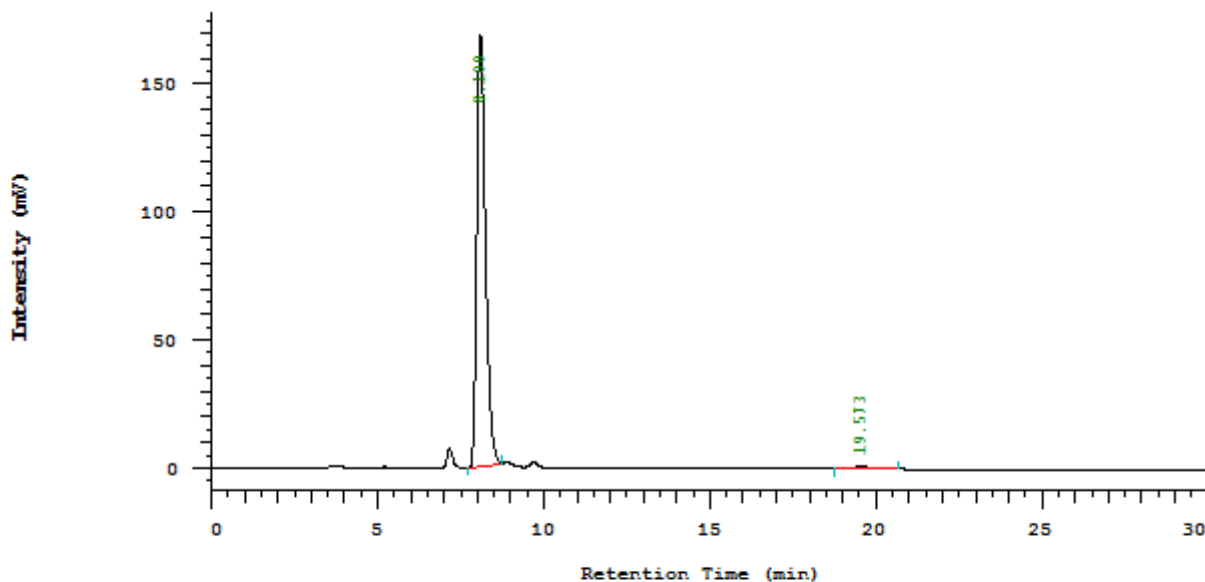

| No. | RT     | Area    | Conc 1  |
|-----|--------|---------|---------|
| 1   | 8.100  | 3056240 | 98.688  |
| 2   | 19.573 | 40642   | 1.312   |
|     |        | 3096882 | 100.000 |

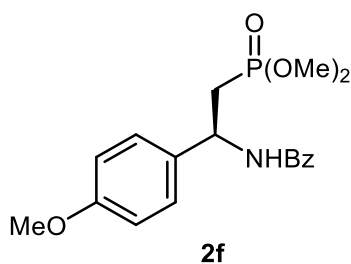

**dimethyl (S)-(2-benzamido-2-(4-methoxyphenyl)ethyl)phosphonate (2f).** <sup>[6]</sup>

45.2 mg (>99% yield) of **2f** was obtained as colorless oil after purification with column chromatography on silica gel (hexanes/EtOAc/methanol, 1/1/0.1). 97% ee was determined by chiral HPLC (Chiralcel OD-H, *n*-hexane/*i*-PrOH = 80/20, 0.8 mL/min, 254 nm, 40 °C):  $t_R$  (major) = 11.7 min,  $t_R$  (minor) = 24.4 min.  $[\alpha]_D^{20} = -22.5$  (*c* 0.8, CH<sub>2</sub>Cl<sub>2</sub>). <sup>1</sup>H NMR (400 MHz, CDCl<sub>3</sub>) δ 8.00 (d,  $J = 7.3$  Hz, 1H), 7.92 (d,  $J = 7.8$  Hz, 2H), 7.47 (dt,  $J = 25.1, 7.4$  Hz, 3H), 7.31 (d,  $J = 8.2$  Hz, 2H), 6.88 (d,  $J = 8.1$  Hz, 2H), 5.55 (ddd,  $J = 25.7, 13.0, 6.5$  Hz, 1H), 3.78 (s, 3H), 3.70 (d,  $J = 10.9$  Hz, 3H), 3.44 (d,  $J = 11.0$  Hz, 3H), 2.52 – 2.35 (m, 2H); <sup>13</sup>C NMR (101 MHz, CDCl<sub>3</sub>) δ 166.4, 159.0, 134.0, 133.3 (d,  $J_{C-p} = 8.2$  Hz), 131.6, 128.6, 127.2, 127.2, 114.1, 55.3, 52.5, 52.5 (d,  $J_{C-p} = 3.6$  Hz), 52.4 (d,  $J_{C-p} = 3.6$  Hz), 48.3 (d,  $J_{C-p} = 5.4$  Hz), 31.6 (d,  $J_{C-p} = 137.6$  Hz); <sup>31</sup>P NMR (162 MHz, CDCl<sub>3</sub>) δ 30.9.

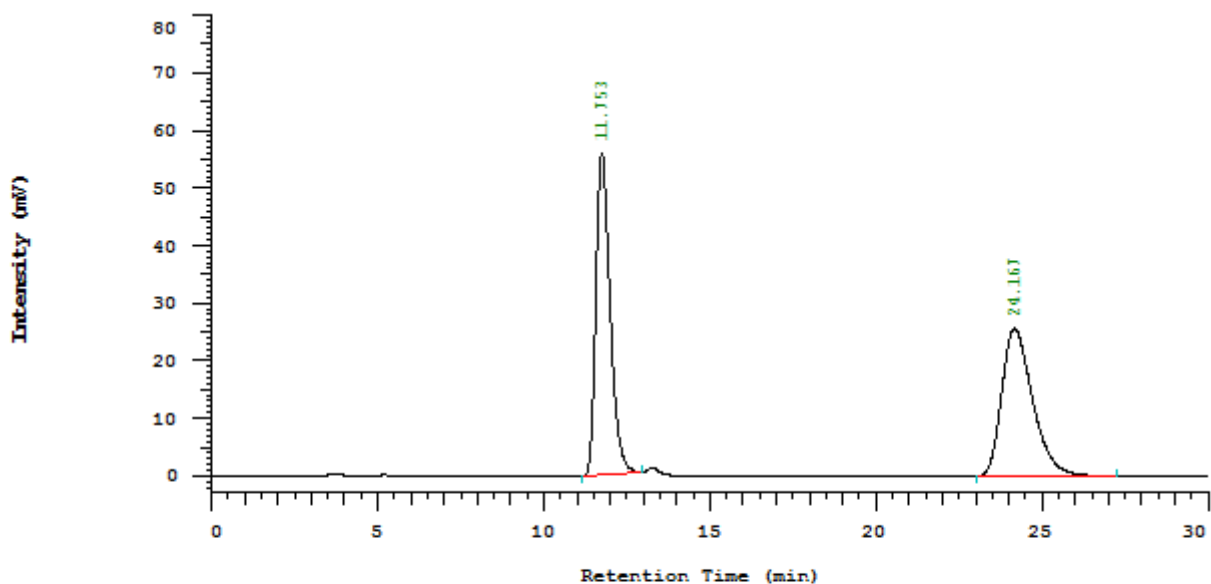

| No. | RT     | Area    | Conc 1  |
|-----|--------|---------|---------|
| 1   | 11.753 | 1652668 | 49.823  |
| 2   | 24.167 | 1664389 | 50.177  |
|     |        | 3317057 | 100.000 |

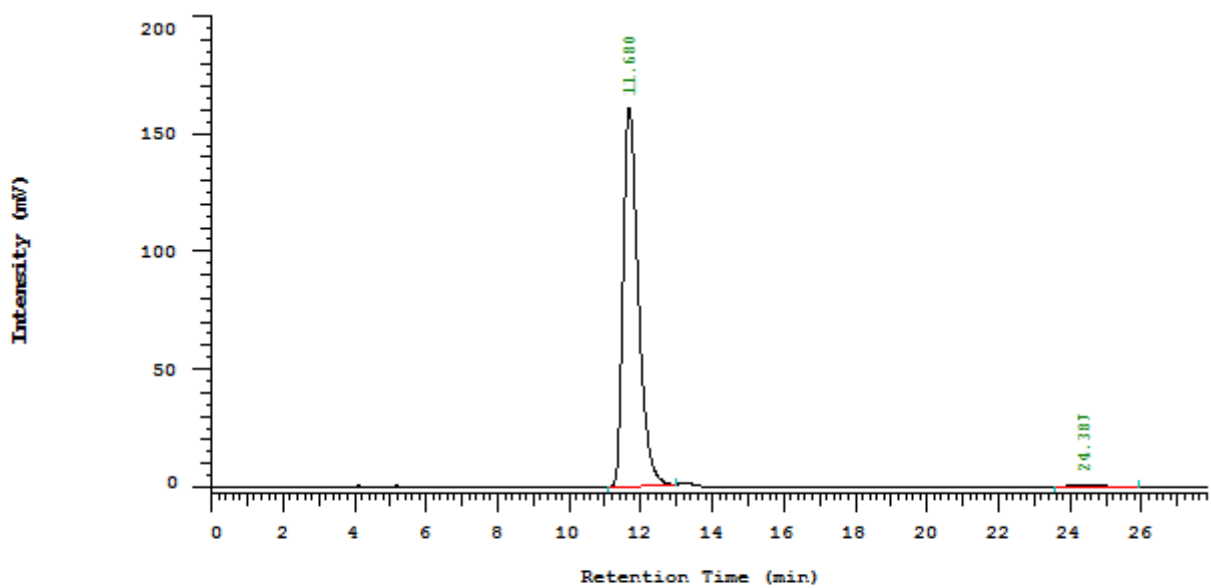

| No. | RT     | Area    | Conc 1  |
|-----|--------|---------|---------|
| 1   | 11.680 | 4707099 | 98.558  |
| 2   | 24.387 | 68870   | 1.442   |
|     |        | 4775969 | 100.000 |

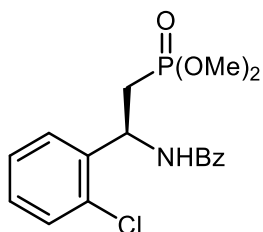

**2g**

**dimethyl (S)-(2-benzamido-2-(2-chlorophenyl)ethyl)phosphonate (2g).** <sup>[6]</sup> 44.6 mg

(>99% yield) of **2g** was obtained as white solid after purification with column chromatography on silica gel (hexanes/EtOAc/methanol, 1/1/0.1). M.P.: 106 – 108 °C. 98% ee was determined by chiral HPLC (Chiralcel OD-H, *n*-hexane/*i*-PrOH = 90/10, 0.8 mL/min, 254 nm, 40 °C):  $t_R$  (major) = 16.3 min,  $t_R$  (minor) = 18.4 min.  $[\alpha]_D^{20} = -74.1$  (*c* 3.4, CH<sub>2</sub>Cl<sub>2</sub>). <sup>1</sup>H NMR (400 MHz, CDCl<sub>3</sub>) δ 8.43 (d, *J* = 7.0 Hz, 1H), 7.95 (d, *J* = 7.7 Hz, 2H), 7.53 – 7.43 (m, 4H), 7.37 (d, *J* = 7.4 Hz, 1H), 7.25 – 7.18 (m, 2H), 5.86 (ddd, *J* = 26.7, 12.5, 6.7 Hz, 1H), 3.73 (d, *J* = 11.0 Hz, 3H), 3.43 (d, *J* = 11.1 Hz, 3H), 2.64 – 2.39 (m, 2H); <sup>13</sup>C NMR (101 MHz, CDCl<sub>3</sub>) δ 166.1, 138.5 (d, *J*<sub>C-p</sub> = 8.4 Hz), 133.7, 132.2, 131.7, 129.9, 128.8, 128.7, 127.4, 127.2, 127.1, 52.6 (d, *J*<sub>C-p</sub> = 6.6 Hz), 52.3 (d, *J*<sub>C-p</sub> = 6.8 Hz), 46.8 (d, *J*<sub>C-p</sub> = 5.9 Hz), 28.7 (d, *J*<sub>C-p</sub> = 137.9 Hz); <sup>31</sup>P NMR (162 MHz, CDCl<sub>3</sub>) δ 30.7.

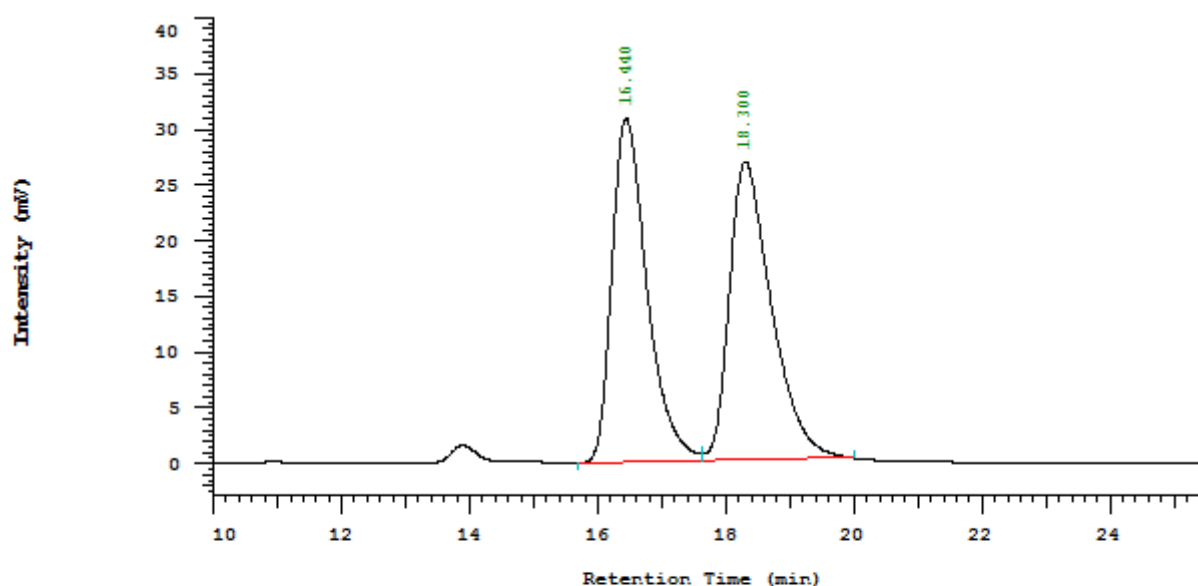

| No. | RT     | Area    | Conc 1  |
|-----|--------|---------|---------|
| 1   | 16.440 | 1176046 | 49.012  |
| 2   | 18.300 | 1223468 | 50.988  |
|     |        | 2399514 | 100.000 |

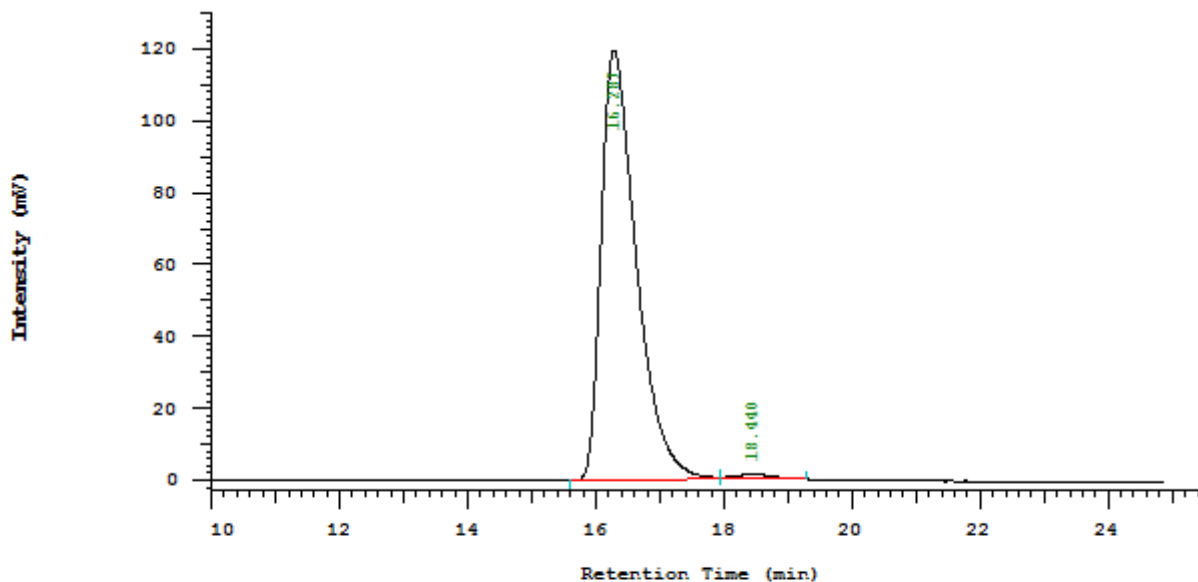

| No. | RT     | Area    | Conc 1  |
|-----|--------|---------|---------|
| 1   | 16.287 | 4618621 | 99.144  |
| 2   | 18.440 | 39879   | 0.856   |
|     |        | 4658500 | 100.000 |

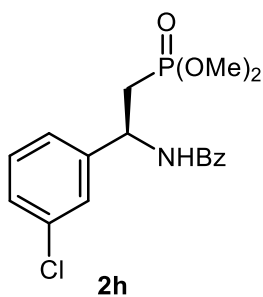

**dimethyl (S)-2-benzamido-2-(3-chlorophenyl)ethylphosphonate (2h).** 45.4 mg (99%

yield) of **2h** was obtained as colorless oil after purification with column chromatography on silica gel (hexanes/EtOAc/methanol, 1/1/0.1). 97% ee was determined by chiral HPLC (Chiralcel OD-H, *n*-hexane/*i*-PrOH = 80/20, 0.8 mL/min, 254 nm, 40 °C):  $t_R$  (major) = 8.7 min,  $t_R$  (minor) = 11.3 min.  $[\alpha]_D^{20} = -29.5$  (*c* 1.1, CH<sub>2</sub>Cl<sub>2</sub>). <sup>1</sup>H NMR (400 MHz, CDCl<sub>3</sub>) δ 8.22 (d, *J* = 6.9 Hz, 1H), 7.94 (d, *J* = 7.7 Hz, 2H), 7.54 – 7.37 (m, 4H), 7.28 – 7.24 (m, 3H), 5.56 (ddd, *J* = 26.5, 12.9, 6.4 Hz, 1H), 3.73 (d, *J* = 11.0 Hz, 3H), 3.47 (d, *J* = 11.1 Hz, 3H), 2.44 – 2.38 (m, 2H); <sup>13</sup>C NMR (101 MHz, CDCl<sub>3</sub>) δ 166.5, 143.5 (d, *J*<sub>C-p</sub> = 8.7 Hz), 134.6, 133.7, 131.8, 130.0, 128.7, 127.8, 127.2, 126.2, 124.3, 52.6 (d, *J*<sub>C-p</sub> = 6.6 Hz), 52.5 (d, *J*<sub>C-p</sub> = 6.8 Hz), 48.4 (d, *J*<sub>C-p</sub> = 5.8 Hz), 31.4 (d, *J*<sub>C-p</sub> = 138.7 Hz); <sup>31</sup>P NMR (162 MHz, CDCl<sub>3</sub>) δ 30.3. HRMS calc. for C<sub>17</sub>H<sub>20</sub>ClNO<sub>4</sub>P [M+H]<sup>+</sup>: 368.0813, found: 368.0821.

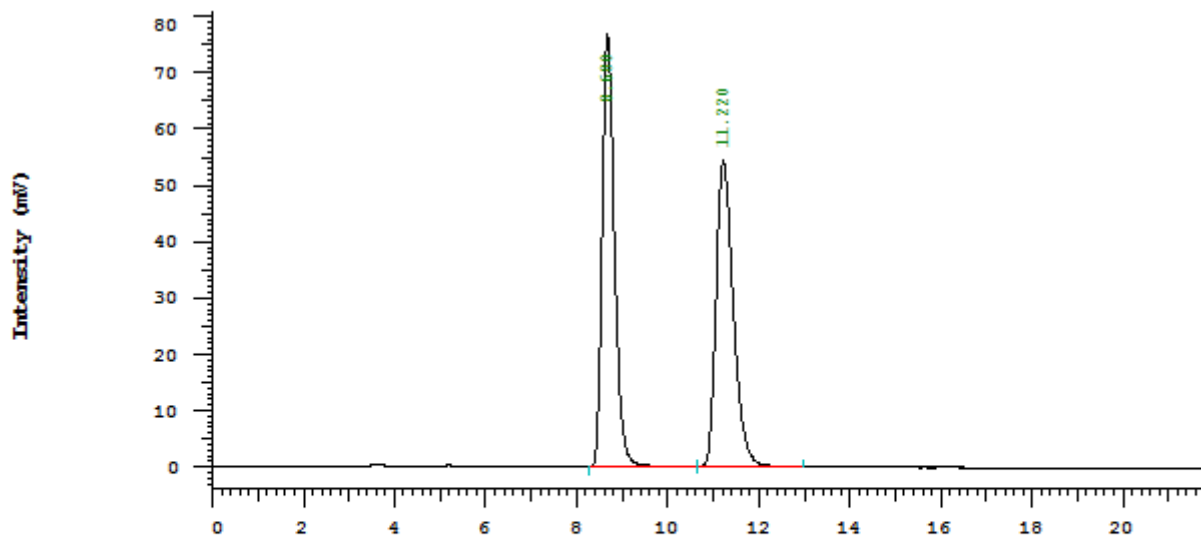

| No. | RT     | Area    | Conc 1  |
|-----|--------|---------|---------|
| 1   | 8.680  | 1454019 | 50.172  |
| 2   | 11.220 | 1444037 | 49.828  |
|     |        |         | 100.000 |

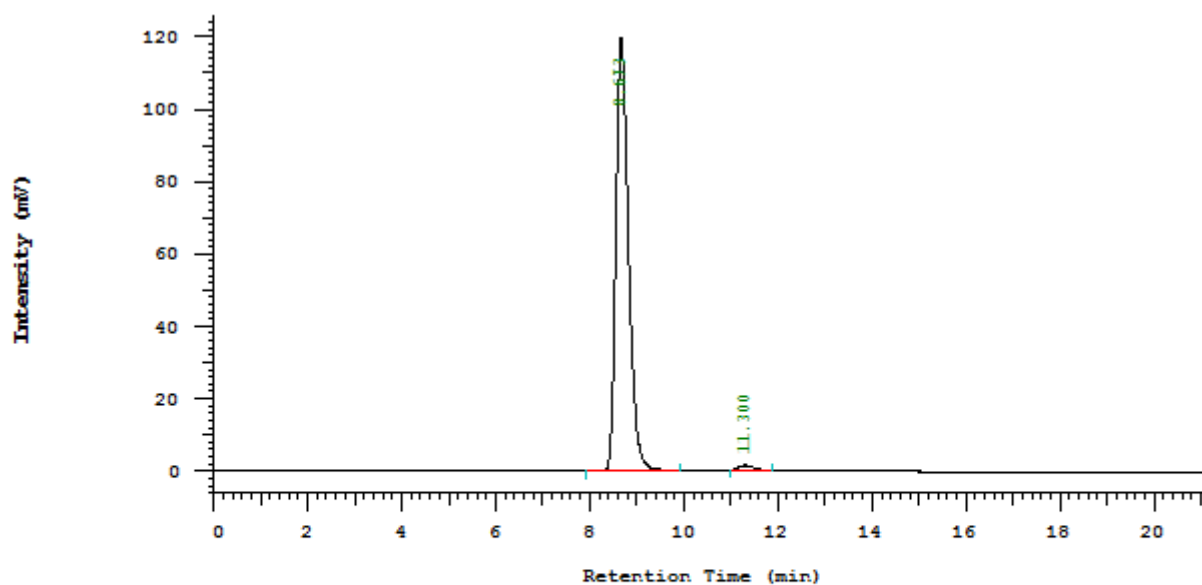

| No. | RT     | Area    | Conc 1  |
|-----|--------|---------|---------|
| 1   | 8.673  | 2243062 | 98.447  |
| 2   | 11.300 | 35377   | 1.553   |
|     |        |         | 100.000 |

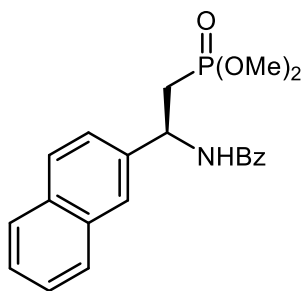

**2i**

**dimethyl (S)-(2-benzamido-2-(naphthalen-2-yl)ethyl)phosphonate (2i).** 47.6 mg

(99% yield) of **2i** was obtained as white solid after purification with column chromatography on silica gel (hexanes/EtOAc/methanol, 1/1/0.1). M.P.: 138 – 140 °C. 96% ee was determined by chiral HPLC (Chiralcel OD-H, *n*-hexane/*i*-PrOH = 80/20, 0.8 mL/min, 254 nm, 40 °C):  $t_R$  (major) = 13.2 min,  $t_R$  (minor) = 16.1 min.  $[\alpha]_D^{20} = -32.9$  (*c* 4.2, CH<sub>2</sub>Cl<sub>2</sub>). <sup>1</sup>H NMR (400 MHz, CDCl<sub>3</sub>) δ 8.28 (d, *J* = 7.5 Hz, 1H), 7.96 – 7.94 (m, 2H), 7.83 – 7.76 (m, 4H), 7.51 – 7.41 (m, 6H), 5.75 (ddd, *J* = 25.3, 12.8, 7.1 Hz, 1H), 3.69 (d, *J* = 11.0 Hz, 3H), 3.33 (d, *J* = 11.1 Hz, 3H), 2.62 – 2.41 (m, 2H); <sup>13</sup>C NMR (101 MHz, CDCl<sub>3</sub>) δ 166.5, 138.7 (d, *J*<sub>C-p</sub> = 8.7 Hz), 134.0, 133.3, 132.8, 131.7, 128.6, 128.6, 128.0, 127.6, 127.3, 126.30, 126.0, 124.7, 124.3, 52.5 (d, *J*<sub>C-p</sub> = 6.6 Hz), 52.4 (d, *J*<sub>C-p</sub> = 6.7 Hz), 48.9 (d, *J*<sub>C-p</sub> = 5.5 Hz), 31.5 (d, *J*<sub>C-p</sub> = 138.2 Hz); <sup>31</sup>P NMR (162 MHz, CDCl<sub>3</sub>) δ 31.7. HRMS calc. for C<sub>21</sub>H<sub>23</sub>NO<sub>4</sub>P [M+H]<sup>+</sup>: 384.1359, found: 384.1354.

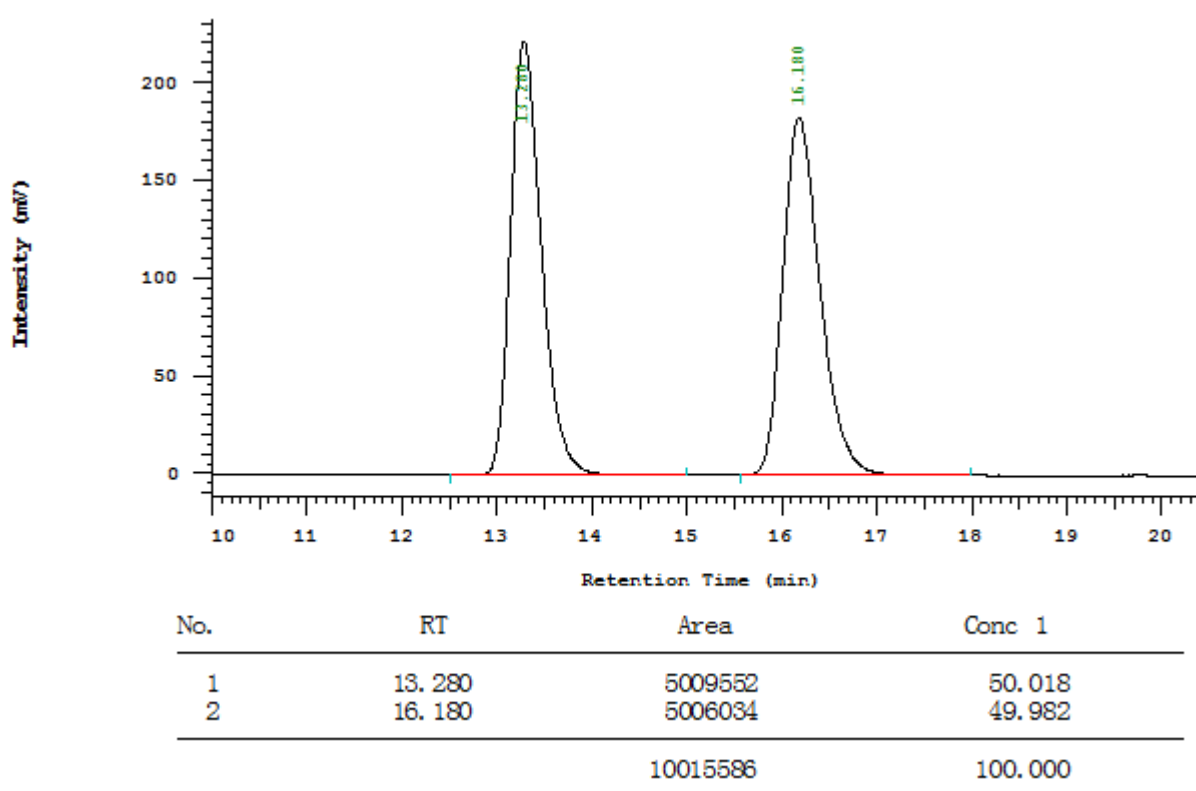

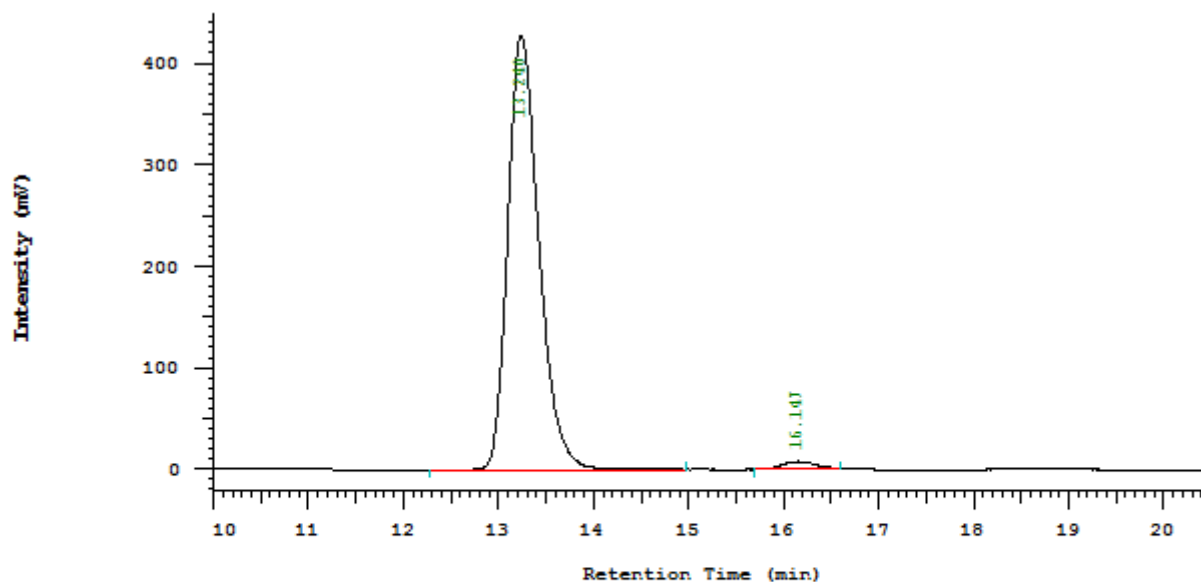

| No. | RT     | Area    | Conc 1  |
|-----|--------|---------|---------|
| 1   | 13.240 | 9706539 | 98.174  |
| 2   | 16.147 | 180556  | 1.826   |
|     |        | 9887095 | 100.000 |

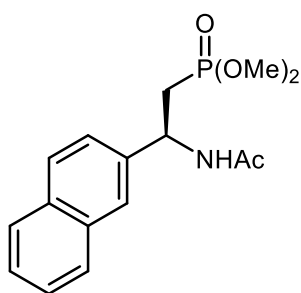

**2j**

**dimethyl (*S*)-(2-acetamido-2-(naphthalen-2-yl)ethyl)phosphonate (**2j**). 39.2 mg**

(99% yield) of **2j** was obtained as colorless oil after purification with column chromatography on silica gel (hexanes/EtOAc/methanol, 1/1/0.3). 85% ee (*Z*-**1j**) and 15% ee (*E*-**1j**) were determined by chiral HPLC (Chiralcel OJ-H, *n*-hexane/*i*-PrOH = 85/15, 0.8 mL/min, 254 nm, 40 °C):  $t_R$  (major) = 15.0 min,  $t_R$  (minor) = 21.0 min.  $[\alpha]_D^{20} = 17.8$  ( $c$  1.0, CHCl<sub>3</sub>), (*Z*-**1j**) ;  $[\alpha]_D^{20} = 0.8$  ( $c$  0.8, CHCl<sub>3</sub>), (*E*-**1j**). <sup>1</sup>H NMR (400 MHz, CDCl<sub>3</sub>)  $\delta$  7.84 – 7.79 (m, 4H), 7.50 – 7.41 (m, 3H), 7.15 (d,  $J = 7.9$  Hz, 1H), 5.64 – 5.54 (m, 1H), 3.70 (d,  $J = 11.0$  Hz, 3H), 3.31 (d,  $J = 11.0$  Hz, 3H), 2.54 – 2.34 (m, 2H), 2.09 (s, 3H); <sup>13</sup>C NMR (101 MHz, CDCl<sub>3</sub>)  $\delta$  169.6, 138.4 (d,  $J_{C-p} = 8.3$  Hz), 133.3, 132.8, 128.5, 128.0, 127.6, 126.4, 126.1, 124.8, 124.3, 52.5 (d,  $J_{C-p} = 6.7$  Hz), 52.3 (d,  $J_{C-p} = 6.8$  Hz), 48.4, 31.5 (d,  $J_{C-p} = 138.6$  Hz), 23.5; <sup>31</sup>P NMR (162 MHz, CDCl<sub>3</sub>)  $\delta$  30.3. HRMS calc. for C<sub>16</sub>H<sub>21</sub>NO<sub>4</sub>P [M+H]<sup>+</sup>: 322.1203, found: 322.1209.



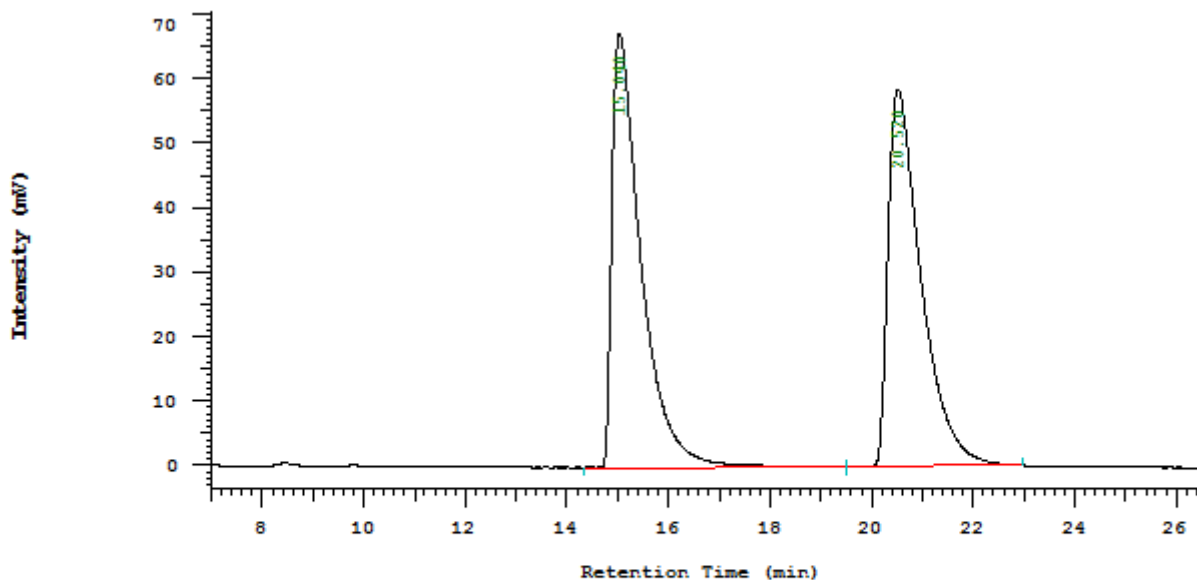

| No. | RT     | Area    | Conc 1  |
|-----|--------|---------|---------|
| 1   | 15.040 | 2704776 | 50.363  |
| 2   | 20.520 | 2665826 | 49.637  |
|     |        | 5370602 | 100.000 |

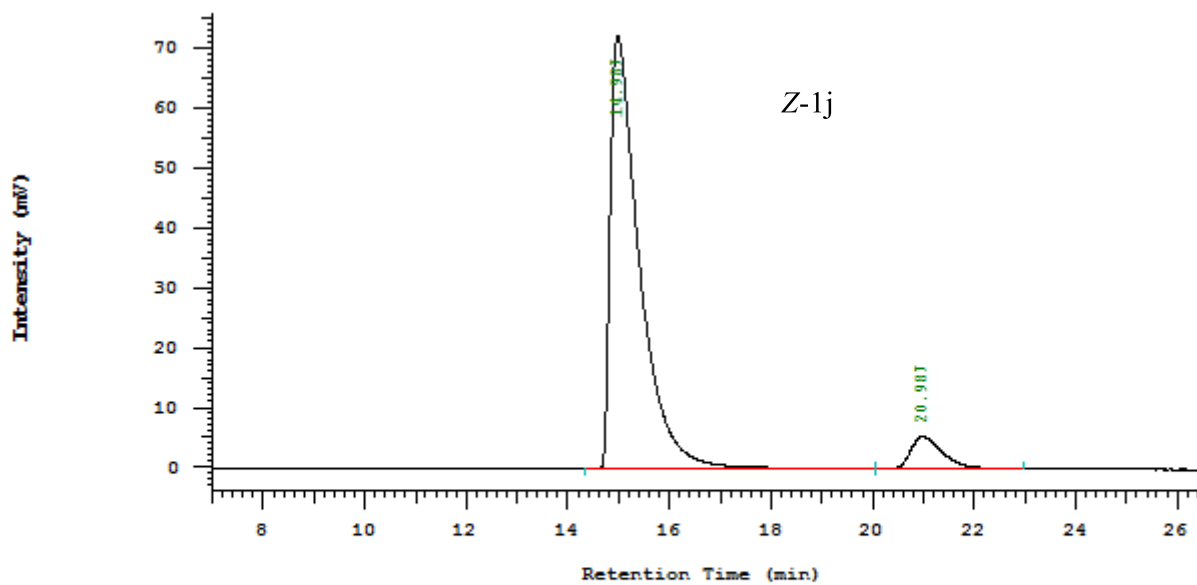

| No. | RT     | Area    | Conc 1  |
|-----|--------|---------|---------|
| 1   | 14.987 | 2895255 | 92.373  |
| 2   | 20.987 | 239045  | 7.627   |
|     |        | 3134300 | 100.000 |

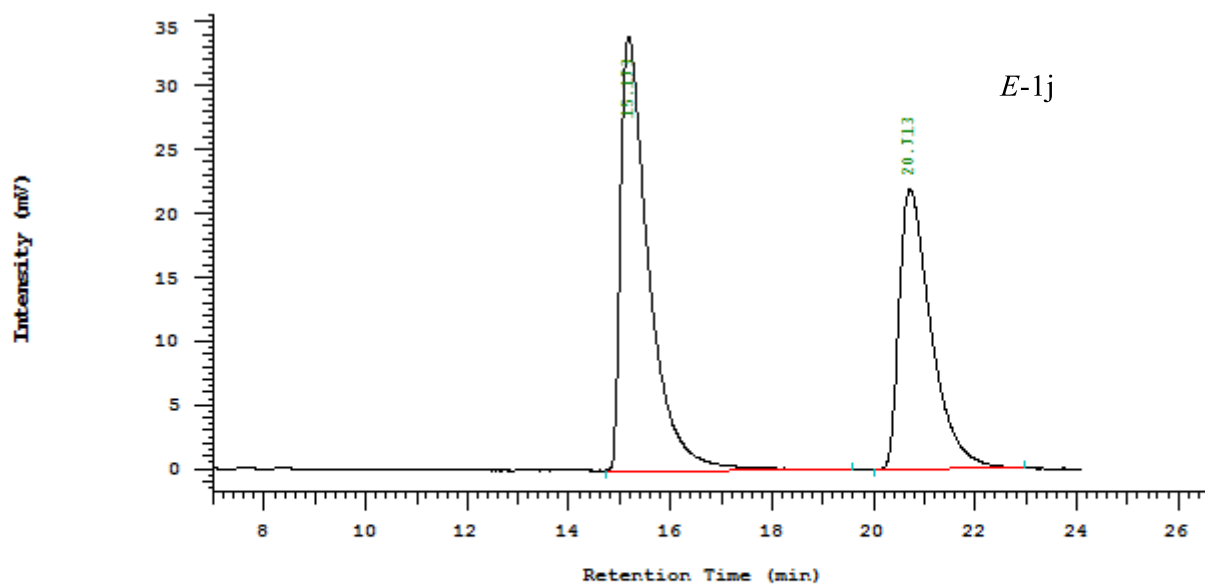

| No. | RT     | Area    | Conc 1  |
|-----|--------|---------|---------|
| 1   | 15.173 | 1311067 | 57.593  |
| 2   | 20.713 | 965357  | 42.407  |
|     |        | 2276424 | 100.000 |

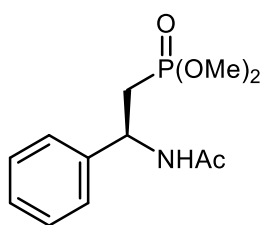

**2k**

**dimethyl (*S*)-(2-acetamido-2-phenylethyl)phosphonate (2k).**<sup>[7]</sup> 51.0 mg (>99% yield)

of **2k** was obtained as white solid after purification with column chromatography on silica gel (hexanes/EtOAc/methanol, 2/1/0.5). M.P.: 132 – 134 °C. 94% ee was determined by chiral HPLC (Chiralcel OD-H, *n*-hexane/*i*-PrOH = 85/15, 0.8 mL/min, 254 nm, 40 °C):  $t_R$  (major) = 10.5 min,  $t_R$  (minor) = 13.3 min.  $[\alpha]_D^{30} = 25.1$  ( $c$  1.6, CHCl<sub>3</sub>). <sup>1</sup>H NMR (400 MHz, CDCl<sub>3</sub>)  $\delta$  7.35 – 7.32 (m, 4H), 7.29 – 7.21 (m, 2H), 5.45 – 5.34 (m, 1H), 3.68 (d,  $J = 10.9$  Hz, 3H), 3.39 (d,  $J = 11.0$  Hz, 3H), 2.40 – 2.28 (m, 2H), 2.02 (s, 3H); <sup>13</sup>C NMR (101 MHz, CDCl<sub>3</sub>)  $\delta$  169.5, 141.1 (d,  $J_{C-p} = 8.4$  Hz), 128.6, 127.5, 126.1, 52.4 (d,  $J_{C-p} = 6.6$  Hz), 52.2 (d,  $J_{C-p} = 6.6$  Hz), 48.3 (d,  $J_{C-p} = 4.7$  Hz), 31.6 (d,  $J_{C-p} = 138.6$  Hz), 23.3; <sup>31</sup>P NMR (162 MHz, CDCl<sub>3</sub>)  $\delta$  30.2.

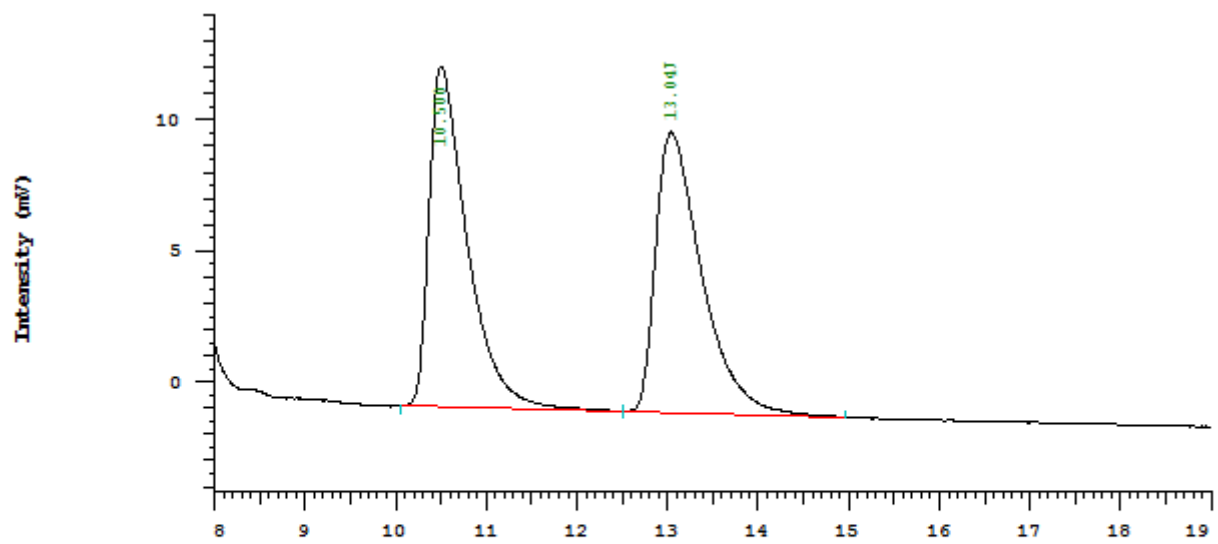

| No. | RT     | Area   | Conc 1  |
|-----|--------|--------|---------|
| 1   | 10.500 | 381027 | 50.057  |
| 2   | 13.047 | 380158 | 49.943  |
|     |        |        | 100.000 |

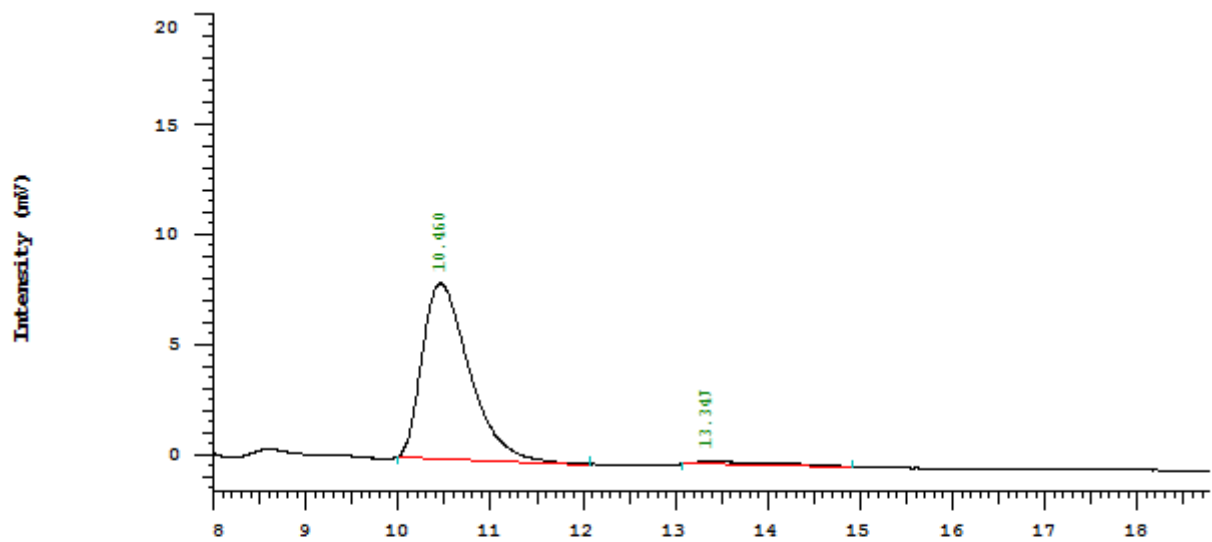

| No. | RT     | Area   | Conc 1  |
|-----|--------|--------|---------|
| 1   | 10.460 | 279035 | 97.002  |
| 2   | 13.347 | 8624   | 2.998   |
|     |        |        | 100.000 |

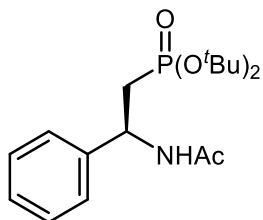

2I

**di-tert-butyl (S)-(2-acetamido-2-phenylethyl)phosphonate (2I).** 43.9 mg (99% yield)

of **2I** was obtained as a white solid after purification with column chromatography on silica gel (hexanes/EtOAc/methanol, 2/1/0.1). M.p.: 148 – 150 °C. >99% ee was determined by chiral HPLC (Chiralcel OD-H, *n*-hexane/*i*-PrOH = 85/15, 0.8 mL/min, 254 nm, 40 °C):  $t_R$  (major) = 5.4 min,  $t_R$  (minor) = 4.5 min.  $[\alpha]_D^{30} = 30.9$  (*c* 1.8, CHCl<sub>3</sub>). <sup>1</sup>H NMR (400 MHz, CDCl<sub>3</sub>) δ 7.34 – 7.27 (m, 4H), 7.25 – 7.20 (m, 1H), 7.18– 7.16 (m, 1H), 1H), 5.29 – 5.19 (m, 1H), 2.18 (dd, *J* = 16.9, 6.7 Hz, 2H), 2.03 (s, 3H), 1.51 (s, 9H), 1.32 (s, 9H); <sup>13</sup>C NMR (101 MHz, CDCl<sub>3</sub>) δ 169.5, 142.0 (d,  $J_{C-p} = 9.9$  Hz), 128.5, 127.1, 126.1, 82.9 (d,  $J_{C-p} = 8.8$  Hz), 82.5 (d,  $J_{C-p} = 8.9$  Hz), 49.7 (d,  $J_{C-p} = 5.8$  Hz), 36.6 (d,  $J_{C-p} = 142.1$  Hz), 30.4 (d,  $J_{C-p} = 4.0$  Hz), 30.2 (d,  $J_{C-p} = 4.0$  Hz), 23.3; <sup>31</sup>P NMR (162 MHz, CDCl<sub>3</sub>) δ 19.1. HRMS calc. for C<sub>18</sub>H<sub>31</sub>NO<sub>4</sub>P [M+H]<sup>+</sup>: 356.1995, found: 356.1995.

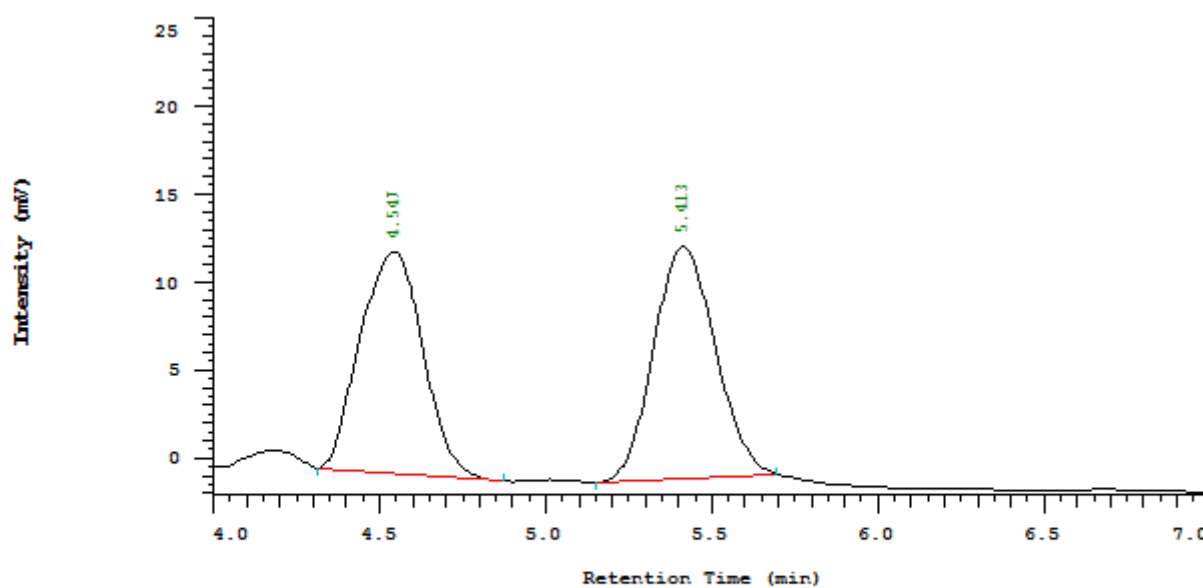

| No. | RT    | Area   | Conc 1 |
|-----|-------|--------|--------|
| 1   | 4.547 | 165306 | 49.388 |
| 2   | 5.413 | 169405 | 50.612 |

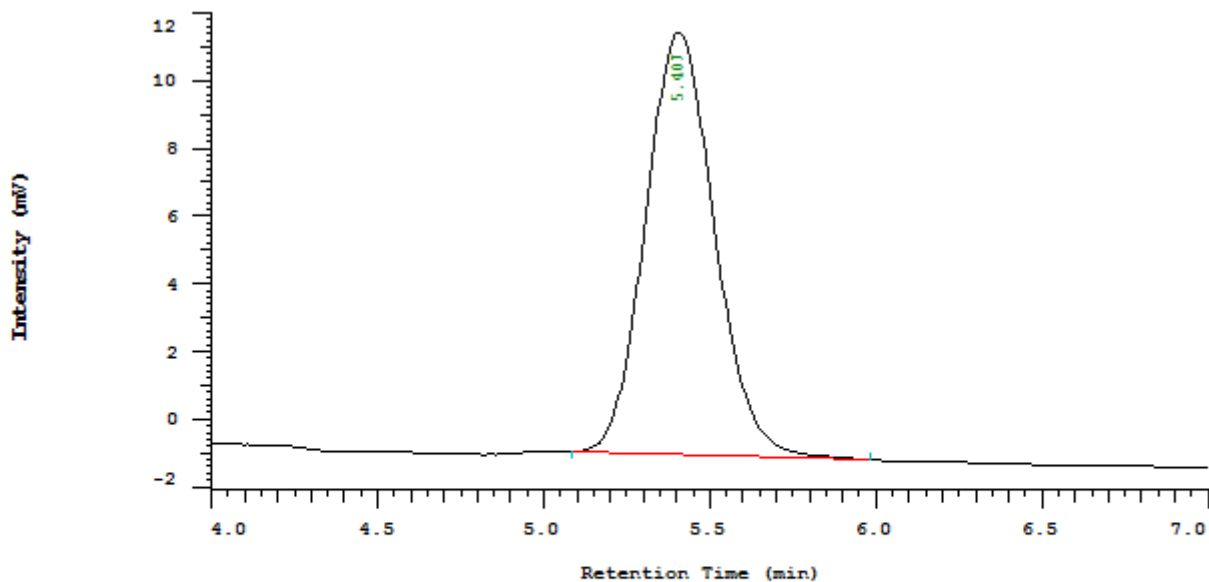

| No. | RT    | Area   | Conc 1  |
|-----|-------|--------|---------|
| 1   | 5.407 | 180742 | 100.000 |
|     |       | 180742 | 100.000 |

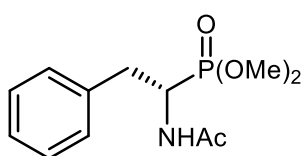

**4a**

**dimethyl (S)-(1-acetamido-2-phenylethyl)phosphonate (4a).**<sup>[4]</sup> 33.5 mg (99%

yield) of **4a** was obtained as colorless oil after purification with column chromatography on silica gel (hexanes/EtOAc/methanol, 1/1/0.2). >95% ee was determined by chiral HPLC (Chiralpak AD-H, *n*-hexane/*i*-PrOH = 95/5, 0.8 mL/min, 220 nm, 40 °C):  $t_R$  (major) = 22.7 min,  $t_R$  (minor) = 20.6 min.  $[\alpha]_D^{20} = 13.8$  (*c* 1.2, CH<sub>2</sub>Cl<sub>2</sub>). <sup>1</sup>H NMR (400 MHz, CDCl<sub>3</sub>) δ 7.31 – 7.19 (m, 5H), 6.65 (d, *J* = 9.8 Hz, 1H), 4.86 – 4.72 (m, 1H), 3.75 (d, *J* = 10.7 Hz, 6H), 3.25 – 3.10 (m, 1H), 2.98 – 2.89 (m, 1H), 1.89 (d, *J* = 0.6 Hz, 3H); <sup>13</sup>C NMR (101 MHz, CDCl<sub>3</sub>) δ 169.8 (d,  $J_{C-p} = 4.9$  Hz), 136.5 (d,  $J_{C-p} = 13.3$  Hz), 129.1, 128.4, 126.9, 53.5 (d,  $J_{C-p} = 6.9$  Hz), 52.9 (d,  $J_{C-p} = 6.9$  Hz), 45.7 (d,  $J_{C-p} = 156.3$  Hz), 35.5 (d, *J* = 3.3 Hz), 22.8; <sup>31</sup>P NMR (162 MHz, CDCl<sub>3</sub>) δ 26.8.

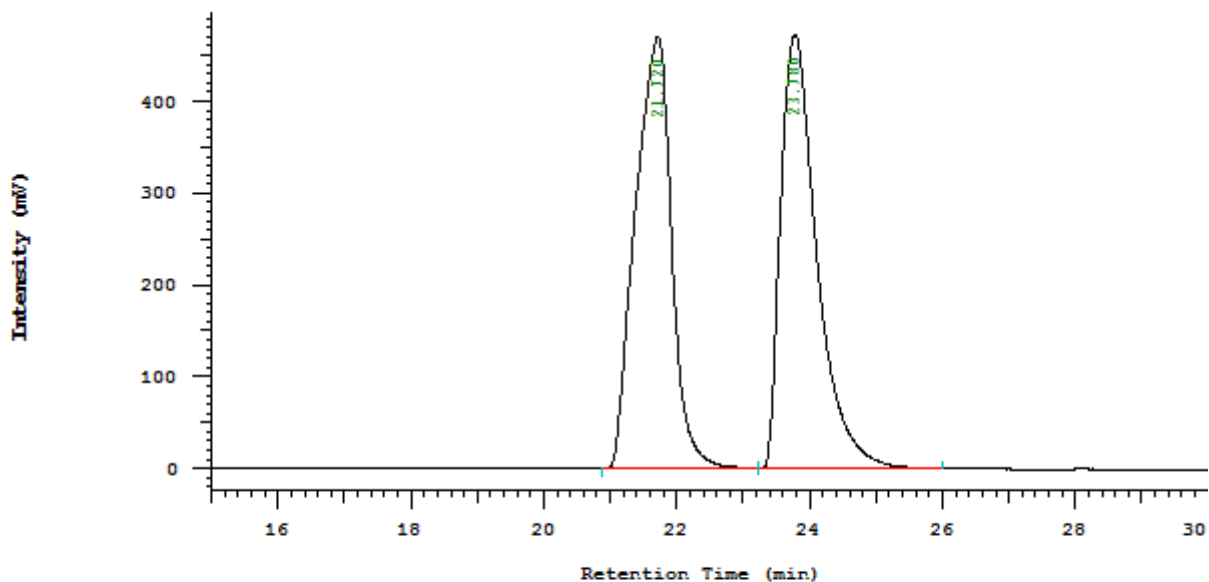

| No. | RT     | Area     | Conc 1  |
|-----|--------|----------|---------|
| 1   | 21.720 | 17840172 | 49.872  |
| 2   | 23.780 | 17931500 | 50.128  |
|     |        |          | 100.000 |

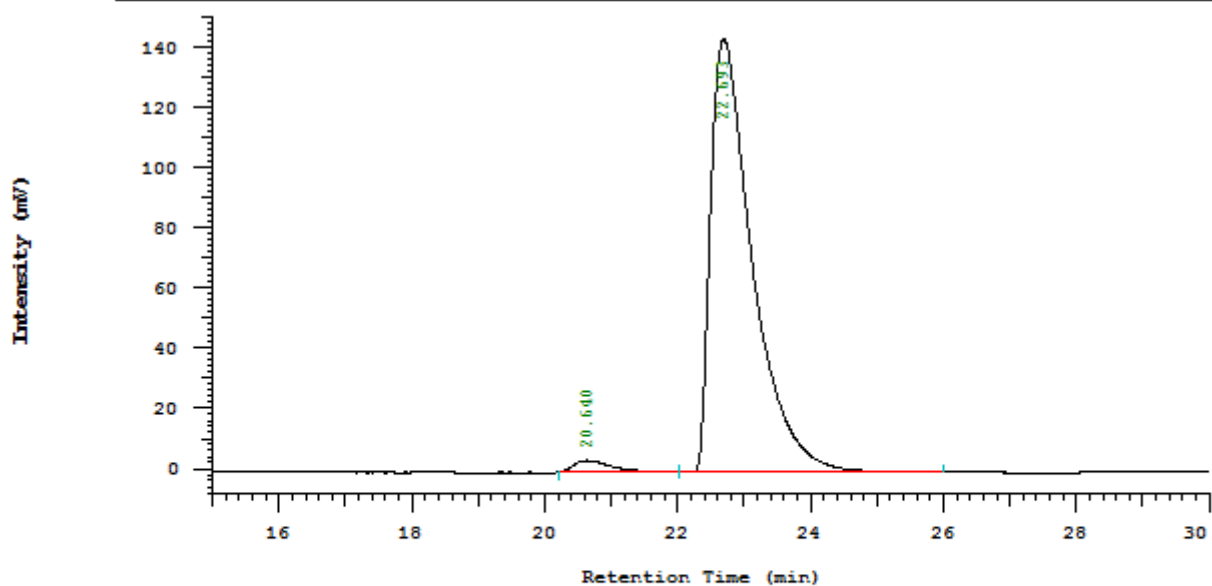

| No. | RT     | Area    | Conc 1  |
|-----|--------|---------|---------|
| 1   | 20.640 | 157852  | 2.447   |
| 2   | 22.693 | 6294001 | 97.553  |
|     |        |         | 100.000 |

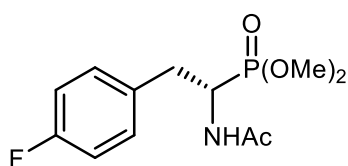

**4b**

**dimethyl (S)-(1-acetamido-2-(4-fluorophenyl)ethyl)phosphonate (4b).** >35.8

mg (>99% yield) of **4b** was obtained as colorless oil after purification with column chromatography on silica

gel (hexanes/EtOAc/methanol, 1/1/0.1). 97% ee (*E*-**3b**), 35% ee (*Z*-**3b**), 92% ee (*E*-**3b**/*Z*-**3b** = 10/1) and 35% ee (*E*-**3b**/*Z*-**3b** = 1/1) were determined by chiral HPLC (Chiralpak AD-H, *n*-hexane/*i*-PrOH = 95/5, 0.8 mL/min, 220 nm, 40 °C):  $t_R$  (major) = 26.4 min,  $t_R$  (minor) = 20.0 min.  $[\alpha]_D^{20} = 28.6$  (*c* 3.5, CH<sub>2</sub>Cl<sub>2</sub>) (*E*-**3b**);  $[\alpha]_D^{20} = -0.2$  (*c* 3.3, CH<sub>2</sub>Cl<sub>2</sub>) (*Z*-**3b**);  $[\alpha]_D^{30} = 26.5$  (*c* 3.7, CH<sub>2</sub>Cl<sub>2</sub>) (*E*-**3b**/*Z*-**3b** = 10/1);  $[\alpha]_D^{30} = 1.2$  (*c* 3.2, CH<sub>2</sub>Cl<sub>2</sub>) (*E*-**3b**/*Z*-**3b** = 1/1). <sup>1</sup>H NMR (400 MHz, CDCl<sub>3</sub>) δ 7.22 – 7.18 (m, 2H), 7.00 – 6.95 (m, 2H), 6.78 (d, *J* = 9.9 Hz, 1H), 4.80 – 4.70 (m, 1H), 3.76 (dd, *J* = 10.7, 3.5 Hz, 6H), 3.19 – 3.12 (m, 1H), 2.95 – 2.86 (m, 1H), 1.90 (d, *J* = 1.0 Hz, 3H); <sup>13</sup>C NMR (101 MHz, CDCl<sub>3</sub>) δ 169.9 (d, *J* = 5.1 Hz), 161.8 (d, *J*<sub>C-f</sub> = 245.0 Hz), 132.2 (dd, *J* = 13.6, 3.3 Hz), 130.6 (d, *J* = 8.0 Hz), 115.3 (d, *J* = 21.3 Hz), 53.6 (d, *J*<sub>C-p</sub> = 6.9 Hz), 52.9 (d, *J*<sub>C-p</sub> = 7.0 Hz), 45.7 (d, *J*<sub>C-p</sub> = 156.2 Hz), 34.7 (d, *J*<sub>C-p</sub> = 3.4 Hz), 22.7; <sup>31</sup>P NMR (162 MHz, CDCl<sub>3</sub>) δ 26.6. HRMS calc. for C<sub>12</sub>H<sub>18</sub>FNO<sub>4</sub>P [M+H]<sup>+</sup>: 290.0952, found: 290.0956.

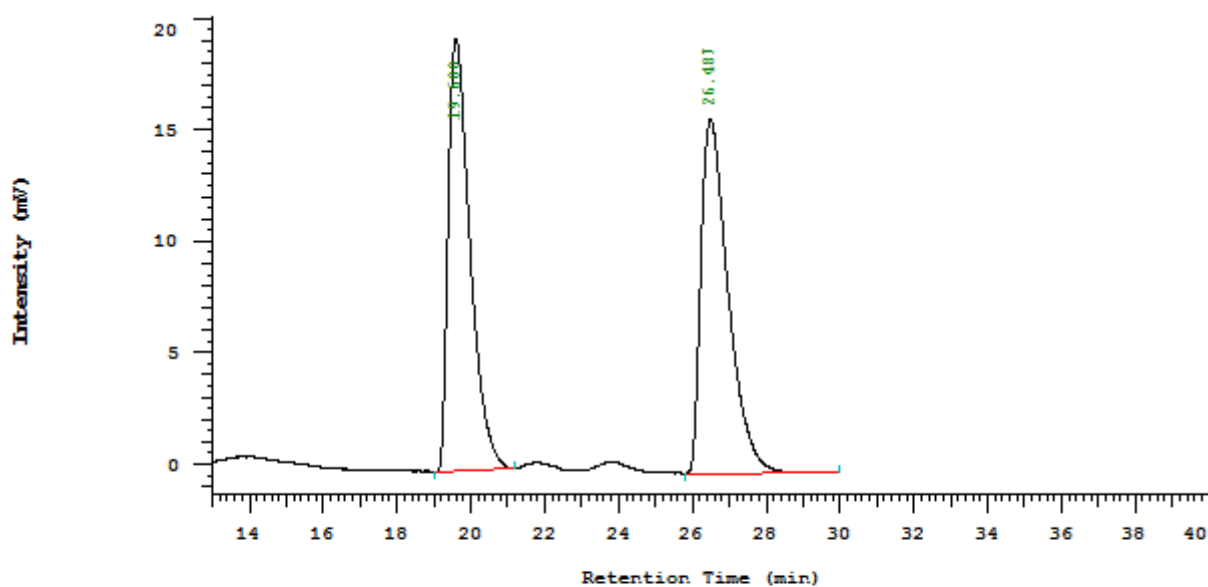

| No. | RT     | Area    | Conc 1  |
|-----|--------|---------|---------|
| 1   | 19.600 | 795448  | 49.532  |
| 2   | 26.487 | 810464  | 50.468  |
|     |        | 1605912 | 100.000 |

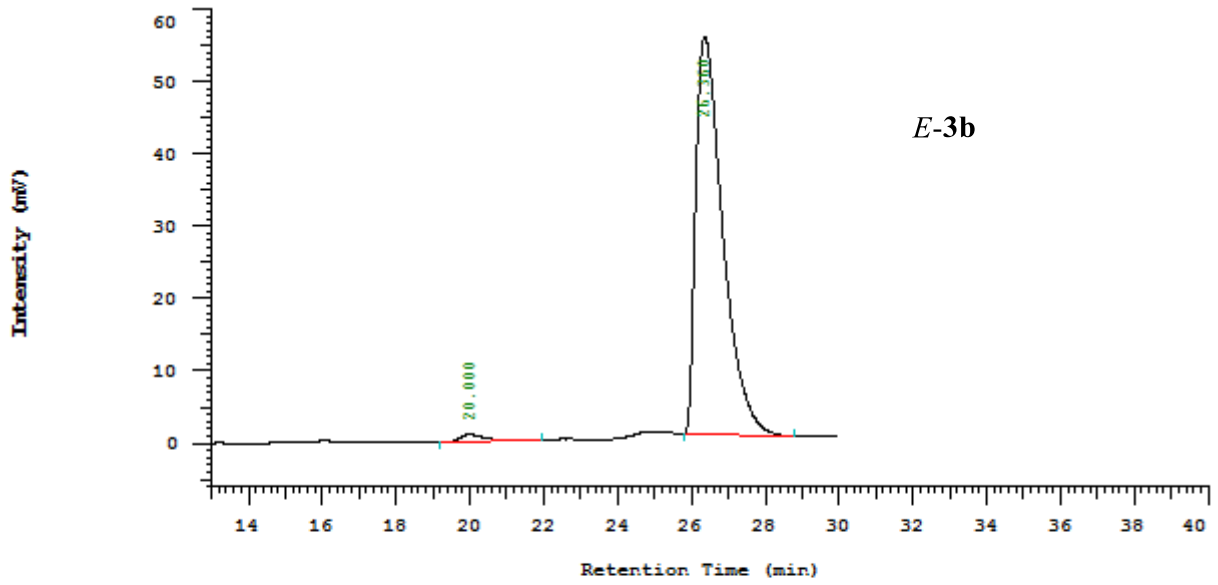

E-3b

| No. | RT     | Area    | Conc 1  |
|-----|--------|---------|---------|
| 1   | 20.000 | 46220   | 1.623   |
| 2   | 26.360 | 2801795 | 98.377  |
|     |        |         | 100.000 |

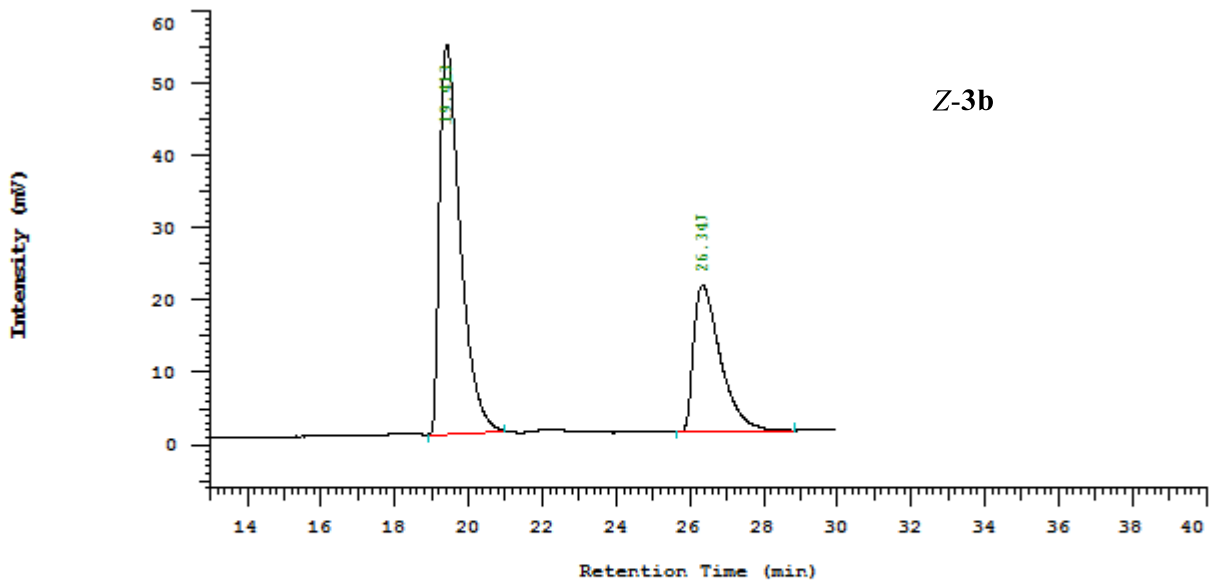

Z-3b

| No. | RT     | Area    | Conc 1  |
|-----|--------|---------|---------|
| 1   | 19.413 | 2098356 | 67.277  |
| 2   | 26.347 | 1020617 | 32.723  |
|     |        |         | 100.000 |



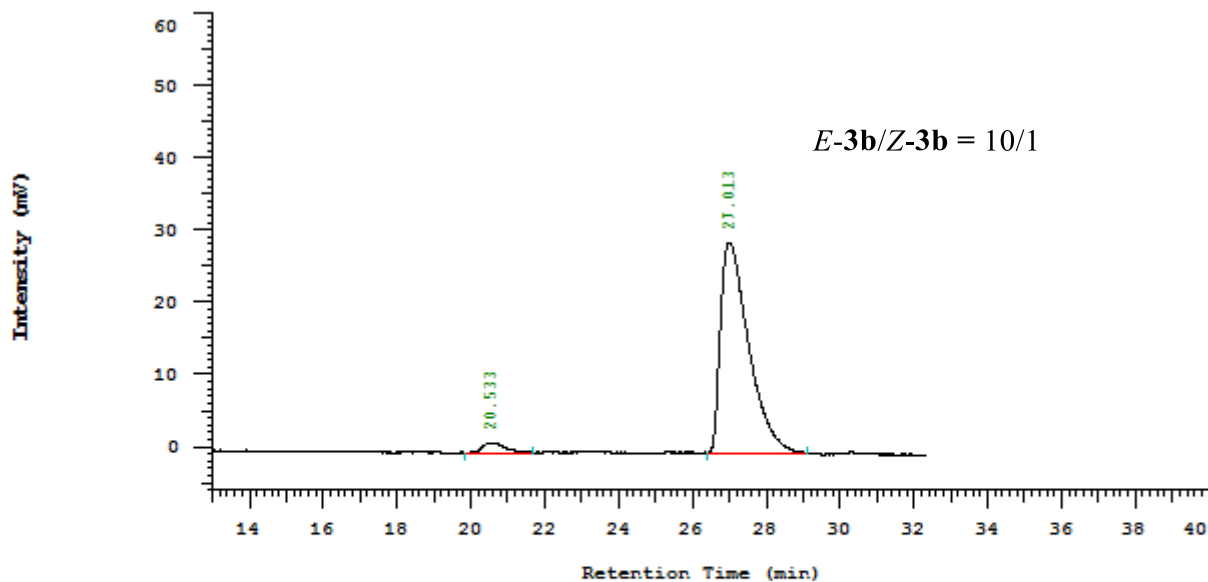

| No. | RT     | Area    | Conc 1  |
|-----|--------|---------|---------|
| 1   | 20.533 | 61942   | 3.839   |
| 2   | 27.013 | 1551640 | 96.161  |
|     |        | 1613582 | 100.000 |

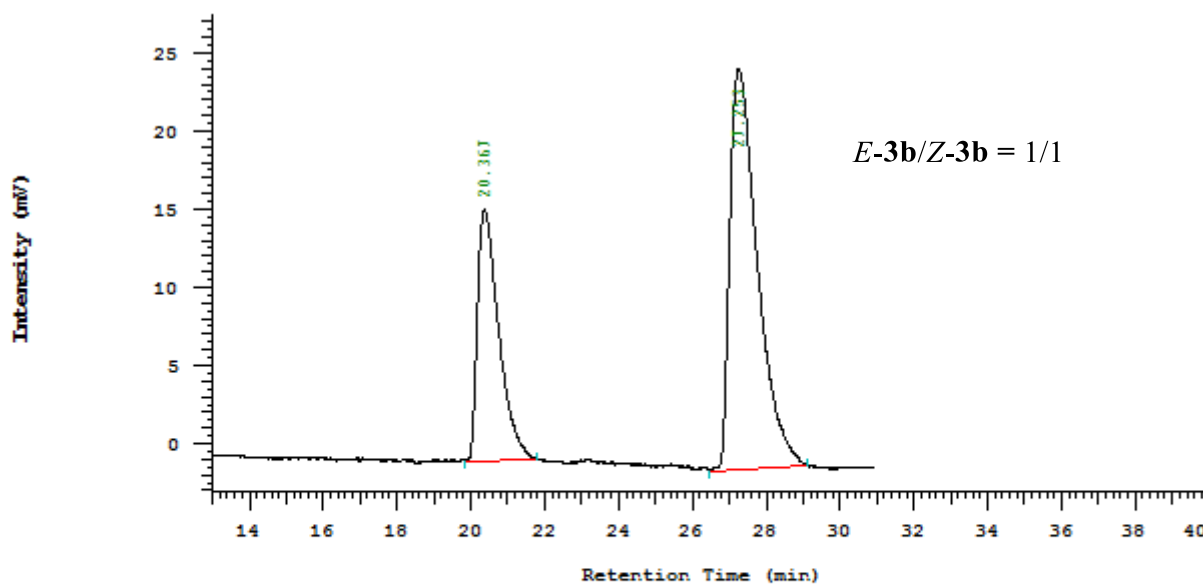

| No. | RT     | Area    | Conc 1  |
|-----|--------|---------|---------|
| 1   | 20.367 | 644990  | 32.654  |
| 2   | 27.253 | 1330250 | 67.346  |
|     |        | 1975240 | 100.000 |

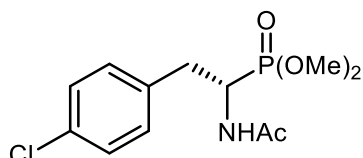

**4c**

**dimethyl (*S*)-1-acetamido-2-(4-chlorophenyl)ethylphosphonate (**4c**). 38.1**

mg (99% yield) of **4c** was obtained as colorless oil after purification with column chromatography on silica gel (hexanes/EtOAc/methanol, 1/1/0.1). 96% ee was determined by chiral HPLC (Chiralpak AD-H, *n*-hexane/*i*-PrOH = 95/5, 0.8 mL/min, 220 nm, 40 °C):  $t_R$  (major) = 29.6 min,  $t_R$  (minor) = 22.5 min.  $[\alpha]_D^{20} = 22.6$  (*c* 1.5, CH<sub>2</sub>Cl<sub>2</sub>). <sup>1</sup>H NMR (400 MHz, CDCl<sub>3</sub>) δ 7.27 – 7.24 (m, 2H), 7.18 – 7.15 (m, 2H), 6.39 (d, *J* = 9.9 Hz, 1H), 4.82 – 4.71 (m, 1H), 3.76 (dd, *J* = 10.7, 5.3 Hz, 6H), 3.20 – 3.13 (m, 1H), 2.94 – 2.85 (m, 1H), 1.90 (d, *J* = 0.6 Hz, 3H); <sup>13</sup>C NMR (101 MHz, CDCl<sub>3</sub>) δ 169.7 (d, *J*<sub>C-p</sub> = 5.0 Hz), 135.0 (d, *J*<sub>C-p</sub> = 13.3 Hz), 132.8, 130.4, 128.6, 53.5 (d, *J*<sub>C-p</sub> = 6.9 Hz), 52.9 (d, *J*<sub>C-p</sub> = 6.9 Hz), 45.4 (d, *J*<sub>C-p</sub> = 156.4 Hz), 34.9 (d, *J*<sub>C-p</sub> = 3.5 Hz), 22.8; <sup>31</sup>P NMR (162 MHz, CDCl<sub>3</sub>) δ 26.4. HRMS calc. for C<sub>12</sub>H<sub>18</sub>ClNO<sub>4</sub>P [M+H]<sup>+</sup>: 306.0656, found: 306.0661.

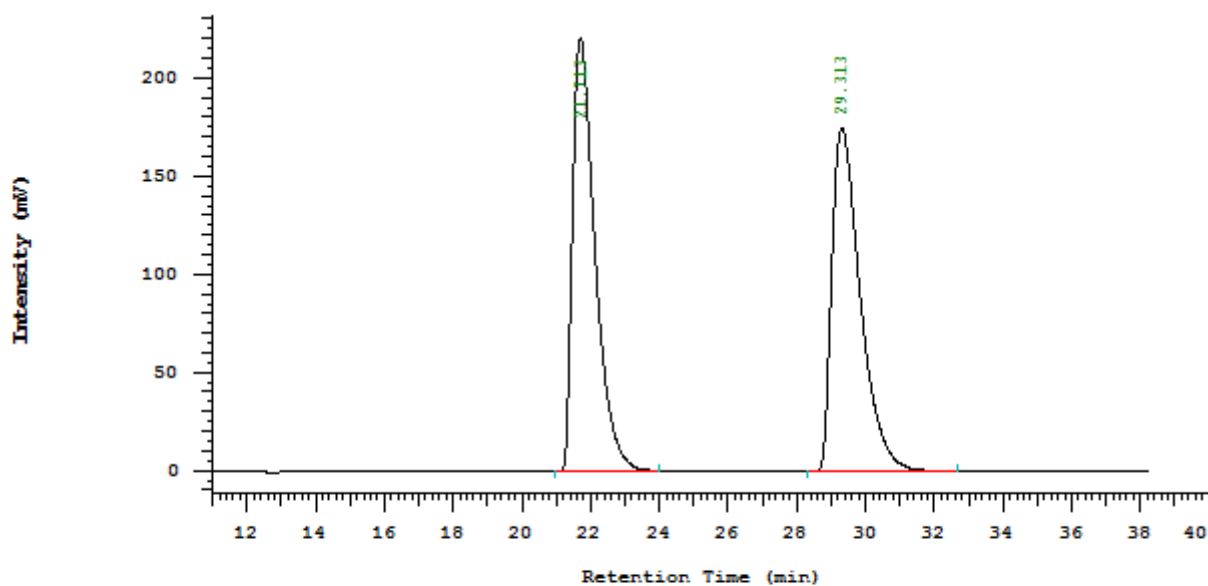

| No. | RT     | Area     | Conc 1  |
|-----|--------|----------|---------|
| 1   | 21.713 | 10010366 | 49.925  |
| 2   | 29.313 | 10040403 | 50.075  |
|     |        | 20050769 | 100.000 |

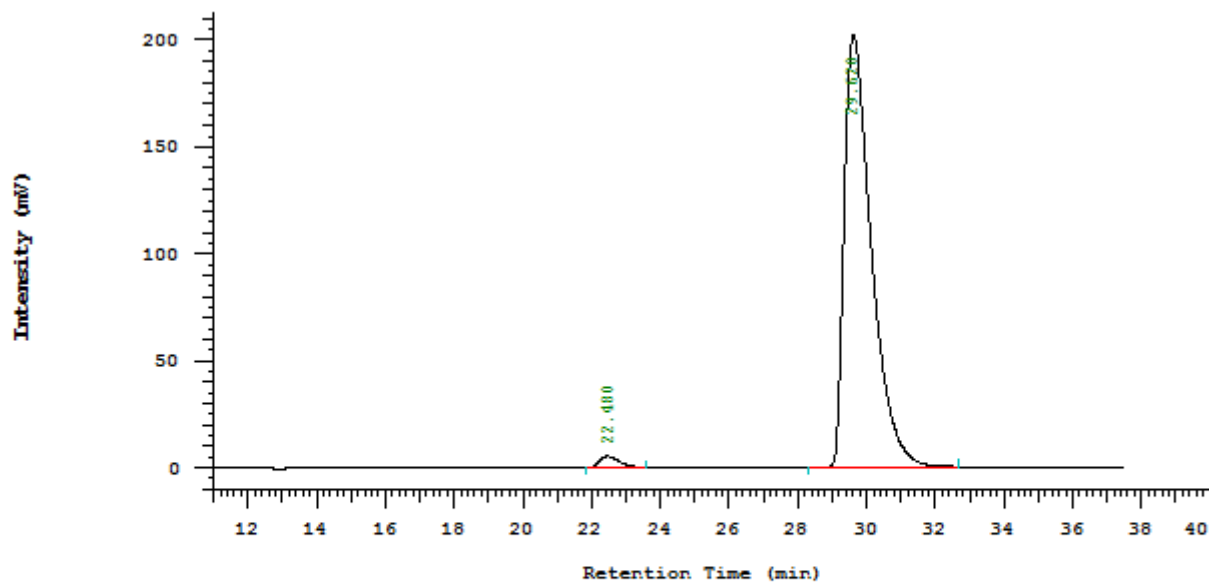

| No. | RT     | Area     | Conc 1  |
|-----|--------|----------|---------|
| 1   | 22.480 | 222705   | 1.973   |
| 2   | 29.620 | 11062199 | 98.027  |
|     |        | 11284904 | 100.000 |

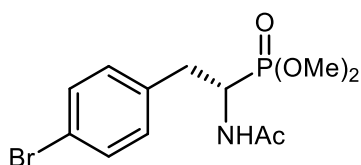

**4d**

**dimethyl (S)-1-acetamido-2-(4-bromophenyl)ethylphosphonate (4d).** 43.3

mg (>99% yield) of **4d** was obtained as colorless oil after purification with column chromatography on silica gel (hexanes/EtOAc/methanol, 1/1/0.1). 97% ee was determined by chiral HPLC (Chiralpak AD-H, *n*-hexane/*i*-PrOH = 80/20, 0.8 mL/min, 254 nm, 40 °C):  $t_R$  (major) = 50.9 min,  $t_R$  (minor) = 38.3 min.  $[\alpha]_D^{20} = 27.0$  ( $c$  1.0,  $\text{CH}_2\text{Cl}_2$ ).  $^1\text{H}$  NMR (400 MHz,  $\text{CDCl}_3$ )  $\delta$  7.41 (d,  $J = 8.3$  Hz, 2H), 7.11 (d,  $J = 8.3$  Hz, 2H), 6.45 (d,  $J = 9.9$  Hz, 1H), 4.81 – 4.71 (m, 1H), 3.76 (dd,  $J = 10.7, 5.5$  Hz, 6H), 3.18 – 3.11 (m, 1H), 2.92 – 2.84 (m, 1H), 1.91 (s, 3H);  $^{13}\text{C}$  NMR (101 MHz,  $\text{CDCl}_3$ )  $\delta$  169.7 (d,  $J_{\text{C-P}} = 4.9$  Hz), 135.5 (d,  $J_{\text{C-P}} = 13.3$  Hz), 131.5, 130.8, 120.9, 53.5 (d,  $J_{\text{C-P}} = 7.0$  Hz), 52.9 (d,  $J_{\text{C-P}} = 6.8$  Hz), 45.3 (d,  $J_{\text{C-P}} = 156.5$  Hz), 35.0 (d,  $J_{\text{C-P}} = 3.4$  Hz), 22.8;  $^{31}\text{P}$  NMR (162 MHz,  $\text{CDCl}_3$ )  $\delta$  26.4. HRMS calc. for  $\text{C}_{12}\text{H}_{18}\text{BrNO}_4\text{P}$   $[\text{M}+\text{H}]^+$ : 350.0151, found: 350.0156.

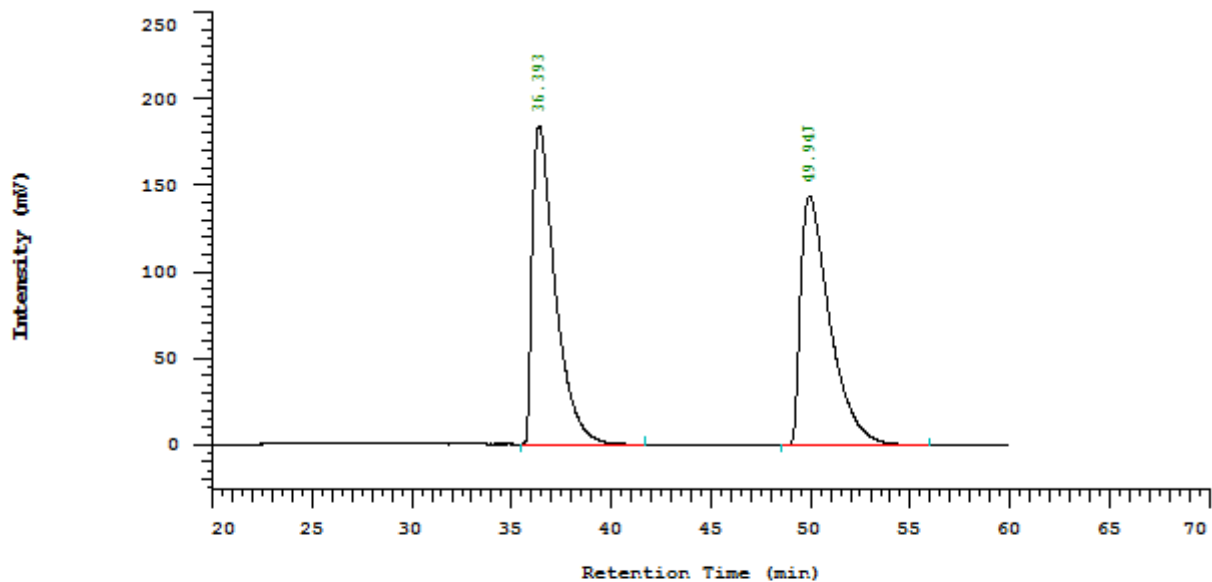

| No. | RT     | Area     | Conc 1  |
|-----|--------|----------|---------|
| 1   | 36.393 | 14619170 | 50.110  |
| 2   | 49.947 | 14554735 | 49.890  |
|     |        | 29173905 | 100.000 |

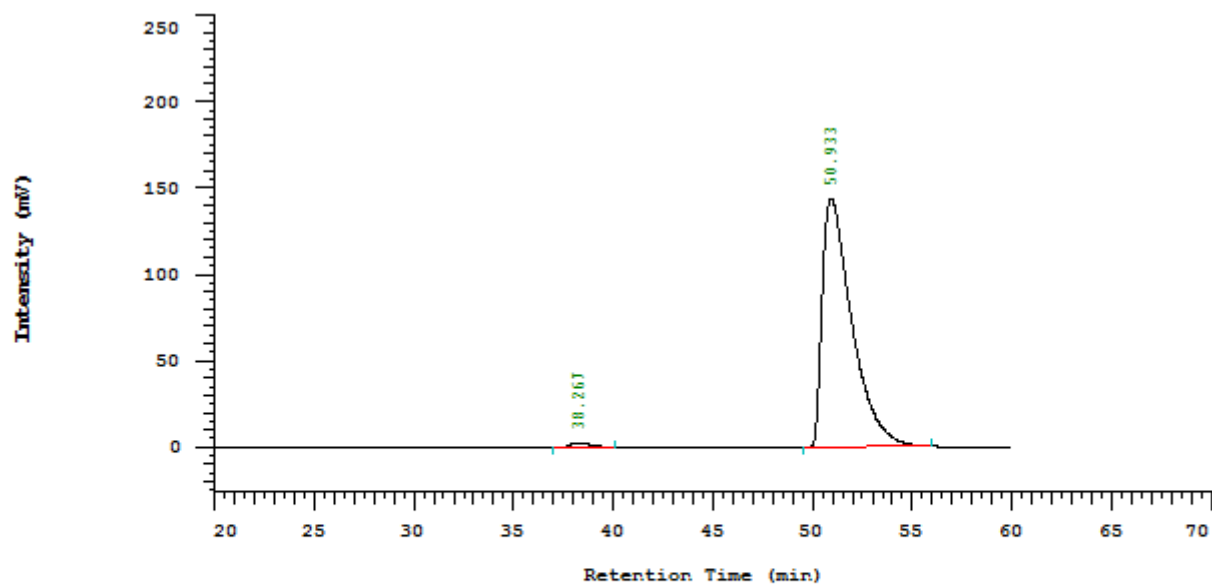

| No. | RT     | Area     | Conc 1  |
|-----|--------|----------|---------|
| 1   | 38.267 | 213050   | 1.427   |
| 2   | 50.933 | 14713550 | 98.573  |
|     |        | 14926600 | 100.000 |

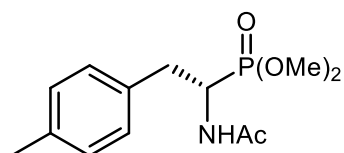

**4e**

**dimethyl (*S*)-(1-acetamido-2-(*p*-tolyl)ethyl)phosphonate (**4e**).** 35.5 mg (>99%

yield) of **4e** was obtained as colorless oil after purification with column chromatography on silica gel (hexanes/EtOAc/methanol, 1/1/0.1). 96% ee was determined by chiral HPLC (Chiralpak AD-H, *n*-hexane/*i*-PrOH = 95/5, 0.8 mL/min, 220 nm, 40 °C):  $t_R$  (major) = 38.9 min,  $t_R$  (minor) = 35.1 min.  $[\alpha]_D^{20} = 29.3$  (*c* 2.1, CH<sub>2</sub>Cl<sub>2</sub>). <sup>1</sup>H NMR (400 MHz, CDCl<sub>3</sub>) δ 7.12 – 7.07 (m, 4H), 6.30 (d, *J* = 9.8 Hz, 1H), 4.82 – 4.72 (m, 1H), 3.75 (dd, *J* = 10.6, 3.0 Hz, 6H), 3.20 – 3.13 (m, 1H), 2.92 – 2.83 (m, 1H), 2.30 (s, 3H), 1.89 (s, 3H); <sup>13</sup>C NMR (101 MHz, CDCl<sub>3</sub>) δ 169.7 (d, *J*<sub>C-p</sub> = 4.9 Hz), 133.3 (d, *J*<sub>C-p</sub> = 13.2 Hz), 136.4, 129.2, 128.9, 53.4 (d, *J*<sub>C-p</sub> = 7.0 Hz), 52.9 (d, *J*<sub>C-p</sub> = 6.9 Hz), 45.7 (d, *J*<sub>C-p</sub> = 155.8 Hz), 35.1 (d, *J*<sub>C-p</sub> = 3.2 Hz), 22.9, 21.1; <sup>31</sup>P NMR (162 MHz, CDCl<sub>3</sub>) δ 26.9. HRMS calc. for C<sub>13</sub>H<sub>21</sub>NO<sub>4</sub>P [M+H]<sup>+</sup>: 286.1203, found: 286.1206.

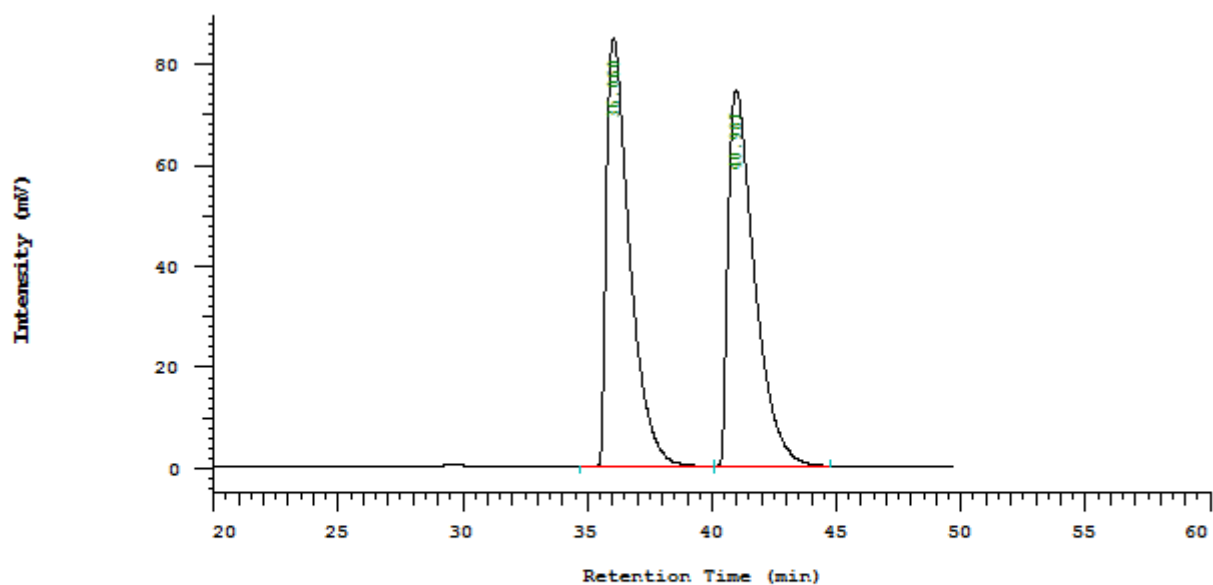

| No. | RT     | Area     | Conc 1  |
|-----|--------|----------|---------|
| 1   | 36.060 | 5484764  | 50.079  |
| 2   | 40.987 | 5467480  | 49.921  |
|     |        | 10952244 | 100.000 |

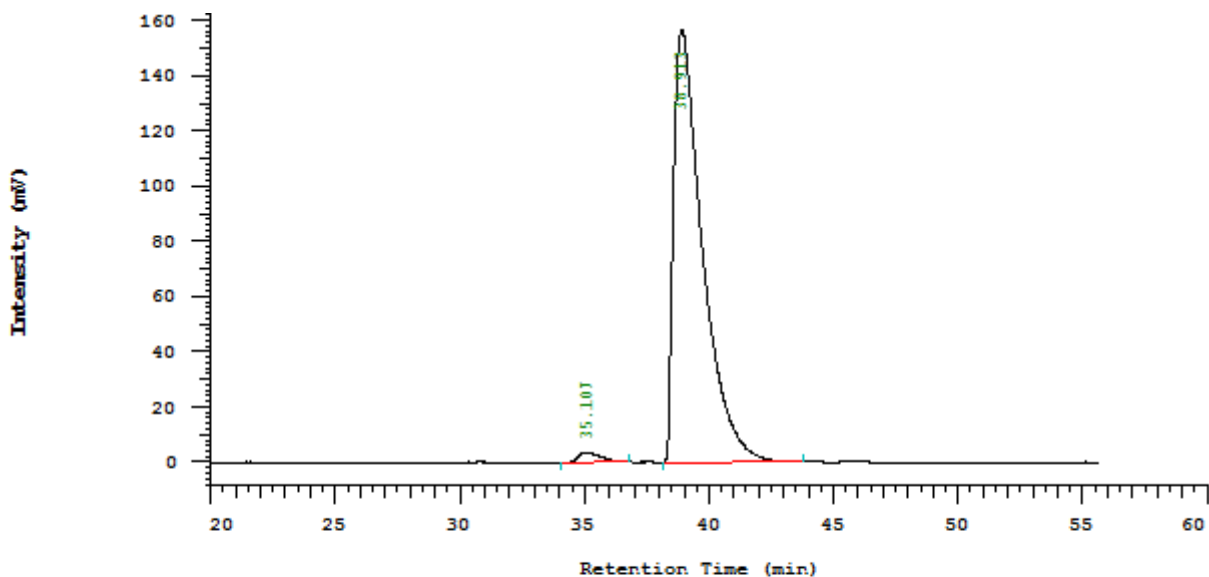

| No. | RT     | Area     | Conc 1  |
|-----|--------|----------|---------|
| 1   | 35.107 | 226529   | 1.768   |
| 2   | 38.913 | 12585378 | 98.232  |
|     |        | 12811907 | 100.000 |

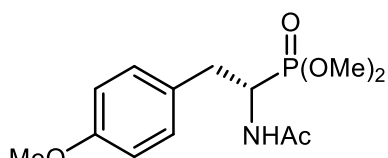

**4f**

**dimethyl (S)-(1-acetamido-2-(4-methoxyphenyl)ethyl)phosphonate (4f).**

34.5 mg (99% yield) of **4f** was obtained as colorless oil after purification with column chromatography on silica gel (hexanes/EtOAc/methanol, 1/1/0.1). 96% ee was determined by chiral HPLC (Chiralpak AD-H, *n*-hexane/*i*-PrOH = 90/10, 0.8 mL/min, 220 nm, 40 °C):  $t_R$  (major) = 19.5 min,  $t_R$  (minor) = 15.7 min.  $[\alpha]_D^{20}$  = 26.8 (*c* 1.7, CH<sub>2</sub>Cl<sub>2</sub>). <sup>1</sup>H NMR (400 MHz, CDCl<sub>3</sub>) δ 7.14 (d, *J* = 8.5 Hz, 2H), 6.82 (d, *J* = 8.5 Hz, 2H), 6.25 (d, *J* = 9.9 Hz, 1H), 4.80 – 4.70 (m, 1H), 3.78 (s, 3H), 3.75 (dd, *J* = 10.7, 3.5 Hz, 6H), 3.18 – 3.11 (m, 1H), 2.91 – 2.82 (m, 1H), 1.90 (s, 3H); <sup>13</sup>C NMR (101 MHz, CDCl<sub>3</sub>) δ 169.6 (d,  $J_{C-p}$  = 5.0 Hz), 158.5, 130.1, 128.3 (d,  $J_{C-p}$  = 13.1 Hz), 113.9, 55.2, 53.4 (d,  $J_{C-p}$  = 7.0 Hz), 52.9 (d,  $J_{C-p}$  = 6.8 Hz), 45.8 (d,  $J_{C-p}$  = 155.5 Hz), 34.7 (d,  $J_{C-p}$  = 3.2 Hz), 22.9; <sup>31</sup>P NMR (162 MHz, CDCl<sub>3</sub>) δ 26.9. HRMS calc. for C<sub>13</sub>H<sub>21</sub>NO<sub>5</sub>P [M+H]<sup>+</sup>: 302.1152, found: 302.1158.

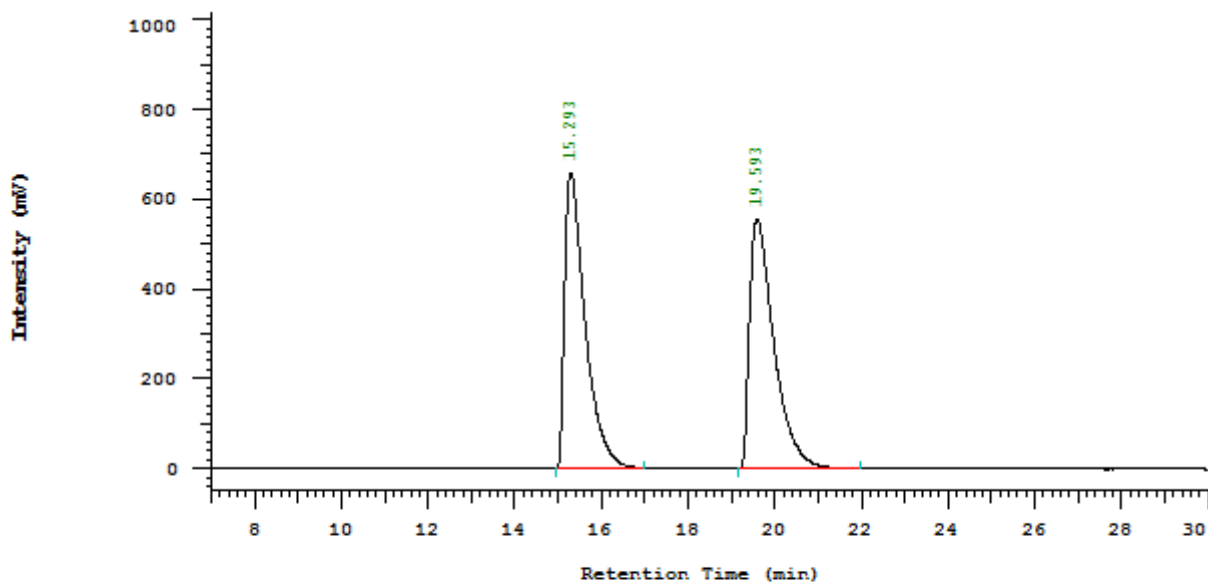

| No. | RT     | Area     | Conc 1  |
|-----|--------|----------|---------|
| 1   | 15.293 | 21667425 | 49.848  |
| 2   | 19.593 | 21799559 | 50.152  |
|     |        | 43466984 | 100.000 |

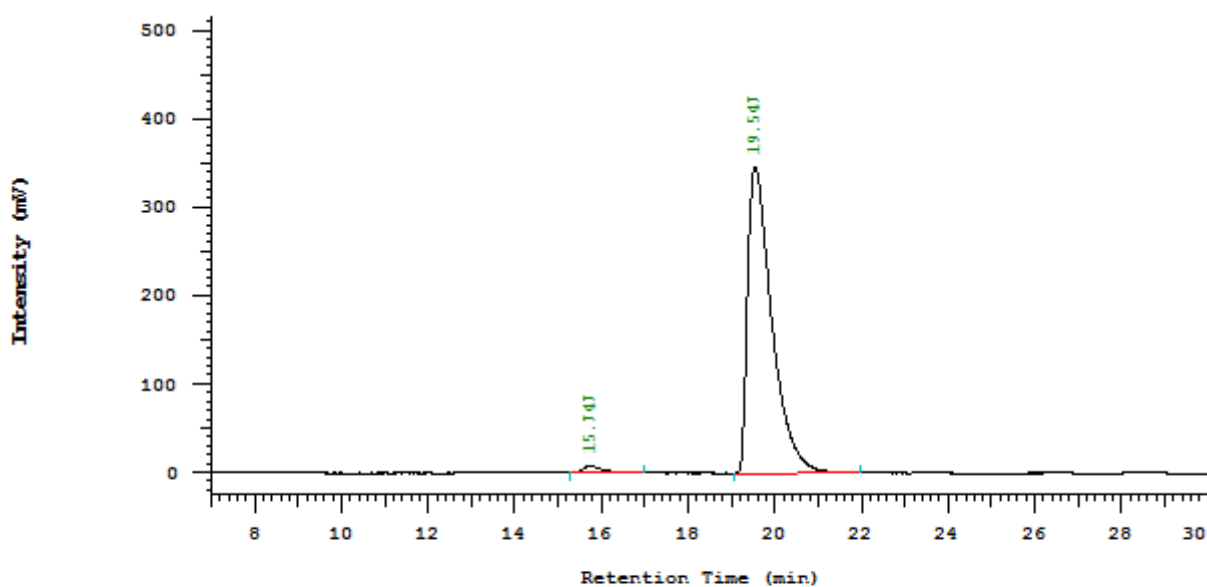

| No. | RT     | Area     | Conc 1  |
|-----|--------|----------|---------|
| 1   | 15.747 | 244220   | 1.783   |
| 2   | 19.547 | 13450058 | 98.217  |
|     |        | 13694278 | 100.000 |

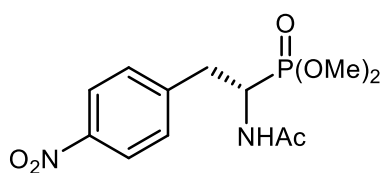

**4g**

**dimethyl (S)-(1-acetamido-2-(4-nitrophenyl)ethyl)phosphonate (4g). 37.7**

mg (96% yield) of **4g** was obtained as a white solid after purification with column chromatography on silica

gel (hexanes/EtOAc/methanol, 1/1/0.1). M.p.: 146 – 148 °C. >92% ee was determined by chiral HPLC (Chiralpak AD-H, *n*-hexane/*i*-PrOH = 80/20, 0.8 mL/min, 254 nm, 40 °C):  $t_R$  (major) = 12.1 min,  $t_R$  (minor) = 8.1 min.  $[\alpha]_D^{20} = 37.9$  (*c* 1.3, CH<sub>2</sub>Cl<sub>2</sub>). <sup>1</sup>H NMR (400 MHz, CDCl<sub>3</sub>) δ 8.15 (d, *J* = 8.6 Hz, 2H), 7.43 (d, *J* = 8.6 Hz, 2H), 6.69 (d, *J* = 9.8 Hz, 1H), 4.88 – 4.78 (m, 1H), 3.79 (t, *J* = 11.0 Hz, 6H), 3.32 – 3.25 (m, 1H), 3.08 – 2.99 (m, 1H), 1.91 (s, 3H); <sup>13</sup>C NMR (101 MHz, CDCl<sub>3</sub>) δ 169.8 (d, *J*<sub>C-p</sub> = 5.1 Hz), 147.1, 144.4 (d, *J*<sub>C-p</sub> = 13.8 Hz), 130.0, 123.6, 53.8 (d, *J*<sub>C-p</sub> = 7.0 Hz), 53.0 (d, *J*<sub>C-p</sub> = 7.1 Hz), 45.2 (d, *J*<sub>C-p</sub> = 157.4 Hz), 35.5 (d, *J*<sub>C-p</sub> = 3.7 Hz), 22.8; <sup>31</sup>P NMR (162 MHz, CDCl<sub>3</sub>) δ 25.8. HRMS calc. for C<sub>12</sub>H<sub>18</sub>N<sub>2</sub>O<sub>6</sub>P [M+H]<sup>+</sup>: 317.0897, found: 317.0899.

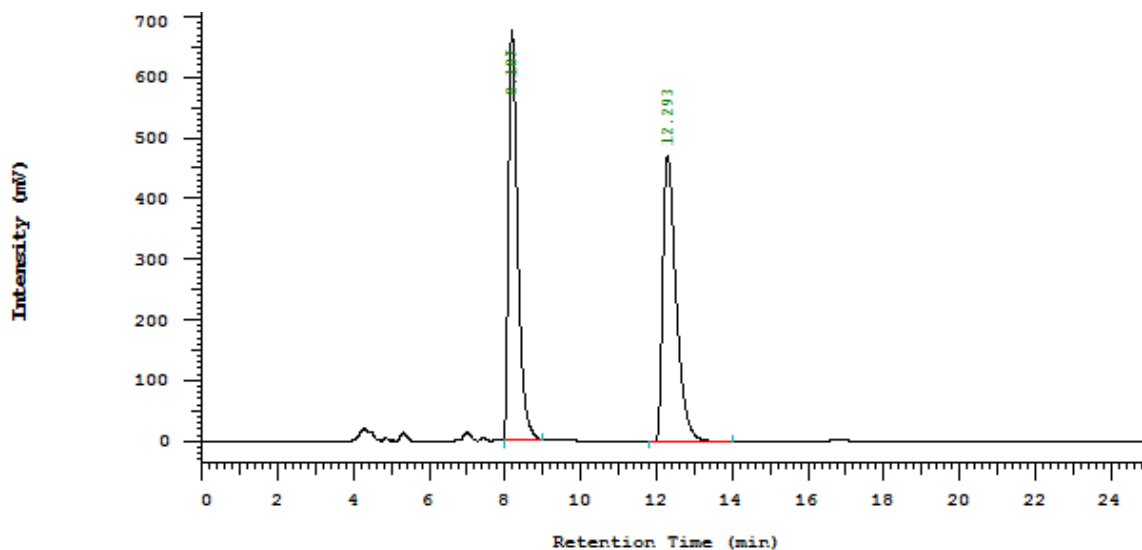

| No. | RT     | Area     | Conc 1  |
|-----|--------|----------|---------|
| 1   | 8.187  | 11400752 | 49.779  |
| 2   | 12.293 | 11501806 | 50.221  |
|     |        | 22902558 | 100.000 |



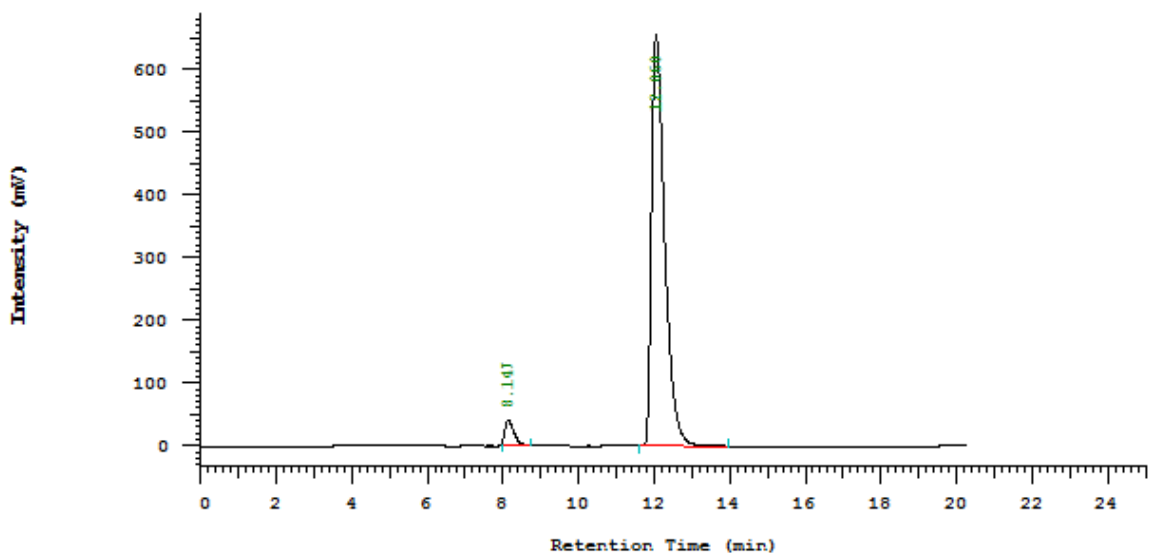

| No. | RT     | Area     | Conc 1  |
|-----|--------|----------|---------|
| 1   | 8.147  | 651047   | 3.961   |
| 2   | 12.060 | 15786295 | 96.039  |
|     |        | 16437342 | 100.000 |

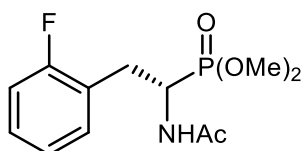

**4h**

**dimethyl (S)-1-acetamido-2-(2-fluorophenyl)ethylphosphonate (4h).** 35.9 mg

(99% yield) of **4h** was obtained as colorless oil after purification with column chromatography on silica gel (hexanes/EtOAc/methanol, 1/1/0.1). 97% ee was determined by chiral HPLC (Chiralpak AD-H, *n*-hexane/*i*-PrOH = 95/5, 0.8 mL/min, 220 nm, 40 °C):  $t_R$  (major) = 26.4 min,  $t_R$  (minor) = 23.7 min.  $[\alpha]_D^{20} = 25.6$  (*c* 1.7, CH<sub>2</sub>Cl<sub>2</sub>). <sup>1</sup>H NMR (400 MHz, CDCl<sub>3</sub>) δ 7.27 – 7.19 (m, 2H), 7.09 – 6.99 (m, 2H), 6.34 (d, *J* = 9.8 Hz, 1H), 4.83 – 4.72 (m, 1H), 3.78 (dd, *J* = 10.6, 8.4 Hz, 6H), 3.22 – 3.16 (m, 1H), 3.04 – 2.95 (m, 1H), 1.89 (s, 3H); <sup>13</sup>C NMR (101 MHz, CDCl<sub>3</sub>) δ 169.6 (d, *J*<sub>C-p</sub> = 4.9 Hz), 161.3 (d, *J*<sub>C-f</sub> = 244.7 Hz), 131.3 (d, *J* = 4.3 Hz), 128.8 (d, *J* = 8.2 Hz), 124.2 (d, *J* = 3.5 Hz), 123.9 – 123.3 (m), 115.2 (d, *J* = 22.2 Hz), 53.5 (d, *J*<sub>C-p</sub> = 7.0 Hz), 53.0 (d, *J*<sub>C-p</sub> = 6.8 Hz), 45.1 (d, *J*<sub>C-p</sub> = 156.4 Hz), 28.9 (dd, *J* = 4.0, 1.7 Hz). 22.8; <sup>31</sup>P NMR (162 MHz, CDCl<sub>3</sub>) δ 26.2. HRMS calc. for C<sub>12</sub>H<sub>18</sub>FNO<sub>4</sub>P [M+H]<sup>+</sup>: 290.0952, found: 290.0959.

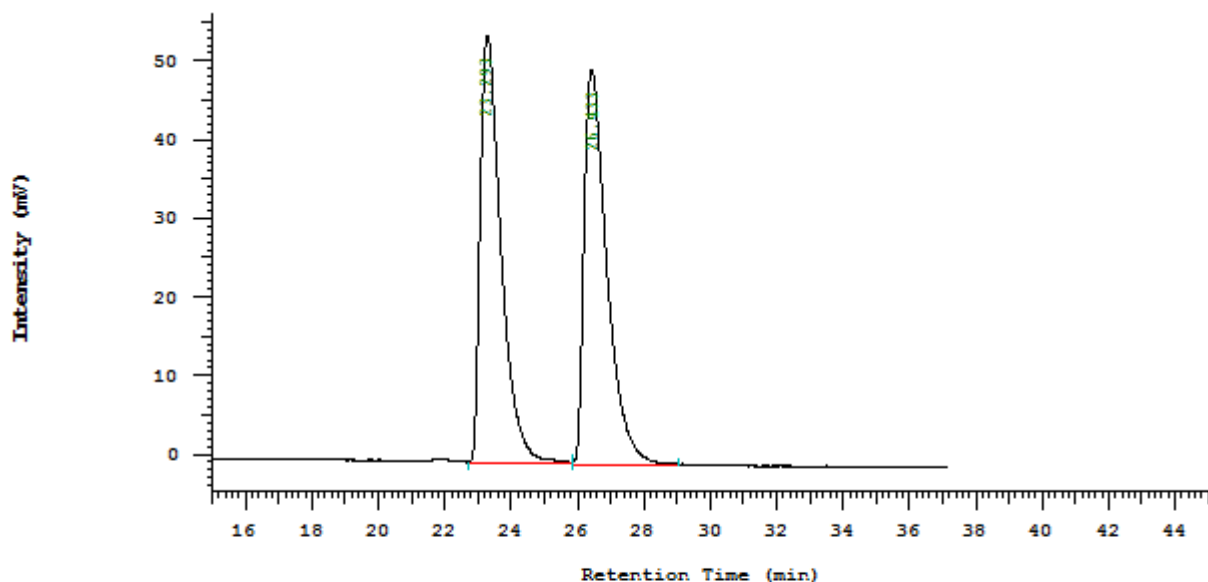

| No. | RT     | Area    | Conc 1  |
|-----|--------|---------|---------|
| 1   | 23.293 | 2373859 | 49.980  |
| 2   | 26.433 | 2375728 | 50.020  |
|     |        |         | 100.000 |
|     |        | 4749587 | 100.000 |

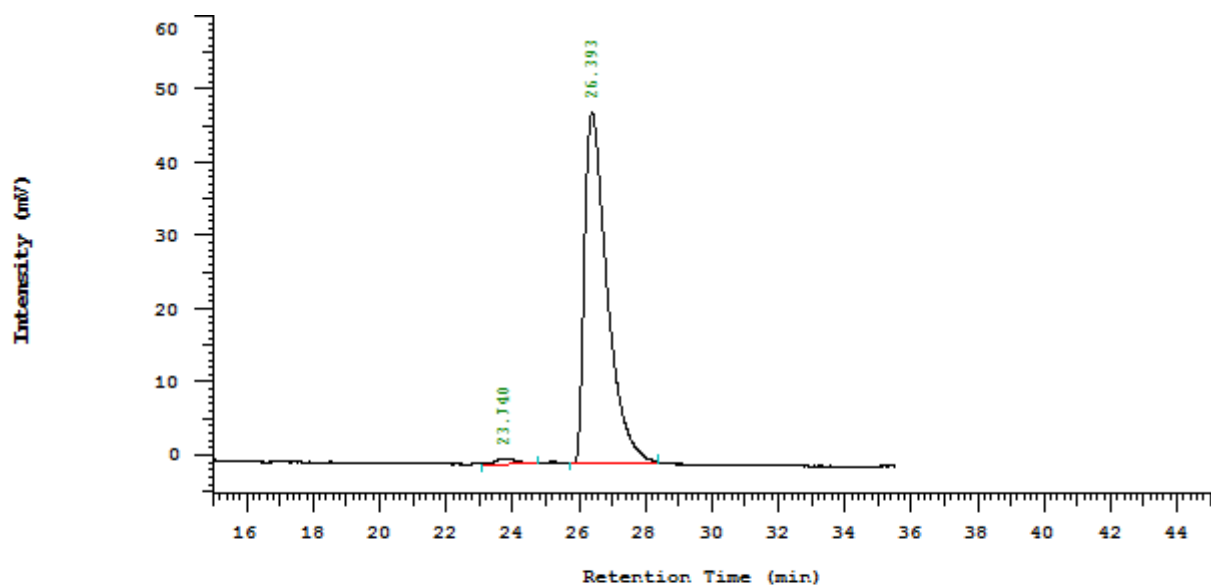

| No. | RT     | Area    | Conc 1  |
|-----|--------|---------|---------|
| 1   | 23.740 | 31439   | 1.377   |
| 2   | 26.393 | 2251619 | 98.623  |
|     |        |         | 100.000 |
|     |        | 2283058 | 100.000 |

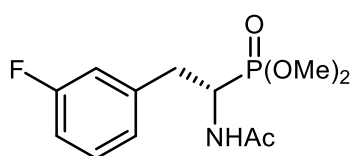

4i

dimethyl (*S*)-(1-acetamido-2-(3-fluorophenyl)ethyl)phosphonate (4i). 35.8

mg (99% yield) of 4i was obtained as colorless oil after purification with column chromatography on silica

gel (hexanes/EtOAc/methanol, 1/1/0.1). 96% ee was determined by chiral HPLC (Chiralpak AD-H, *n*-hexane/*i*-PrOH = 95/5, 0.8 mL/min, 220 nm, 40 °C):  $t_R$  (major) = 24.7 min,  $t_R$  (minor) = 21.6 min.  $[\alpha]_D^{20} = 29.9$  (*c* 2.0, CH<sub>2</sub>Cl<sub>2</sub>). <sup>1</sup>H NMR (400 MHz, CDCl<sub>3</sub>) δ 7.27 – 7.22 (m, 1H), 7.03 – 6.90 (m, 3H), 6.63 (d, *J* = 9.8 Hz, 1H), 4.82 – 4.72 (m, 1H), 3.77 (dd, *J* = 10.7, 8.3 Hz, 6H), 3.22 – 3.15 (m, 1H), 2.97 – 2.88 (m, 1H), 1.91 (d, *J* = 0.6 Hz, 3H); <sup>13</sup>C NMR (101 MHz, CDCl<sub>3</sub>) δ 169.8 (d, *J*<sub>C-p</sub> = 5.0 Hz), 162.7 (d, *J*<sub>C-f</sub> = 245.8 Hz), 139.1 (dd, *J* = 13.7, 7.4 Hz), 129.9 (d, *J* = 8.3 Hz), 124.7 (d, *J* = 2.8 Hz), 116.2 (d, *J* = 21.4 Hz), 113.8 (d, *J* = 21.0 Hz), 53.6 (d, *J*<sub>C-p</sub> = 7.0 Hz), 52.9 (d, *J* = 6.9 Hz), 45.5 (d, *J*<sub>C-p</sub> = 156.7 Hz), 35.3, 22.8; <sup>31</sup>P NMR (162 MHz, CDCl<sub>3</sub>) δ 26.3. HRMS calc. for C<sub>12</sub>H<sub>18</sub>FNO<sub>4</sub>P [M+H]<sup>+</sup>: 290.0952, found: 290.0951.

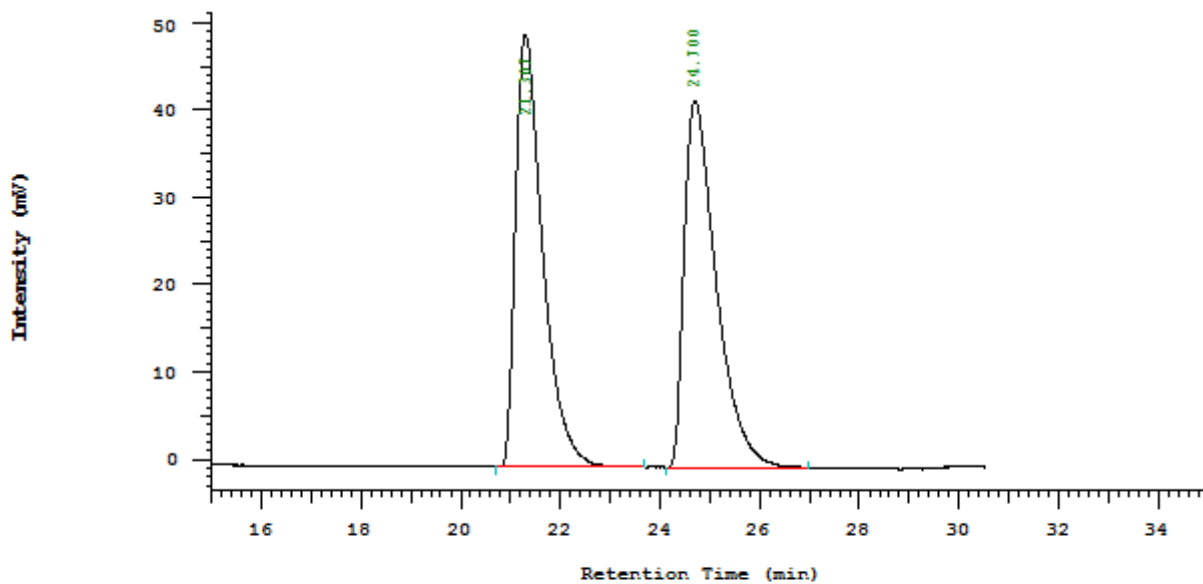

| No. | RT     | Area    | Conc 1  |
|-----|--------|---------|---------|
| 1   | 21.307 | 1879968 | 49.918  |
| 2   | 24.700 | 1886151 | 50.082  |
|     |        | 3766119 | 100.000 |

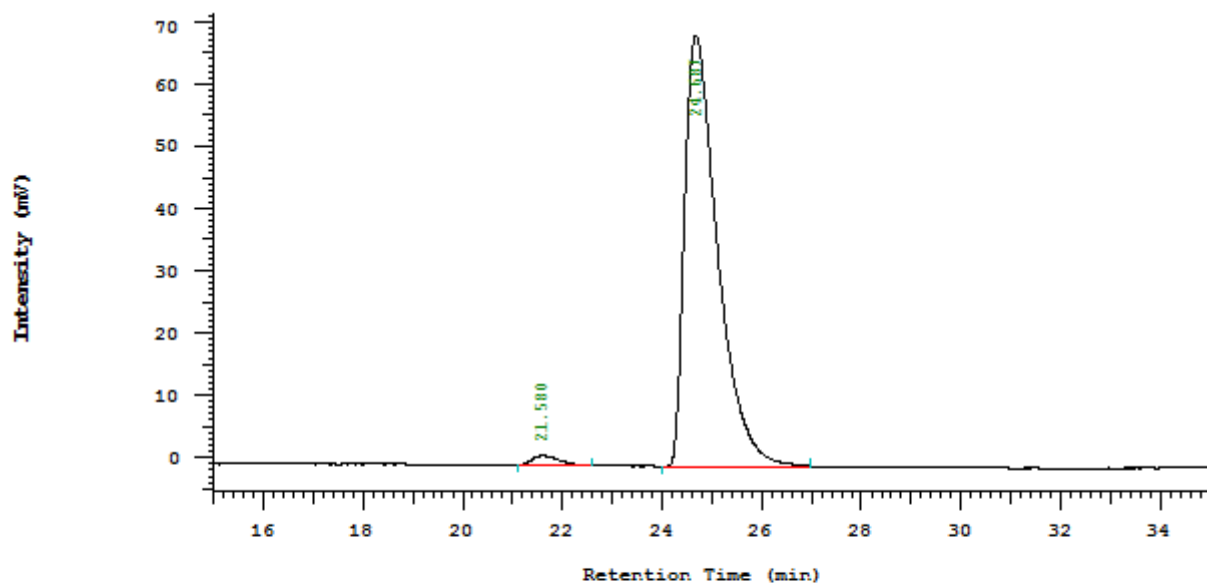

| No. | RT     | Area    | Conc 1  |
|-----|--------|---------|---------|
| 1   | 21.580 | 61272   | 1.889   |
| 2   | 24.687 | 3183118 | 98.111  |
|     |        |         | 100.000 |

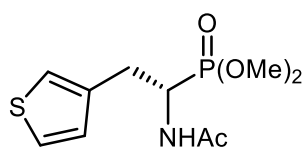

**4j**

**dimethyl (S)-(1-acetamido-2-(thiophen-3-yl)ethyl)phosphonate (4j).** 33.7 mg (99%

yield) of **4j** was obtained as colorless oil after purification with column chromatography on silica gel (hexanes/EtOAc/methanol, 1/1/0.1). 96% ee was determined by chiral HPLC (Chiralpak AD-H, *n*-hexane/*i*-PrOH = 90/10, 0.8 mL/min, 254 nm, 40 °C):  $t_R$  (major) = 13.4 min,  $t_R$  (minor) = 12.7 min.  $[\alpha]_D^{20}$  = 19.8 (*c* 1.6, CH<sub>2</sub>Cl<sub>2</sub>). <sup>1</sup>H NMR (400 MHz, CDCl<sub>3</sub>) δ 7.26 – 7.25 (m, 1H), 7.07 (d, *J* = 1.7 Hz, 1H), 6.97 (d, *J* = 4.9 Hz, 1H), 6.39 (d, *J* = 9.7 Hz, 1H), 4.84 – 4.74 (m, 1H), 3.75 (dd, *J* = 10.7, 3.6 Hz, 6H), 3.22 – 3.15 (m, 1H), 3.05 – 2.96 (m, 1H), 1.93 (d, *J* = 0.5 Hz, 3H); <sup>13</sup>C NMR (101 MHz, CDCl<sub>3</sub>) δ 169.8 (d,  $J_{C-p}$  = 4.9 Hz), 136.6 (d,  $J_{C-p}$  = 13.9 Hz), 128.3, 125.8, 122.3, 53.5 (d,  $J_{C-p}$  = 7.0 Hz), 52.9 (d,  $J_{C-p}$  = 6.9 Hz), 45.1 (d,  $J_{C-p}$  = 156.5 Hz), 30.2 (d,  $J_{C-p}$  = 3.6 Hz), 22.9; <sup>31</sup>P NMR (162 MHz, CDCl<sub>3</sub>) δ 26.6. HRMS calc. for C<sub>10</sub>H<sub>17</sub>NO<sub>4</sub>PS [M+H]<sup>+</sup>: 278.0610, found: 278.0615.

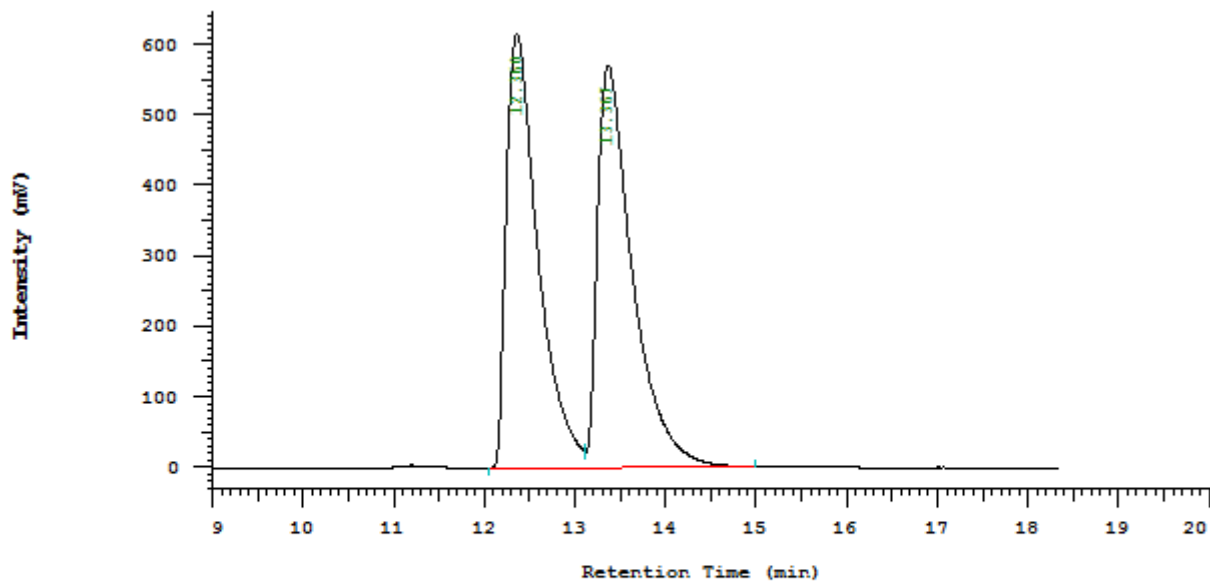

| No. | RT     | Area     | Conc 1  |
|-----|--------|----------|---------|
| 1   | 12.360 | 14938968 | 49.351  |
| 2   | 13.367 | 15331816 | 50.649  |
|     |        | 30270784 | 100.000 |

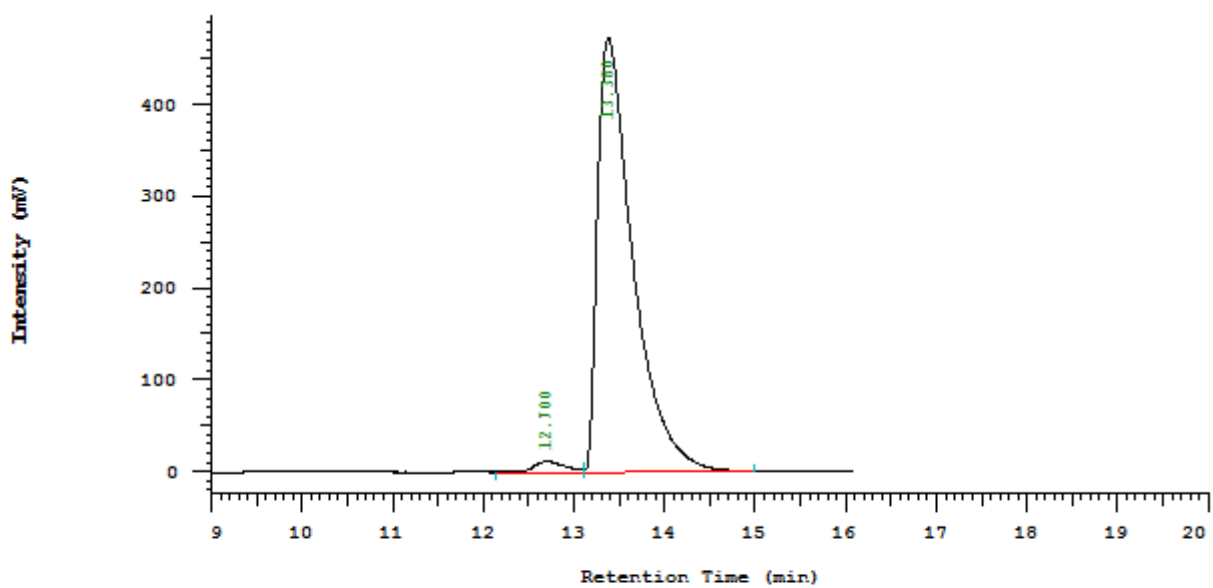

| No. | RT     | Area     | Conc 1  |
|-----|--------|----------|---------|
| 1   | 12.700 | 268212   | 2.041   |
| 2   | 13.380 | 12871025 | 97.959  |
|     |        | 13139237 | 100.000 |

### III. Deuterium Labelling Experiments

The reactions were conducted according to the general asymmetric hydrogenation procedure.

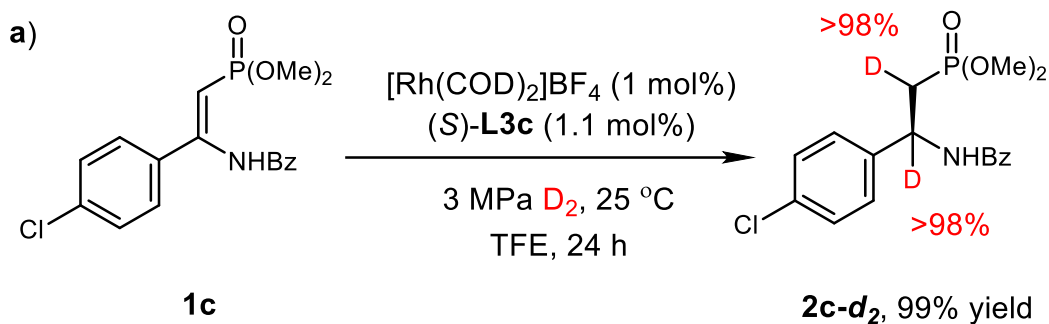

The reactions using D<sub>2</sub> as hydrogen source was conducted, and fully deuterated product was observed.

**dimethyl ((1S)-2-benzamido-2-(4-chlorophenyl) ethyl-1,2-d<sub>2</sub>) phosphonate (2c-d<sub>2</sub>)**. 45.8 mg (99% yield) of **2c-d<sub>2</sub>** was obtained as colorless oil after purification with column chromatography on silica gel (hexanes/EtOAc/methanol, 1/1/0.1). <sup>1</sup>H NMR (400 MHz, CDCl<sub>3</sub>) δ 8.18 (s, 1H), 7.92 (d, *J* = 7.6 Hz, 2H), 7.53 – 7.29 (m, 7H), 3.72 (d, *J* = 10.8 Hz, 3H), 3.46 (d, *J* = 10.9 Hz, 3H), 2.40 (d, *J* = 17.5 Hz, 1H).

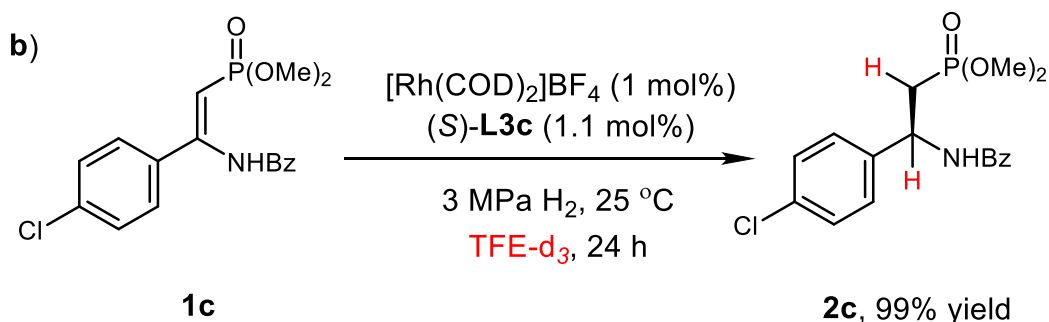

The reactions using TFE-*d*<sub>3</sub> as solvent was conducted, and no deuterated product was observed.

**dimethyl (S)-(2-benzamido-2-(4-chlorophenyl)ethyl)phosphonate (2c)**. <sup>1</sup>H NMR (400 MHz, CDCl<sub>3</sub>) δ 8.20 (d, *J* = 7.3 Hz, 1H), 7.93 – 7.91 (m, 2H), 7.53 – 7.42 (m, 3H), 7.33 – 7.31 (m, 4H), 5.55 (dq, *J* = 26.3, 6.6 Hz, 1H), 3.72 (d, *J* = 11.0 Hz, 3H), 3.46 (d, *J* = 11.1 Hz, 3H), 2.40 (dt, *J* = 17.2, 6.0 Hz, 2H).

#### IV. Monitoring the Ees along with the Reaction Process

In a nitrogen-filled glovebox, a stainless steel autoclave was charged with [Rh(COD)<sub>2</sub>]BF<sub>4</sub> (0.00125mmol, 0.01 equiv), (S)-L3c (0.001375mmol, 0.011 equiv) in 1.0 mL of a degassed TFE. After stirring for 60 min at room temperature, the reaction mixture was added to a mixture of the substrate (**1c**) (0.125 mmol, 1 equiv) in 1.0 mL of the same solvent, and the hydrogenation was performed at 25 °C under H<sub>2</sub> pressure of 3 MPa for indicated time. After indicated time, the hydrogen was slowly released and the reaction solvent was evaporated. The residue was purified by flash column chromatography to determine the yields and ee values of the product **2c**.

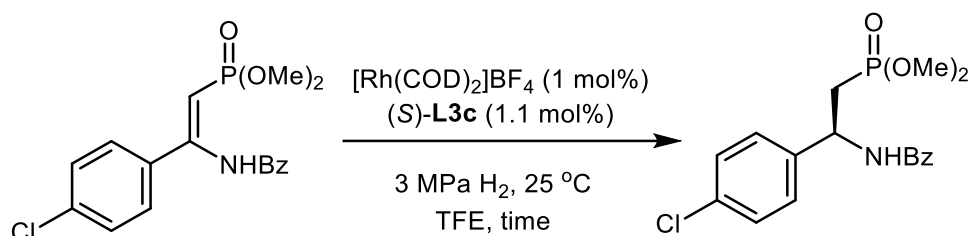

| Time (h) | Yield (%) | Ee (%) |
|----------|-----------|--------|
| 0.5      | 6         | 96     |
| 1.5      | 20        | 96     |
| 3        | 38        | 96     |
| 5        | 56        | 96     |
| 9        | 85        | 96     |
| 12       | 94        | 96     |
| 16       | 99        | 96     |
| 20       | 99        | 96     |
| 24       | 99        | 96     |

## V. Gram-scale Reaction and Synthetic Transformations

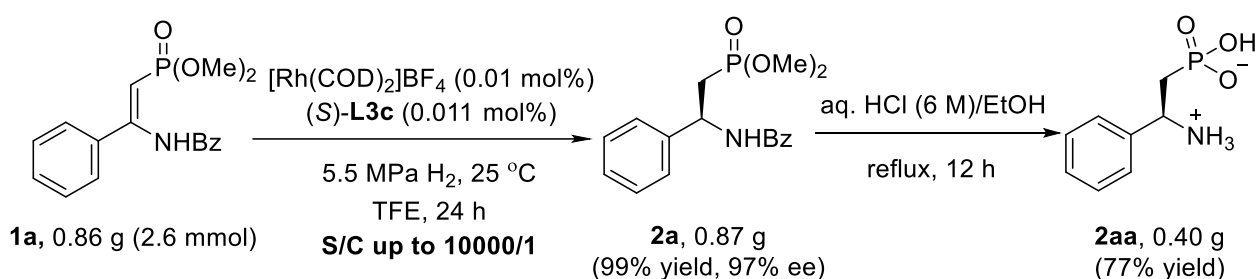

In a nitrogen-filled glovebox, a stainless steel autoclave was charged with  $[\text{Rh}(\text{COD})_2]\text{BF}_4$  (0.0026 mmol, 1.0 mg), (S)-**L3c** (0.00286 mmol, 2.0 mg) in 1.0 mL of a degassed TFE. After stirring for 60 min at room temperature, 0.1 mL of the reaction mixture was added to the substrate **1a** (2.60 mmol, 0.86 g) in 1.9 mL of the same solvent, and the hydrogenation was performed at 25 °C under  $\text{H}_2$  pressure of 5.5 MPa for 24 h. Then the hydrogen was slowly released and the reaction solvent was evaporated. 0.87 g (99% yield) of **2a** was obtained as a white solid after purification with column chromatography on silica gel (hexanes/EtOAc/methanol, 1/1/0.1). 97% ee was determined by chiral HPLC (Chiralcel OD-H, *n*-hexane/*i*-PrOH = 80/20, 0.8 mL/min, 254 nm, 40 °C):  $t_R$  (major) = 9.7 min,  $t_R$  (minor) = 12.7 min.

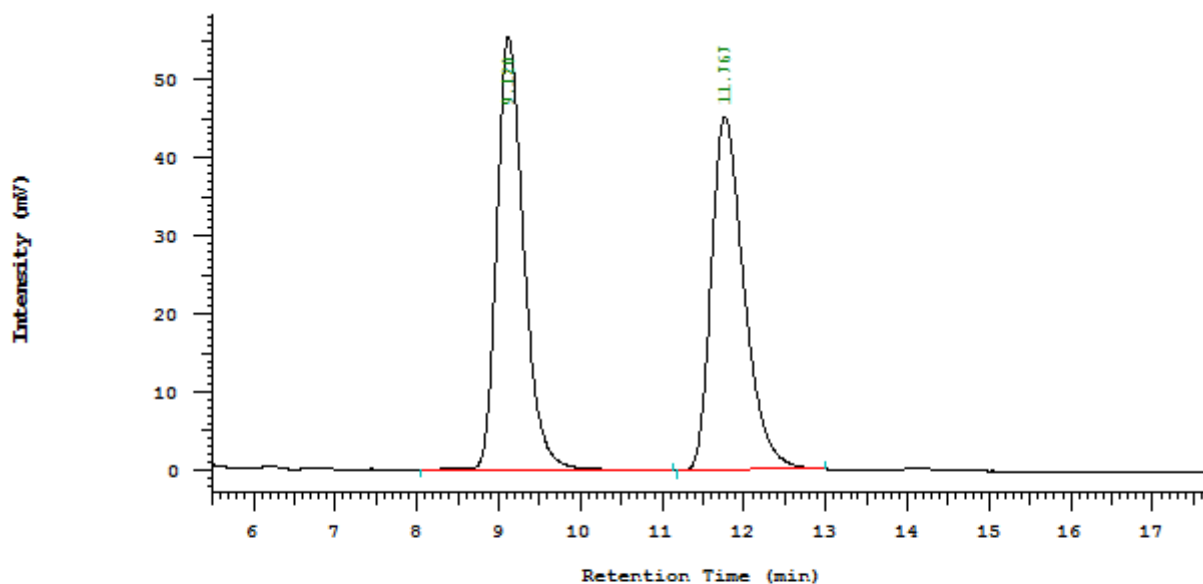

| No. | RT     | Area    | Conc 1  |
|-----|--------|---------|---------|
| 1   | 9.120  | 1286773 | 50.474  |
| 2   | 11.767 | 1262622 | 49.526  |
|     |        | 2549395 | 100.000 |

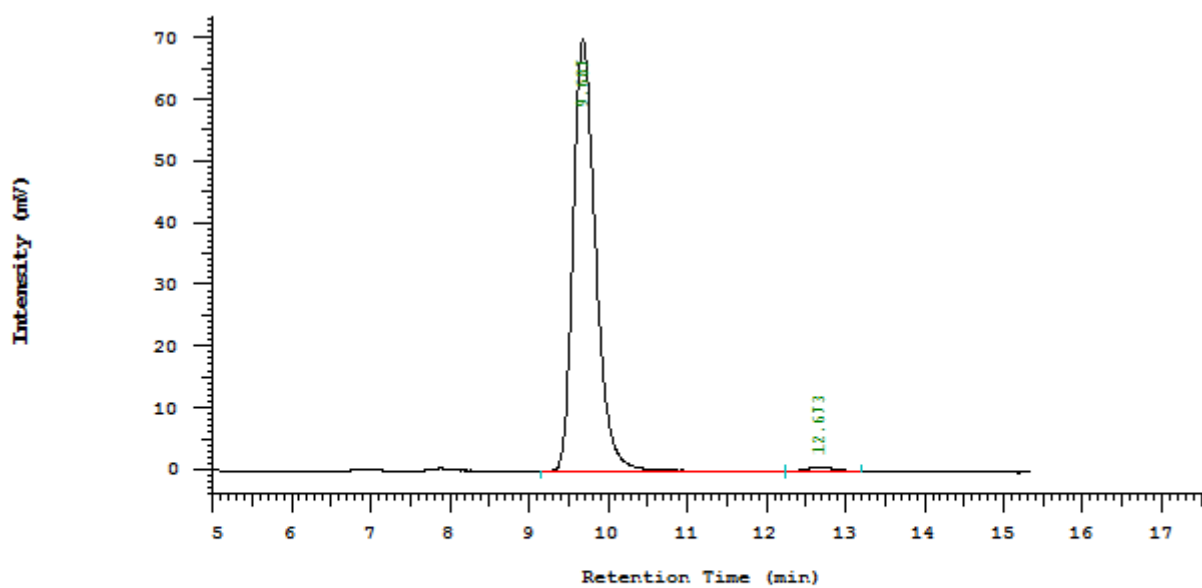

| No. | RT     | Area    | Conc 1  |
|-----|--------|---------|---------|
| 1   | 9.687  | 1390440 | 98.687  |
| 2   | 12.673 | 18495   | 1.313   |
|     |        | 1408935 | 100.000 |

The above hydrogenated product **4a** (0.87 g, 2.6 mmol) was added to 20 mL of a mixed solution of hydrochloric acid (6 M) and ethanol (v/v = 1/1), and then placed in an oil bath at 110 °C for heating and refluxing for 12 hours. After the completion of the reaction was monitored by TLC, the reaction solution was cooled to room temperature, and ethanol and part of hydrogen chloride were removed under reduced pressure. To the aqueous solution of the product, 10 mL of ethyl acetate was added to extract organic



impurities, and the aqueous phase was retained (the hydrolyzed product was slightly soluble in ethyl acetate). The extraction and purification were repeated three times, and the water was removed by a rotary evaporator to obtain a white solid. The resulting solid hydrogenated product was placed in an oven at 105 °C for 12 hours to remove excess impurities. Finally, pure chiral aminophosphonic acid compounds **2aa** was obtained. (*S*)-hydrogen (2-ammonio-2-phenylethyl) phosphonate (**2aa**)<sup>[8]</sup> 0.40 g (77% yield) of **2aa** was obtained as a white solid without further purification. M.p.: 178 – 180 °C. <sup>1</sup>H NMR (400 MHz, DMSO-*d*<sub>6</sub>) δ 8.92 – 8.91 (m, 1H), 7.91 – 7.89 (m, 1H), 7.58 – 7.22 (m, 7H), 5.37 – 5.32 (m, 1H), 2.49 – 2.27 (m, 1H), 2.07 – 1.97 (m, 1H); <sup>31</sup>P NMR (162 MHz, DMSO-*d*<sub>6</sub>) δ 22.1.

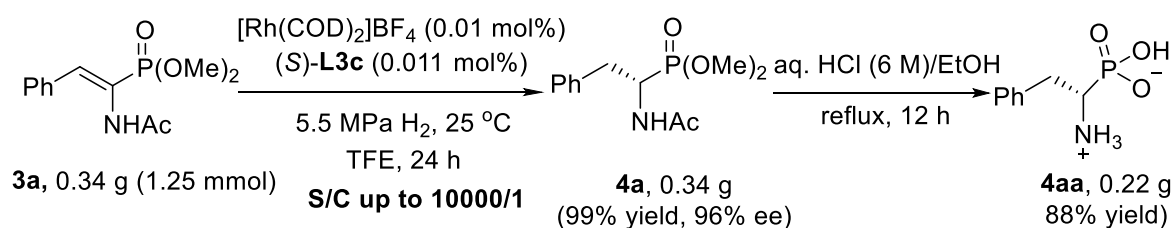

In a nitrogen-filled glovebox, a stainless steel autoclave was charged with  $[Rh(COD)_2]BF_4$  (0.00125mmol, 0.5 mg), (*S*)-**L3c** (0.001375mmol, 1.0 mg) in 1.0 mL of a degassed TFE. After stirring for 60 min at room temperature, 0.1 ml of the reaction mixture was added to the substrate **3a** (1.25 mmol, 0.34 g) in 1.9 mL of the same solvent, and the hydrogenation was performed at 25 °C under H<sub>2</sub> pressure of 5.5 MPa for 24 h. Then the hydrogen was slowly released and the reaction solvent was evaporated. 0.34 g (99% yield) of **4a** was obtained as colorless oil after purification with column chromatography on silica gel (hexanes/EtOAc/methanol, 1/1/0.1). 96% ee was determined by chiral HPLC (Chiralpak AD-H, *n*-hexane/*i*-PrOH = 95/5, 0.8 mL/min, 220 nm, 40 °C): *t*<sub>R</sub> (major) = 22.5 min, *t*<sub>R</sub> (minor) = 20.7 min.

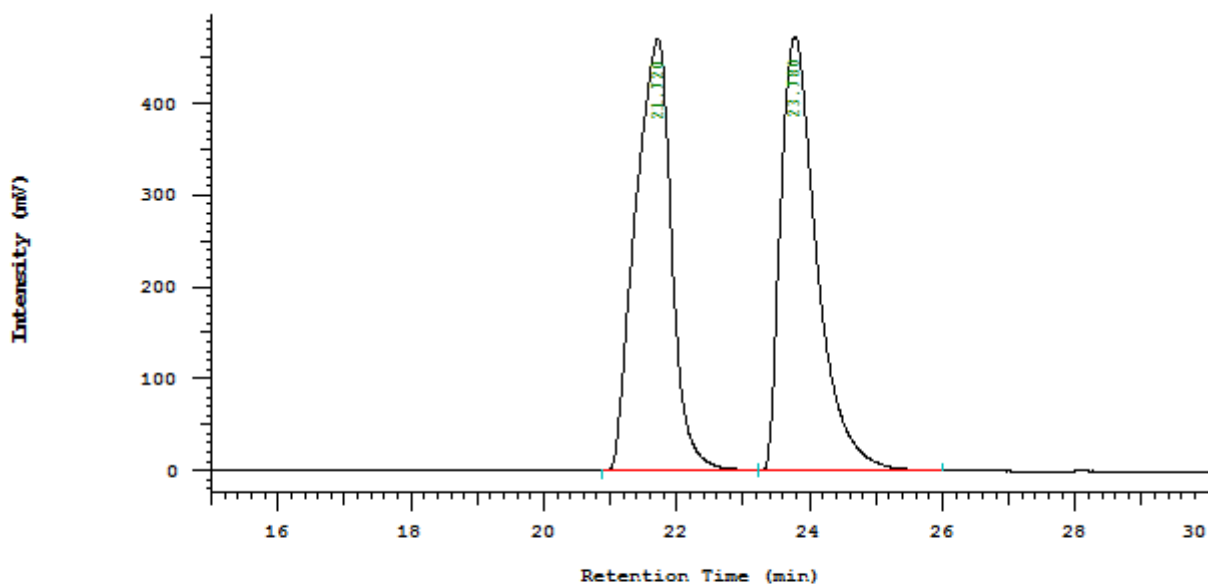

| No. | RT     | Area     | Conc 1  |
|-----|--------|----------|---------|
| 1   | 21.720 | 17840172 | 49.872  |
| 2   | 23.780 | 17931500 | 50.128  |
|     |        | 35771672 | 100.000 |

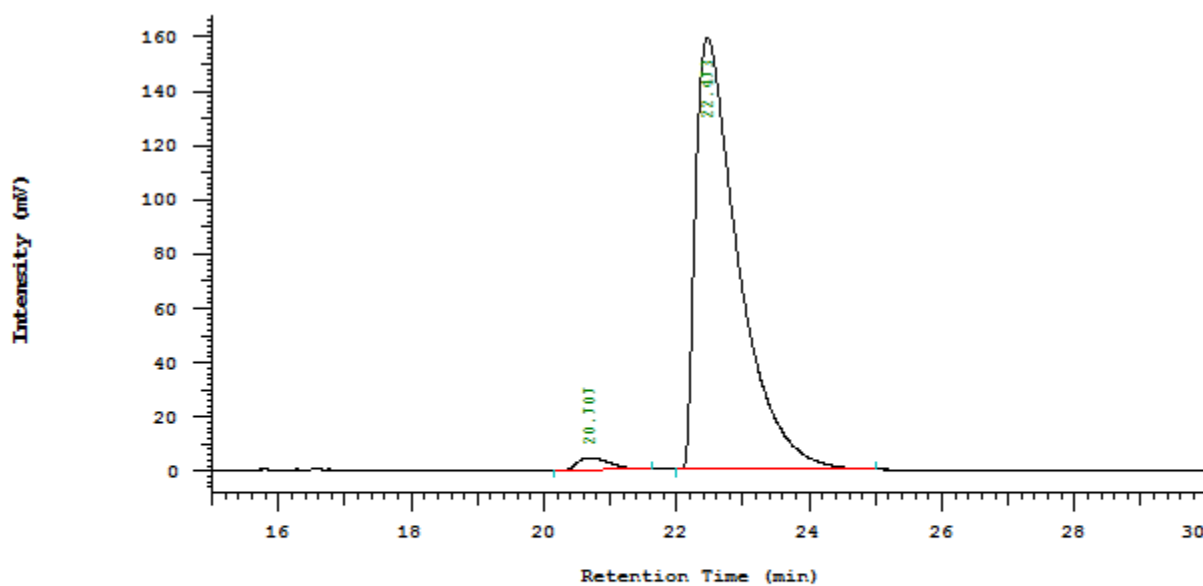

| No. | RT     | Area    | Conc 1  |
|-----|--------|---------|---------|
| 1   | 20.707 | 156706  | 2.158   |
| 2   | 22.473 | 7106197 | 97.842  |
|     |        | 7262903 | 100.000 |

The above hydrogenated product **4a** (0.34 g, 1.25 mmol) was added to 20 mL of a mixed solution of hydrochloric acid (6 M) and ethanol (v/v = 1/1), and then placed in an oil bath at 110 °C for heating and refluxing for 12 hours. After the completion of the reaction was monitored by TLC, the reaction solution was cooled to room temperature, and ethanol and part of hydrogen chloride were removed under reduced

pressure. To the aqueous solution of the product, 10 mL of ethyl acetate was added to extract organic impurities, and the aqueous phase was retained (the hydrolyzed product was slightly soluble in ethyl acetate). The extraction and purification were repeated three times, and the water was removed by a rotary evaporator to obtain a white solid. The resulting solid hydrogenated product was placed in an oven at 105°C for 12 hours to remove excess impurities. Finally, pure chiral aminophosphonic acid compounds **4aa** was obtained. **(S)-hydrogen (1-ammonio-2-phenylethyl) phosphonate (4aa)**.<sup>[9]</sup> 0.22 g (88% yield) of **4aa** was obtained as a white solid without further purification. M.p.: 186 – 188 °C.  $[\alpha]_{\text{D}}^{20} = 35.0$  (*c* 2.0, 1 M aq. NaOH). <sup>1</sup>H NMR (400 MHz, Deuterium Oxide with 1 drop 30%NaOD)  $\delta$  7.42 – 7.02 (m, 5H), 3.13 (ddd, *J* = 14.0, 5.3, 2.6 Hz, 1H), 2.78 (td, *J* = 11.7, 2.6 Hz, 1H), 2.52 – 2.31 (m, 1H); <sup>13</sup>C NMR (101 MHz, Deuterium Oxide with 1 drop 30%NaOD)  $\delta$  141.2 (d, *J* = 15.3 Hz), 129.3, 128.5, 126.1, 52.1 (d, *J* = 138.5 Hz), 38.1; <sup>31</sup>P NMR (162 MHz, Deuterium Oxide with 1 drop 30%NaOD)  $\delta$  20.3.

## VI. References

- [1] F. Palacios, A. M. O. de Retana, S. Pascual, J. Oyarzabal, *J. Org. Chem.* **2004**, *69*, 8767.
- [2] K. Lee, D. Y. Oh, *Bulletin of the Korean Chemical Society* **1990**, *11*, 473.
- [3] R. Kadyrov, O. Zayas, J. Almena, A. Boerner, *Tetrahedron: Asymmetry* **2008**, *19*, 1189.
- [4] J.-Z. Zhang, Y. Li, Z. Wang, K.-L. Ding, *Angew. Chem. Int. Ed.* **2011**, *50*, 11743.
- [5] B. Quiclet-Sire, S. Z. Zard, H. Zhang, *J. Organomet. Chem.* **2002**, *643-644*, 404.
- [6] M. Á. Chávez, S. Vargas, A. Suárez, E. Álvarez, A. Pizzano, *Adv. Synth. Catal.* **2011**, *353*, 2775.
- [7] S. Doherty, J. G. Knight, A. Decken, S. A. Westcott, *Tetrahedron: Asymmetry* **2009**, *20*, 1437.
- [8] A. Woschek, W. Lindner, F. Hammerschmidt, *Adv. Synth. Catal.* **2003**, *345*, 1287.
- [9] J. Kowalik, W. Sawka-Dobrowolska, T. Glowiak, *J. Chem. Soc. Chem. Commun.* **1984**, 446.

## VII. NMR Spectra

8.16  
8.14  
7.94  
7.92  
7.92  
7.51  
7.50  
7.50  
7.49  
7.48  
7.45  
7.43  
7.41  
7.39  
7.37  
7.35  
7.33  
7.31  
7.27  
7.25  
7.23  
5.67  
5.65  
5.64  
5.62  
5.60  
5.59  
5.57  
5.55

3.71  
3.68  
3.40  
3.37  
2.54  
2.52  
2.50  
2.50  
2.48  
2.46  
2.44  
2.41  
2.40  
2.37  
2.36

$^1\text{H NMR}$  (400 MHz,  $\text{CDCl}_3$ )

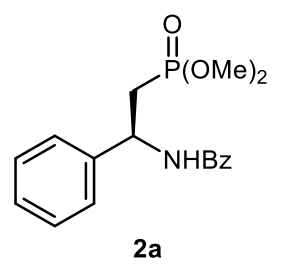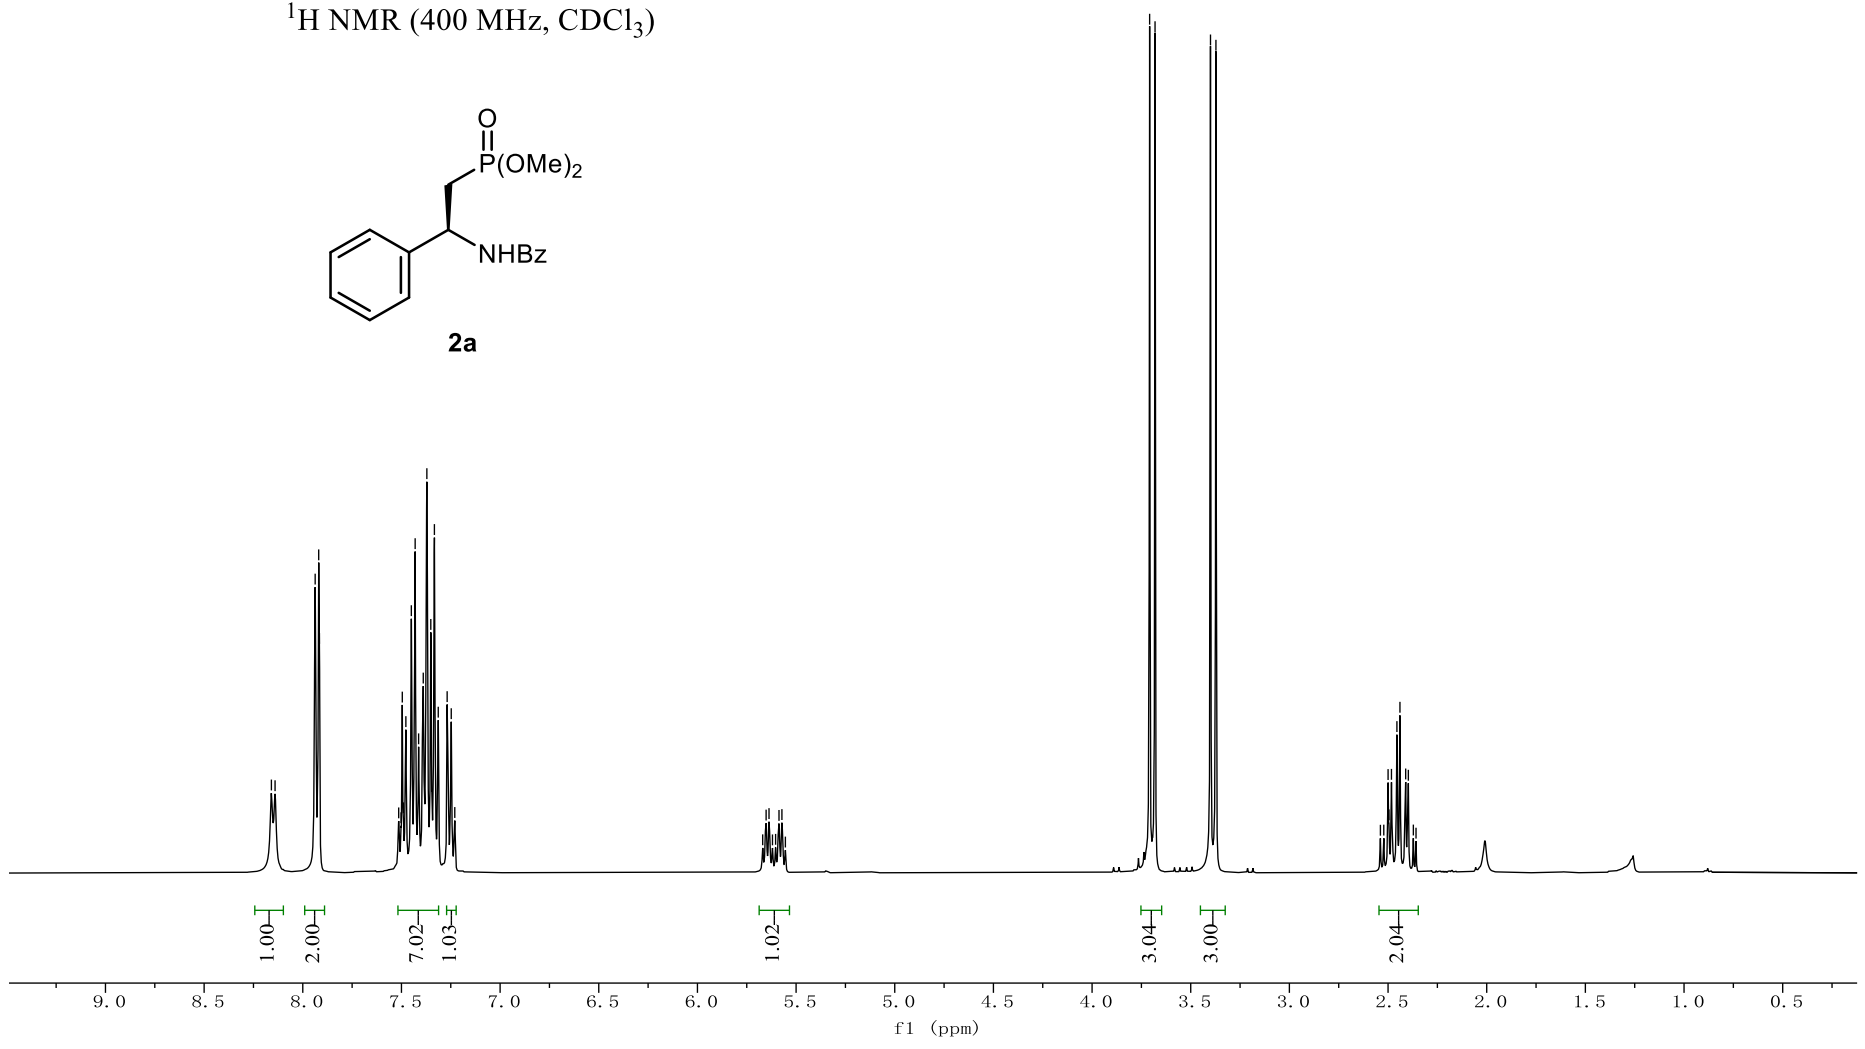

$^{13}\text{C}$  NMR (176 MHz,  $\text{CDCl}_3$ )

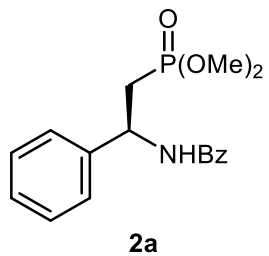

— 166.43

141.21  
141.16  
133.98  
131.63  
128.68  
128.62  
127.55  
127.19  
126.03

52.47  
52.43  
52.38  
52.35  
48.70  
48.67

31.99  
31.20

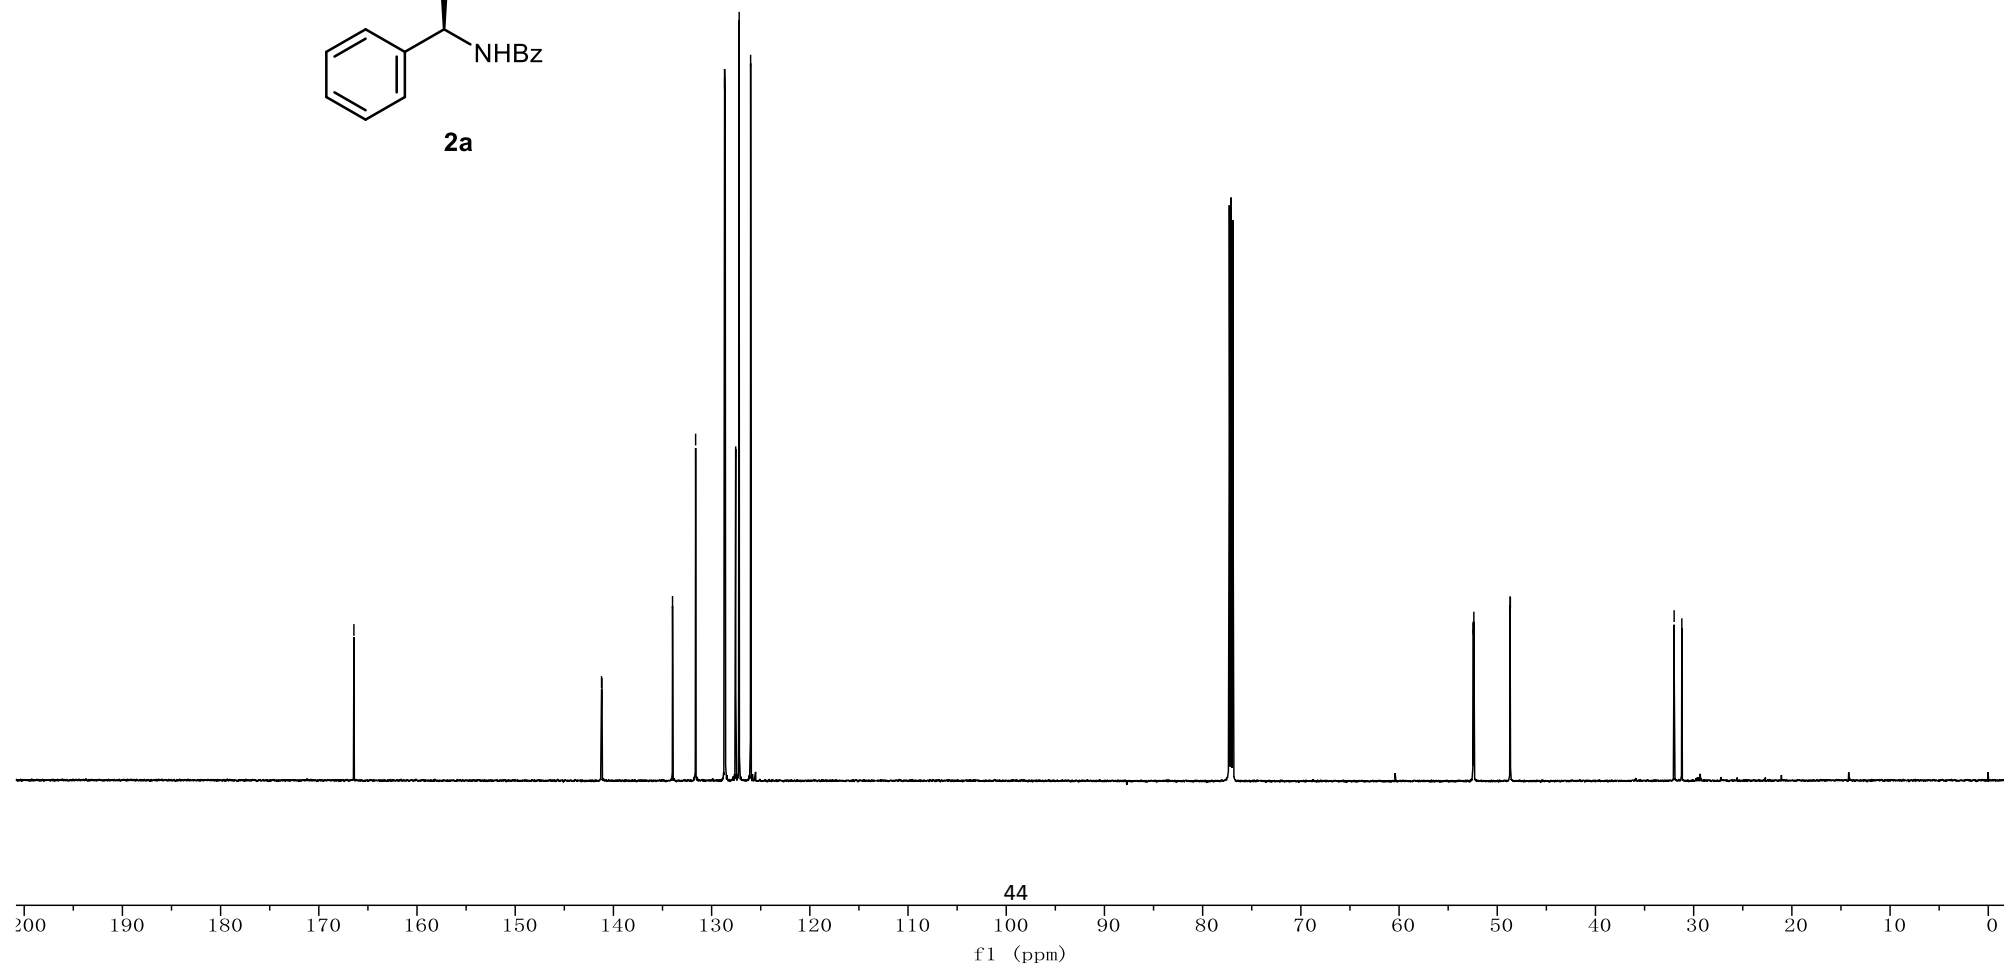

— 30.73

$^{31}\text{P}$  NMR (162 MHz,  $\text{CDCl}_3$ )

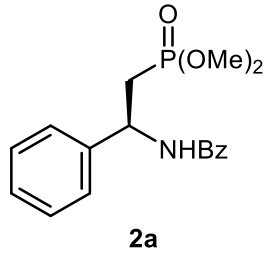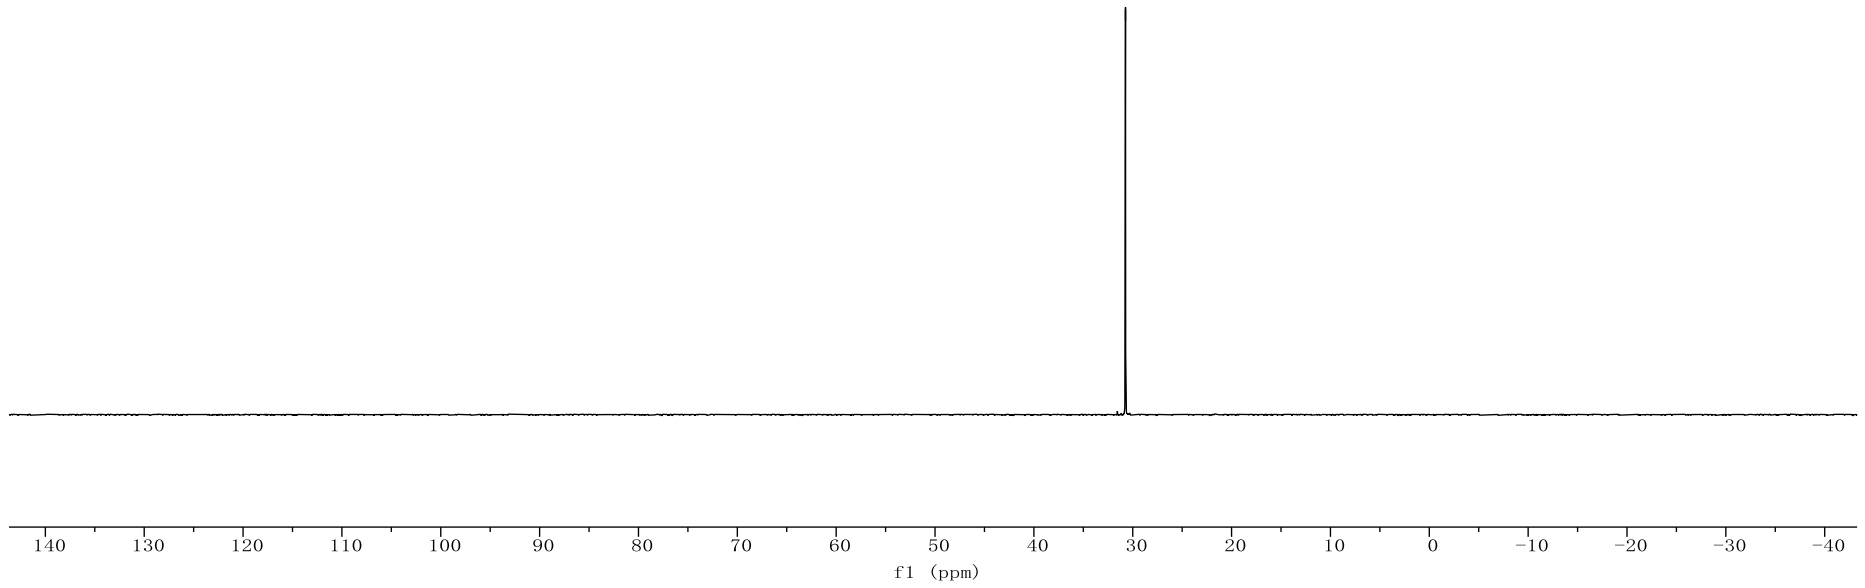

8.16  
8.15  
7.94  
7.94  
7.93  
7.92  
7.92  
7.91  
7.54  
7.54  
7.53  
7.52  
7.52  
7.51  
7.50  
7.50  
7.49  
7.47  
7.47  
7.46  
7.45  
7.44  
7.44  
7.43  
7.39  
7.38  
7.37  
7.37  
7.36  
7.35  
7.34  
7.34  
7.06  
7.05  
7.05  
7.03  
7.03  
7.02  
7.01  
7.00  
5.64  
5.62  
5.61  
5.59  
5.57  
5.56  
5.54  
5.52  
3.73  
3.71  
3.46  
3.43  
2.50  
2.48  
2.46  
2.45  
2.44  
2.43  
2.41  
2.40  
2.39  
2.38  
2.36

$^1\text{H}$  NMR (400 MHz,  $\text{CDCl}_3$ )

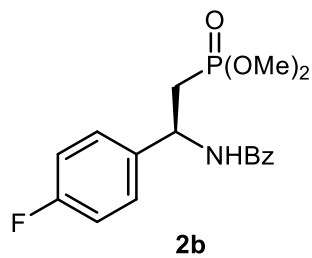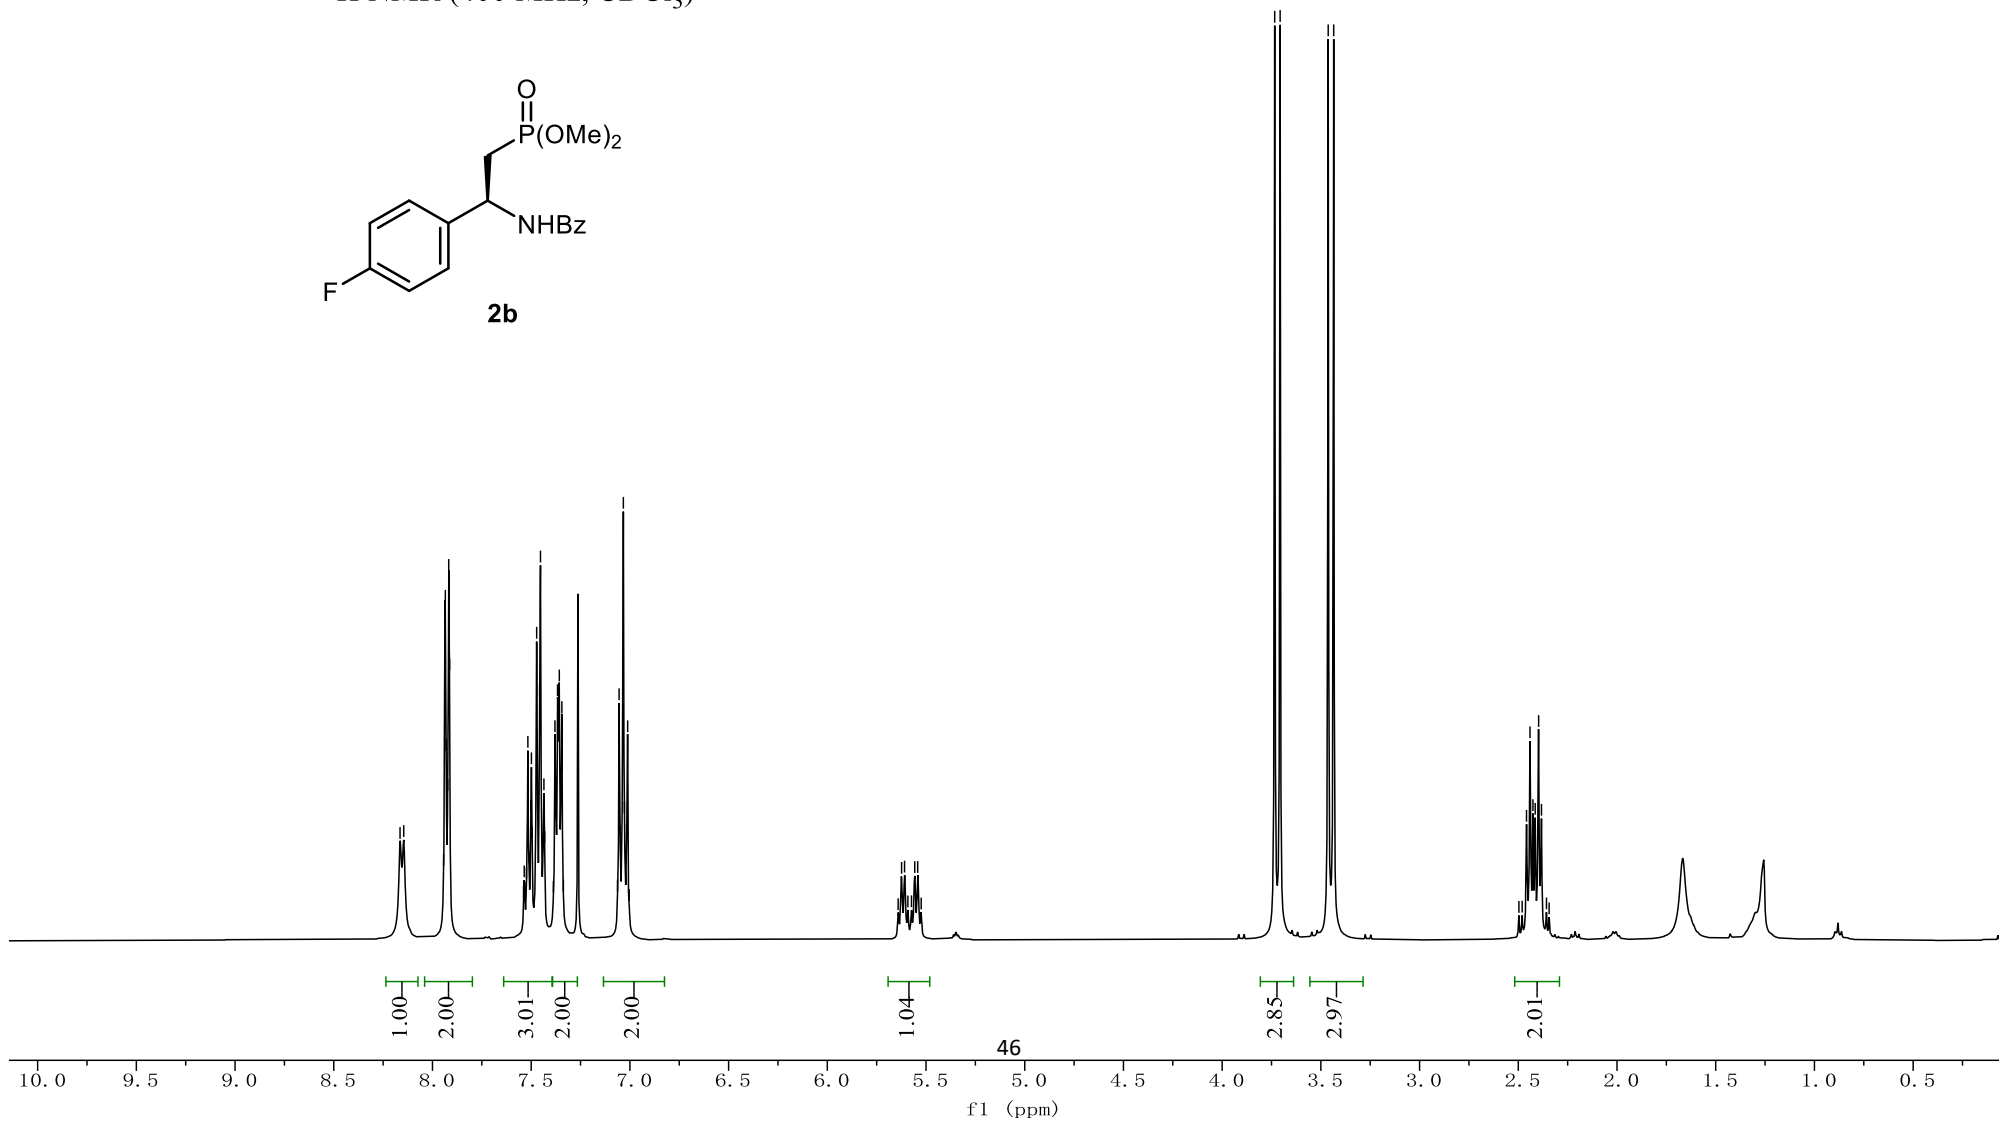

$^{13}\text{C}$  NMR (101 MHz,  $\text{CDCl}_3$ )

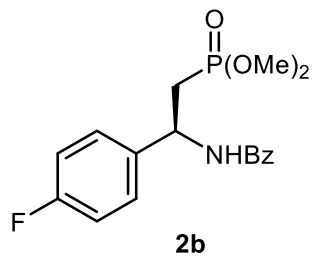

166.41  
163.32  
160.87

137.10  
137.04  
136.98  
136.95  
133.77  
131.75  
128.68  
127.75  
127.66  
127.16  
115.63  
115.41

52.58  
52.51  
52.43  
52.36  
48.25  
48.20

32.23  
30.86  
29.71

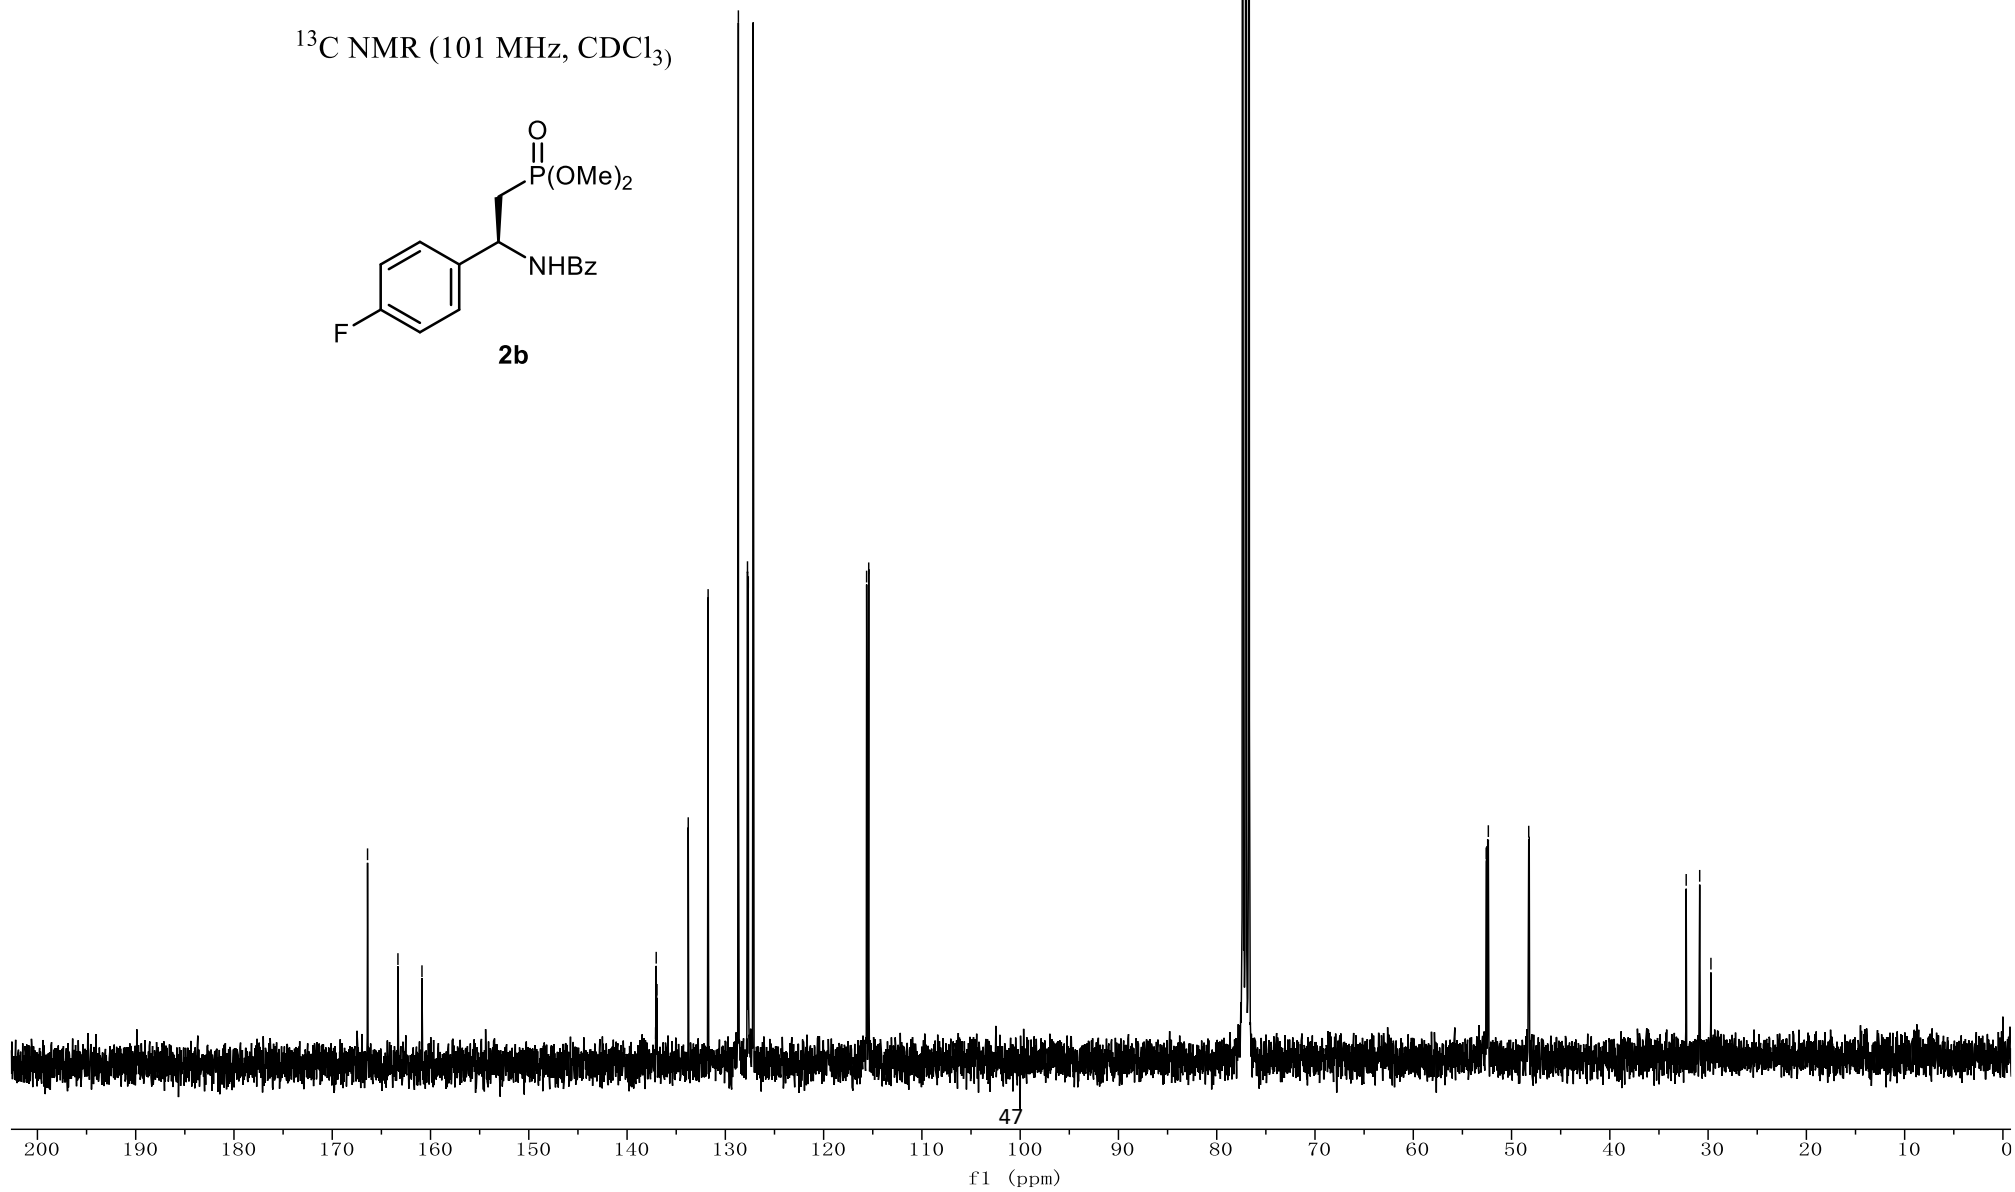



$^{31}\text{P}$  NMR (162 MHz,  $\text{CDCl}_3$ )

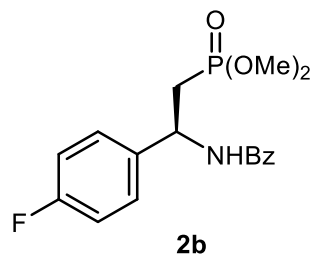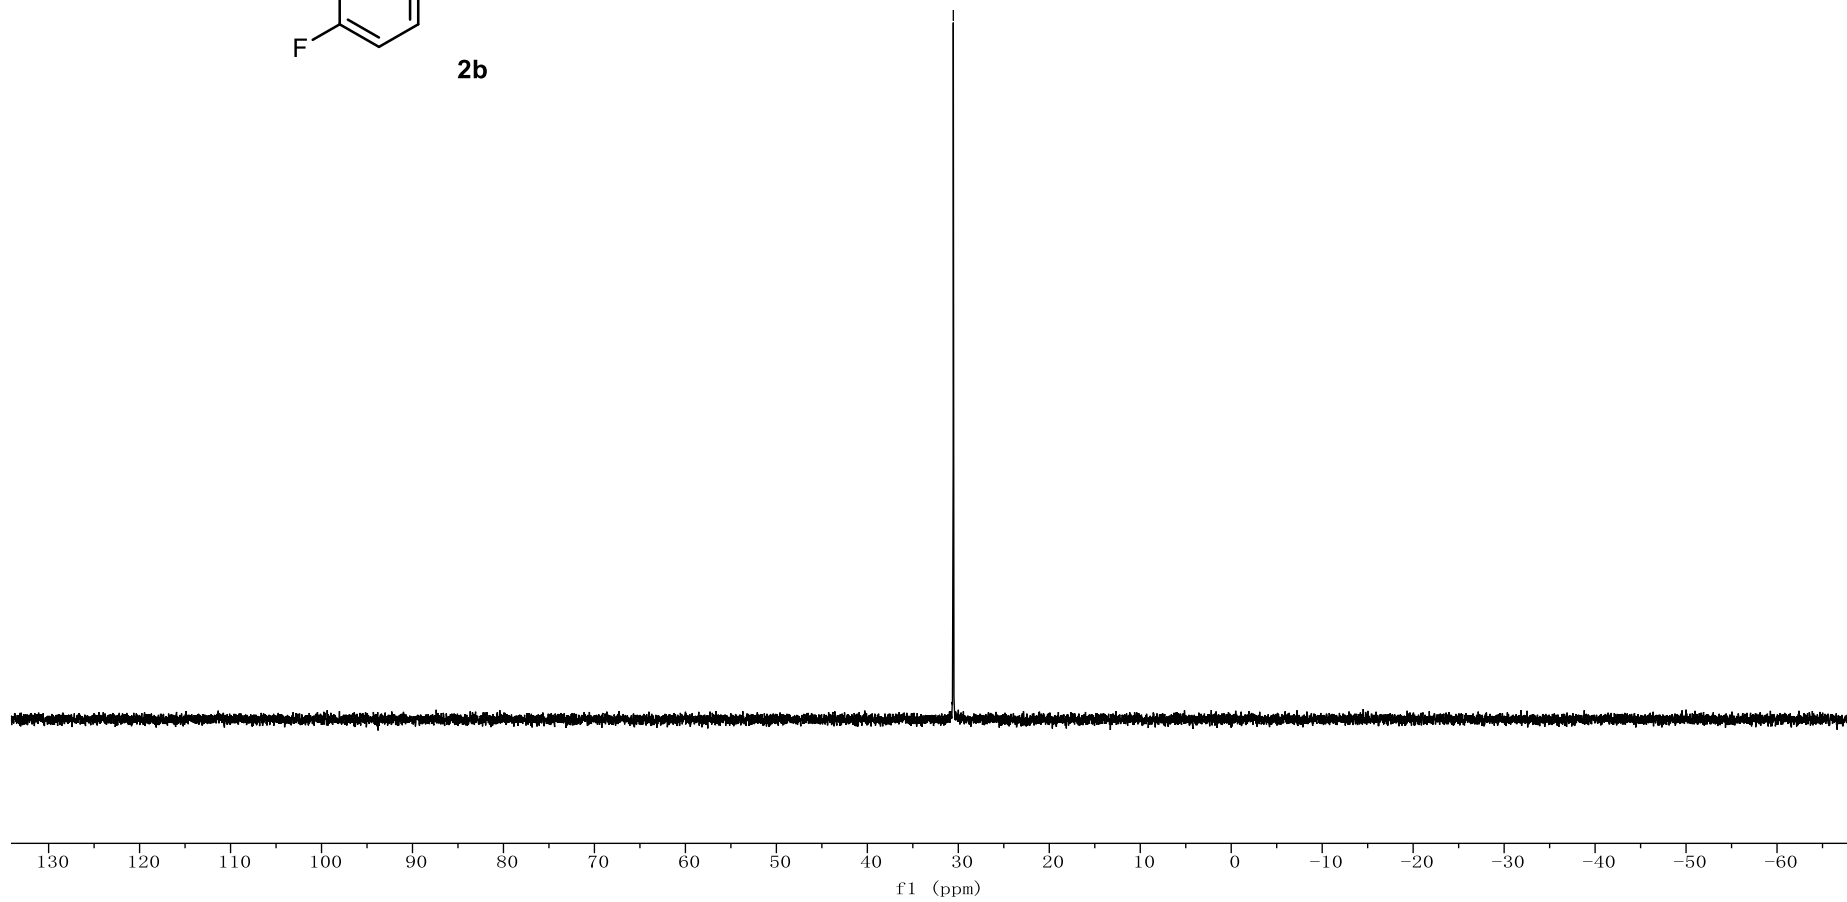

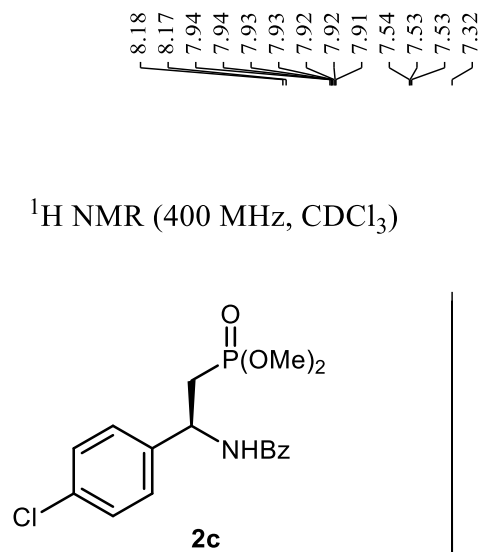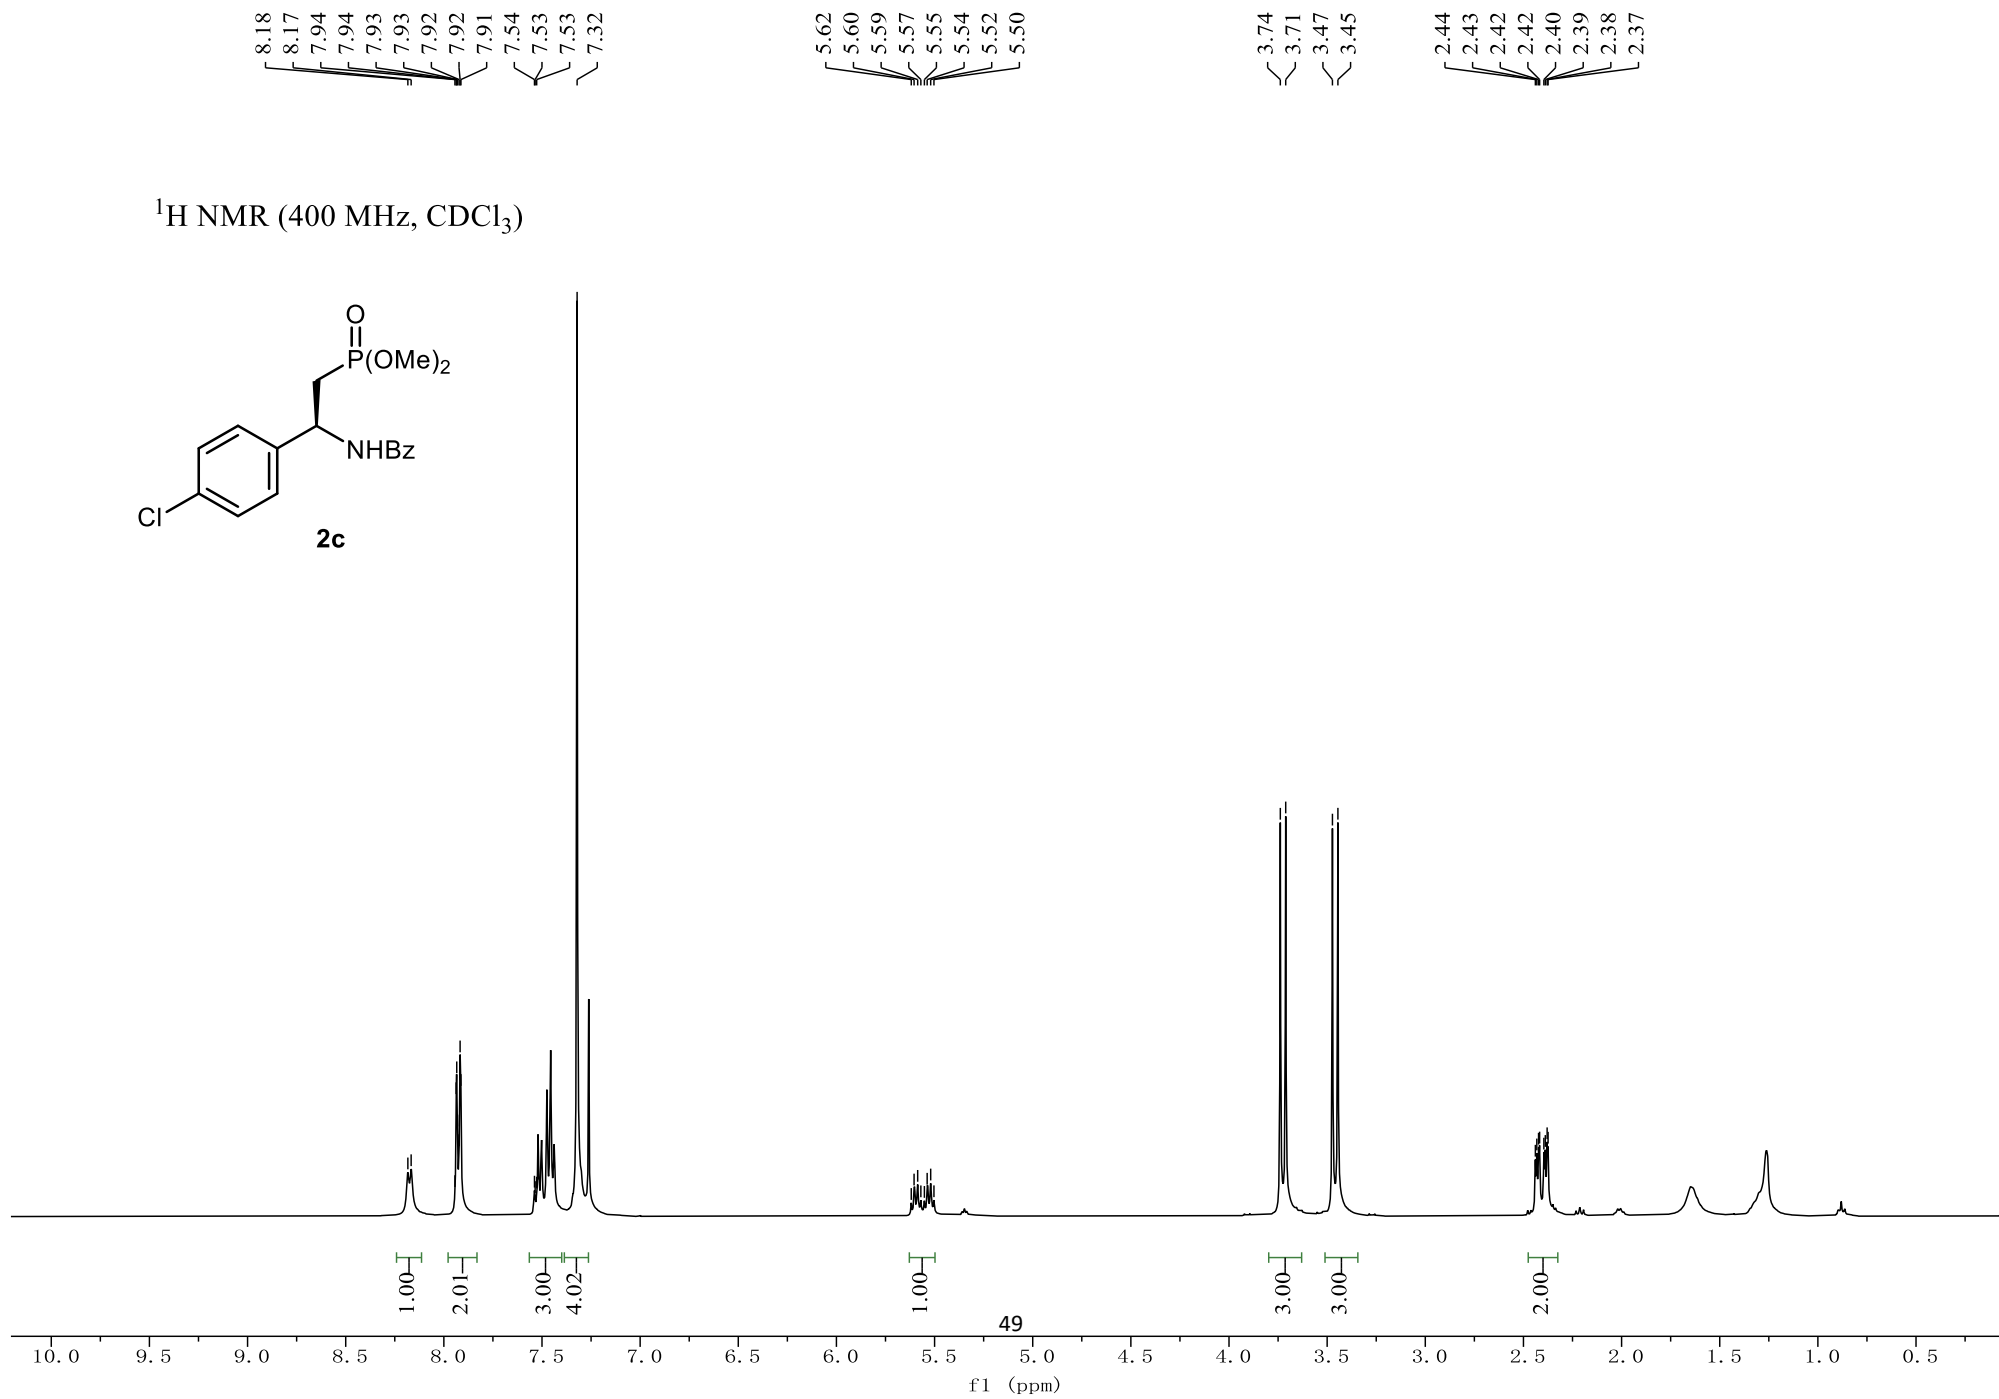

$^{13}\text{C}$  NMR (101 MHz,  $\text{CDCl}_3$ )

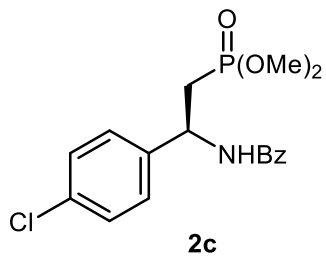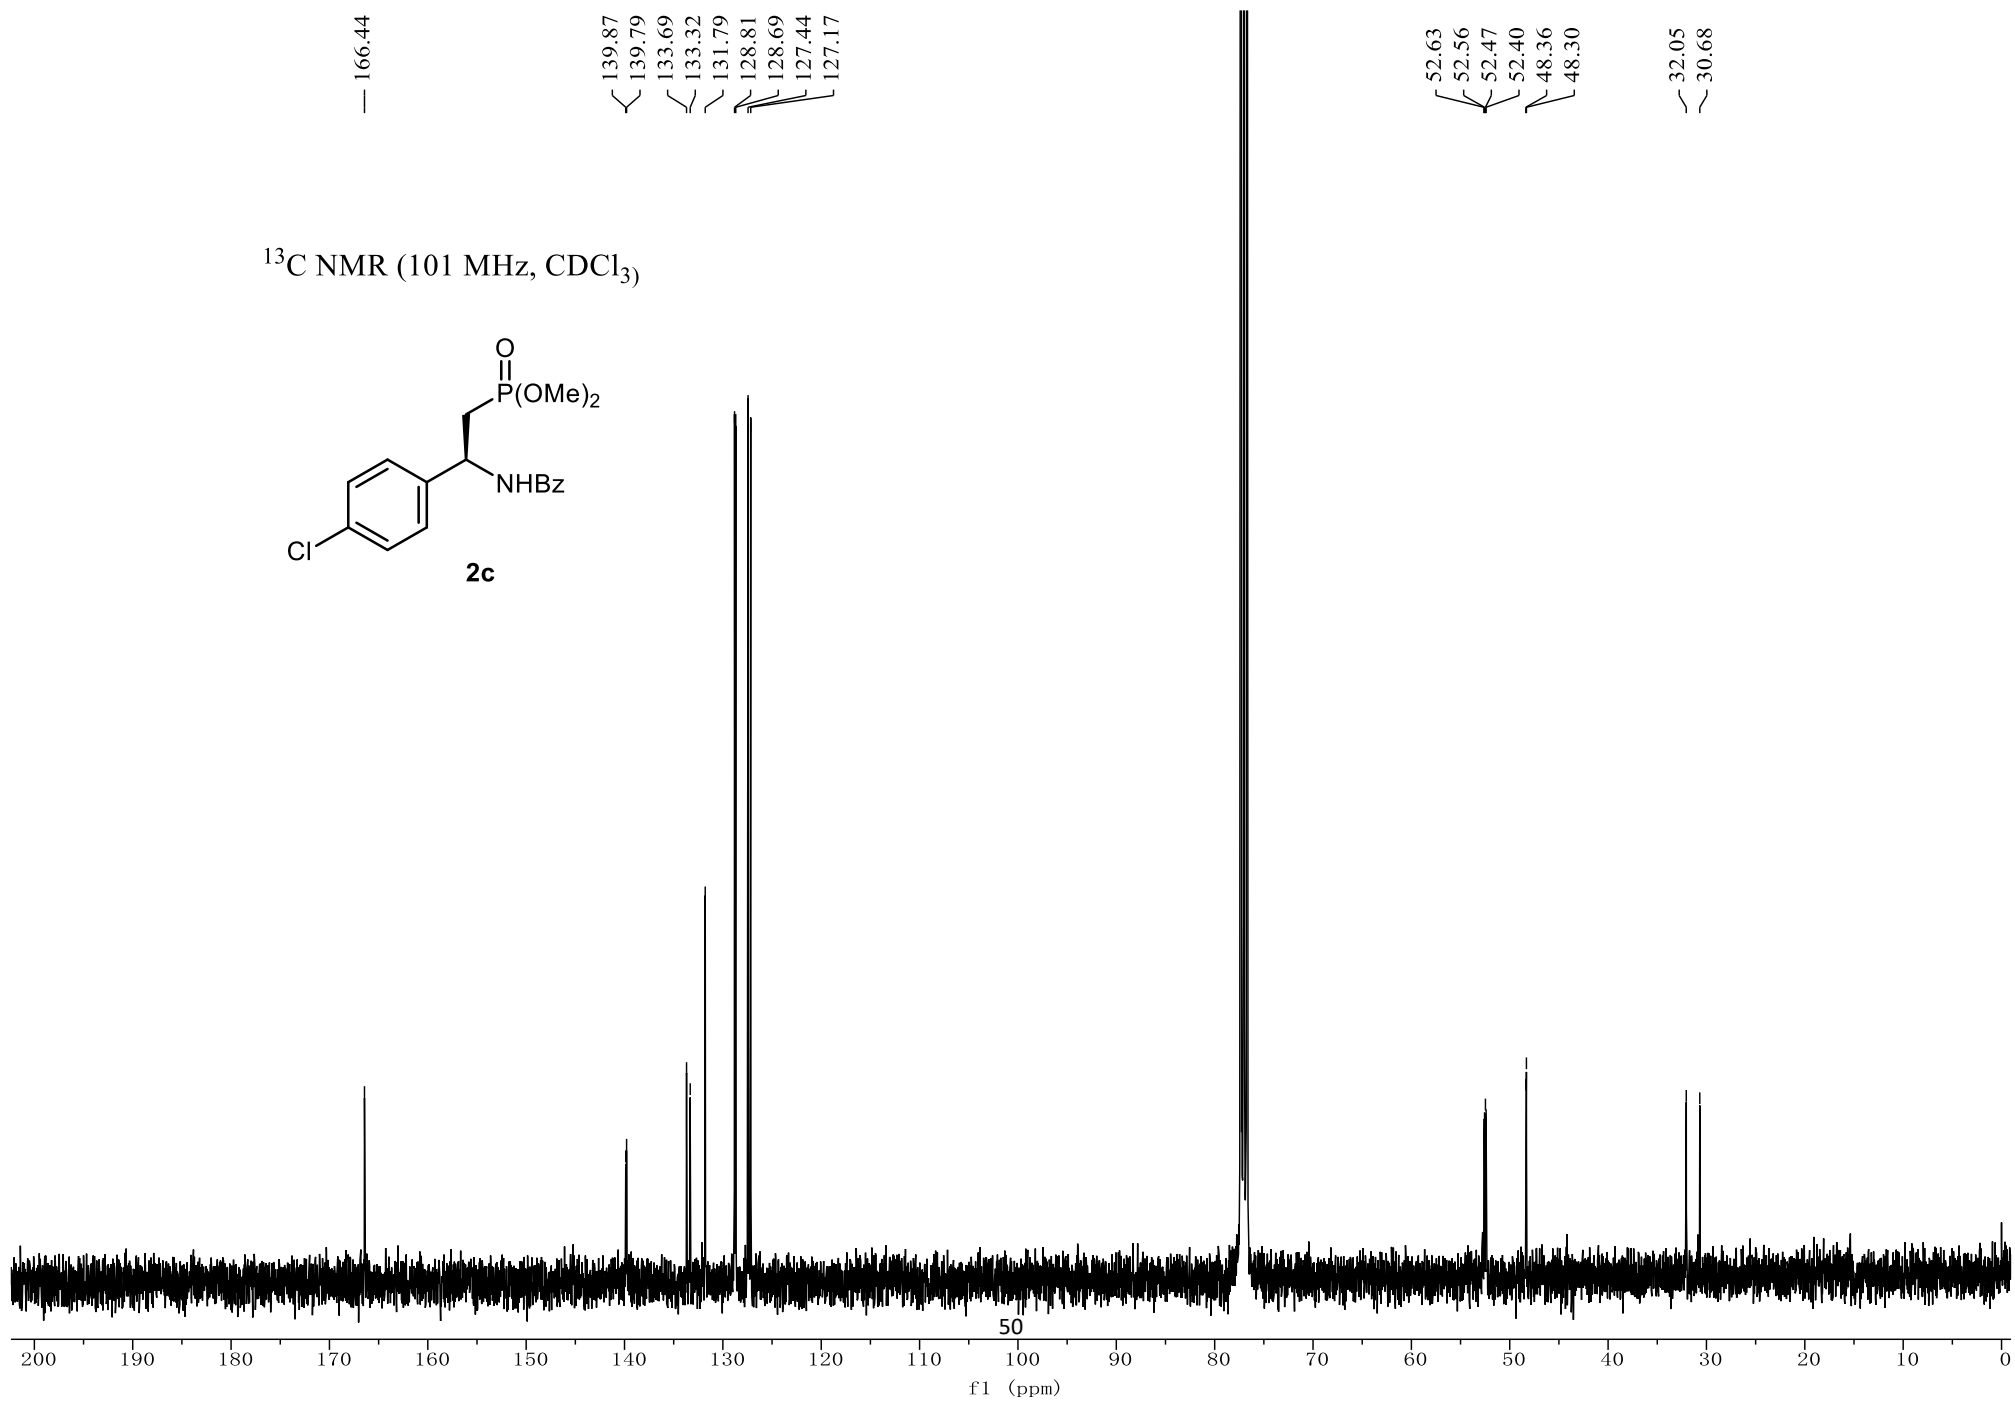

$^{31}\text{P}$  NMR (162 MHz,  $\text{CDCl}_3$ )

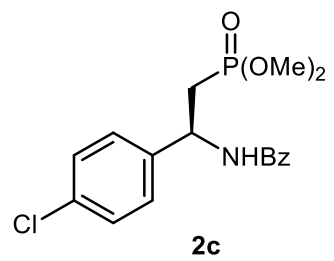

— 30.42

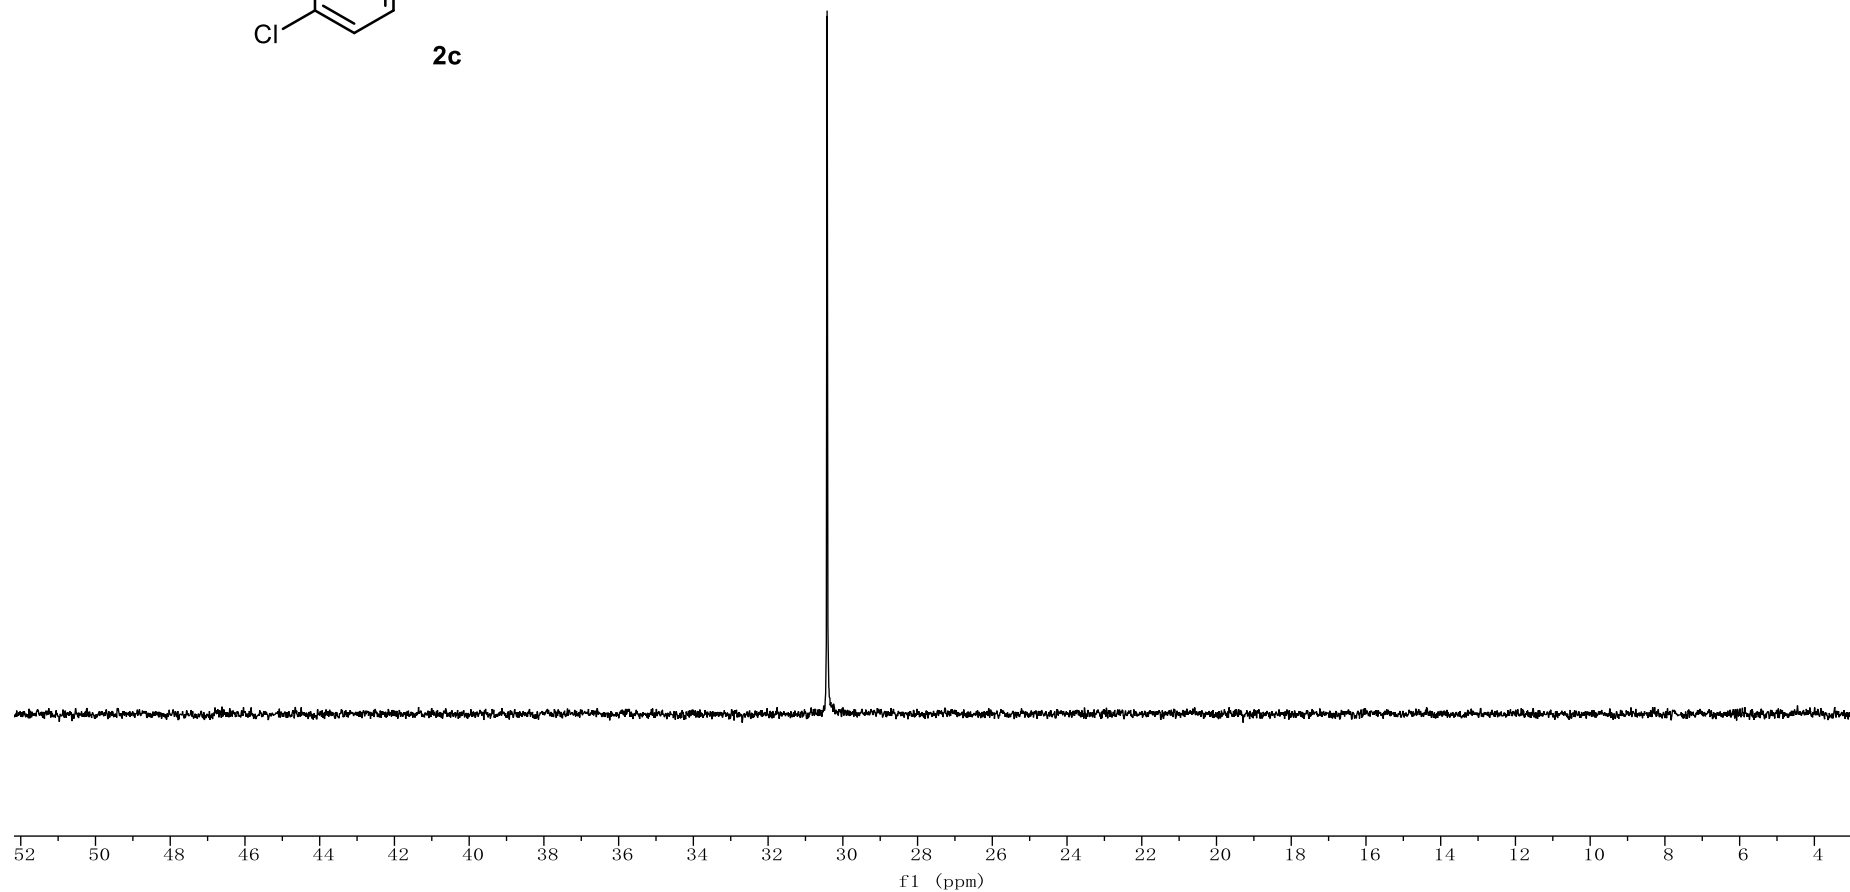

8.18  
8.16  
7.94  
7.94  
7.93  
7.93  
7.92  
7.91  
7.91  
7.54  
7.54  
7.53  
7.52  
7.51  
7.51  
7.50  
7.50  
7.49  
7.48  
7.48  
7.47  
7.47  
7.47  
7.46  
7.46  
7.45  
7.44  
7.44  
7.43  
7.28  
7.28  
7.27  
7.26  
7.26  
7.25  
5.60  
5.58  
5.56  
5.55  
5.53  
5.52  
5.50  
5.48  
3.74  
3.71  
3.48  
3.45  
2.44  
2.43  
2.42  
2.42  
2.39  
2.39  
2.38  
2.37

$^1\text{H}$  NMR (400 MHz,  $\text{CDCl}_3$ )

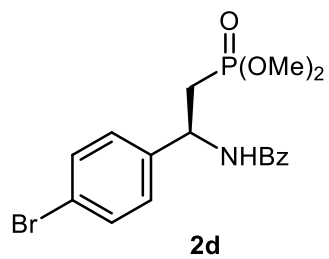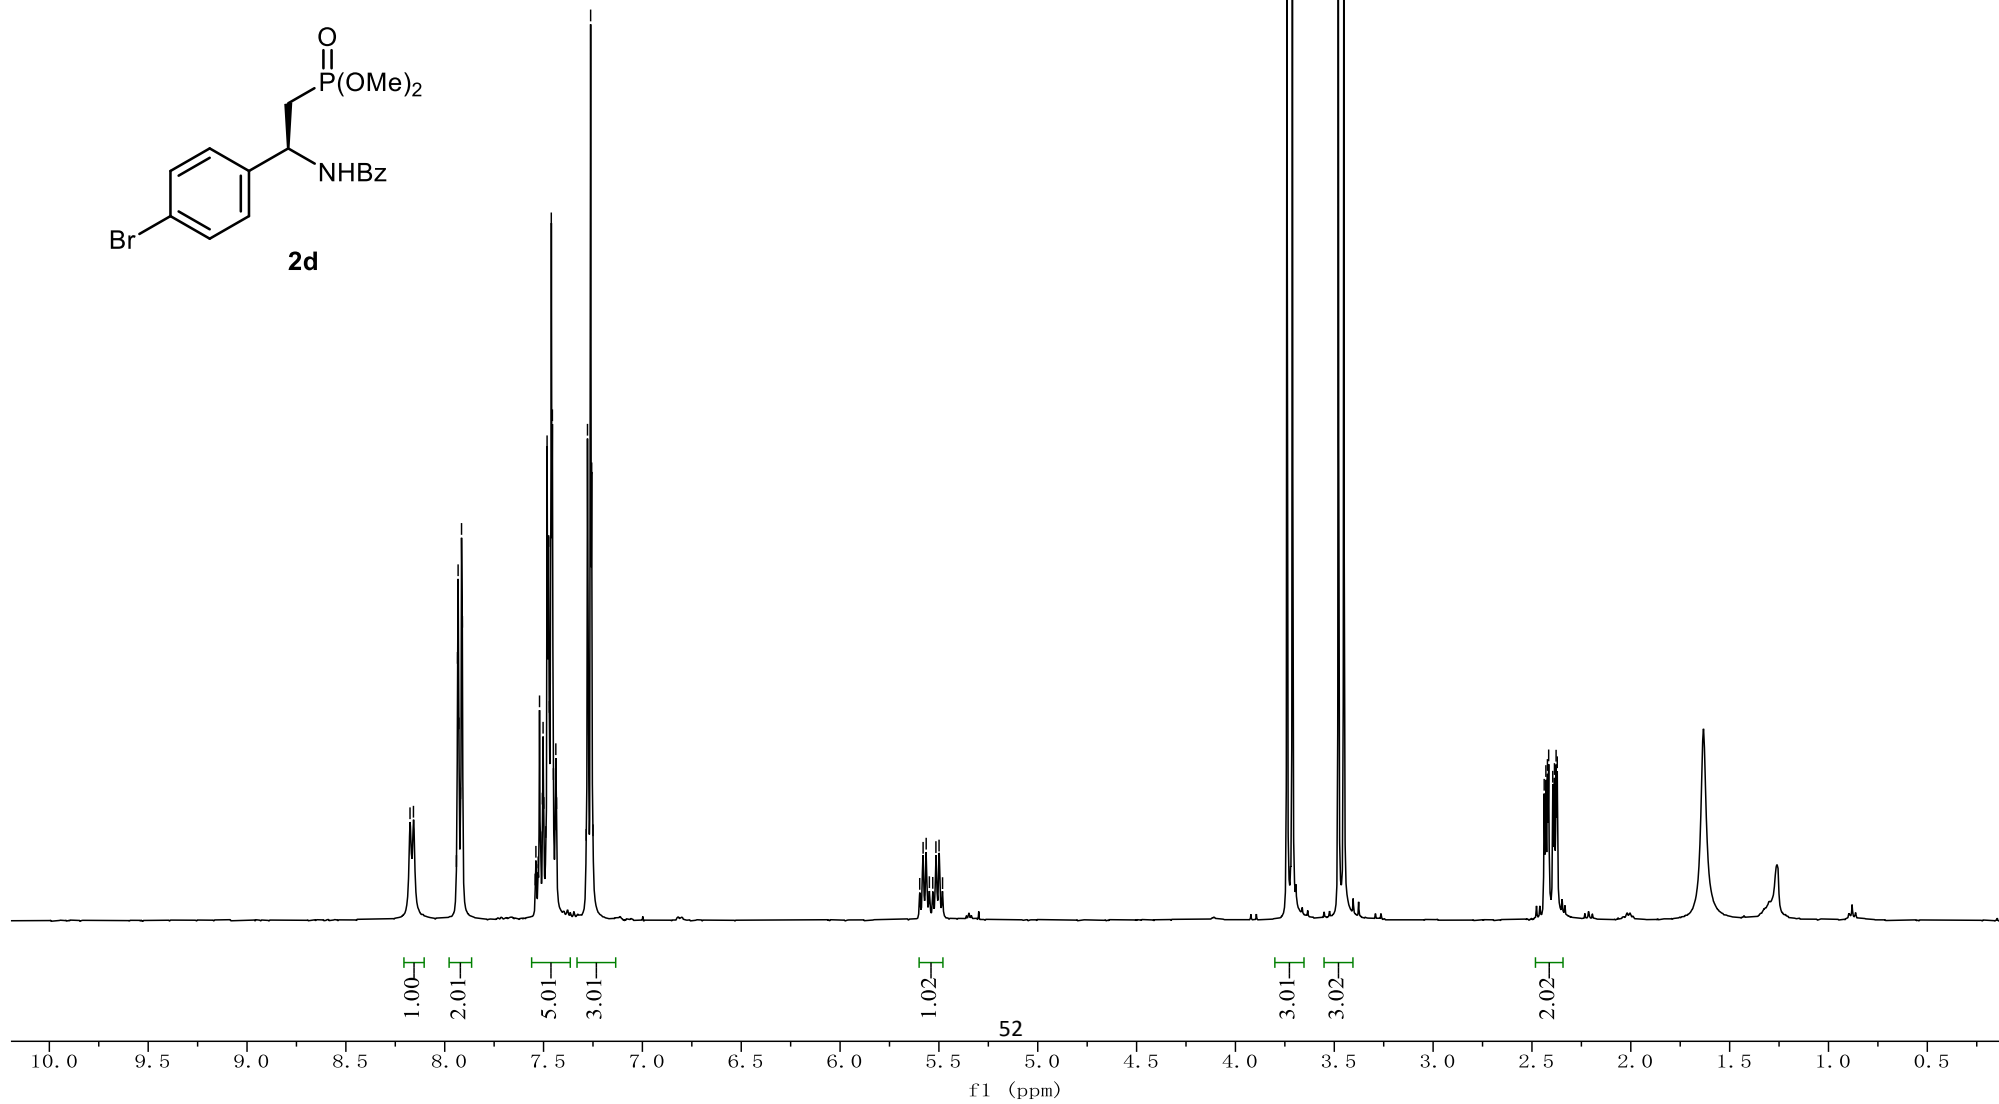

$^{13}\text{C}$  NMR (101 MHz,  $\text{CDCl}_3$ )

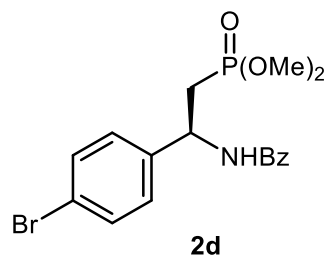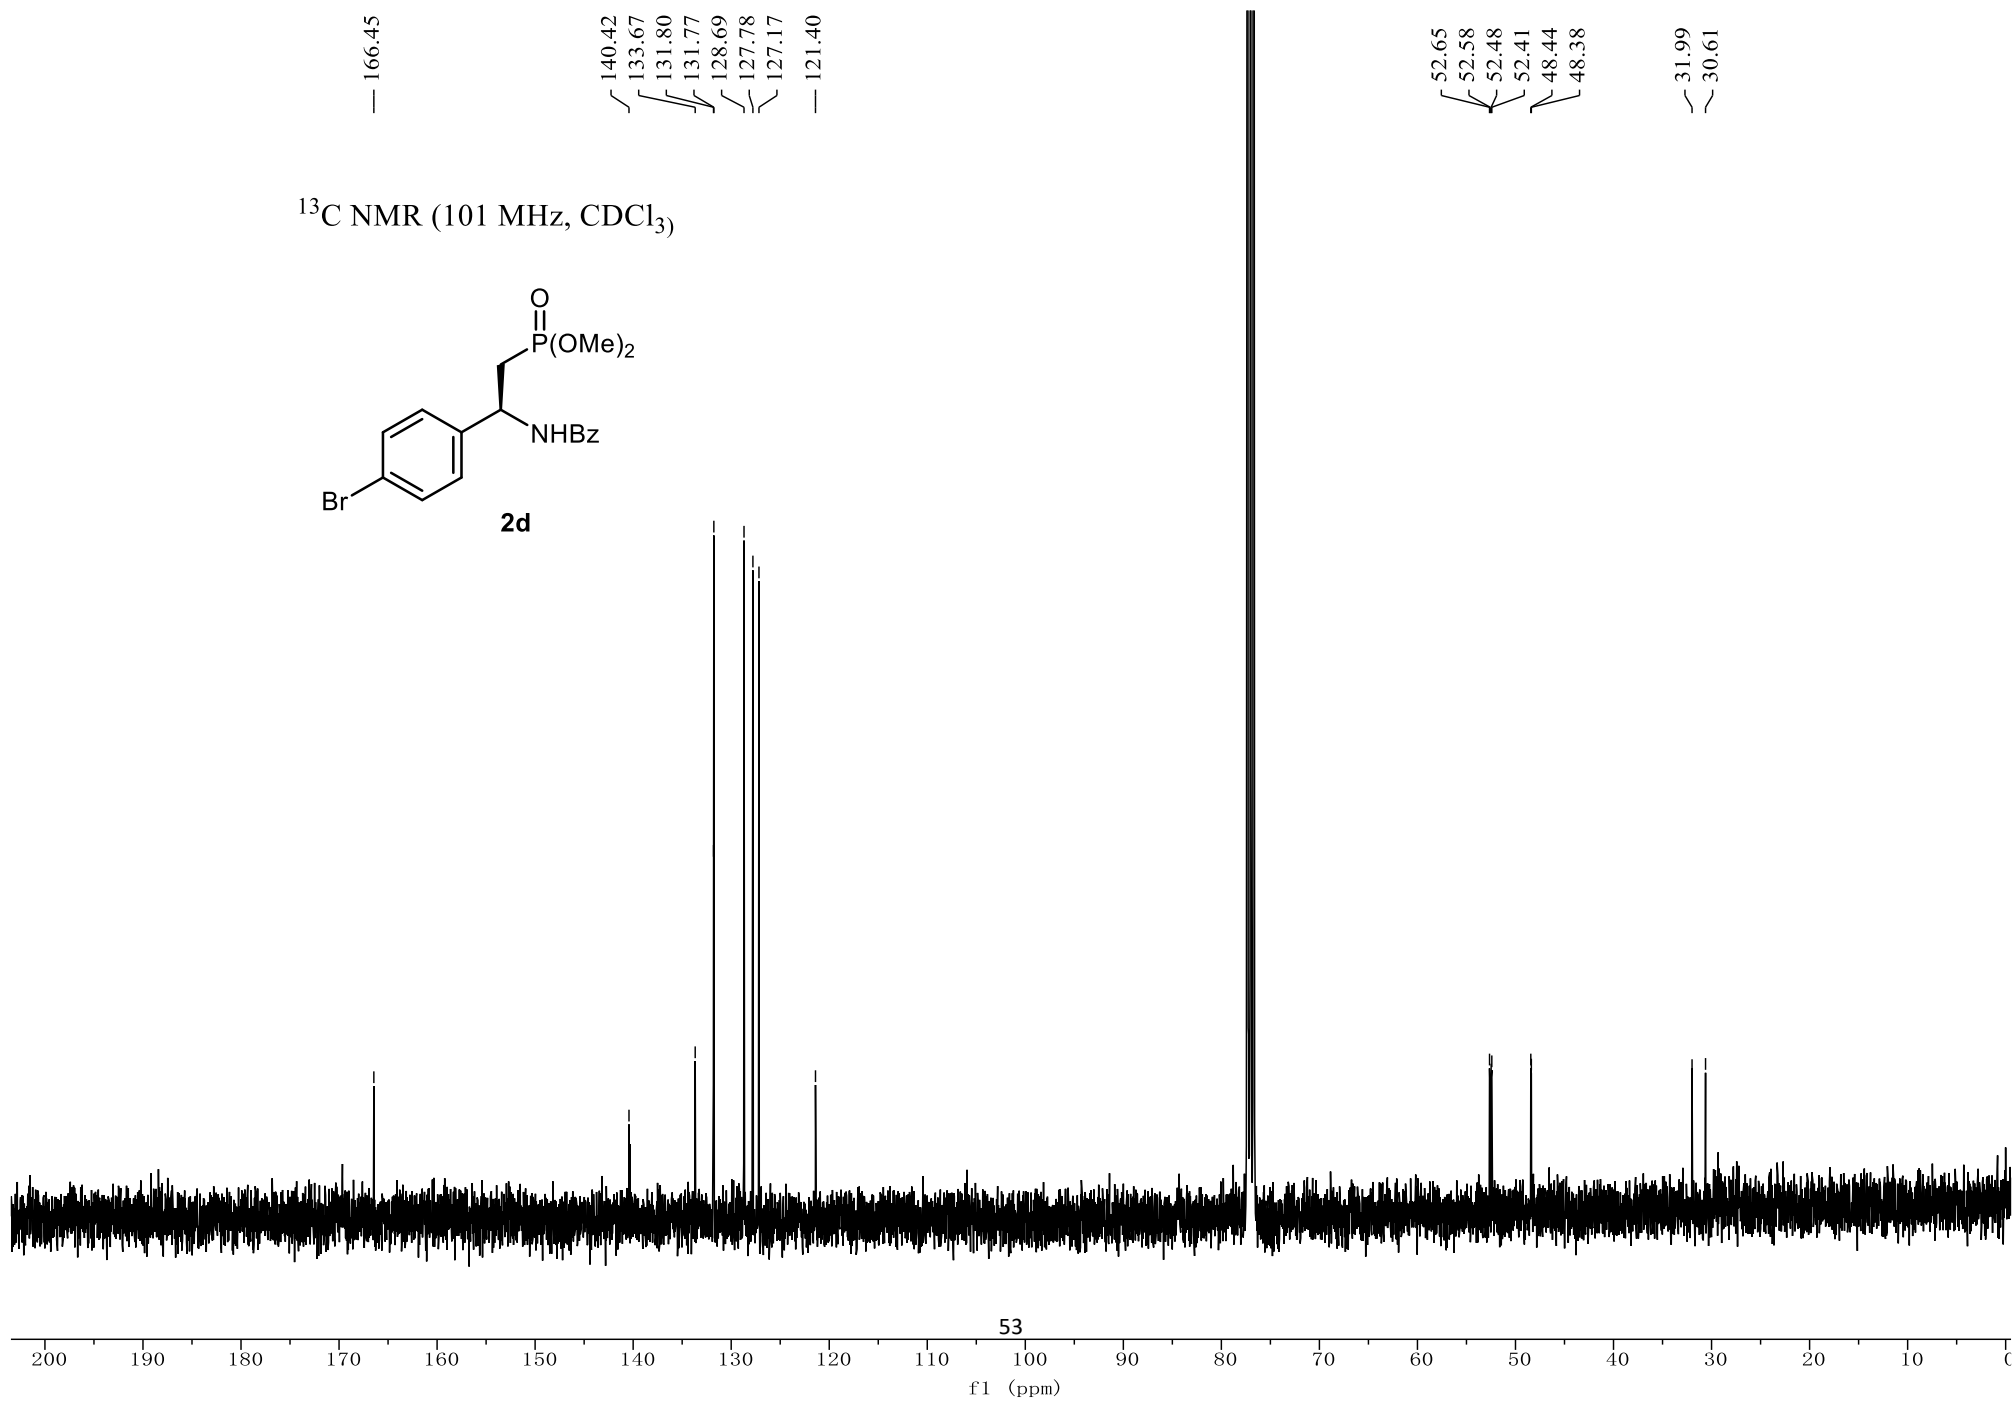

$^{31}\text{P}$  NMR (162 MHz,  $\text{CDCl}_3$ )

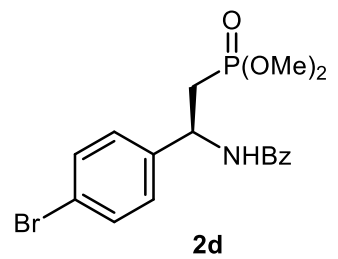

— 30.38

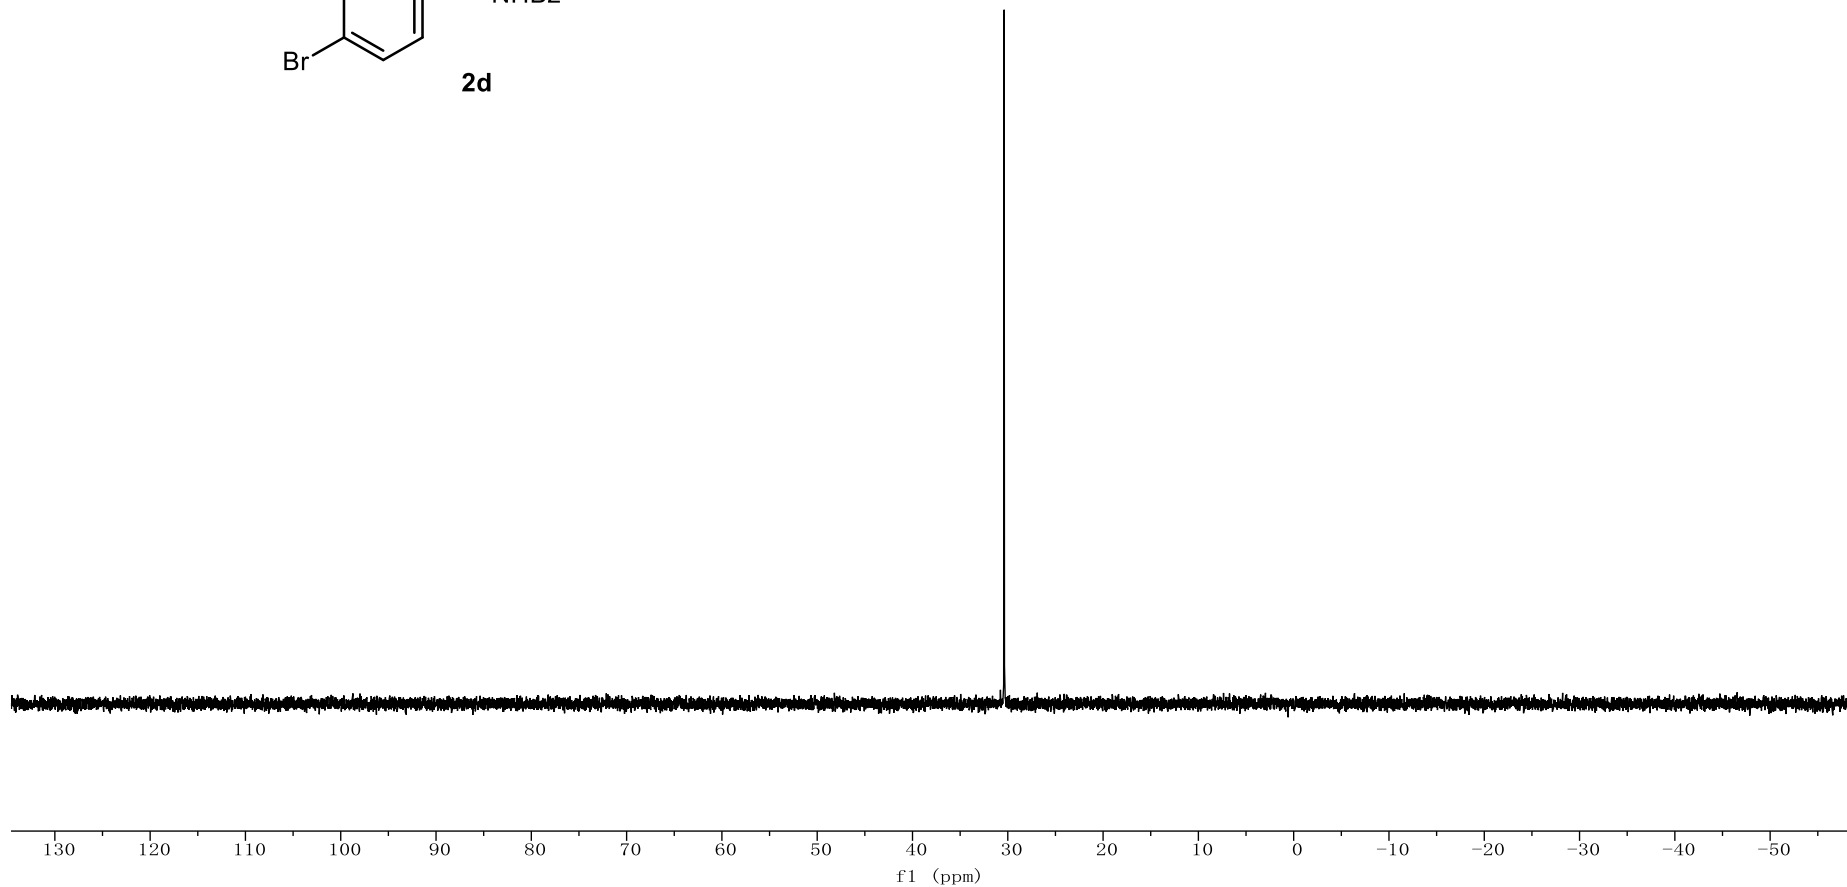

8.09  
8.07  
7.92  
7.90  
7.50  
7.48  
7.46  
7.43  
7.41  
7.39  
7.27  
7.25  
7.14  
7.12

5.61  
5.59  
5.57  
5.56  
5.54  
5.53  
5.51  
5.49

3.70  
3.68  
3.44  
3.41

2.53  
2.51  
2.49  
2.47  
2.44  
2.43  
2.41  
2.38  
2.37  
2.31

$^1\text{H}$  NMR (400 MHz,  $\text{CDCl}_3$ )

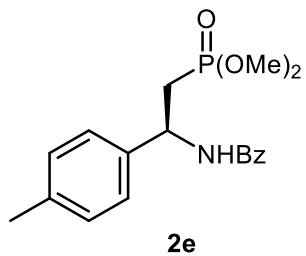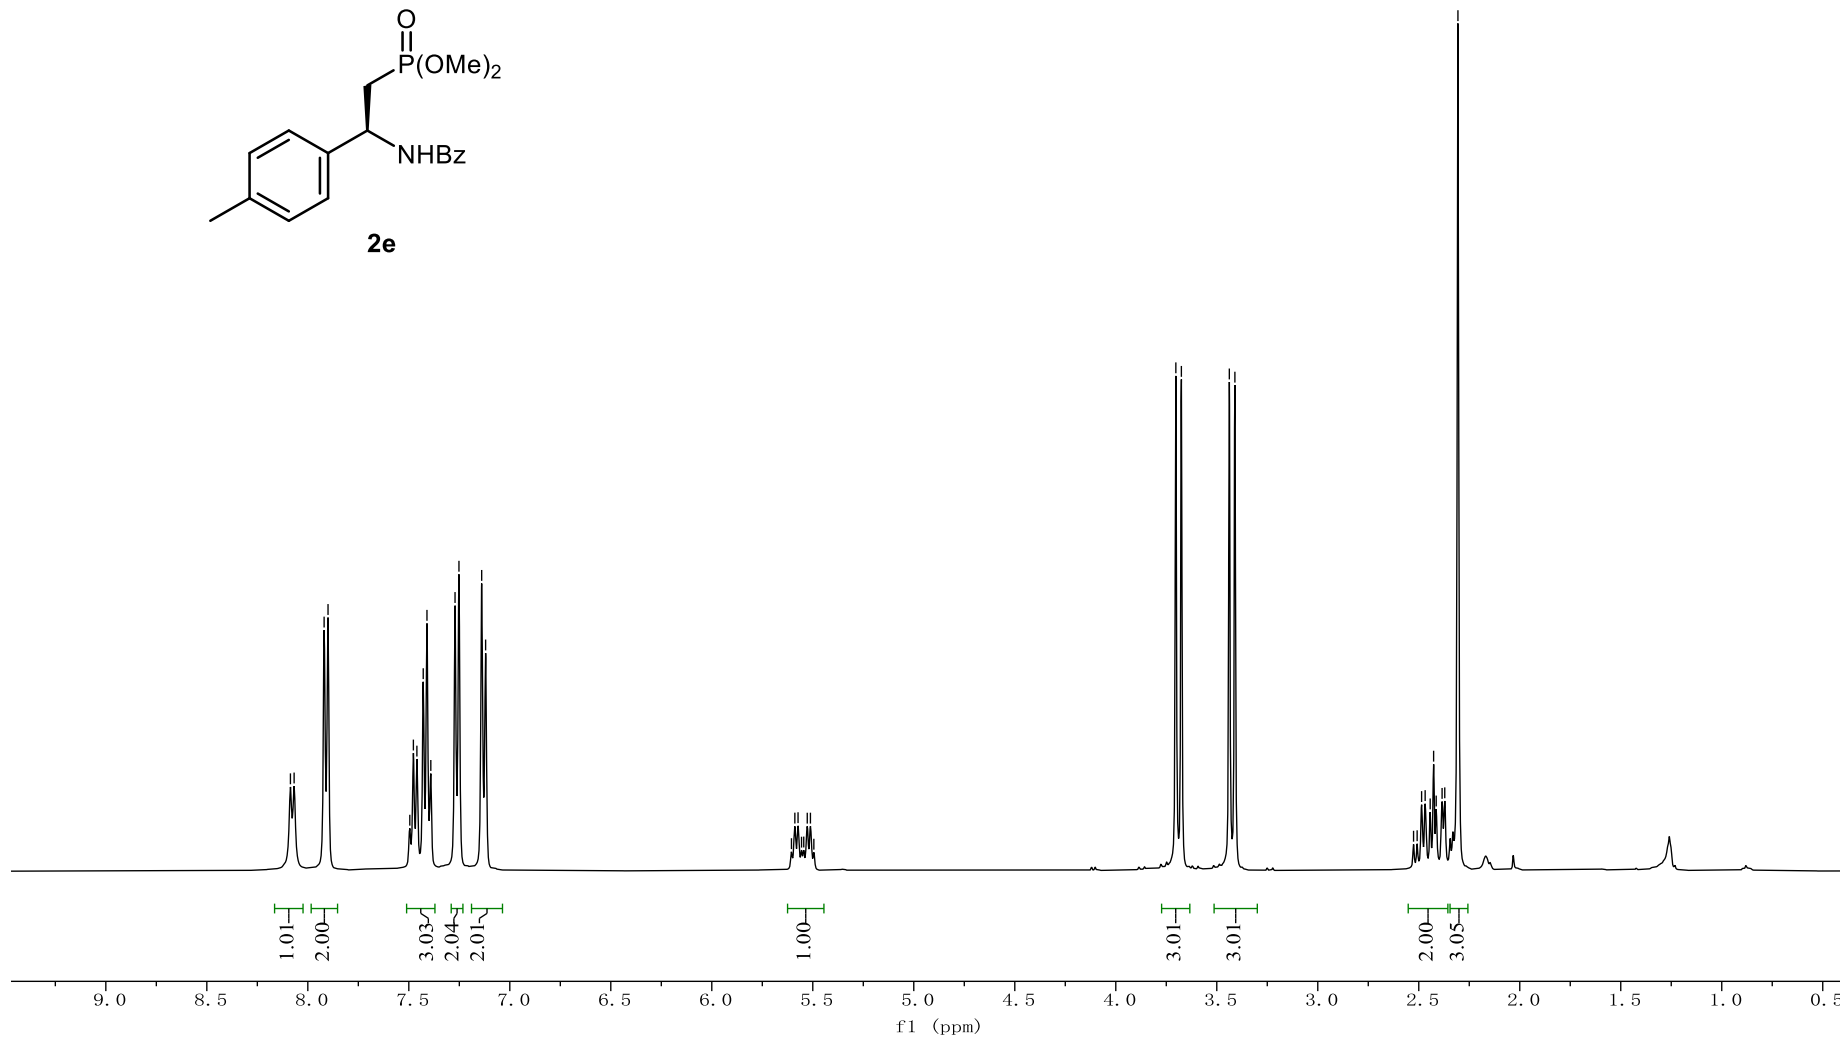



$^{13}\text{C}$  NMR (101 MHz,  $\text{CDCl}_3$ )

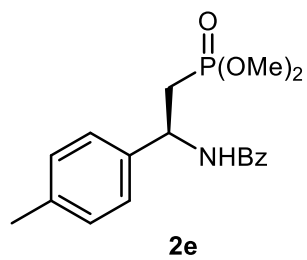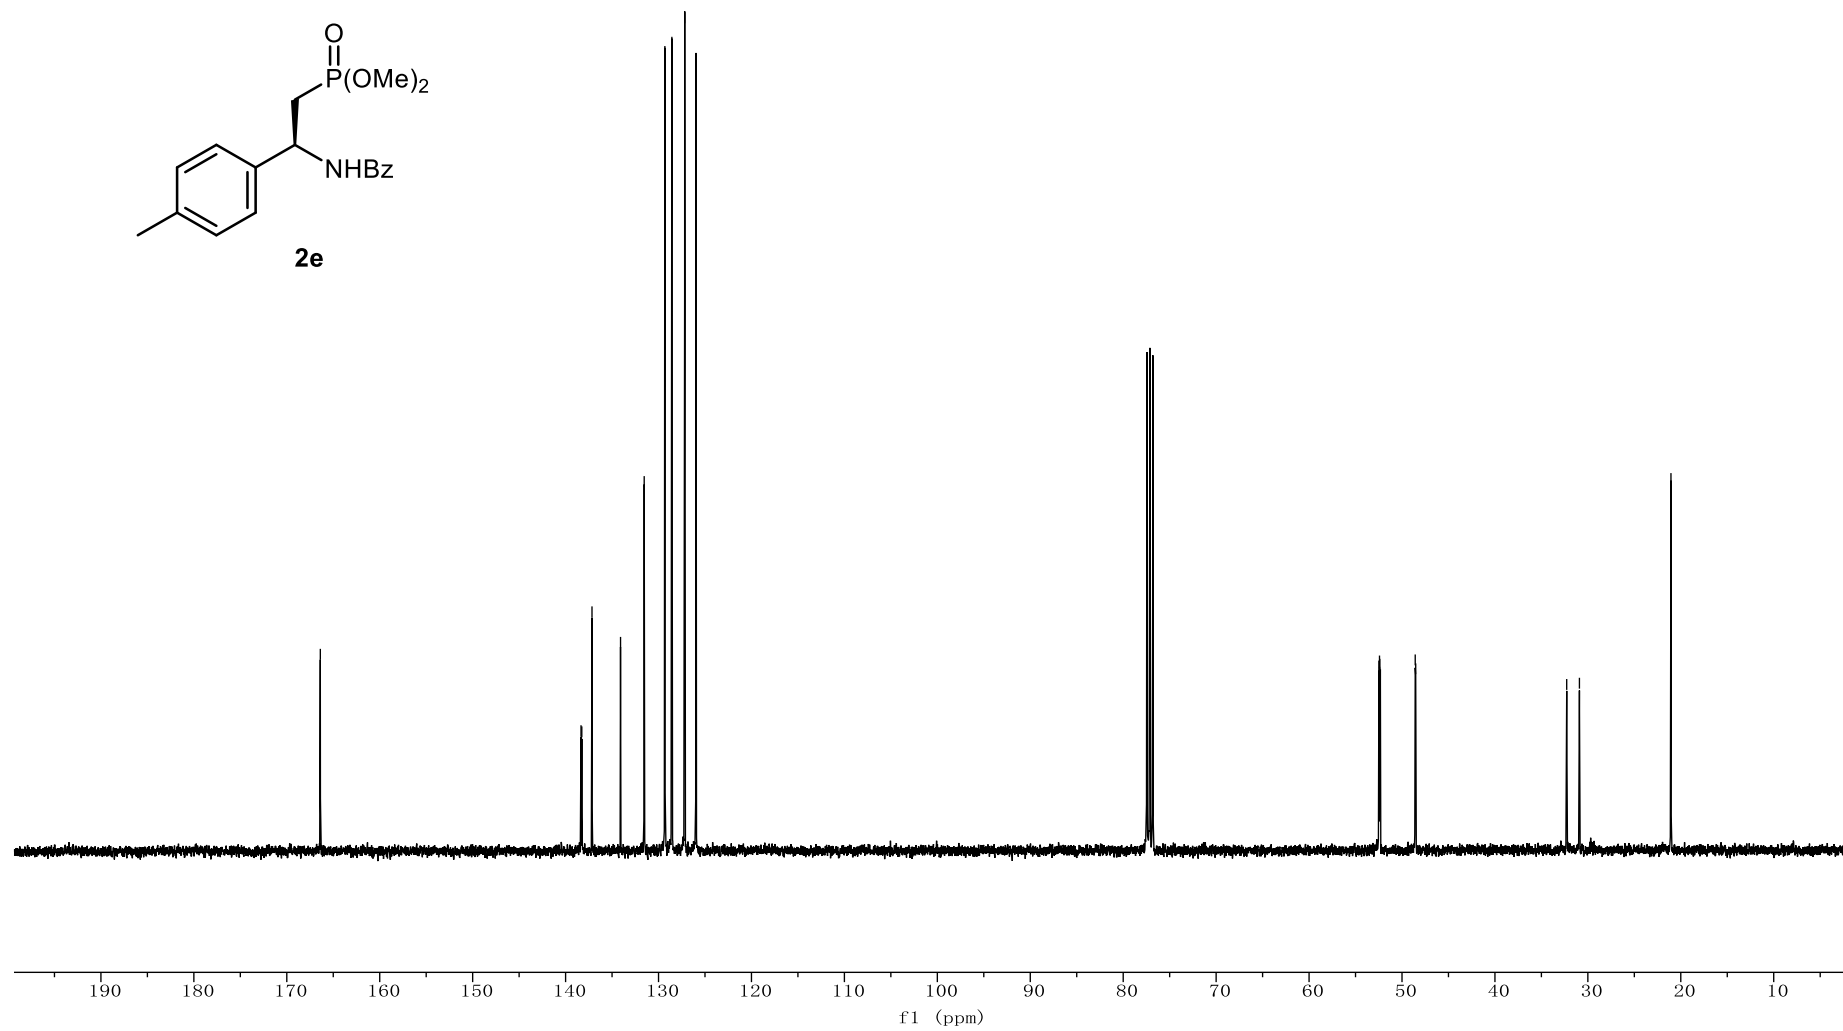

$^{31}\text{P}$  NMR (162 MHz,  $\text{CDCl}_3$ )

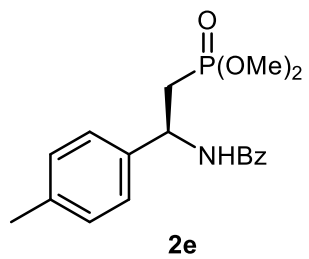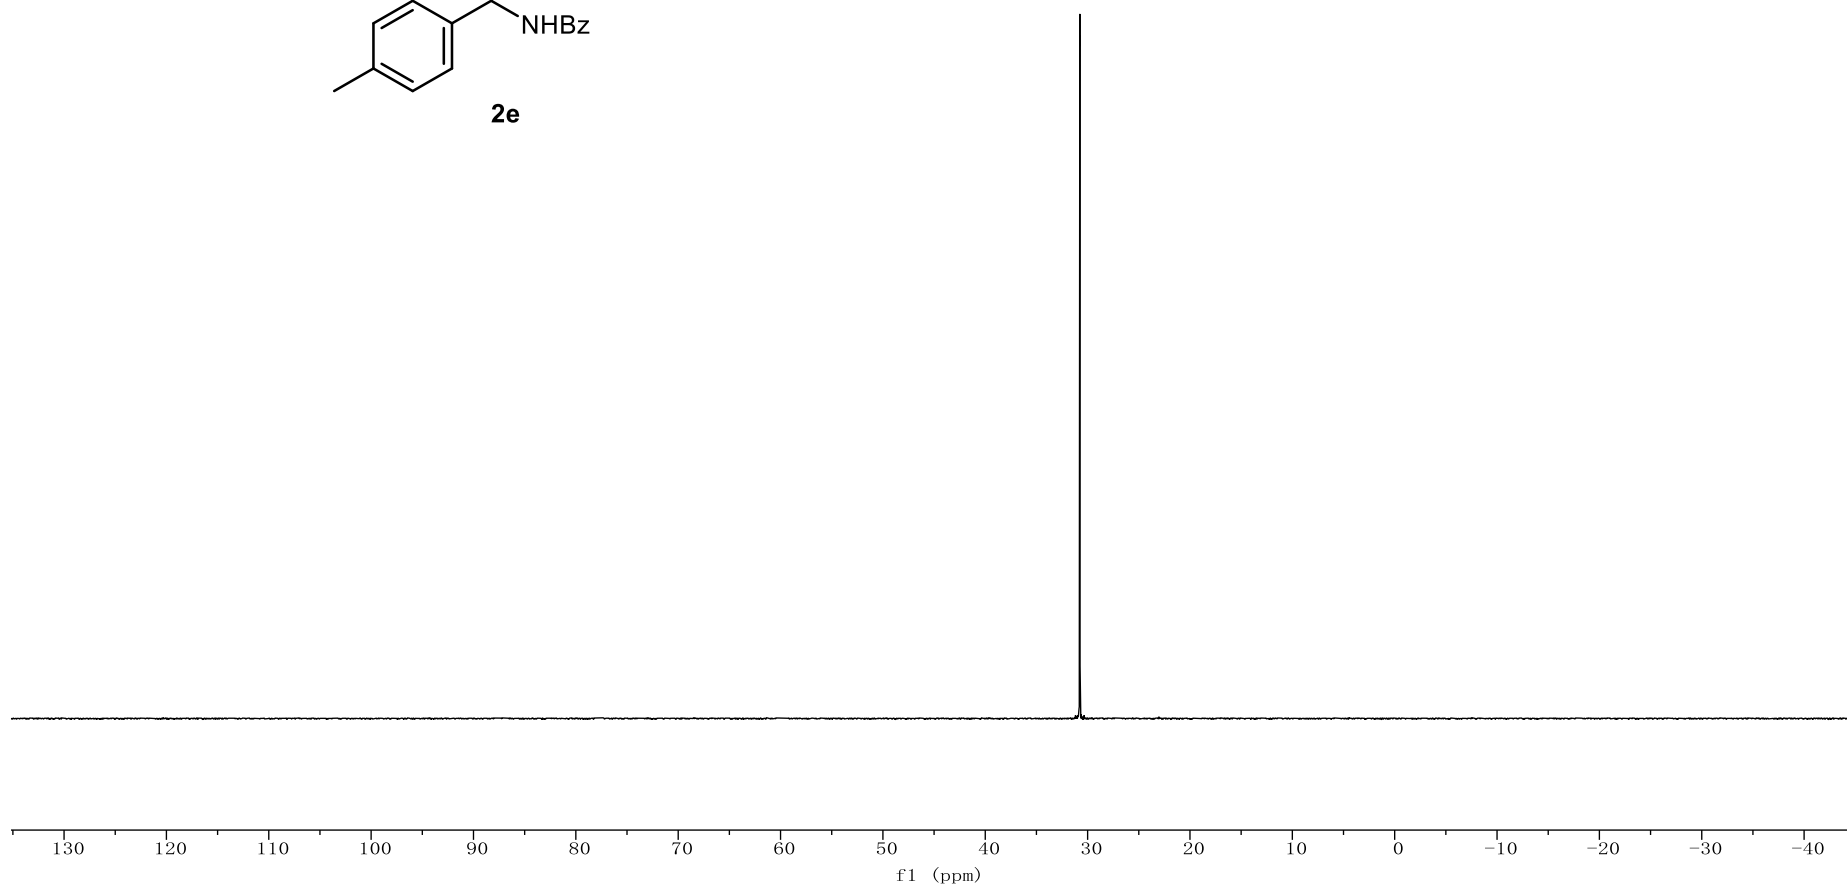

8.00  
7.98  
7.94  
7.93  
7.93  
7.92  
7.91  
7.91  
7.91  
7.52  
7.52  
7.51  
7.50  
7.50  
7.49  
7.49  
7.48  
7.46  
7.46  
7.45  
7.44  
7.44  
7.43  
7.43  
7.42  
7.42  
7.33  
7.32  
7.31  
7.30  
7.30  
7.29  
7.29  
6.89  
6.86

2.52  
2.51  
2.49  
2.48  
2.47  
2.46  
2.44  
2.43  
2.42  
2.41  
2.40  
2.39  
2.39  
2.36  
2.35

$^1\text{H}$  NMR (400 MHz,  $\text{CDCl}_3$ )

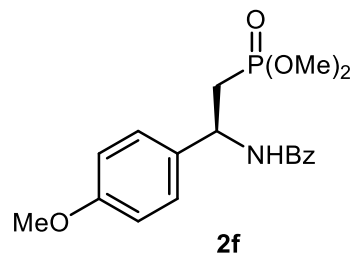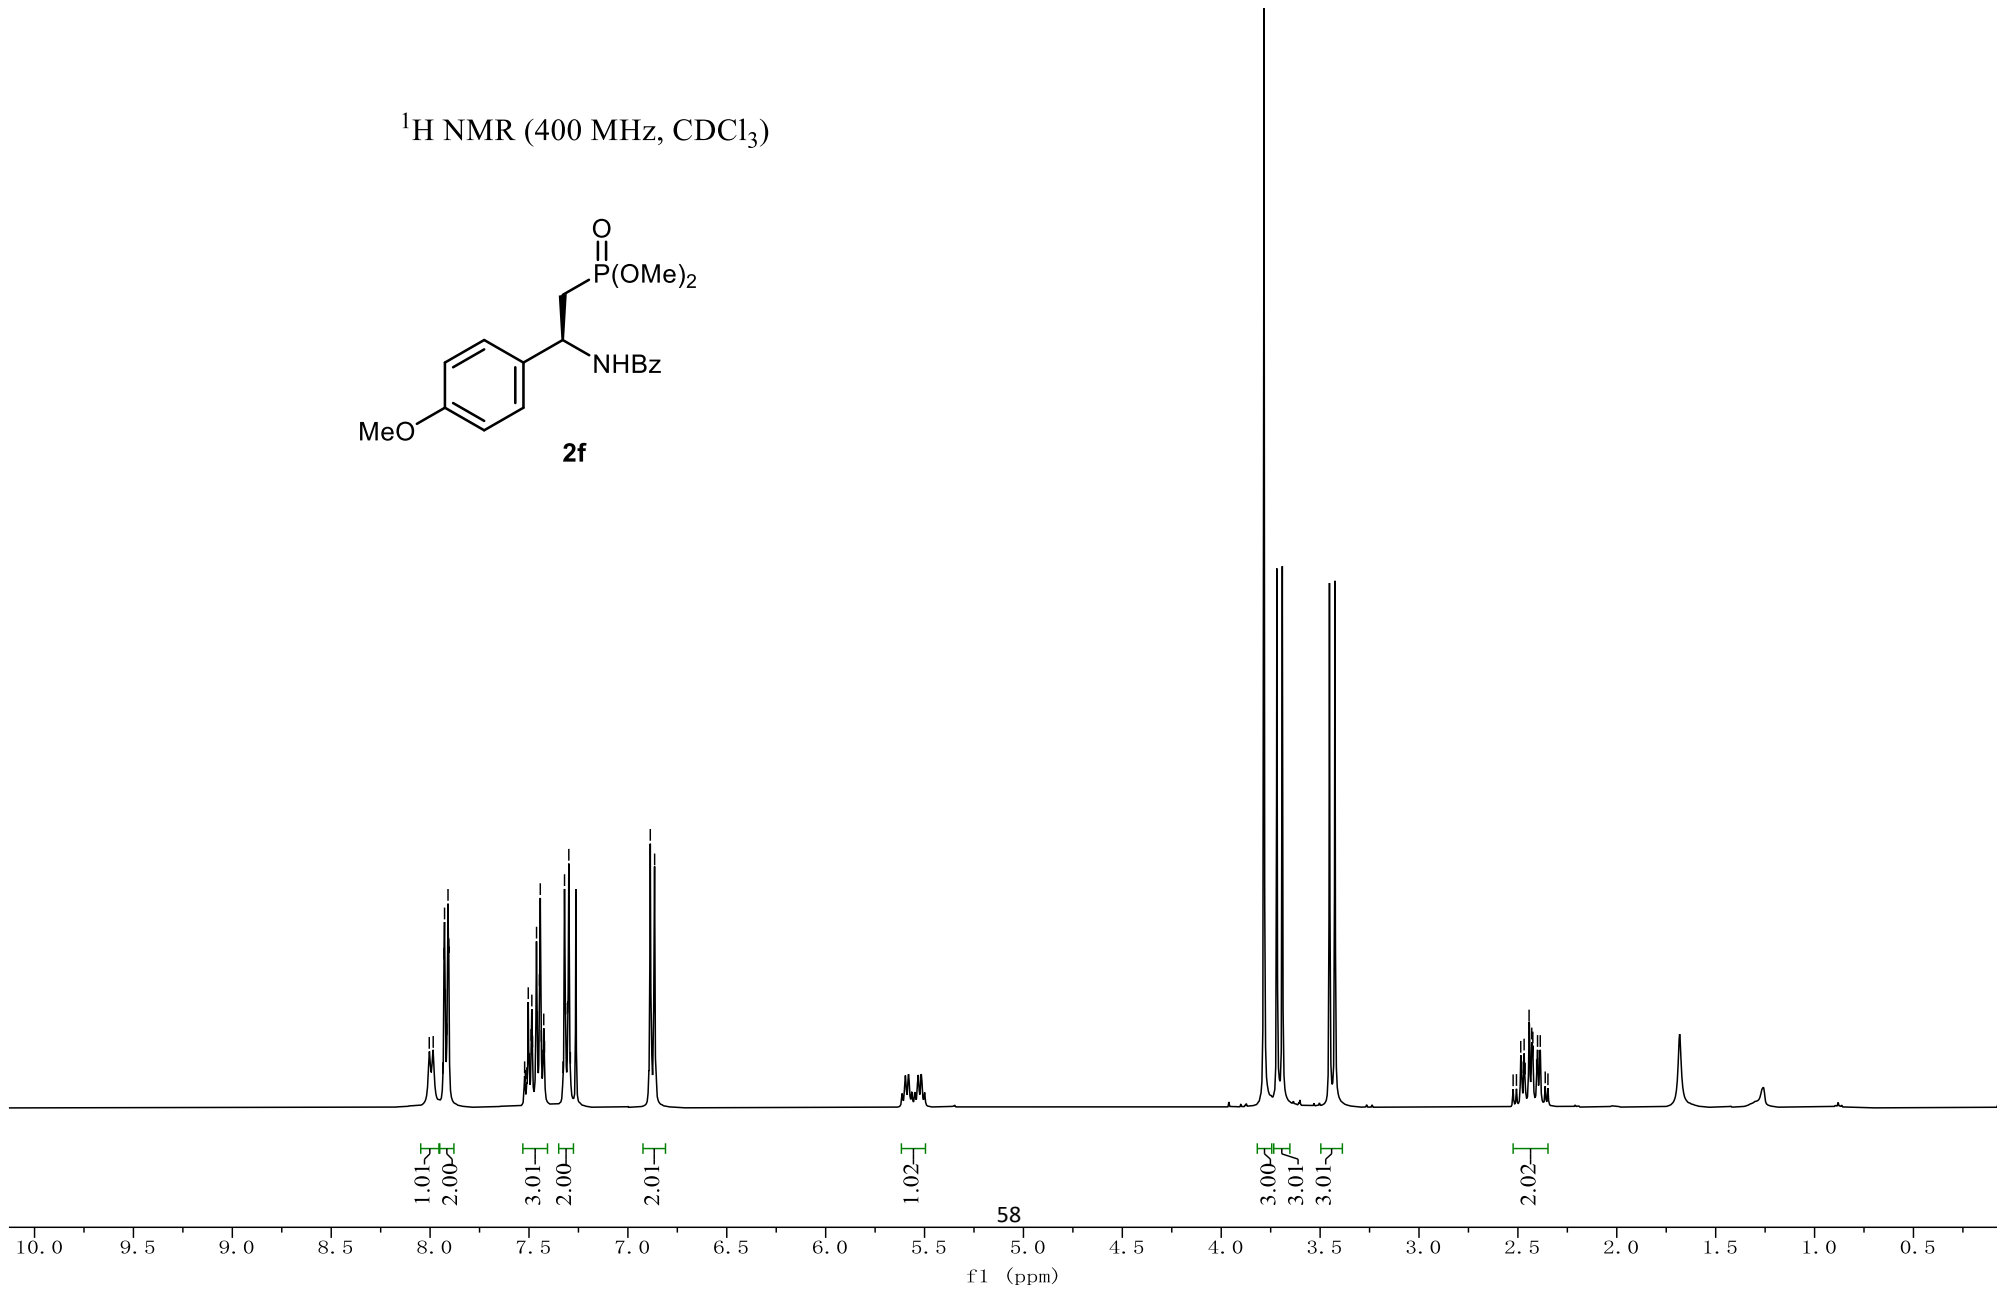

<sup>13</sup>C NMR (101 MHz, CDCl<sub>3</sub>)

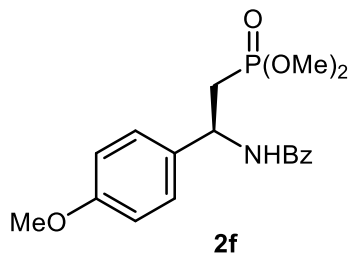

— 166.36

— 158.97

134.04

133.30

133.22

131.61

128.62

127.22

127.15

— 114.06

55.32

52.48

52.45

52.41

52.38

48.28

48.22

32.30

30.93

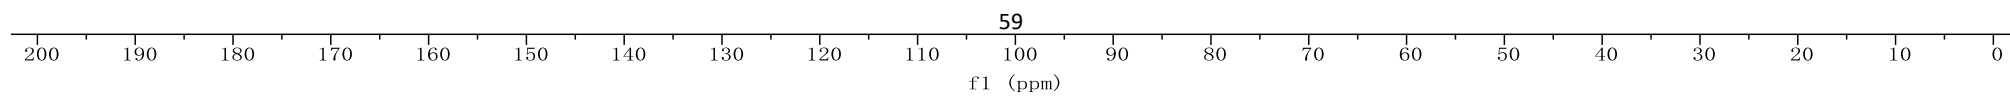

— 30.87

$^{31}\text{P}$  NMR (162 MHz,  $\text{CDCl}_3$ )

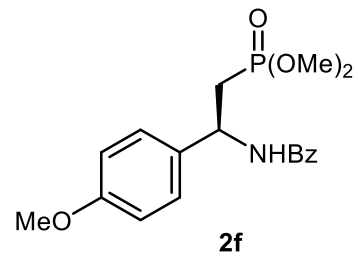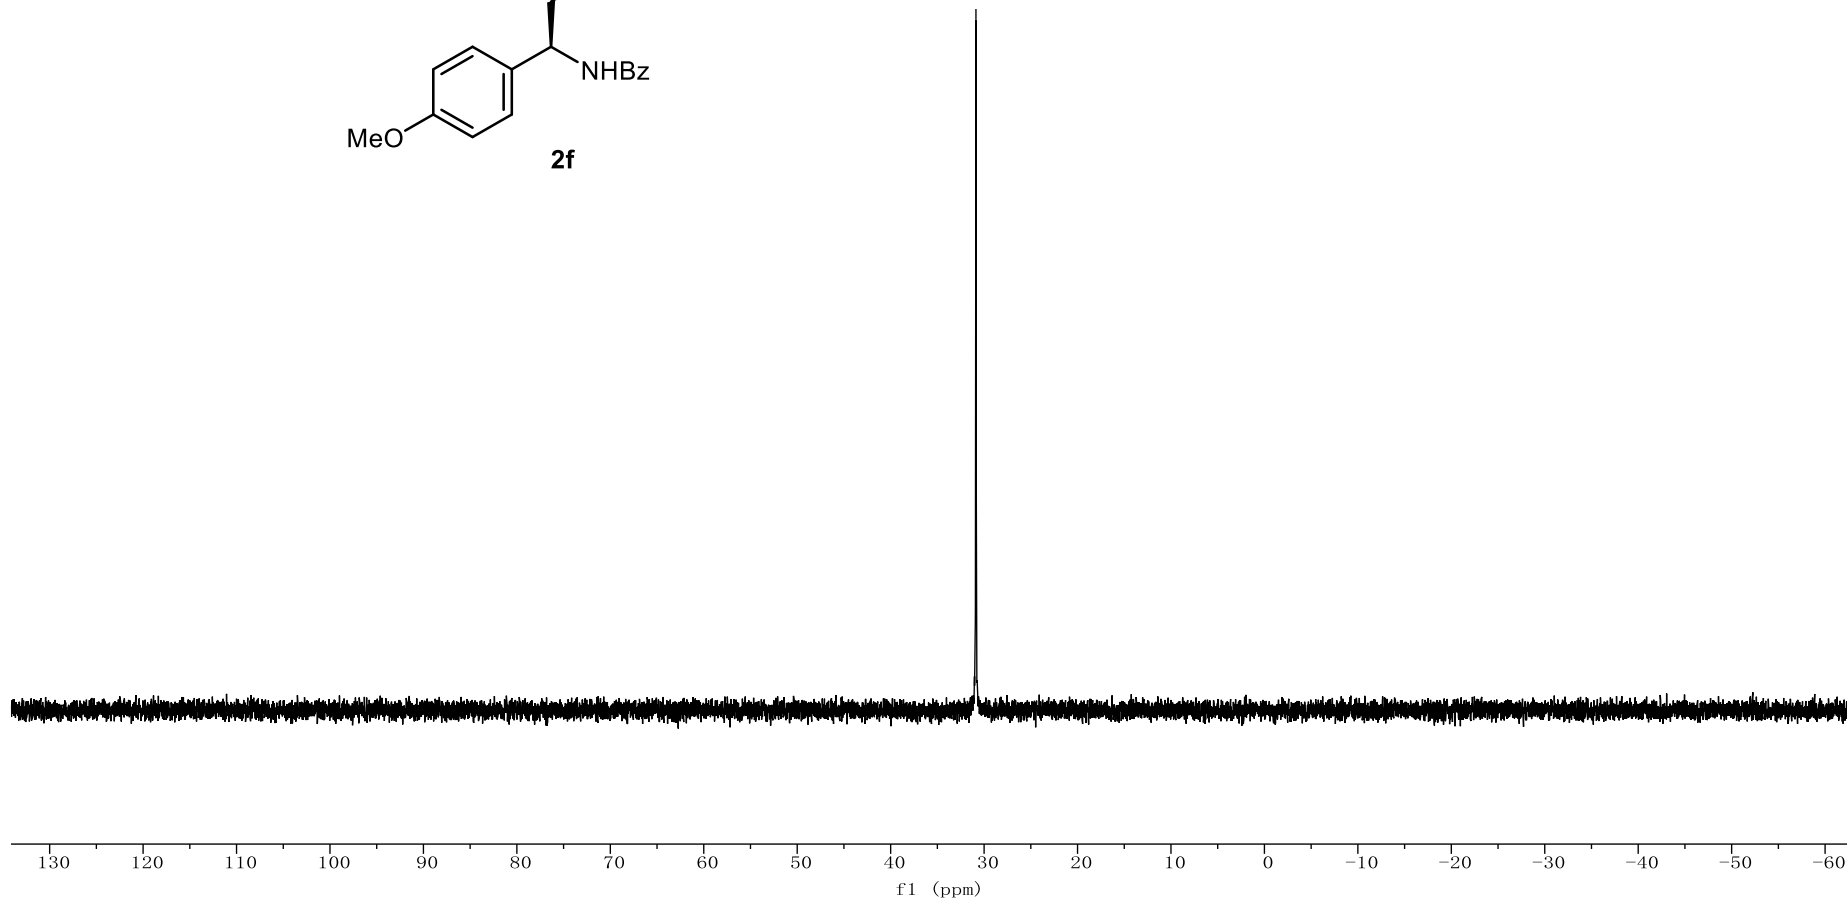

8.44  
8.42  
7.96  
7.94  
7.53  
7.51  
7.49  
7.47  
7.45  
7.43  
7.38  
7.36  
7.25  
7.24  
7.22  
7.20  
7.18  
5.91  
5.90  
5.88  
5.87  
5.85  
5.83  
5.82  
5.80

3.75  
3.72  
3.44  
3.41  
2.64  
2.62  
2.60  
2.58  
2.55  
2.54  
2.48  
2.47  
2.44  
2.43  
2.40  
2.39

<sup>1</sup>H NMR (400 MHz, CDCl<sub>3</sub>)

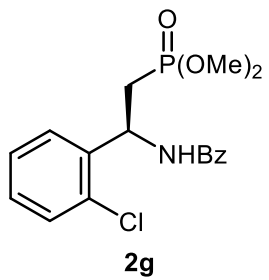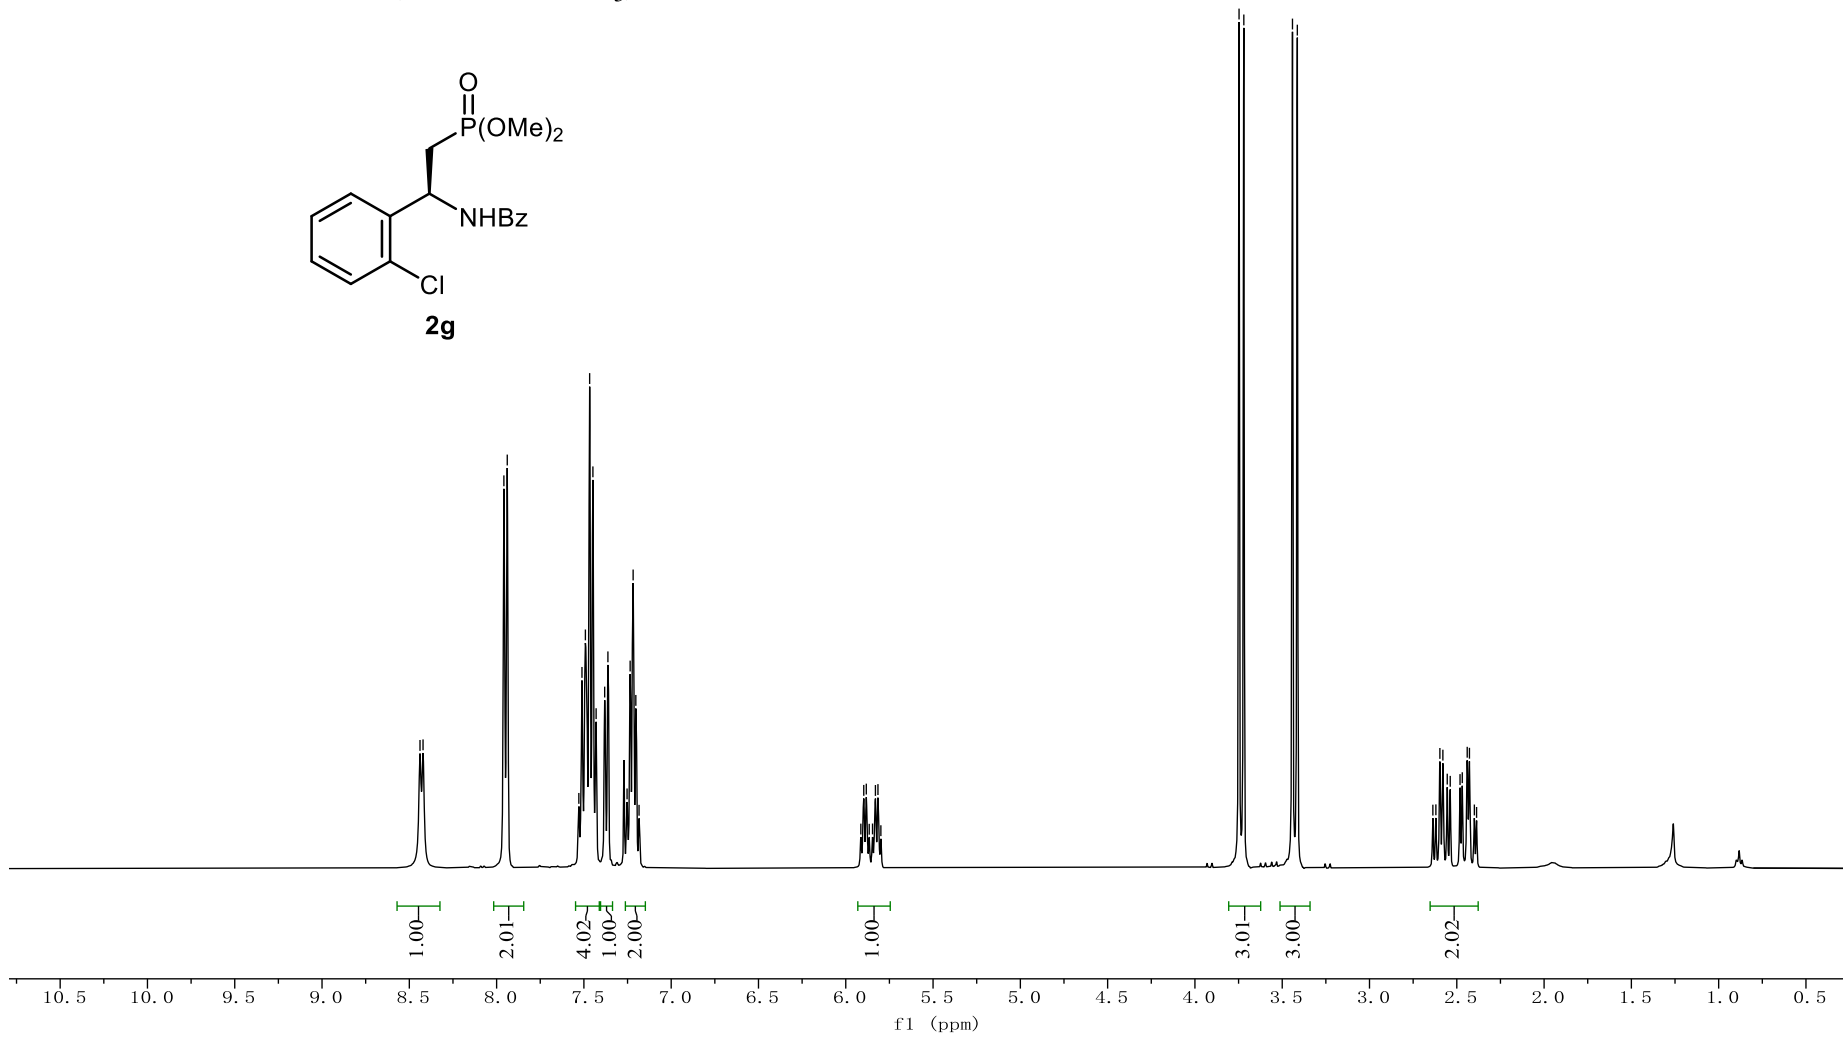

$^{13}\text{C}$  NMR (101 MHz,  $\text{CDCl}_3$ )

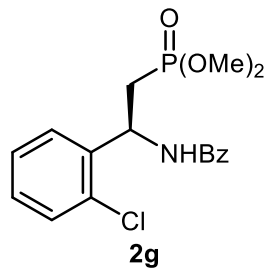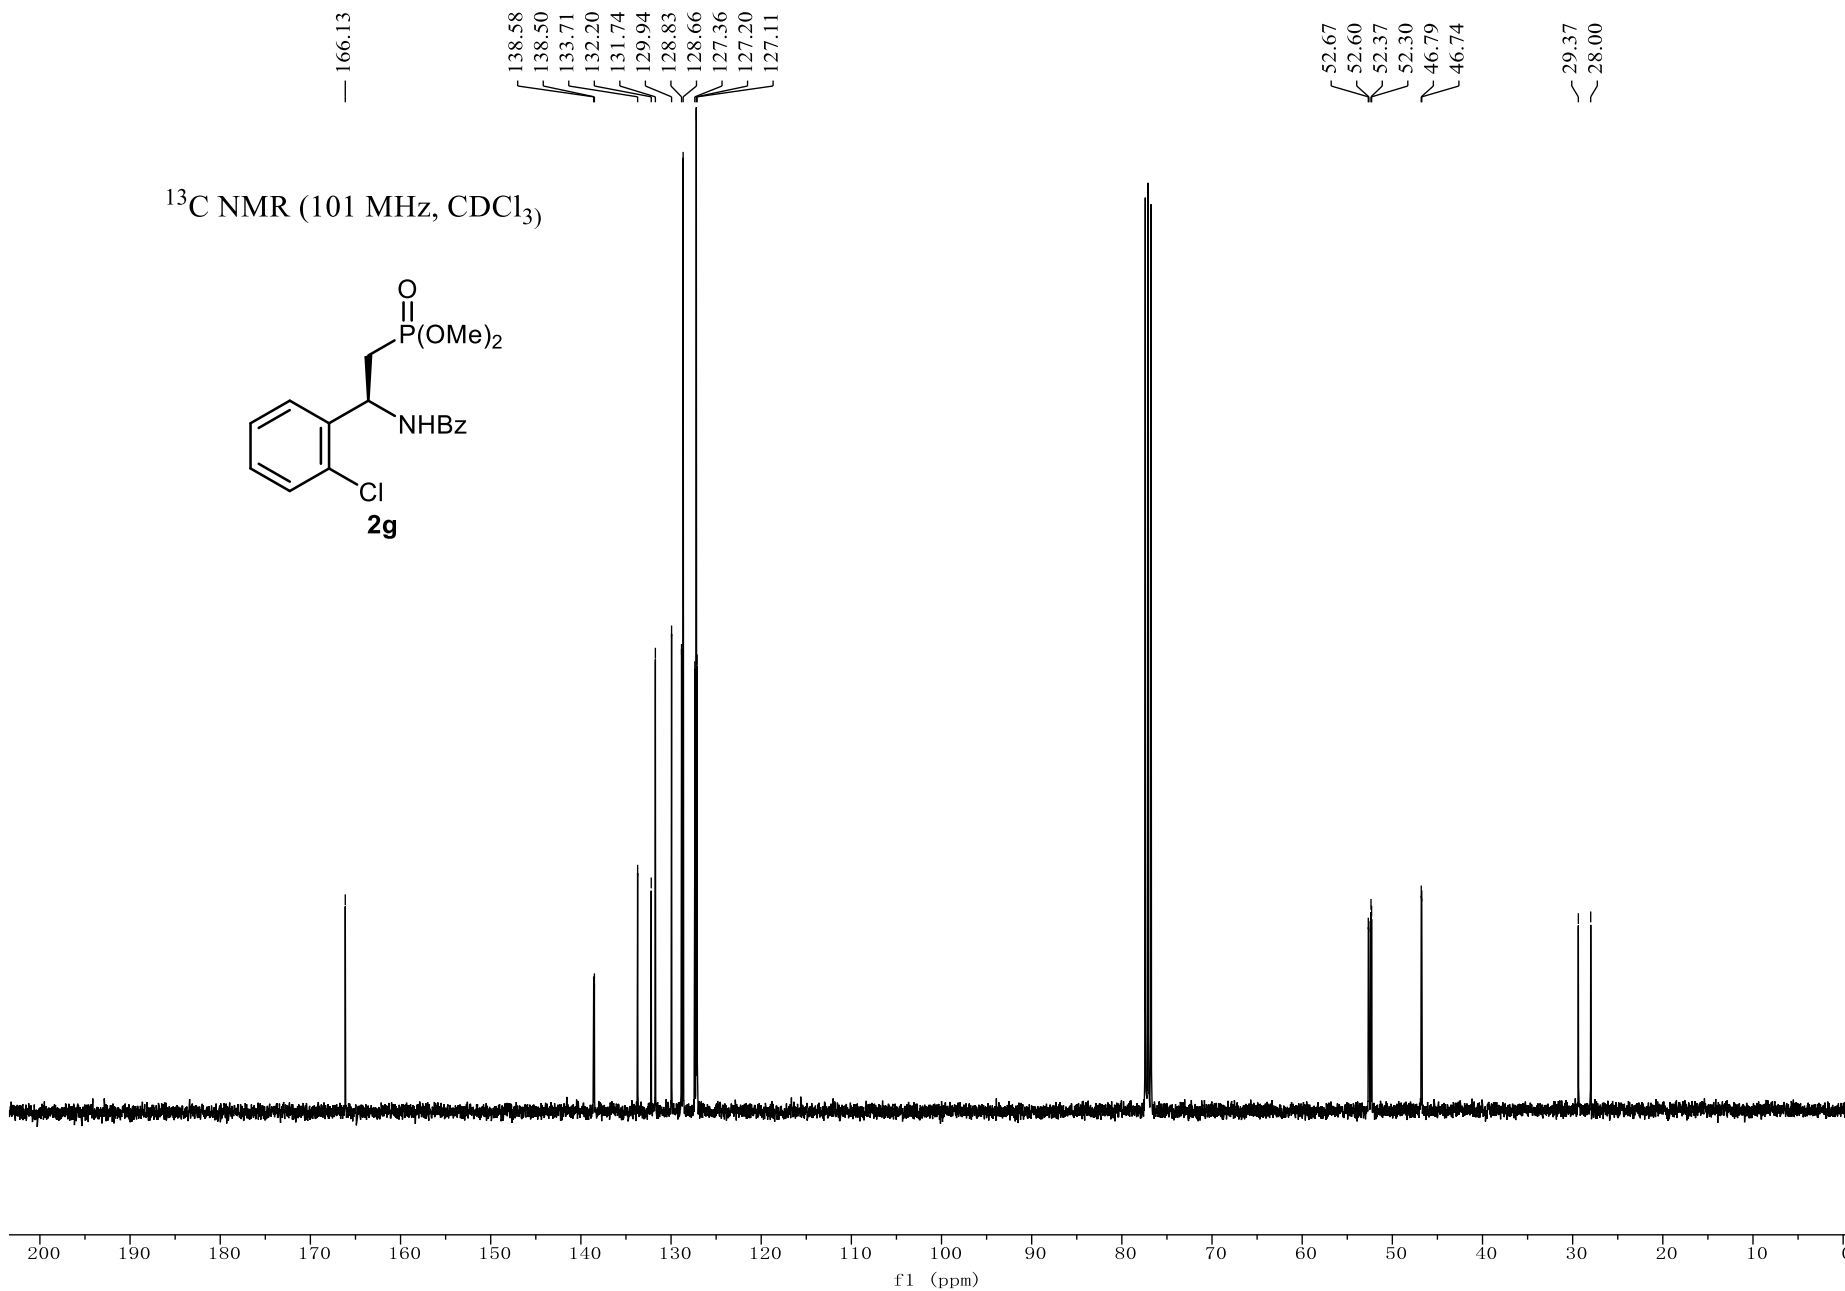

$^{31}\text{P}$  NMR (162 MHz,  $\text{CDCl}_3$ )

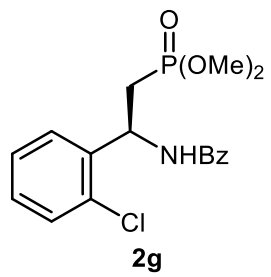

— 30.67

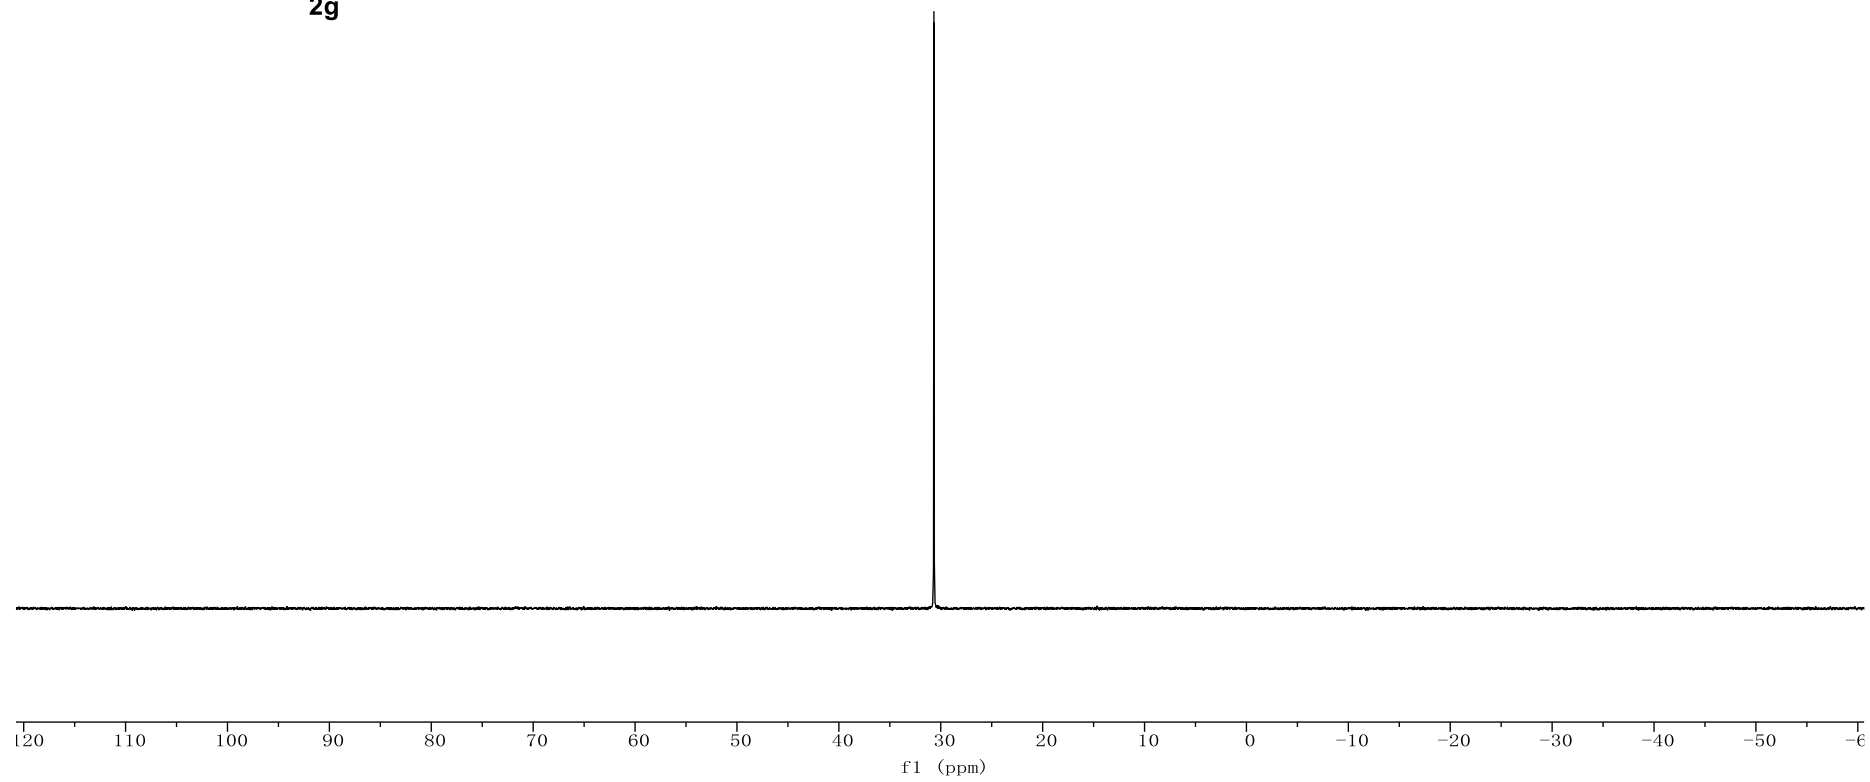

63



8.22  
8.20  
7.95  
7.95  
7.94  
7.93  
7.93  
7.92

7.54  
7.54  
7.54  
7.53  
7.52  
7.52  
7.51  
7.50  
7.50  
7.48  
7.47  
7.46  
7.46  
7.45  
7.45  
7.44  
7.44  
7.38  
7.37  
7.30  
7.29  
7.28  
7.28  
7.27  
7.27  
7.26  
7.26  
7.25  
7.25  
7.24  
7.24  
7.23  
7.23  
7.22  
7.22  
5.62  
5.61  
5.59  
5.57  
5.56  
5.54  
5.52  
5.51  
3.74  
3.71  
3.49  
3.46  
2.44  
2.44  
2.43  
2.42  
2.40  
2.39  
2.38  
2.38

<sup>1</sup>H NMR (400 MHz, CDCl<sub>3</sub>)

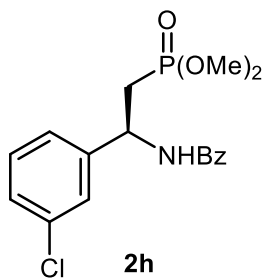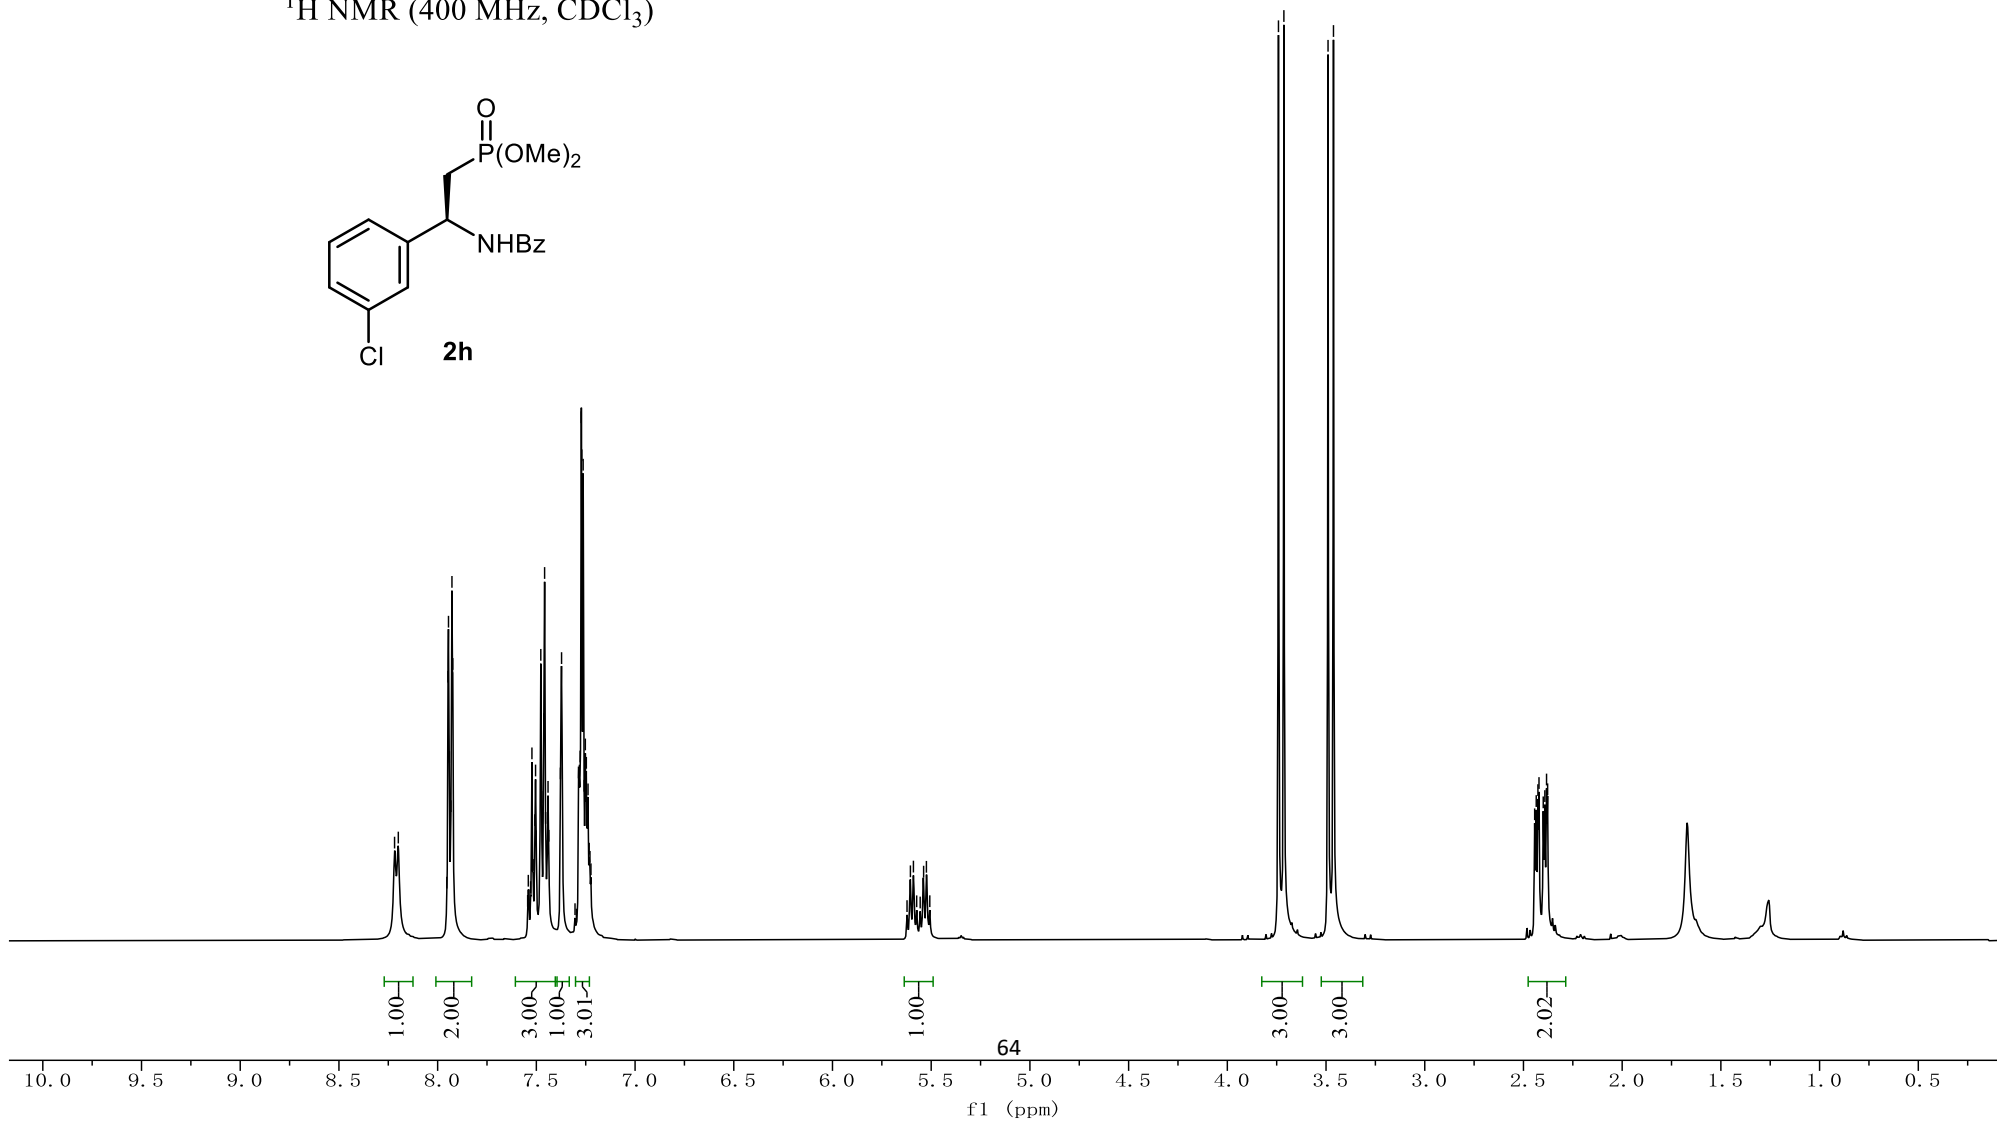

$^{13}\text{C}$  NMR (101 MHz,  $\text{CDCl}_3$ )

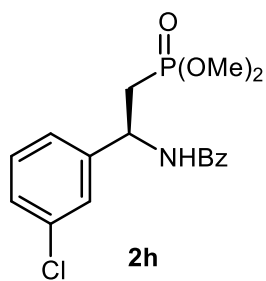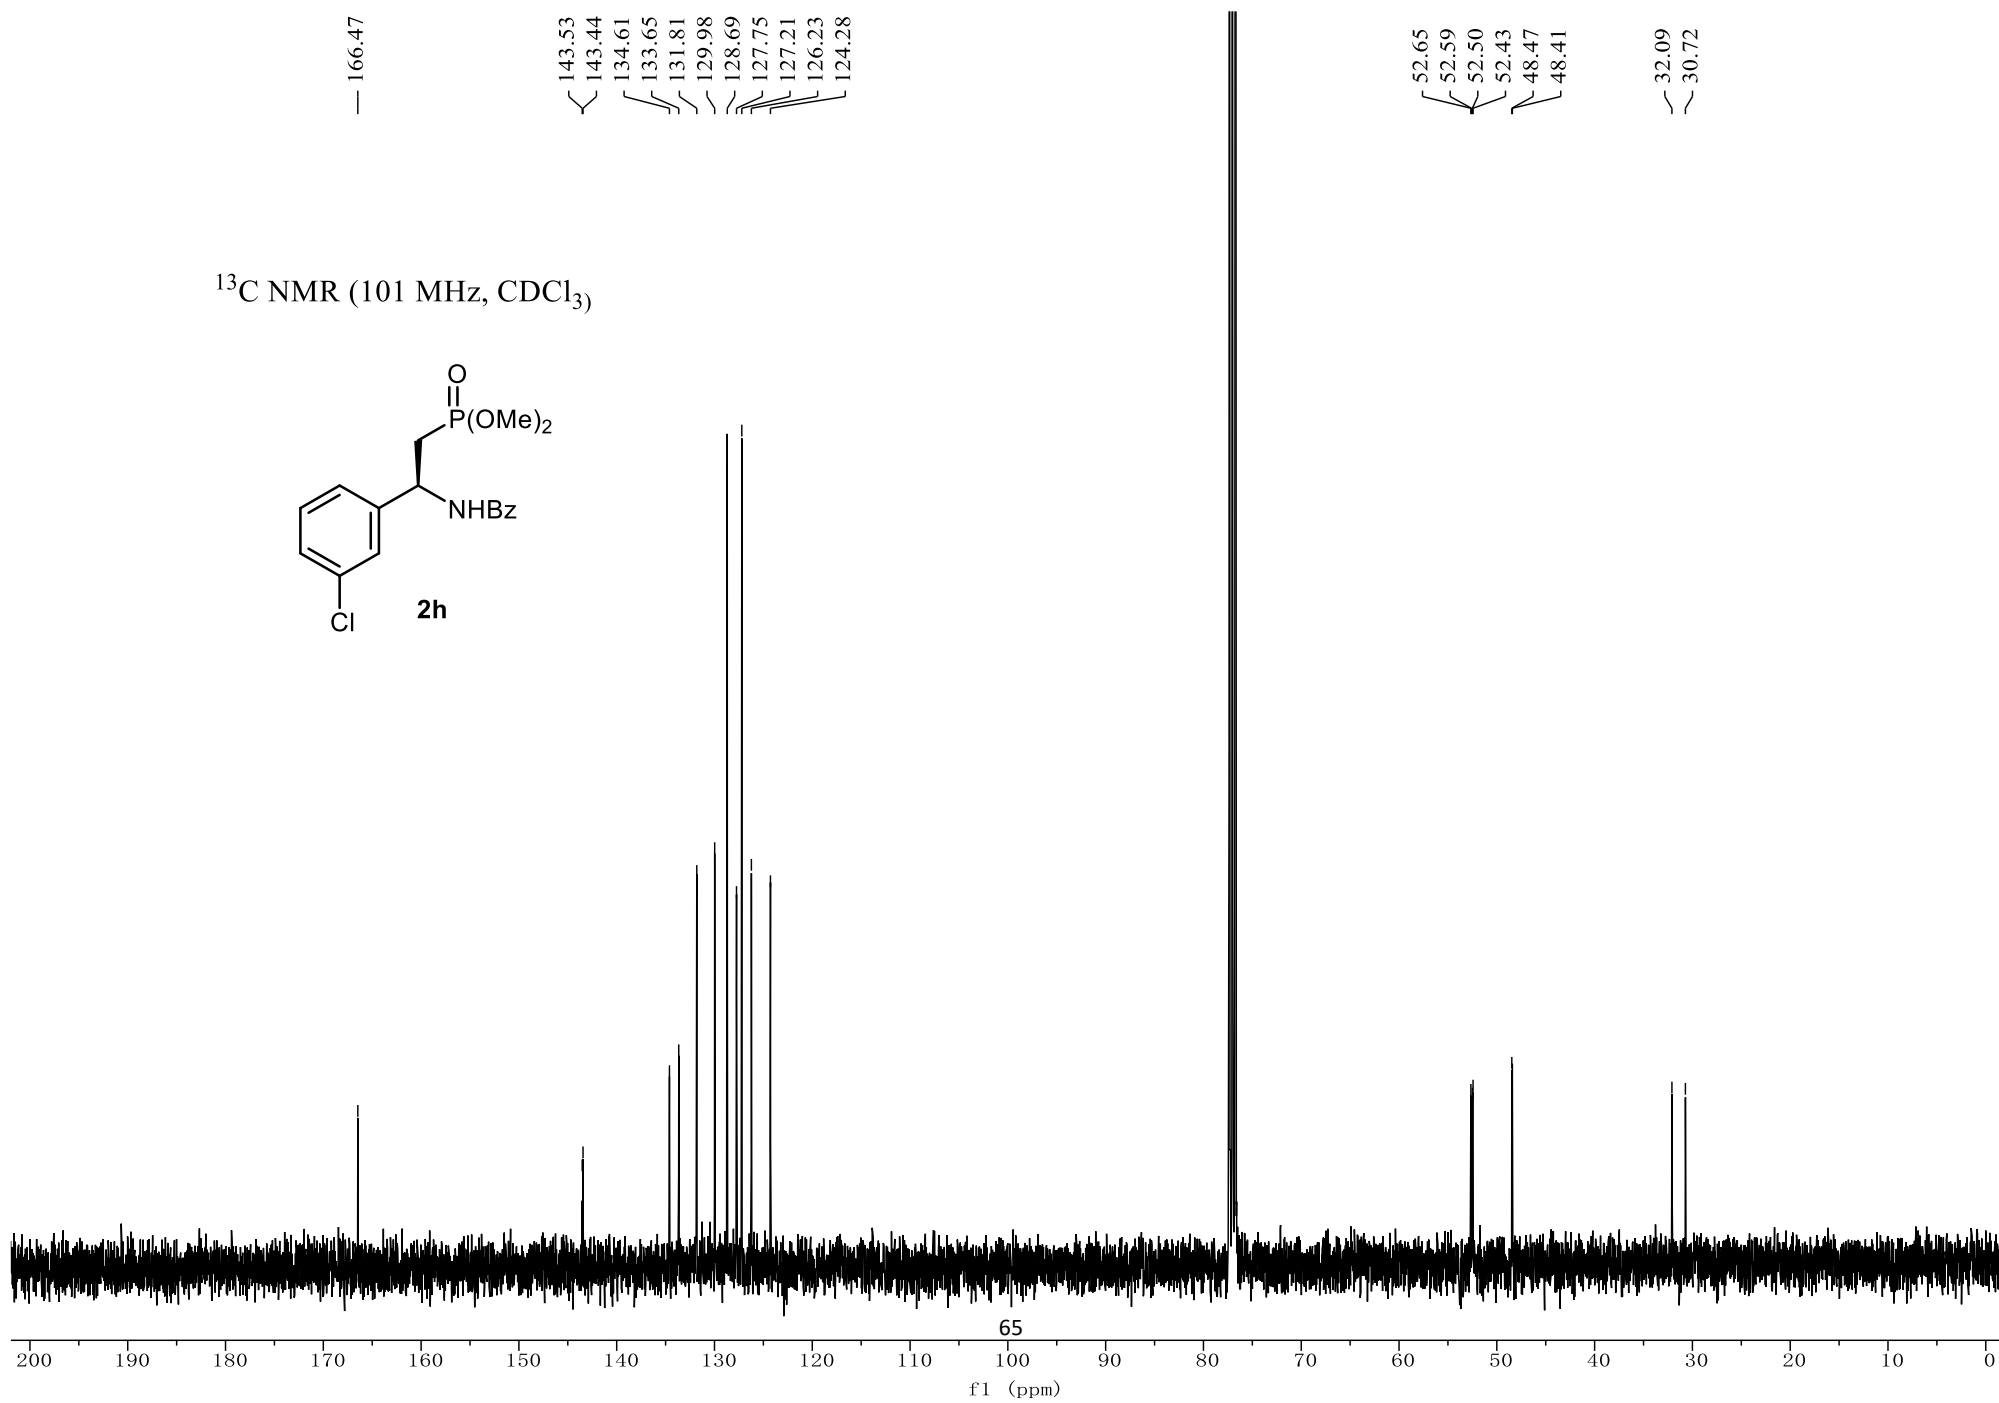

$^{31}\text{P}$  NMR (162 MHz,  $\text{CDCl}_3$ )

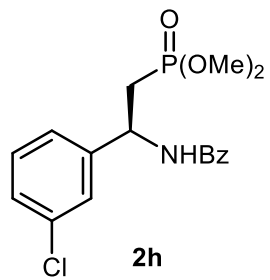

— 30.32

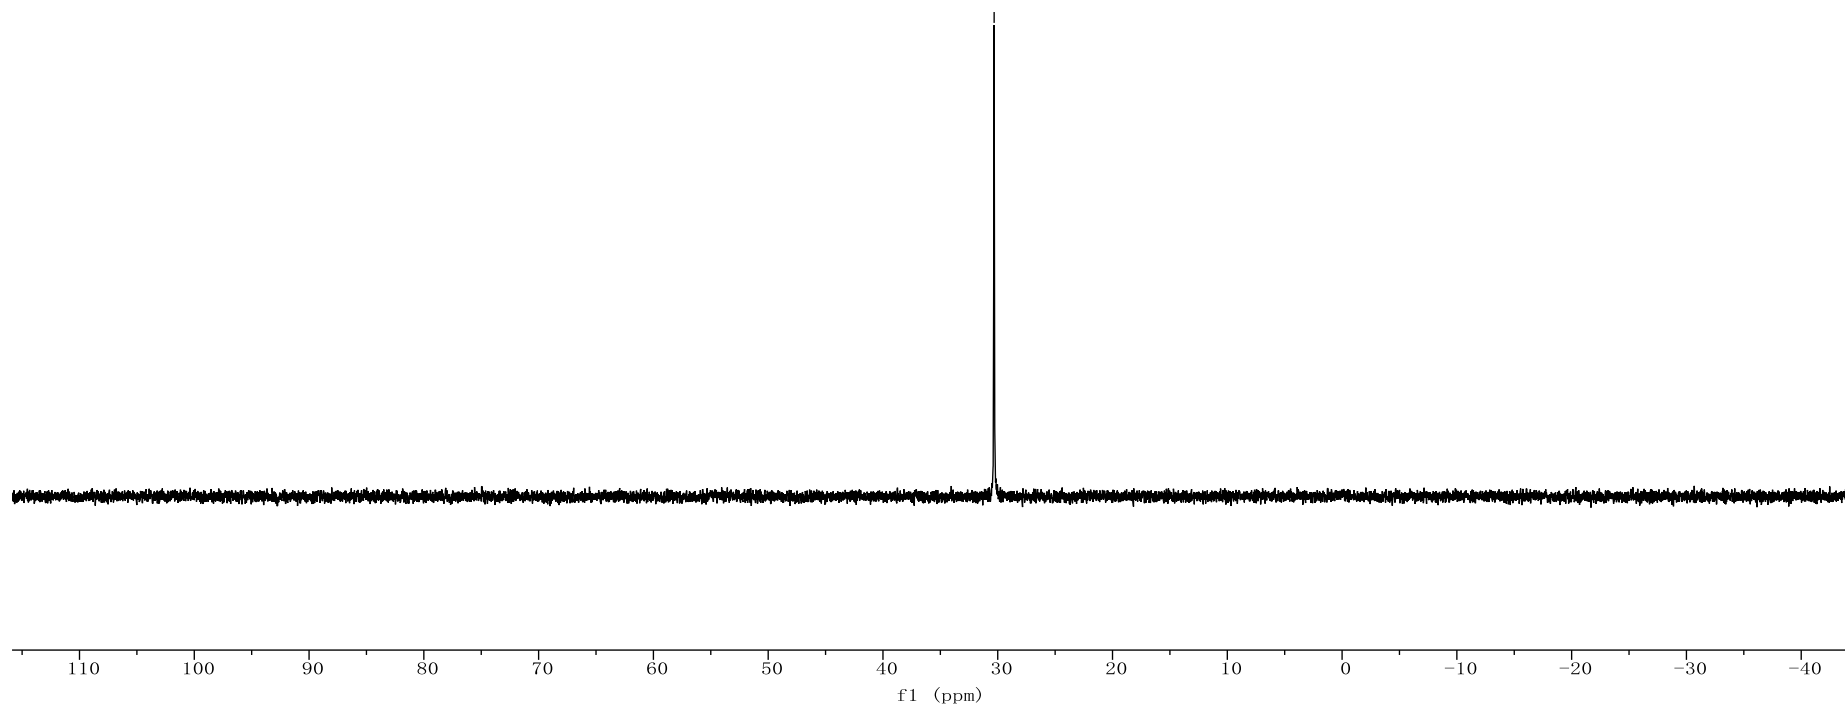

8.29  
8.27  
7.96  
7.94  
7.94  
7.83  
7.81  
7.79  
7.78  
7.78  
7.76  
7.76  
7.51  
7.50  
7.49  
7.48  
7.48  
7.47  
7.46  
7.46  
7.45  
7.44  
7.44  
7.43  
7.43  
7.41  
7.41  
5.81  
5.79  
5.78  
5.76  
5.75  
5.73  
5.71  
5.70

3.70  
3.68  
3.34  
3.31  
2.62  
2.60  
2.58  
2.57  
2.56  
2.53  
2.52  
2.51  
2.49  
2.46  
2.45  
2.43  
2.41

$^1\text{H}$  NMR (400 MHz,  $\text{CDCl}_3$ )

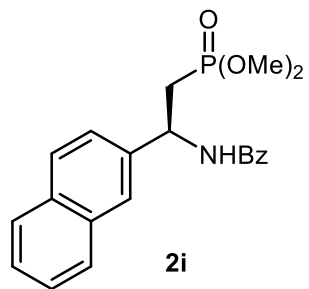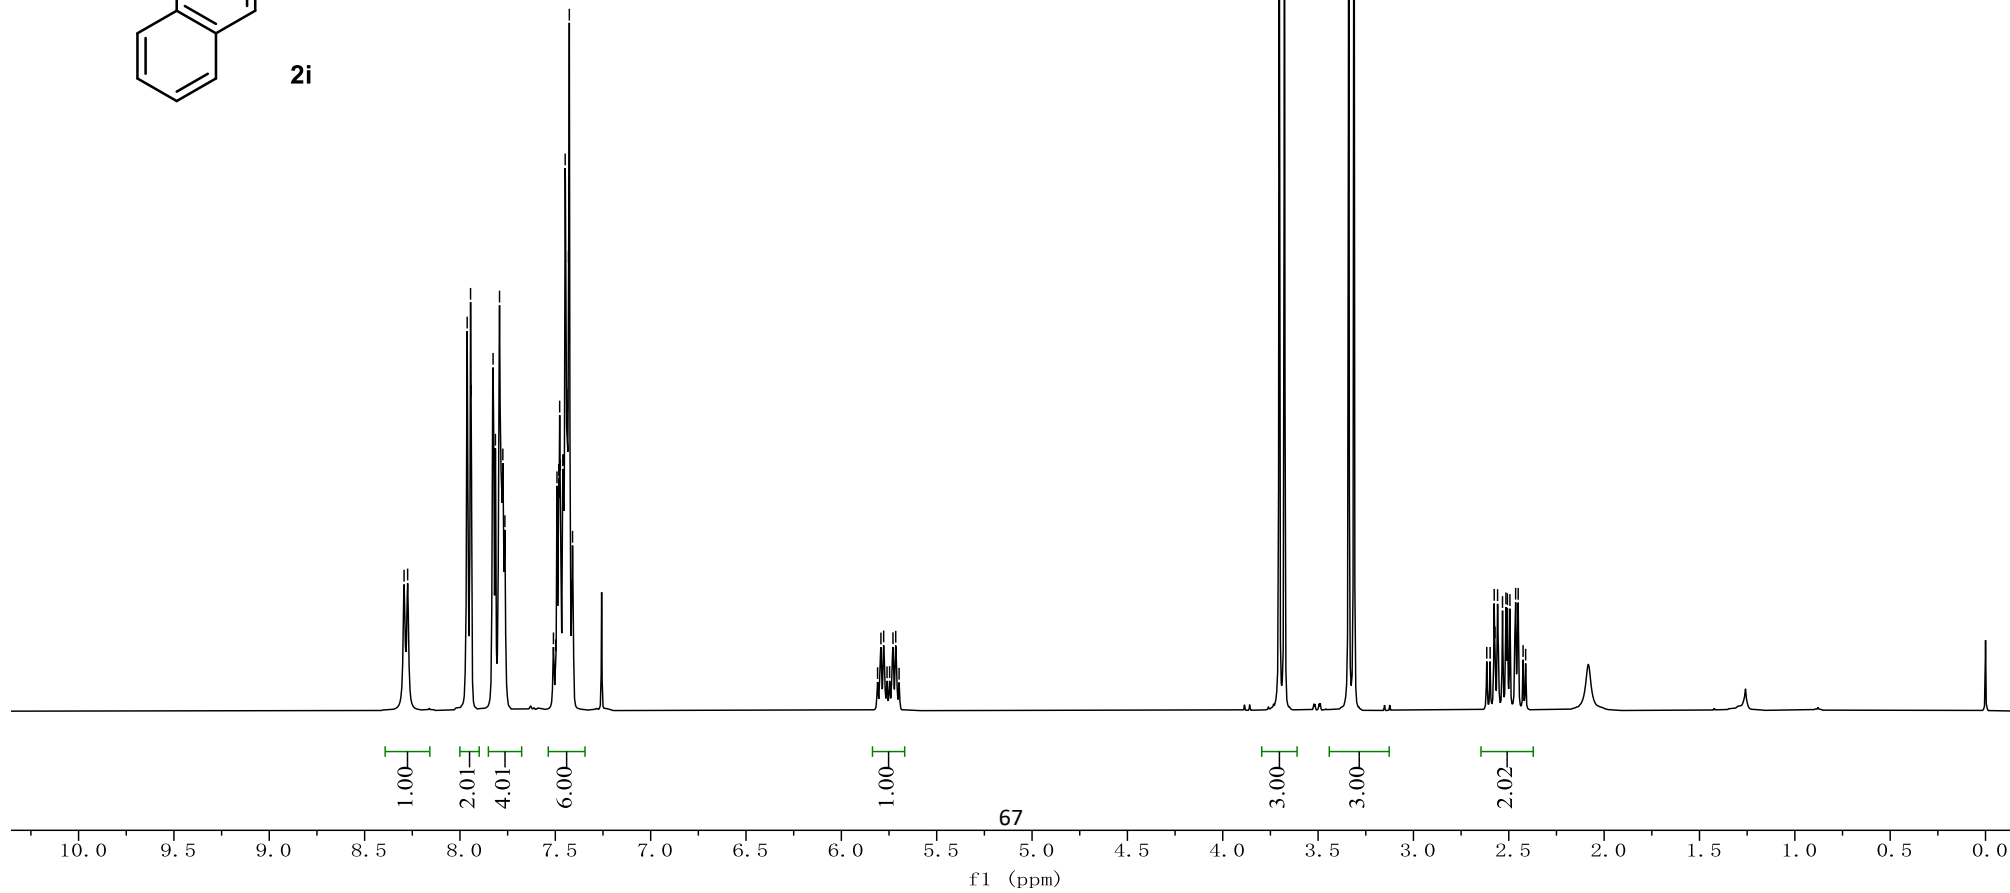

$^{13}\text{C}$  NMR (101 MHz,  $\text{CDCl}_3$ )

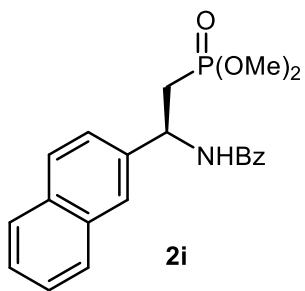

166.53

138.70  
138.61  
134.00  
133.31  
132.80  
131.67  
128.64  
128.55  
128.02  
127.62  
127.26  
126.30  
126.01  
124.71  
124.25

52.57  
52.50  
52.43  
52.36  
48.94  
48.89

32.15  
30.78

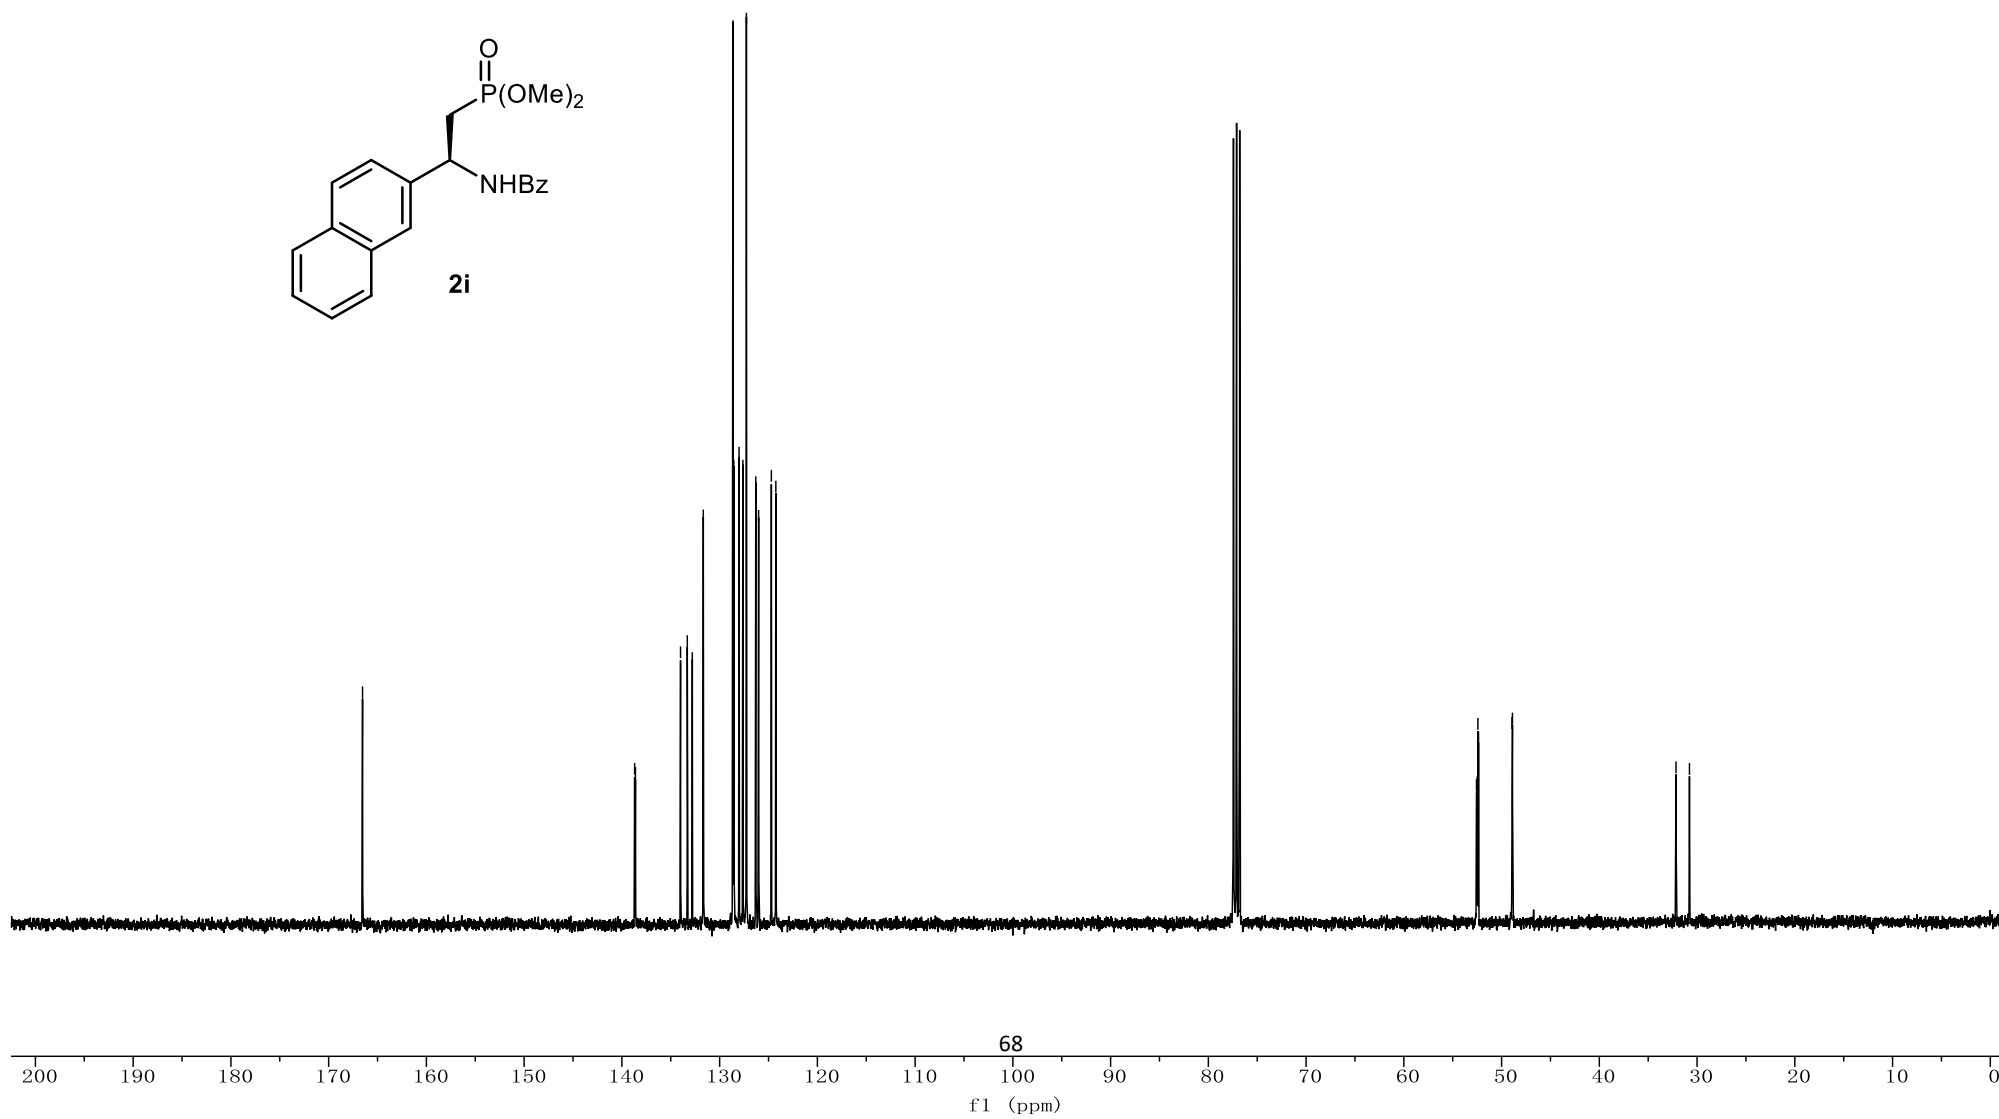

68

— 30.68

$^{31}\text{P}$  NMR (162 MHz,  $\text{CDCl}_3$ )

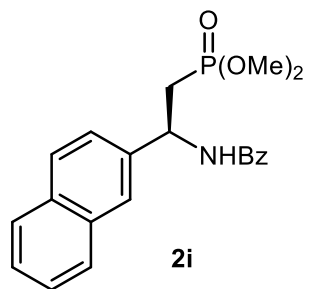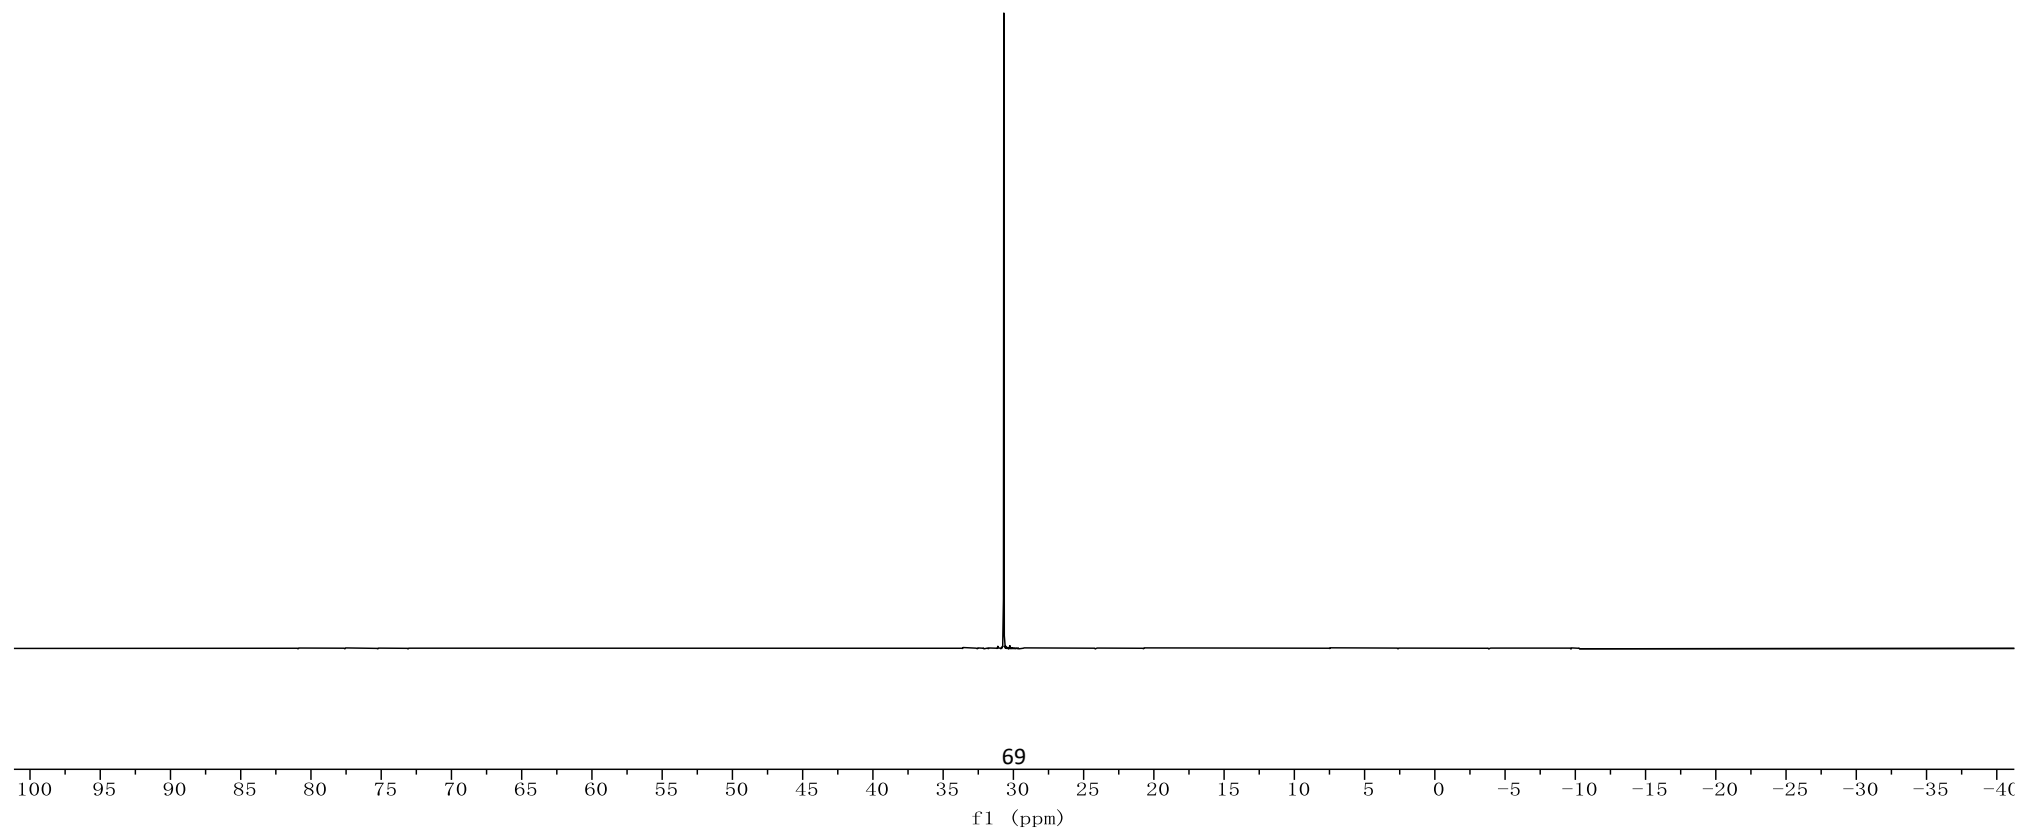

7.84  
7.83  
7.82  
7.80  
7.79  
7.50  
7.48  
7.48  
7.47  
7.46  
7.43  
7.41  
7.16  
7.14

5.64  
5.62  
5.61  
5.59  
5.58  
5.56  
5.54

3.71  
3.68

3.33  
3.30

2.54  
2.52  
2.50  
2.48  
2.46  
2.44  
2.43  
2.40  
2.38  
2.36  
2.34  
2.09

<sup>1</sup>H NMR (400 MHz, CDCl<sub>3</sub>)

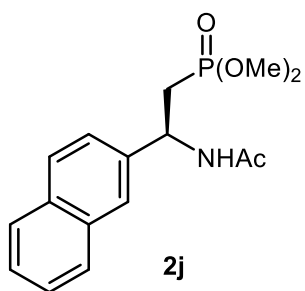

4.01

3.01

1.00

1.07

70

3.02

3.03

2.29

3.01

10.0 9.5 9.0 8.5 8.0 7.5 7.0 6.5 6.0 5.5 5.0 4.5 4.0 3.5 3.0 2.5 2.0 1.5 1.0 0.5

f1 (ppm)

$^{13}\text{C}$  NMR (101 MHz,  $\text{CDCl}_3$ )

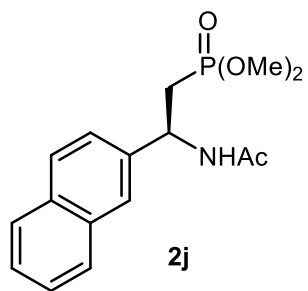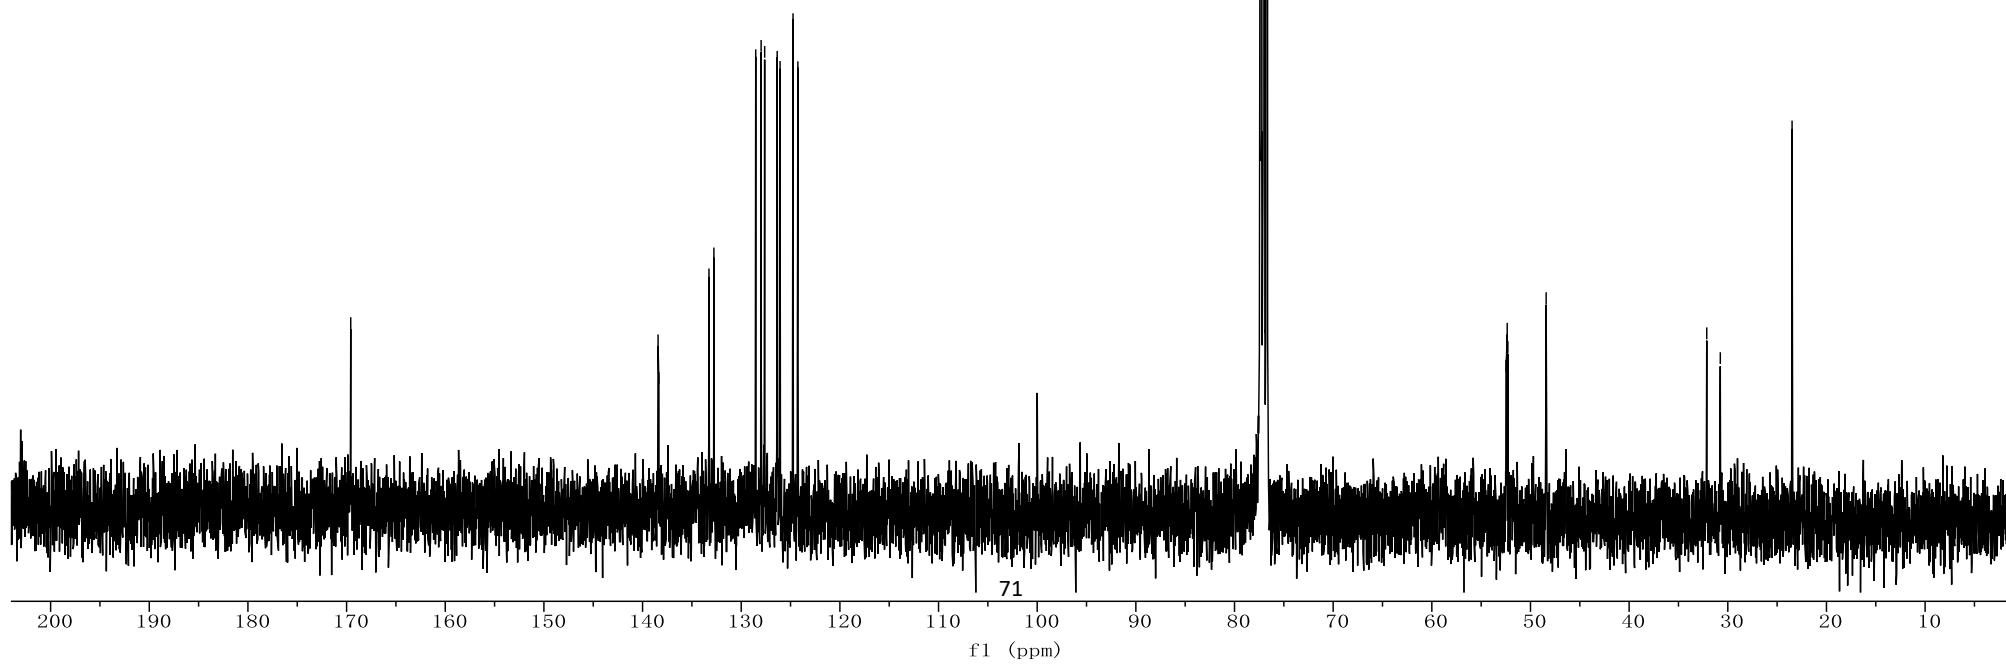



$^{31}\text{P}$  NMR (162 MHz,  $\text{CDCl}_3$ )

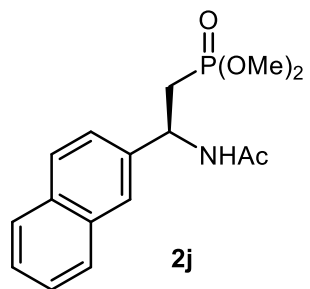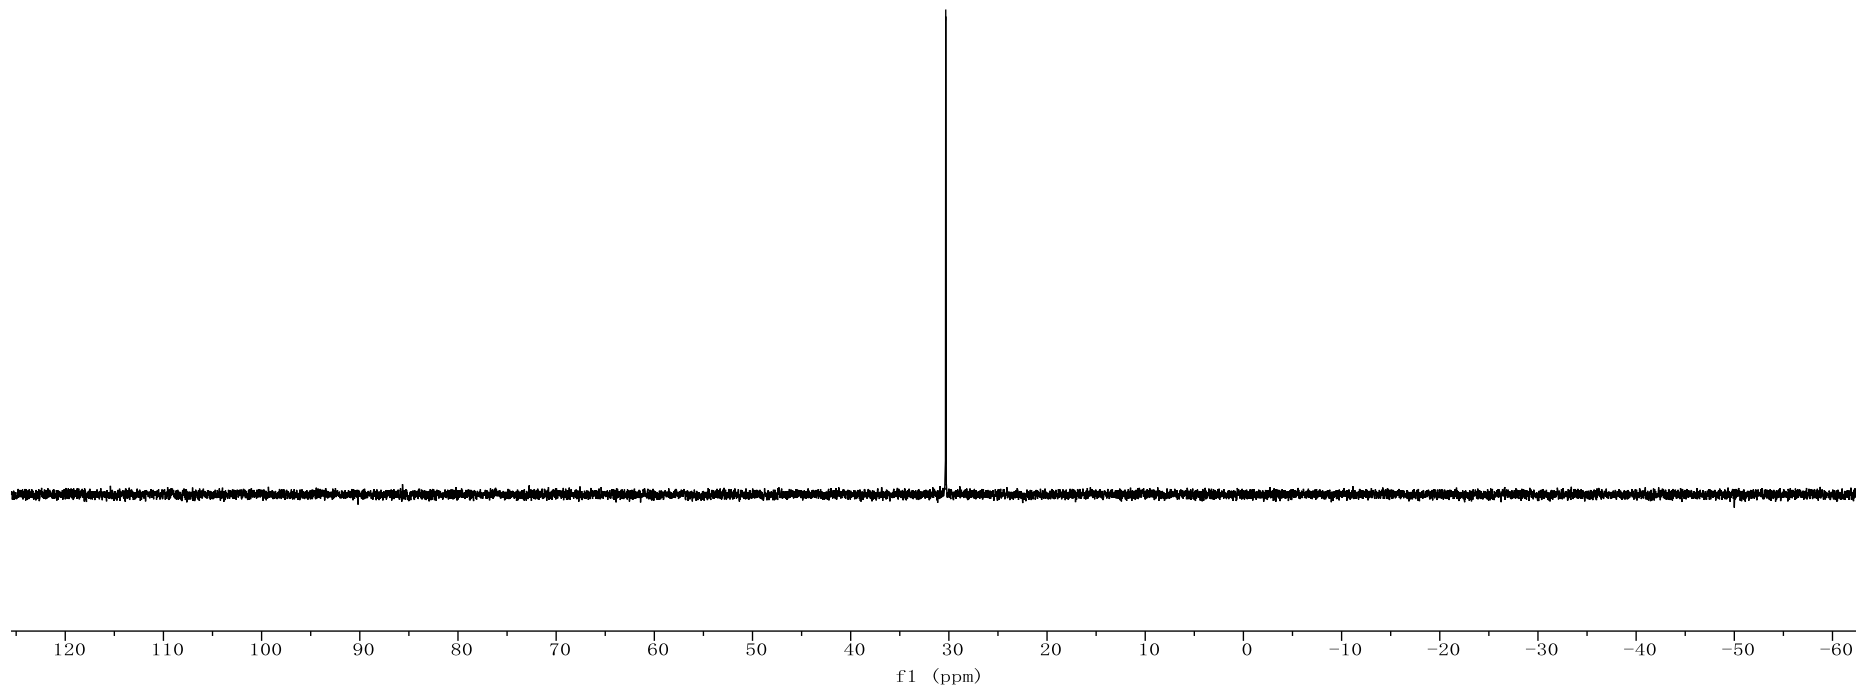

<sup>1</sup>H NMR (400 MHz, CDCl<sub>3</sub>)

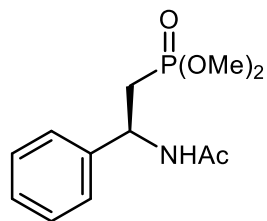

**2k**

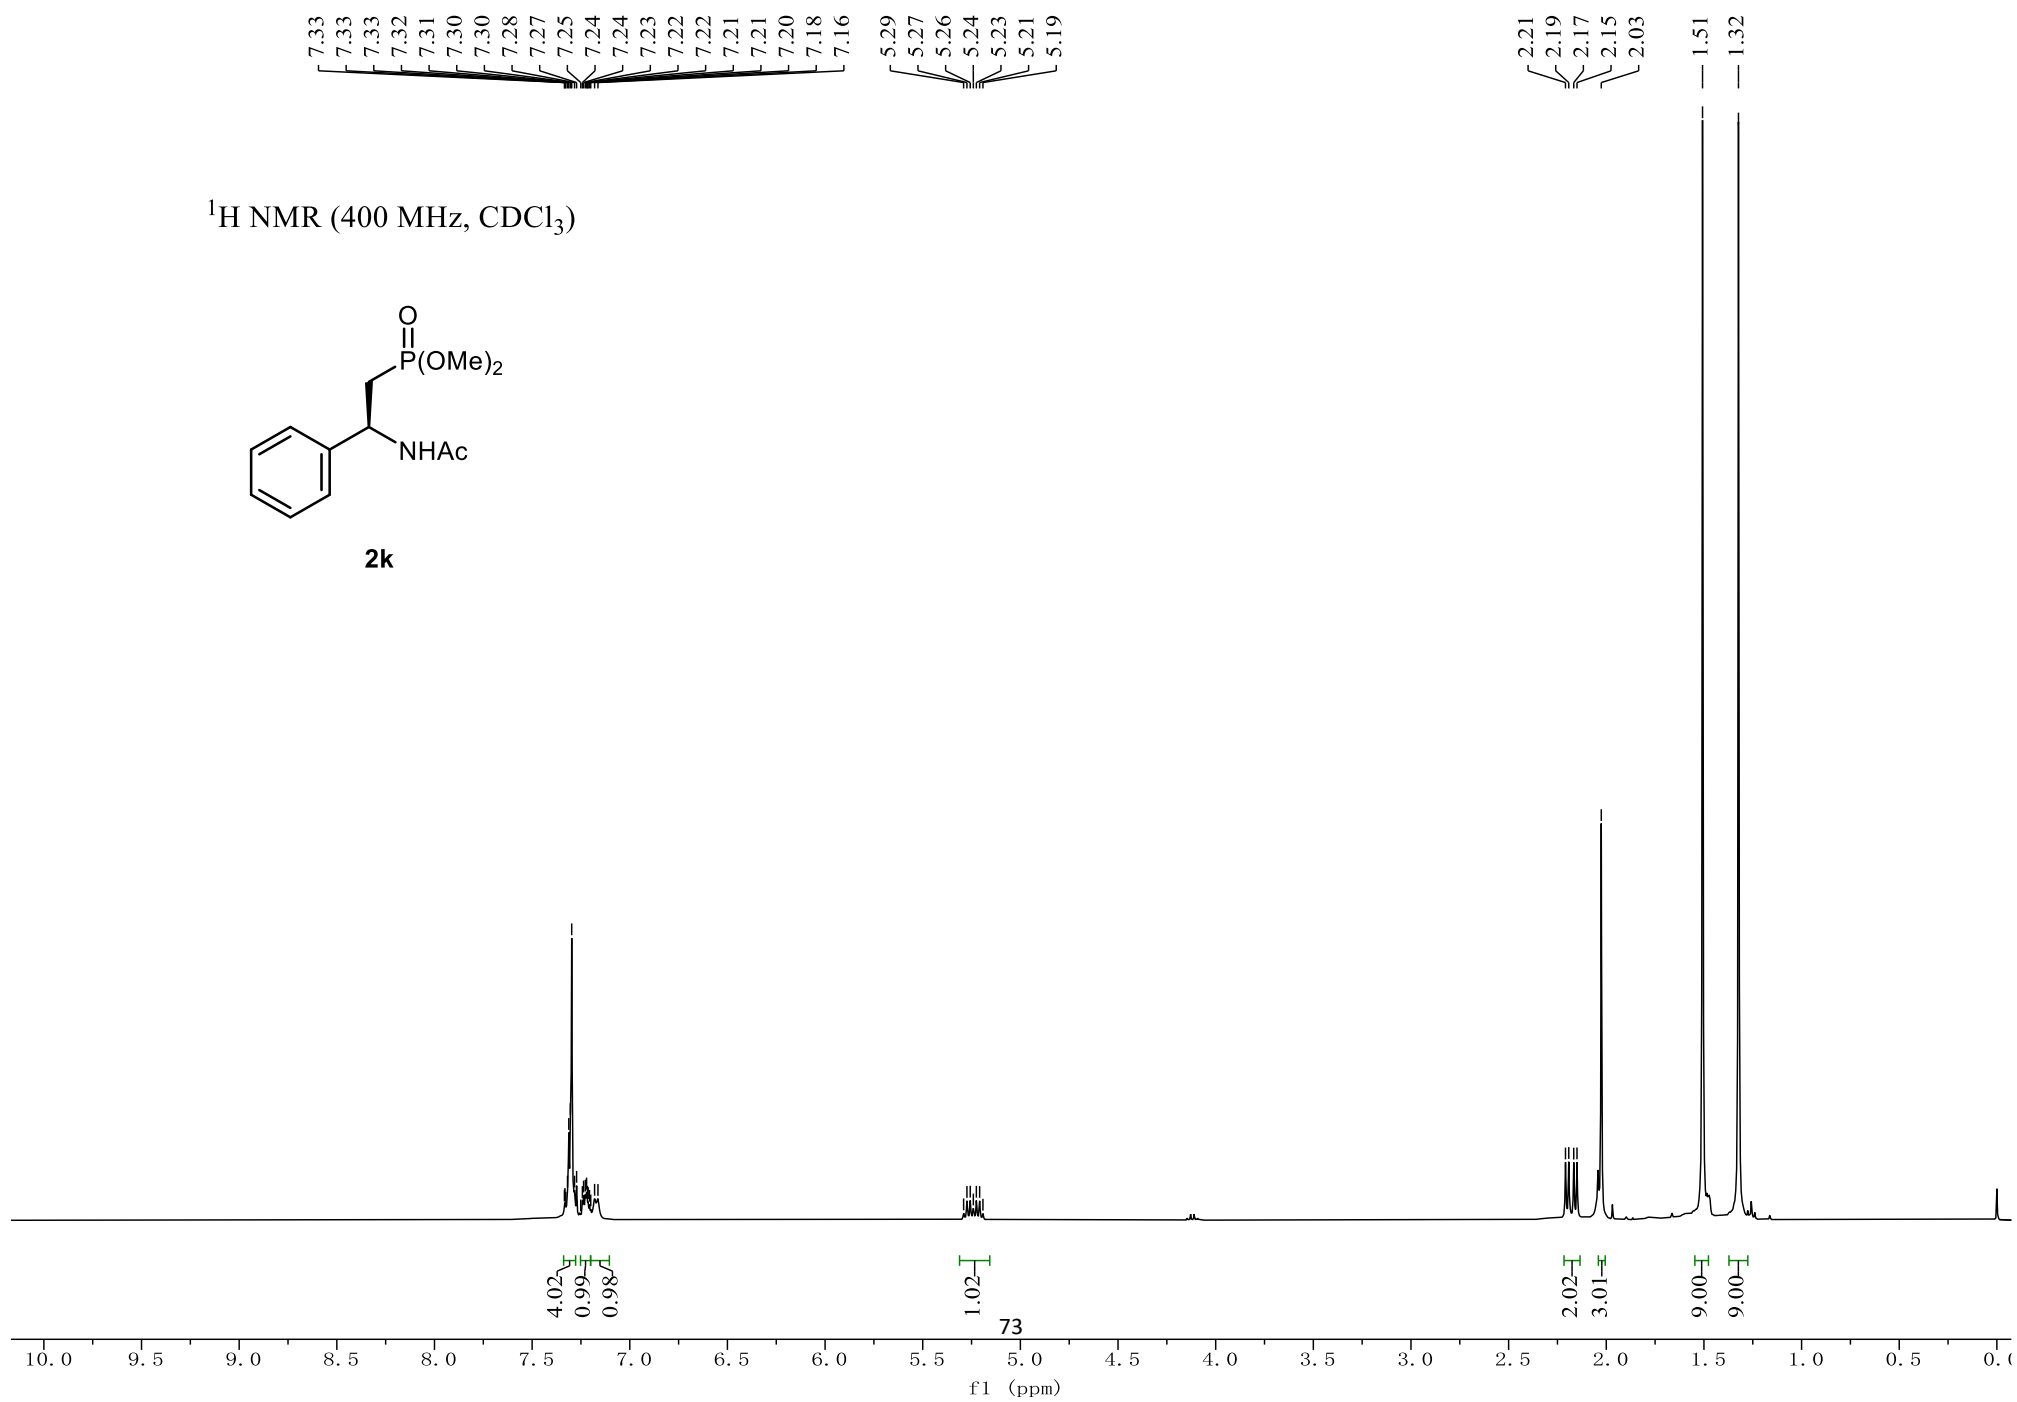

$^{13}\text{C}$  NMR (101 MHz,  $\text{CDCl}_3$ )

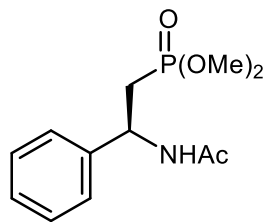

**2k**

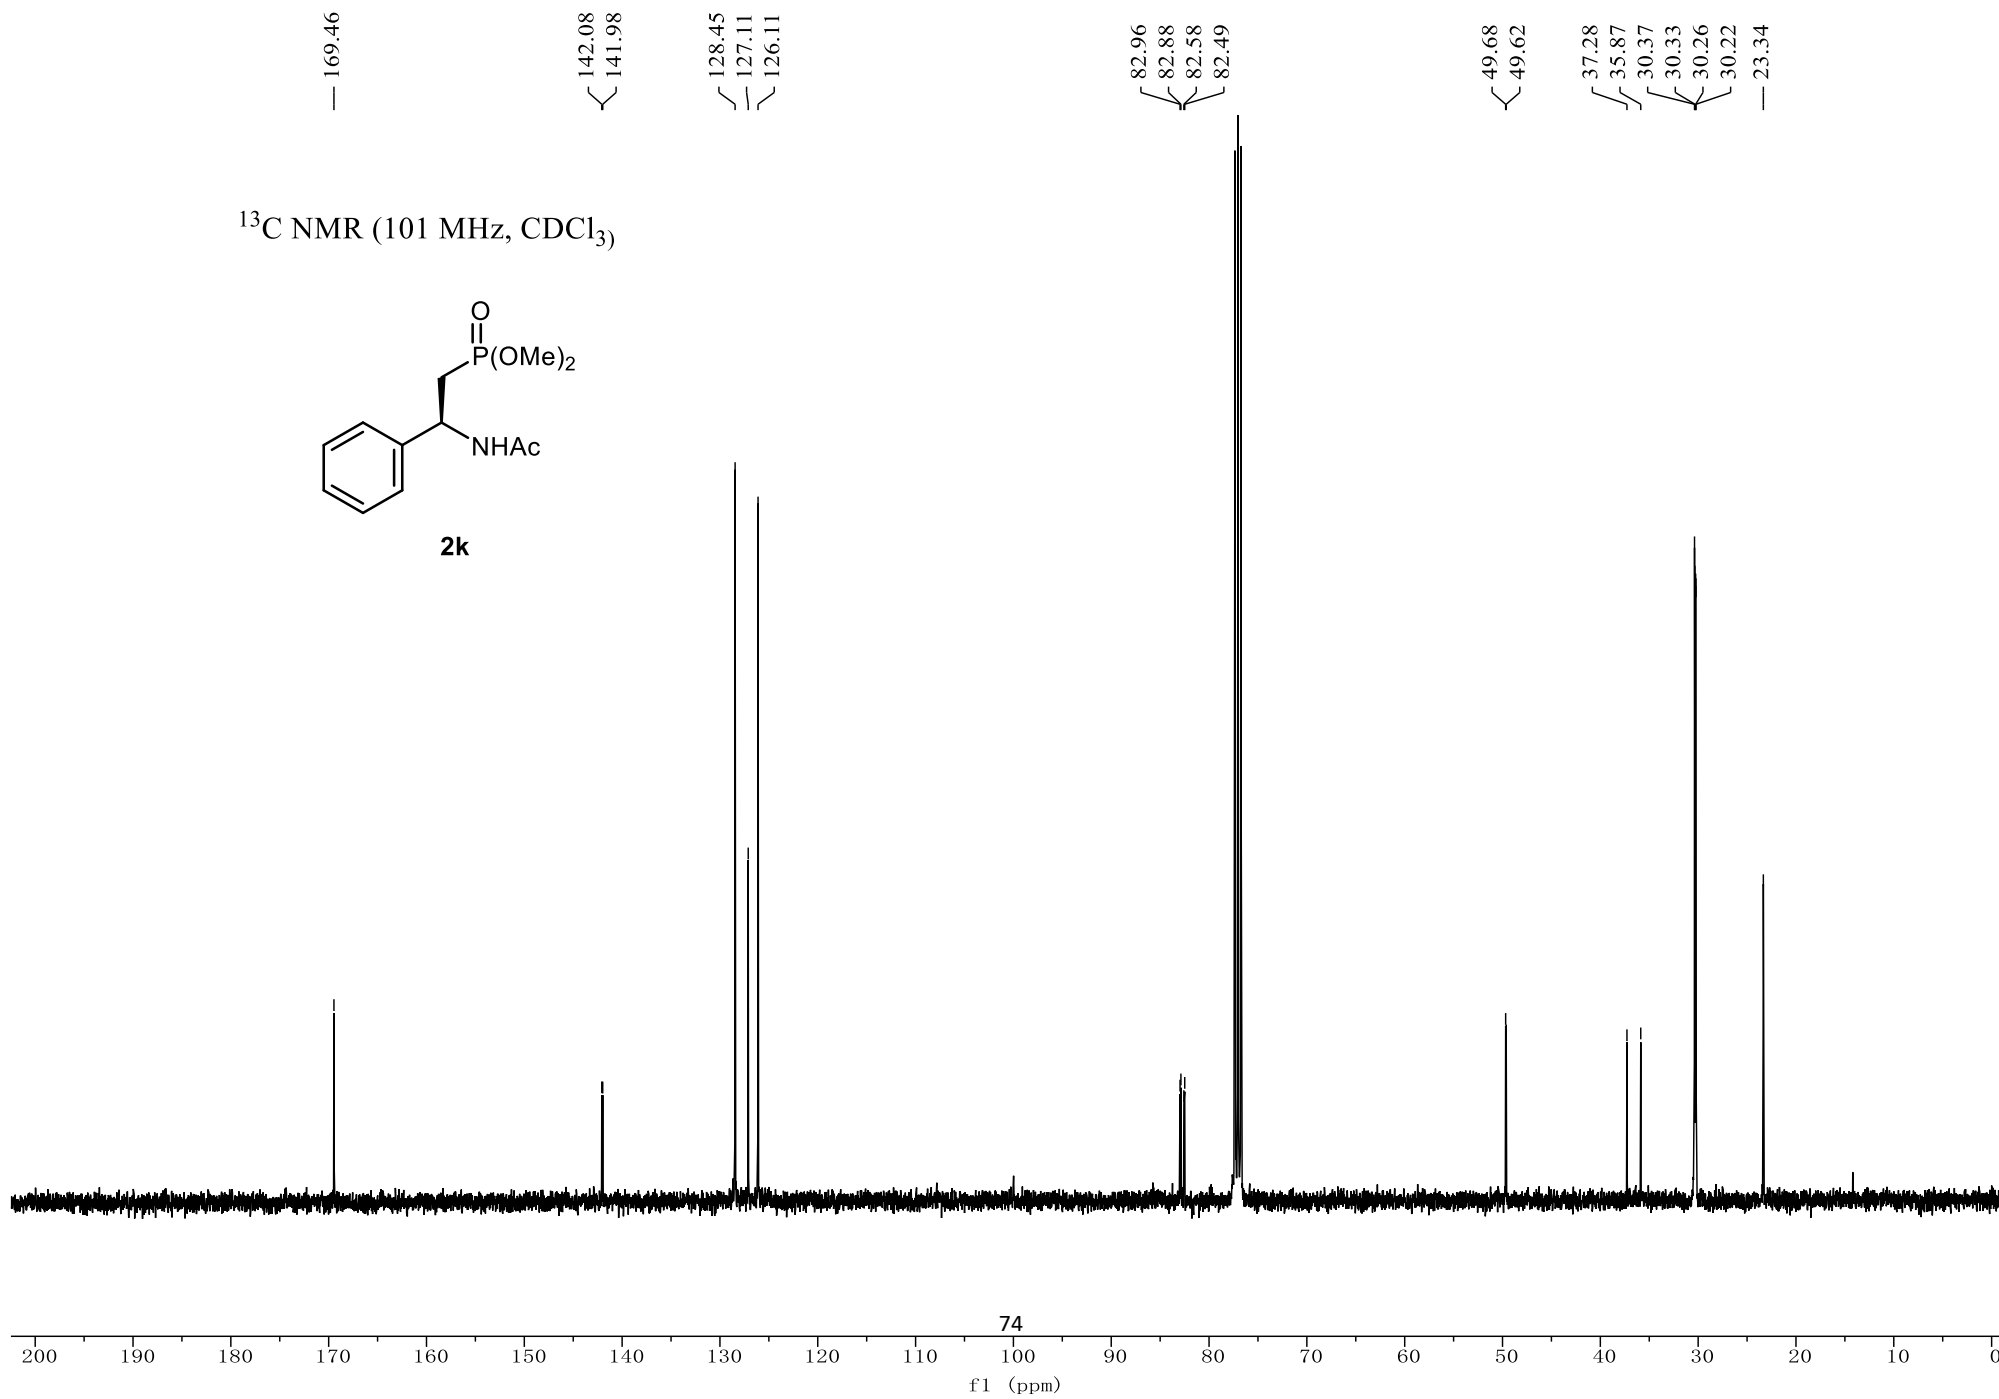

$^{31}\text{P}$  NMR (162 MHz,  $\text{CDCl}_3$ )

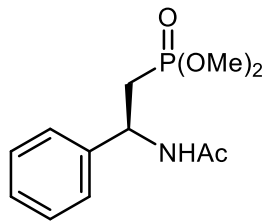

**2k**

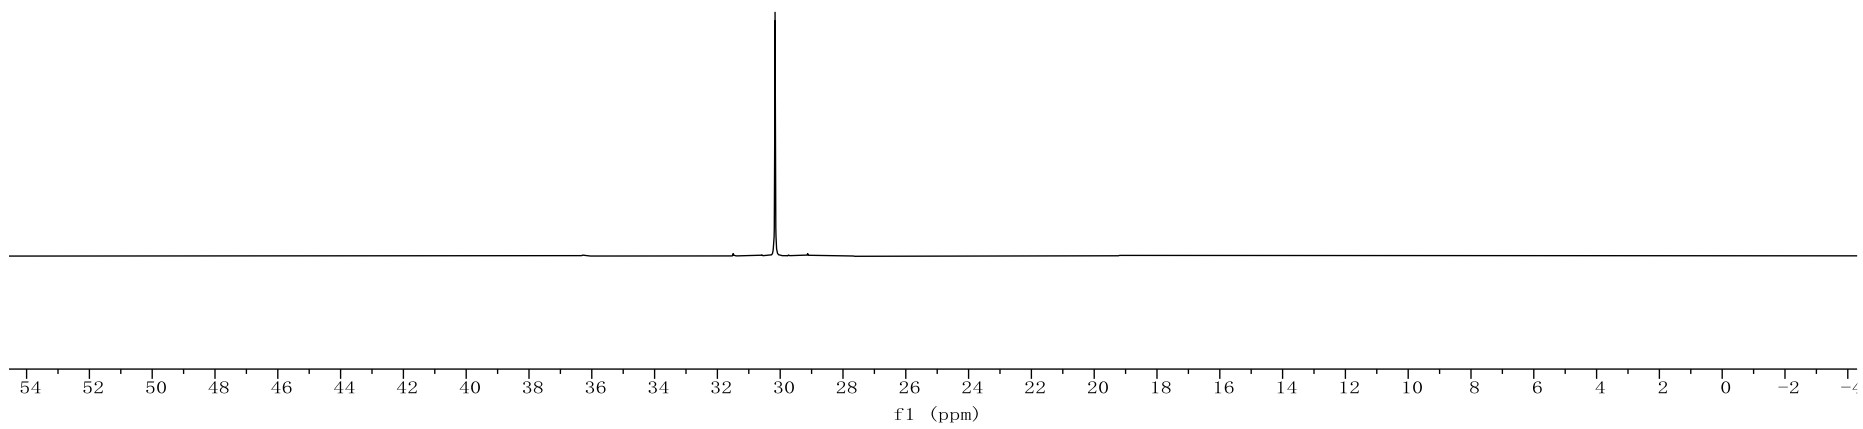

7.33  
7.33  
7.33  
7.32  
7.31  
7.30  
7.30  
7.28  
7.27  
7.25  
7.24  
7.24  
7.23  
7.22  
7.21  
7.21  
7.20  
7.18  
7.16

5.29  
5.27  
5.26  
5.24  
5.23  
5.21  
5.19

2.21  
2.19  
2.17  
2.15  
2.03

1.51  
1.32

$^1\text{H}$  NMR (400 MHz,  $\text{CDCl}_3$ )

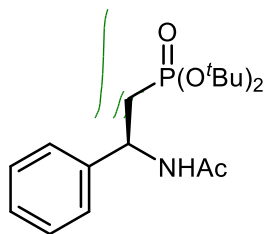

21

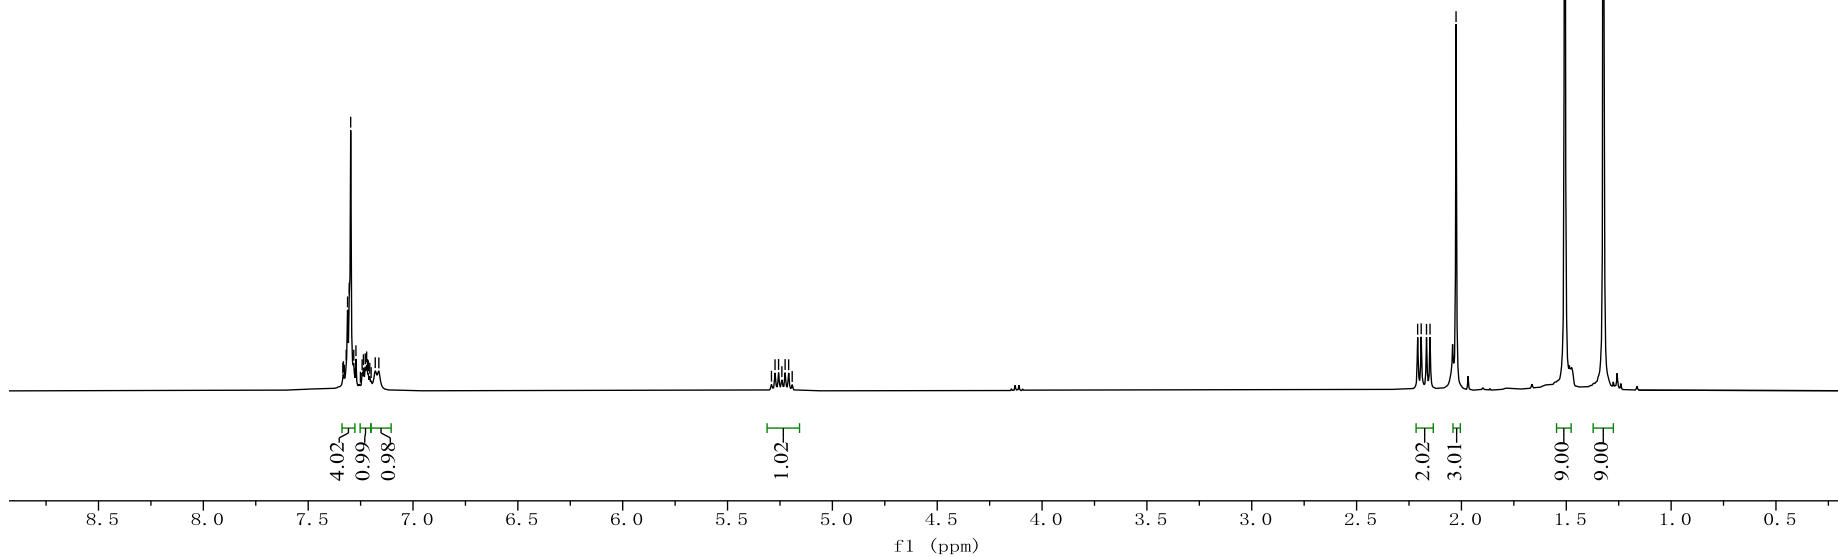

— 169.46

— 142.08  
— 141.98

— 128.45  
— 127.11  
— 126.11

— 82.96  
— 82.88  
— 82.58  
— 82.49

— 49.68  
— 49.62

— 37.28  
— 35.87  
— 30.37  
— 30.33  
— 30.26  
— 30.22  
— 23.34

$^{13}\text{C}$  NMR (101 MHz,  $\text{CDCl}_3$ )

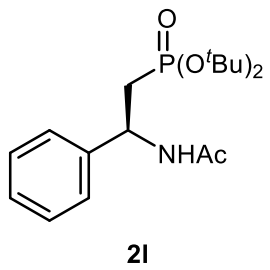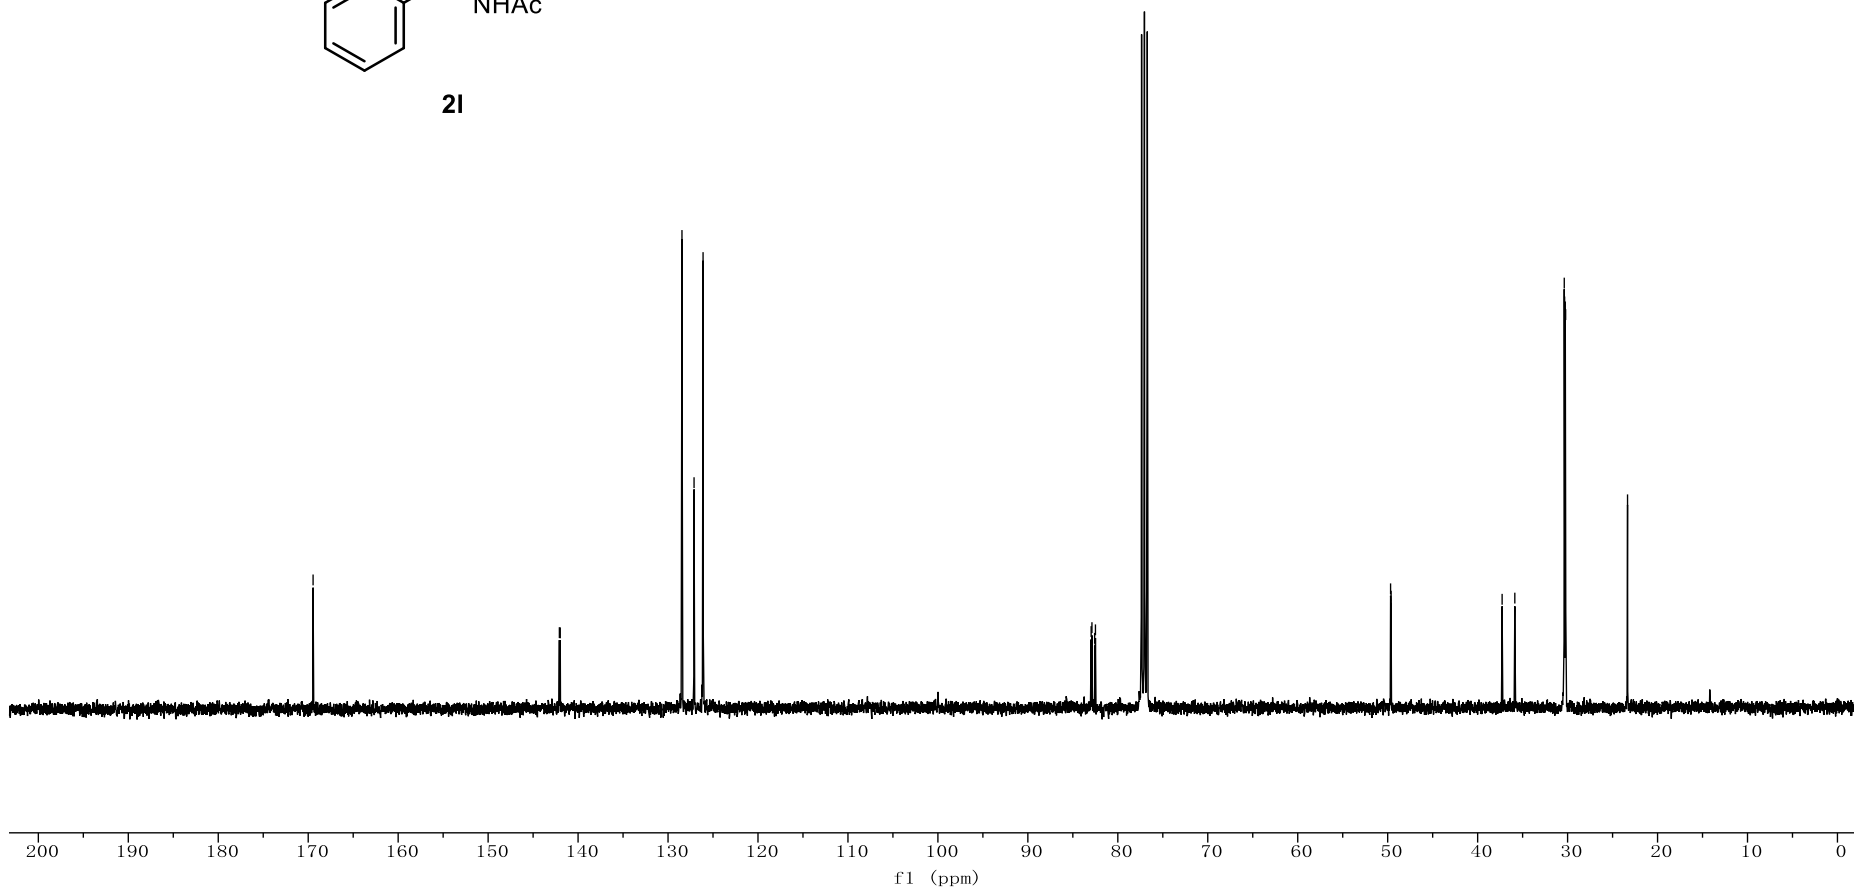

$^{31}\text{P}$  NMR (162 MHz,  $\text{CDCl}_3$ )

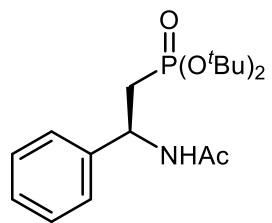

**21**

— 19.06

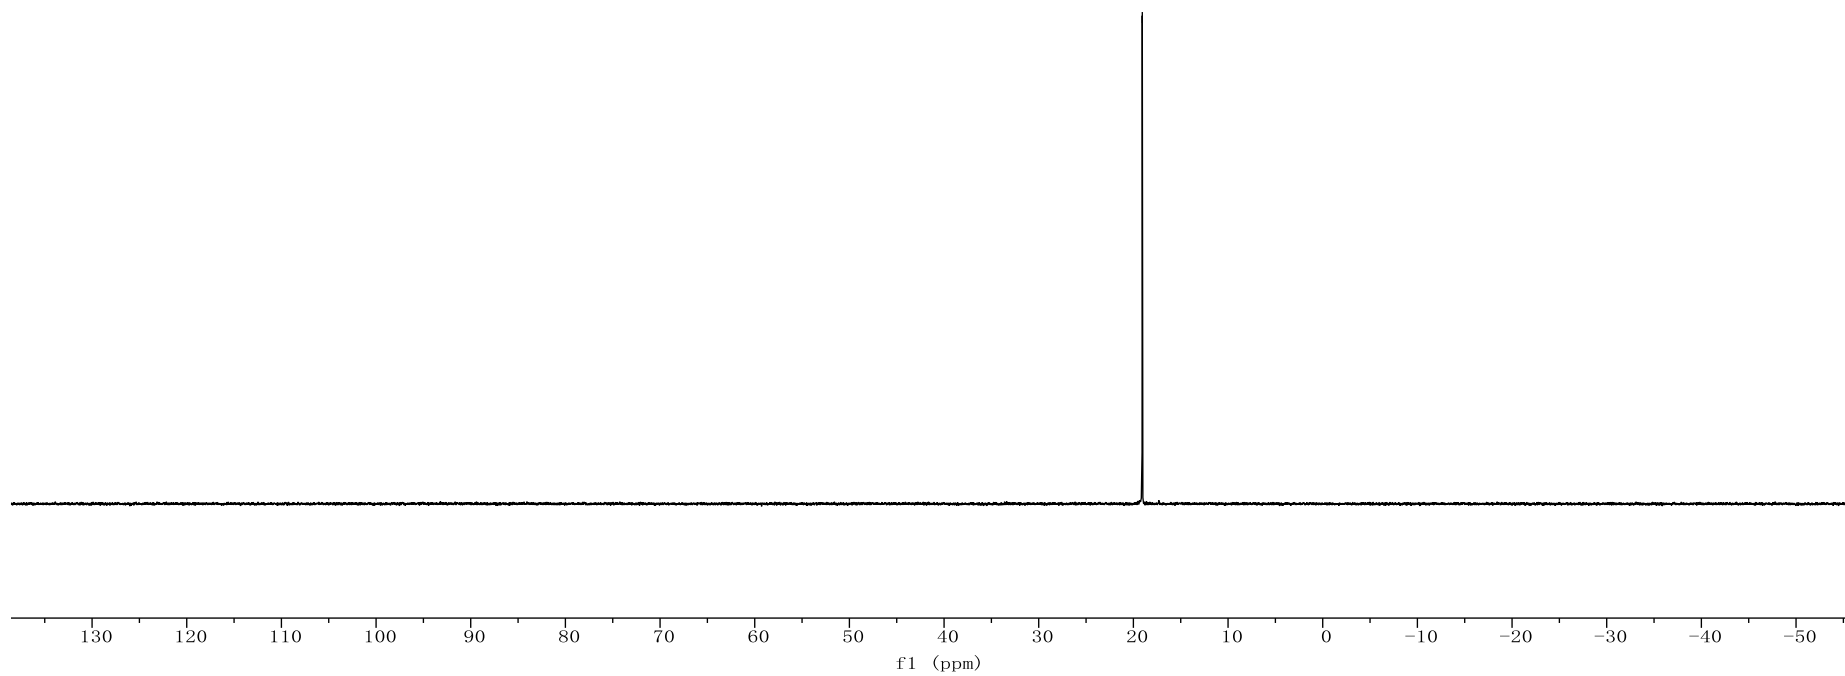

78

<sup>1</sup>H NMR (400 MHz, CDCl<sub>3</sub>)

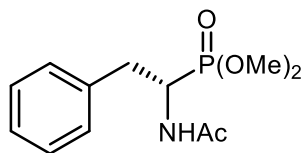

**4a**

7.30  
7.29  
7.28  
7.27  
7.27  
7.24  
7.22  
7.21  
7.20  
6.66  
6.63

4.85  
4.84  
4.82  
4.81  
4.80  
4.78  
4.77  
4.76  
4.74

3.76  
3.73  
3.23  
3.22  
3.21  
3.20  
3.19  
3.18  
3.17  
2.98  
2.95  
2.94  
2.93  
2.92  
2.89  
1.89  
1.89

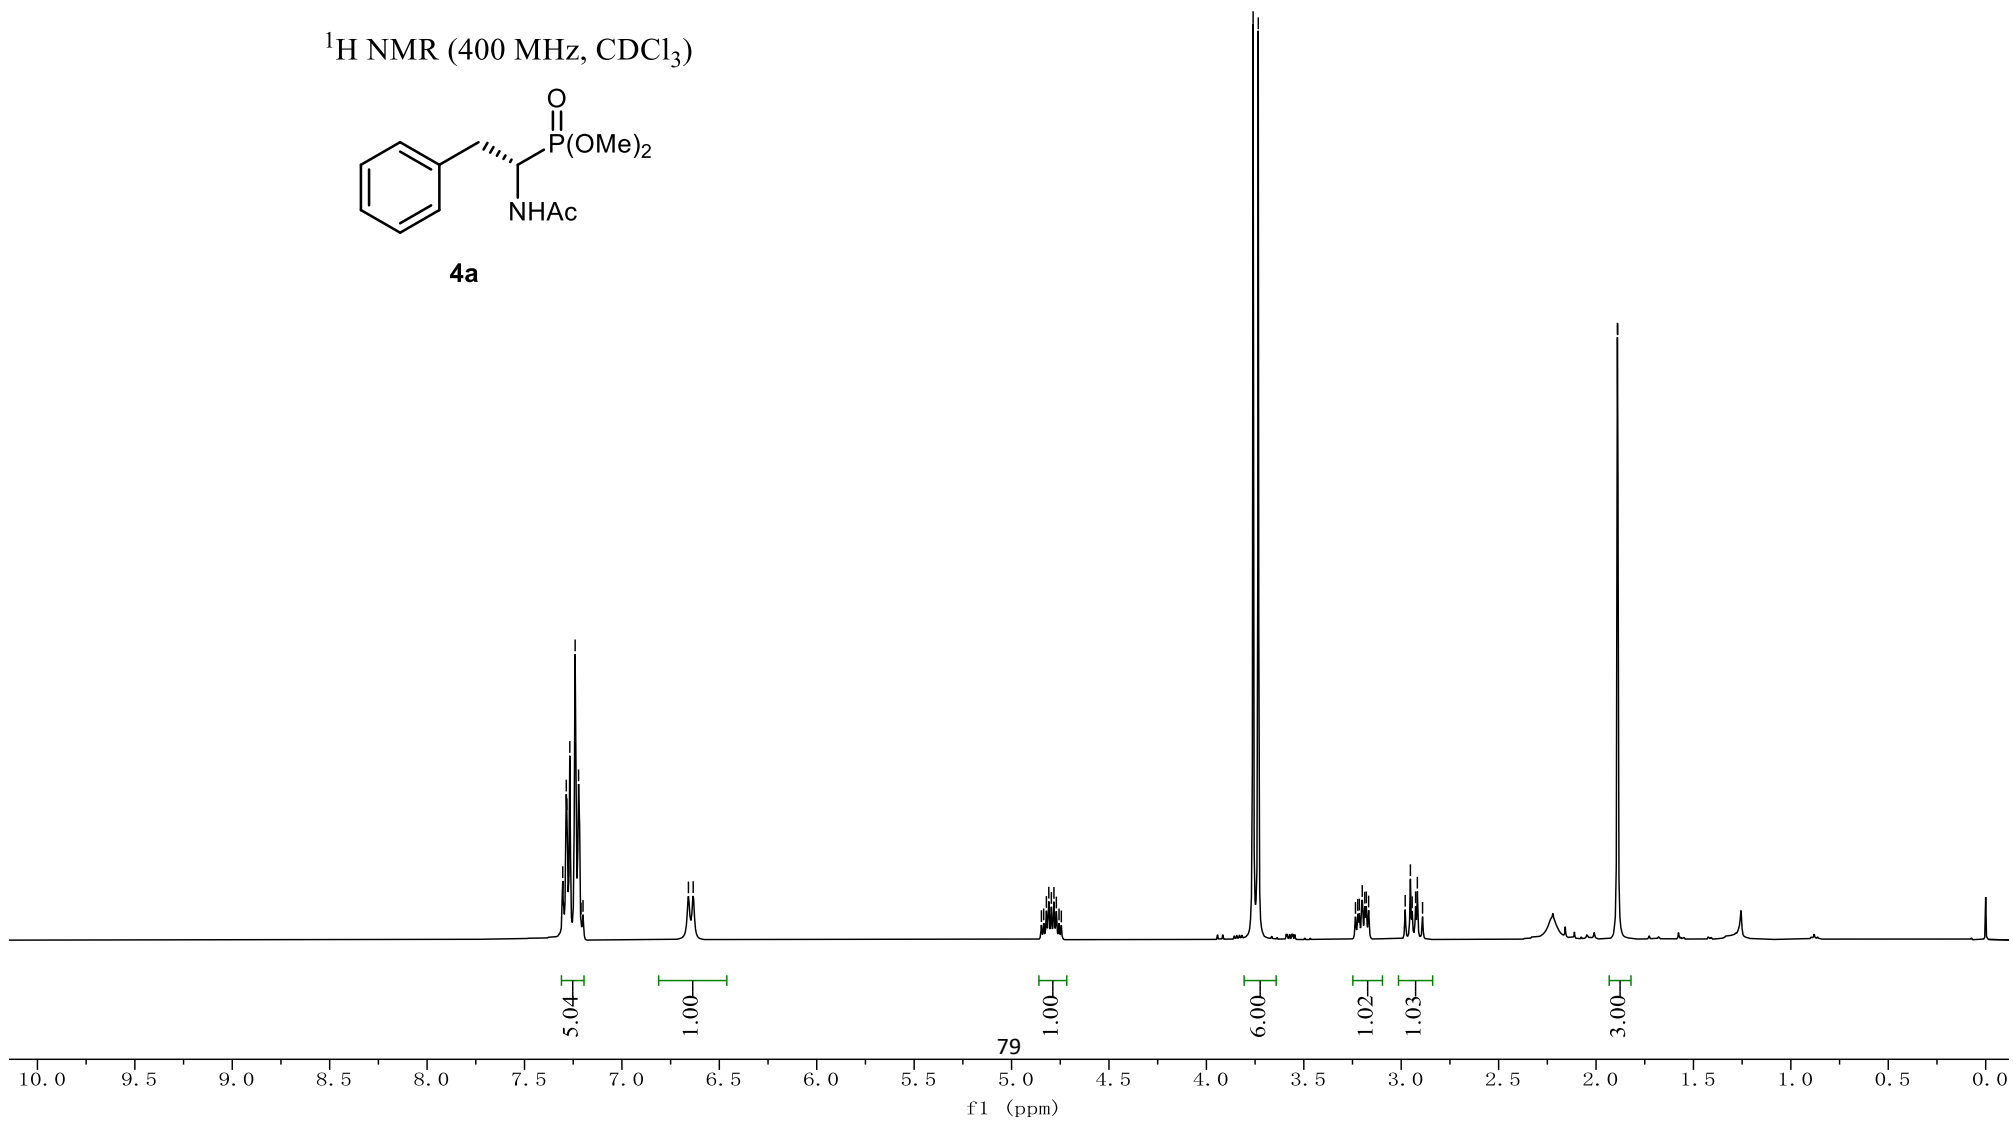



169.82  
169.77

136.54  
136.41  
129.08  
128.44  
126.86

53.54  
53.48  
52.91  
52.84  
46.43  
44.88

35.50  
35.47

22.77

$^{13}\text{C}$  NMR (101 MHz,  $\text{CDCl}_3$ )

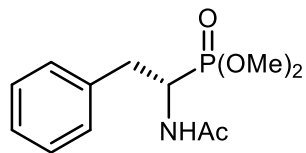

**4a**

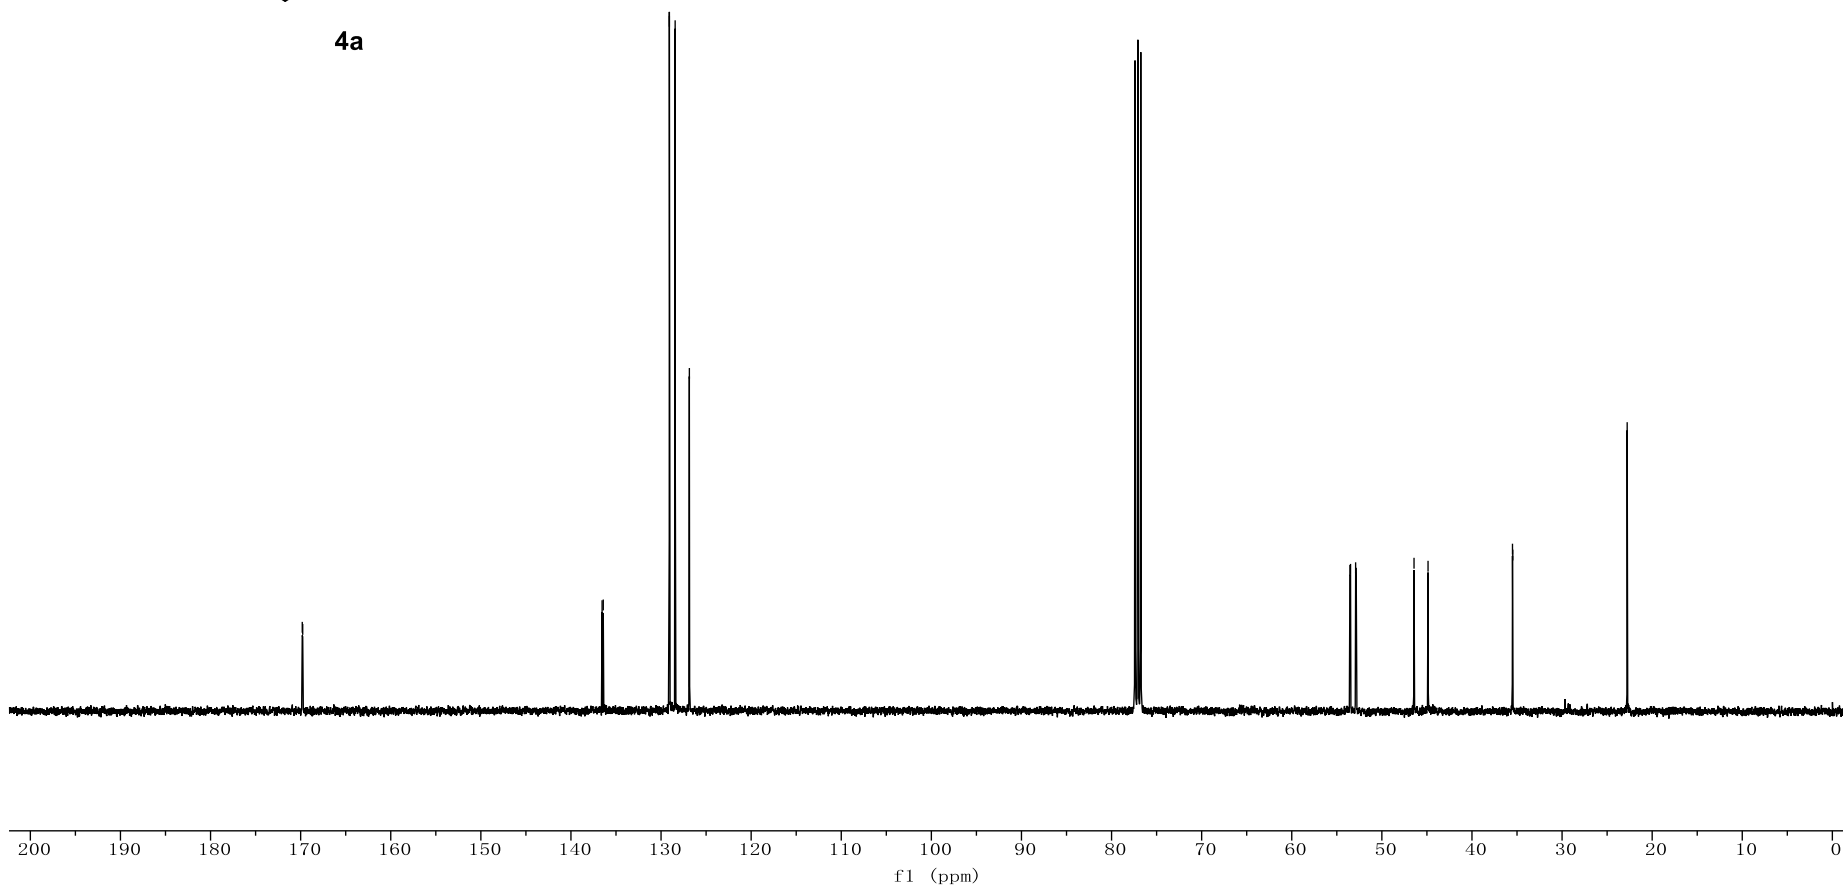

$^{31}\text{P}$  NMR (162 MHz,  $\text{CDCl}_3$ )

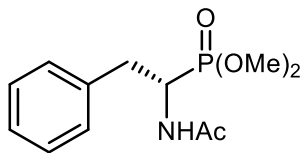

4a

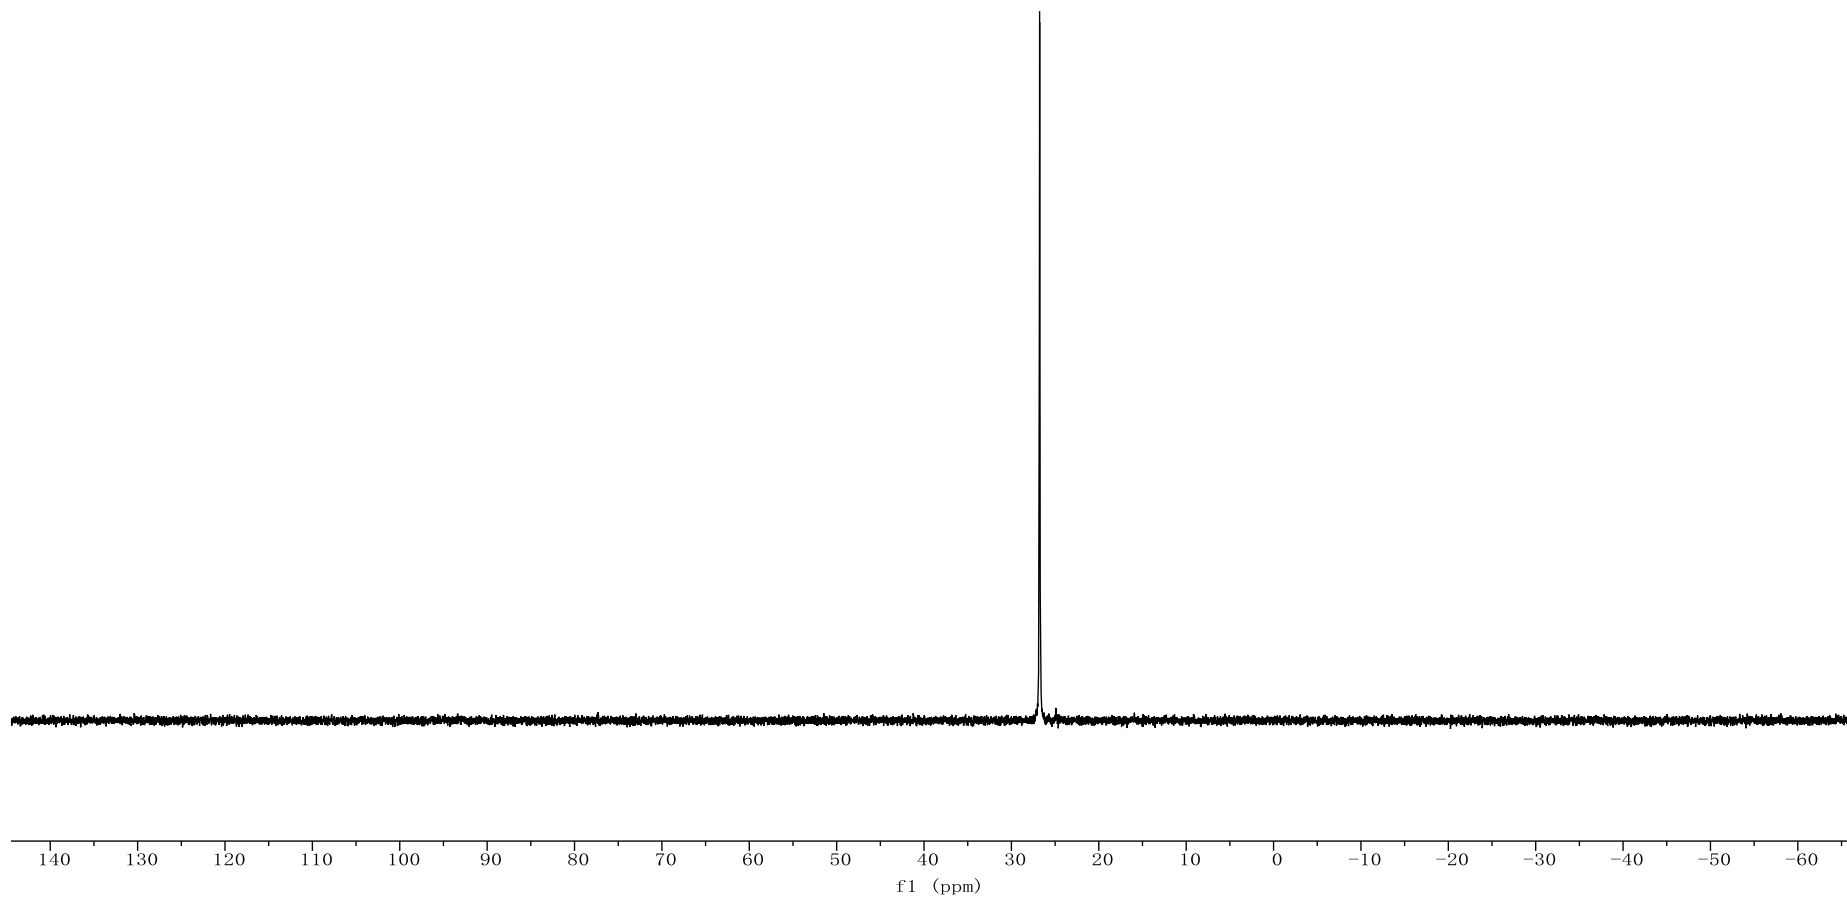

— 26.77

<sup>1</sup>H NMR (400 MHz, CDCl<sub>3</sub>)

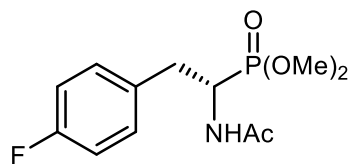

**4b**

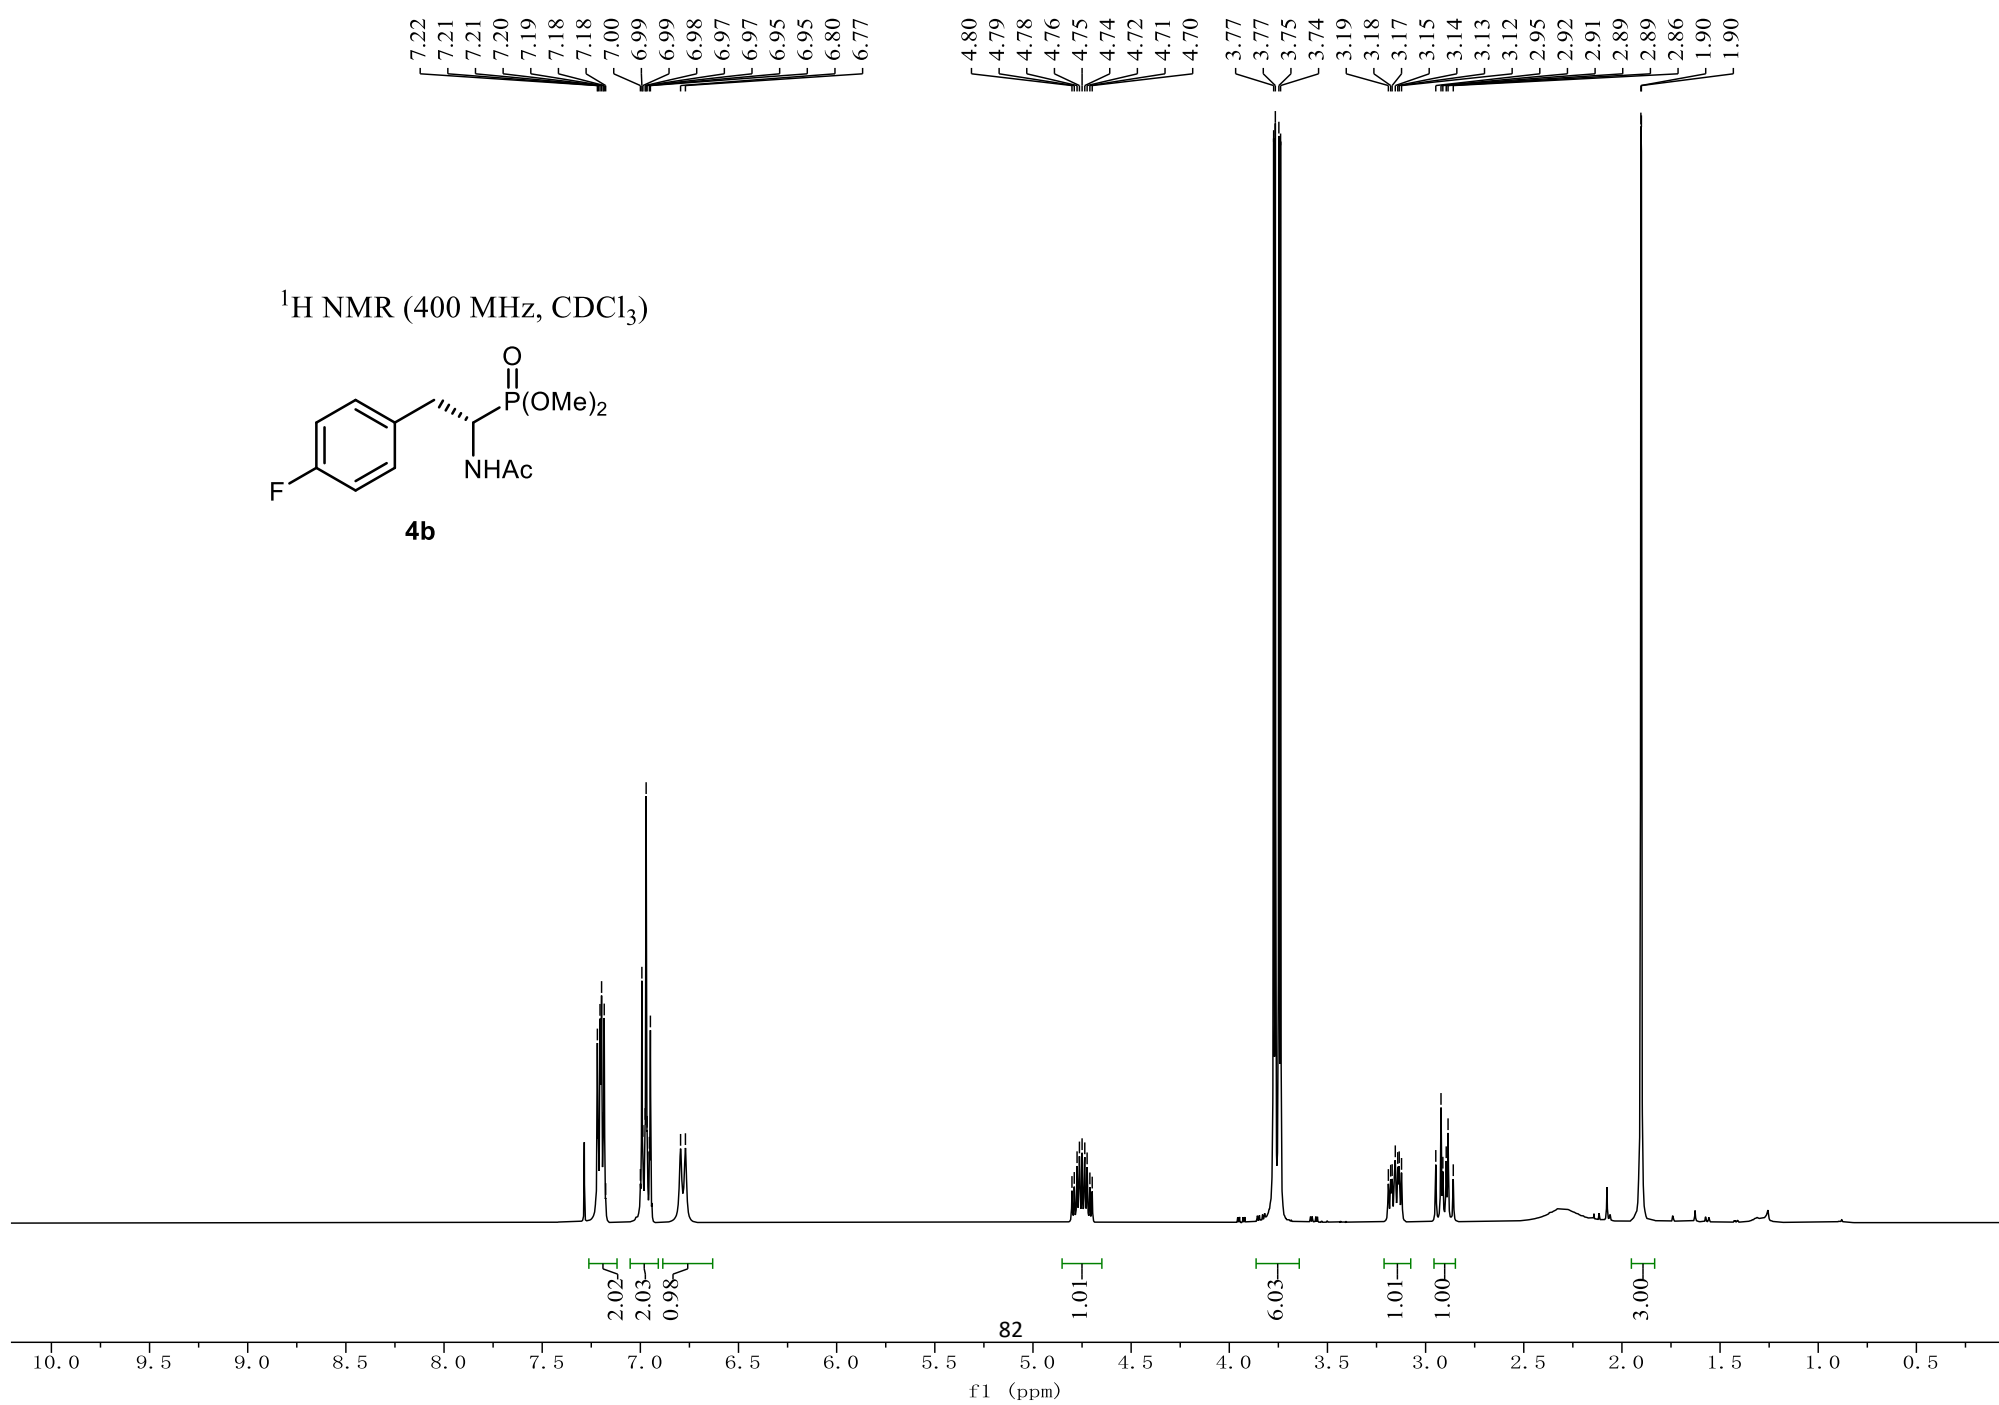

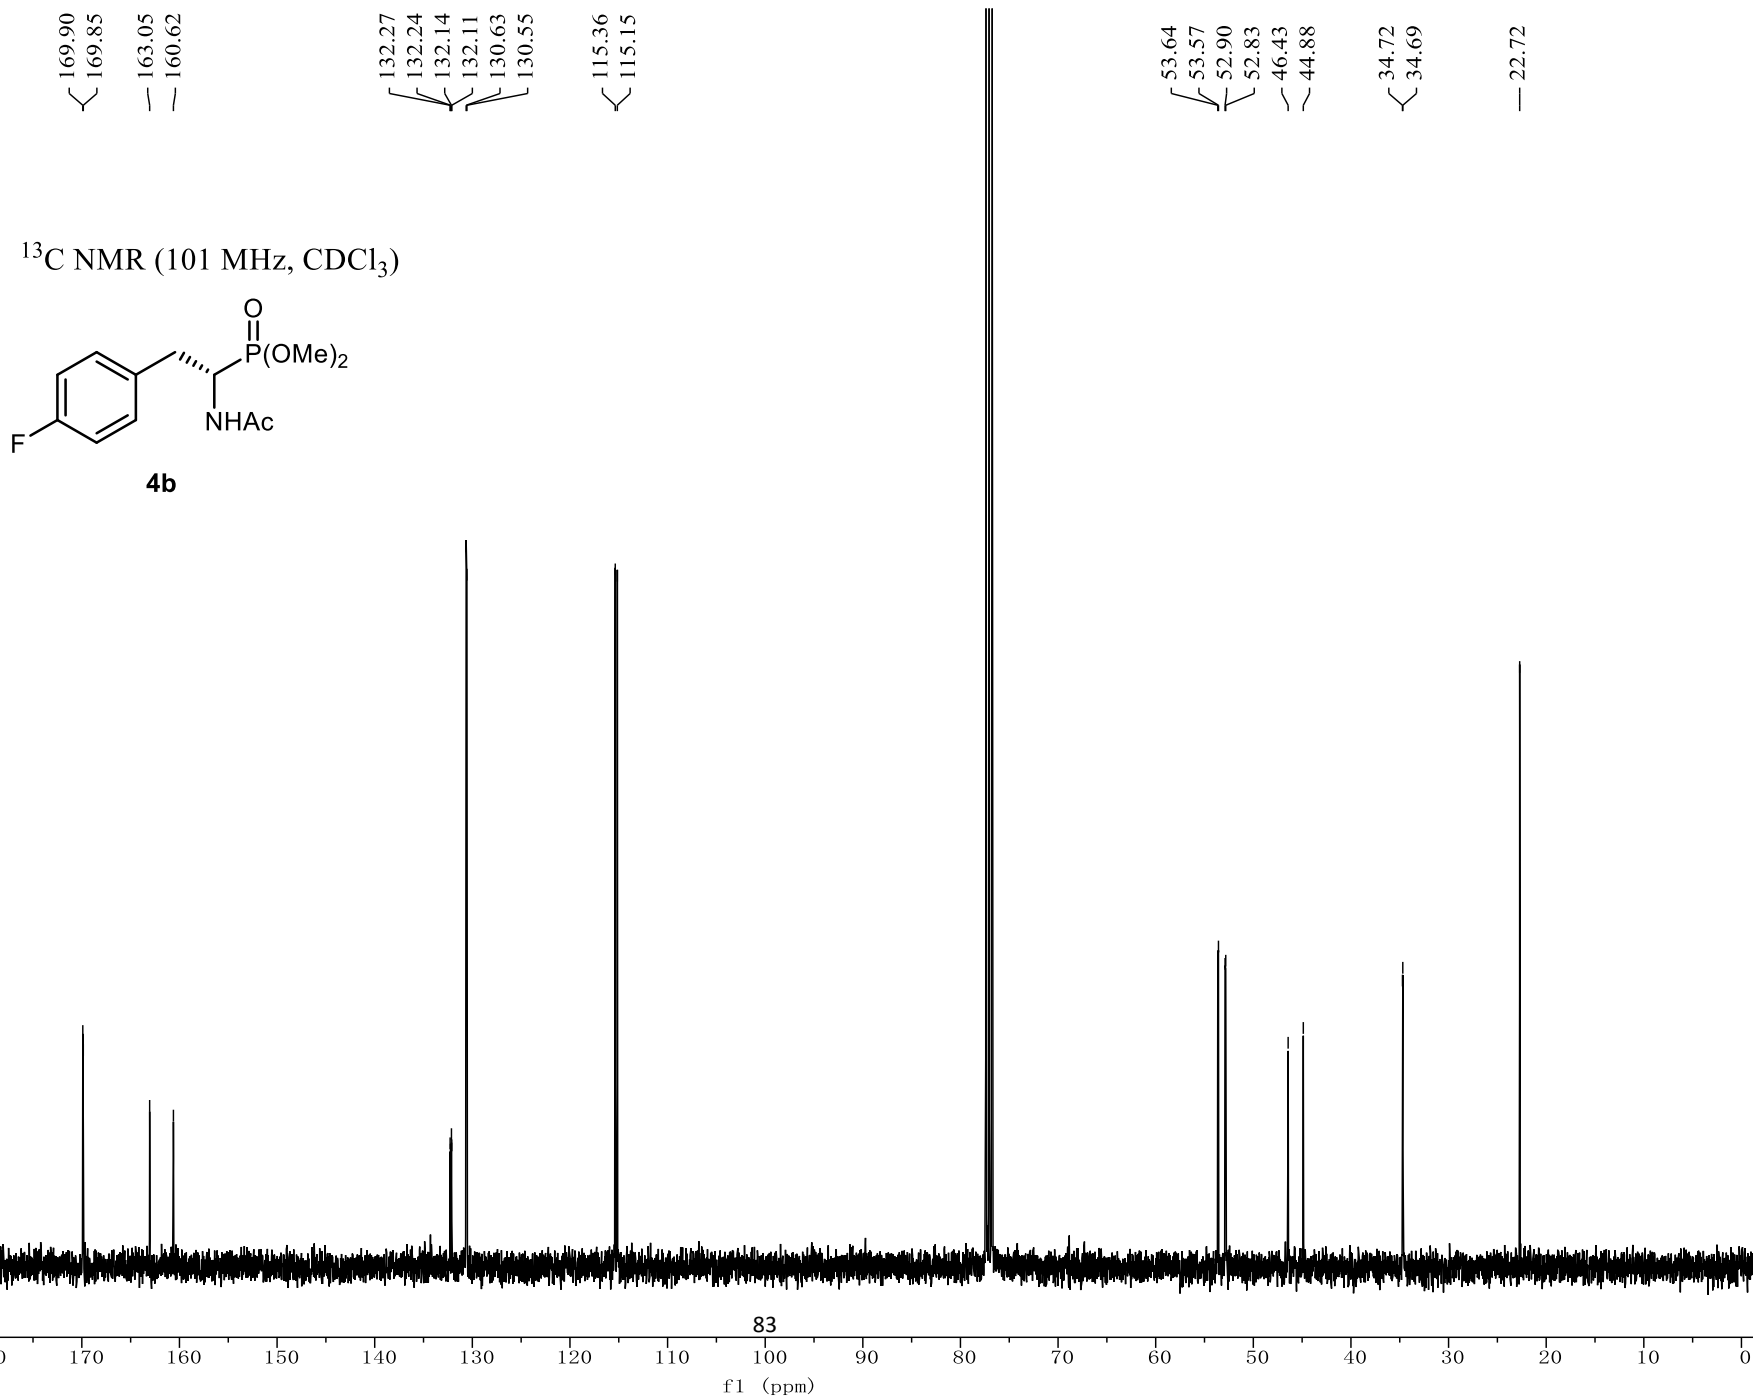

$^{31}\text{P}$  NMR (162 MHz,  $\text{CDCl}_3$ )

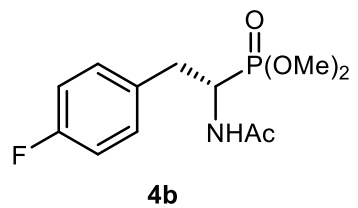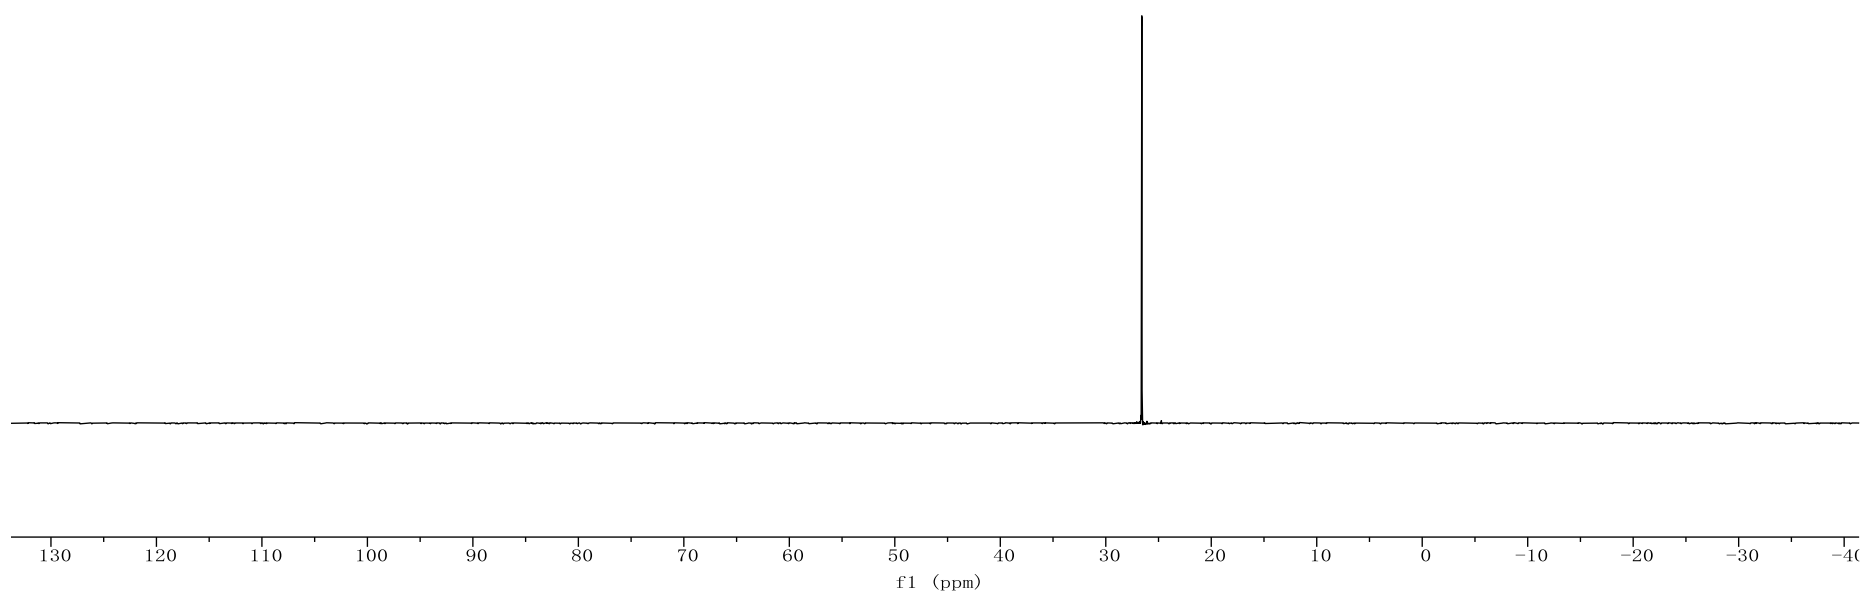

<sup>1</sup>H NMR (400 MHz, CDCl<sub>3</sub>)

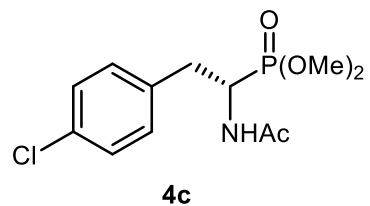

7.27  
7.27  
7.25  
7.18  
7.15

6.40  
6.38

4.82  
4.81  
4.79  
4.78  
4.77  
4.75  
4.74  
4.73  
4.71

3.78  
3.76  
3.75  
3.74

3.20  
3.19  
3.18  
3.16  
3.15  
3.14  
3.13  
2.94  
2.91  
2.90  
2.88  
2.87  
2.85  
1.91  
1.90

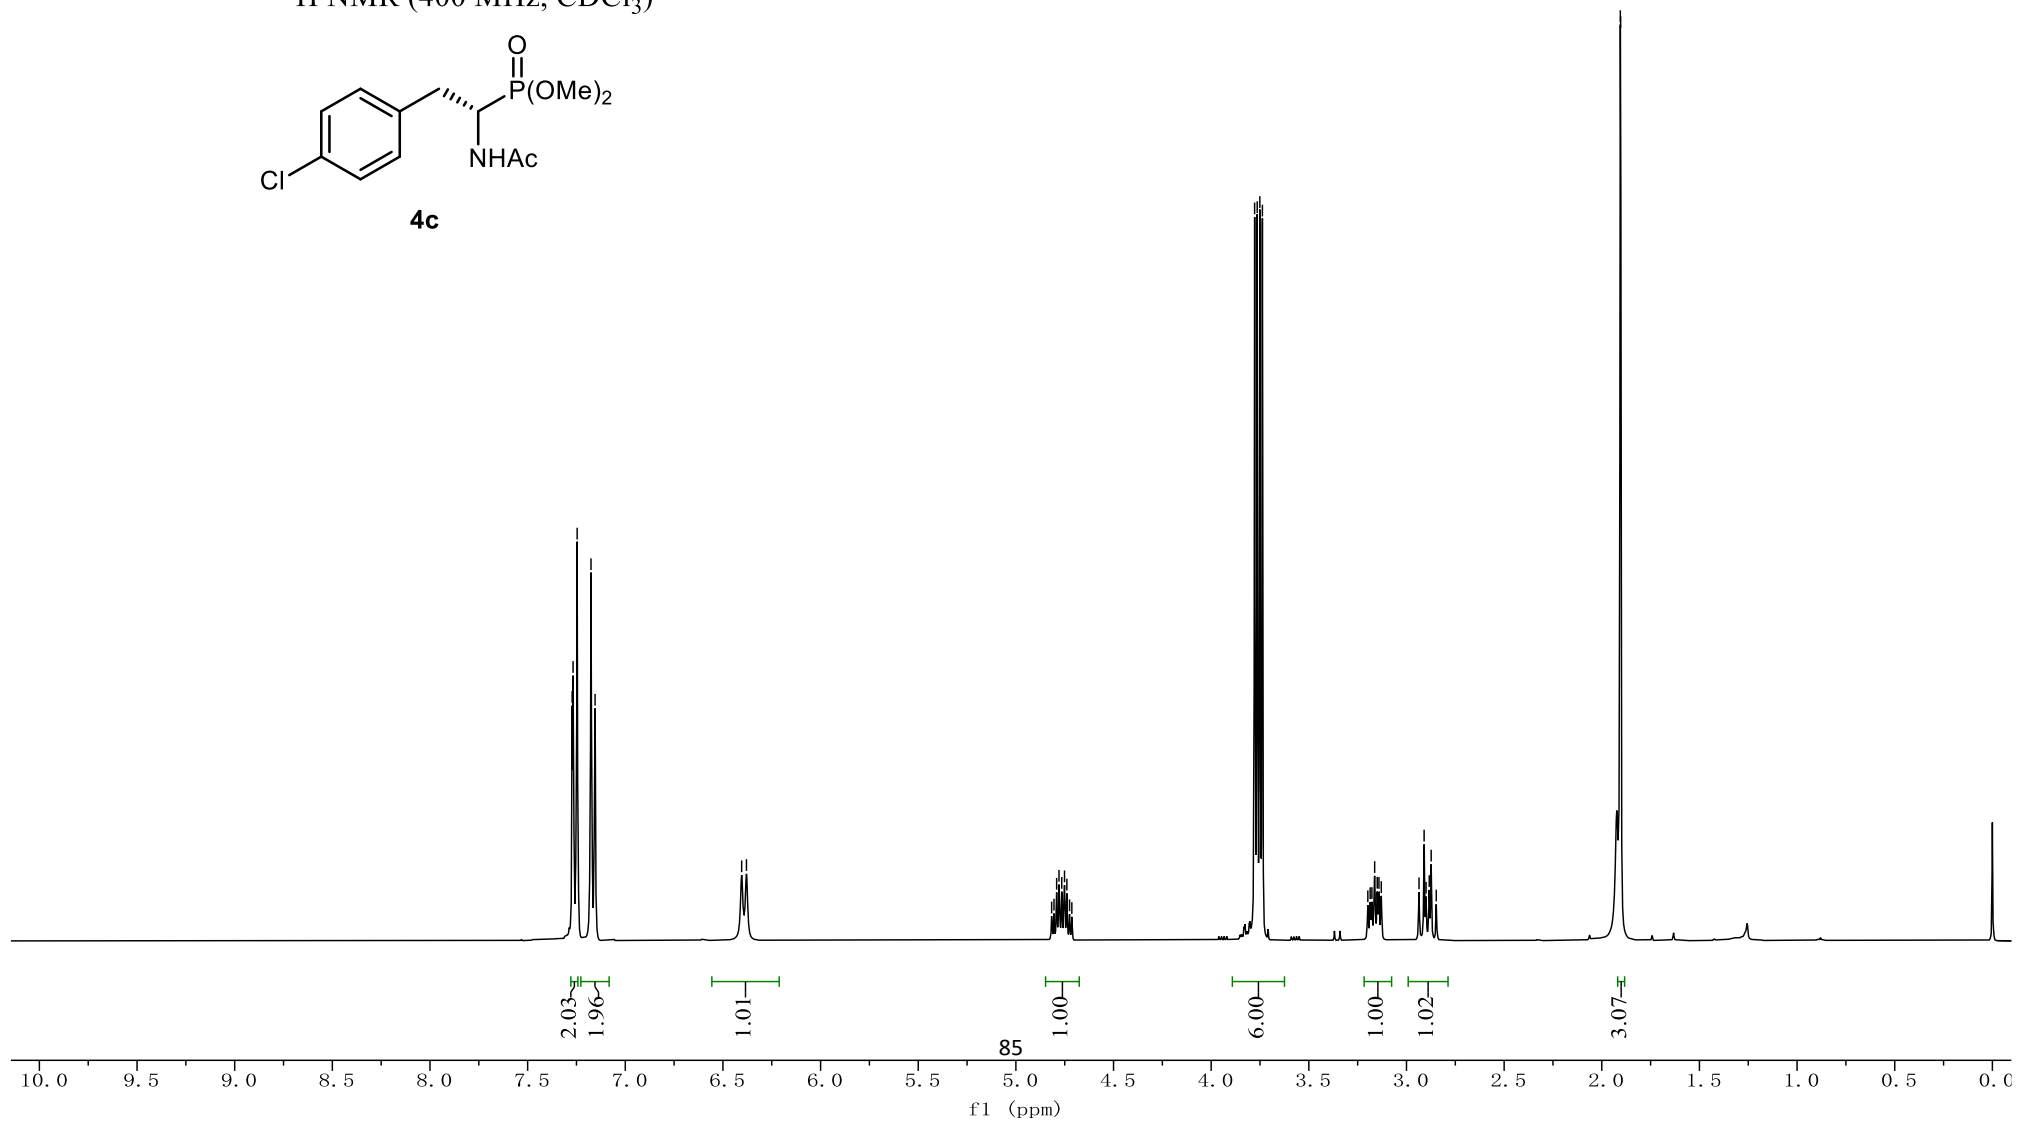

$^{13}\text{C}$  NMR (101 MHz,  $\text{CDCl}_3$ )

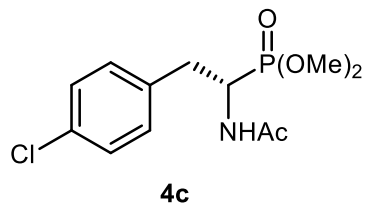

169.71  
169.66

135.02  
134.88  
132.78  
130.44  
128.59

53.56  
53.49  
52.98  
52.91  
46.19  
44.64

34.96  
34.93

22.84

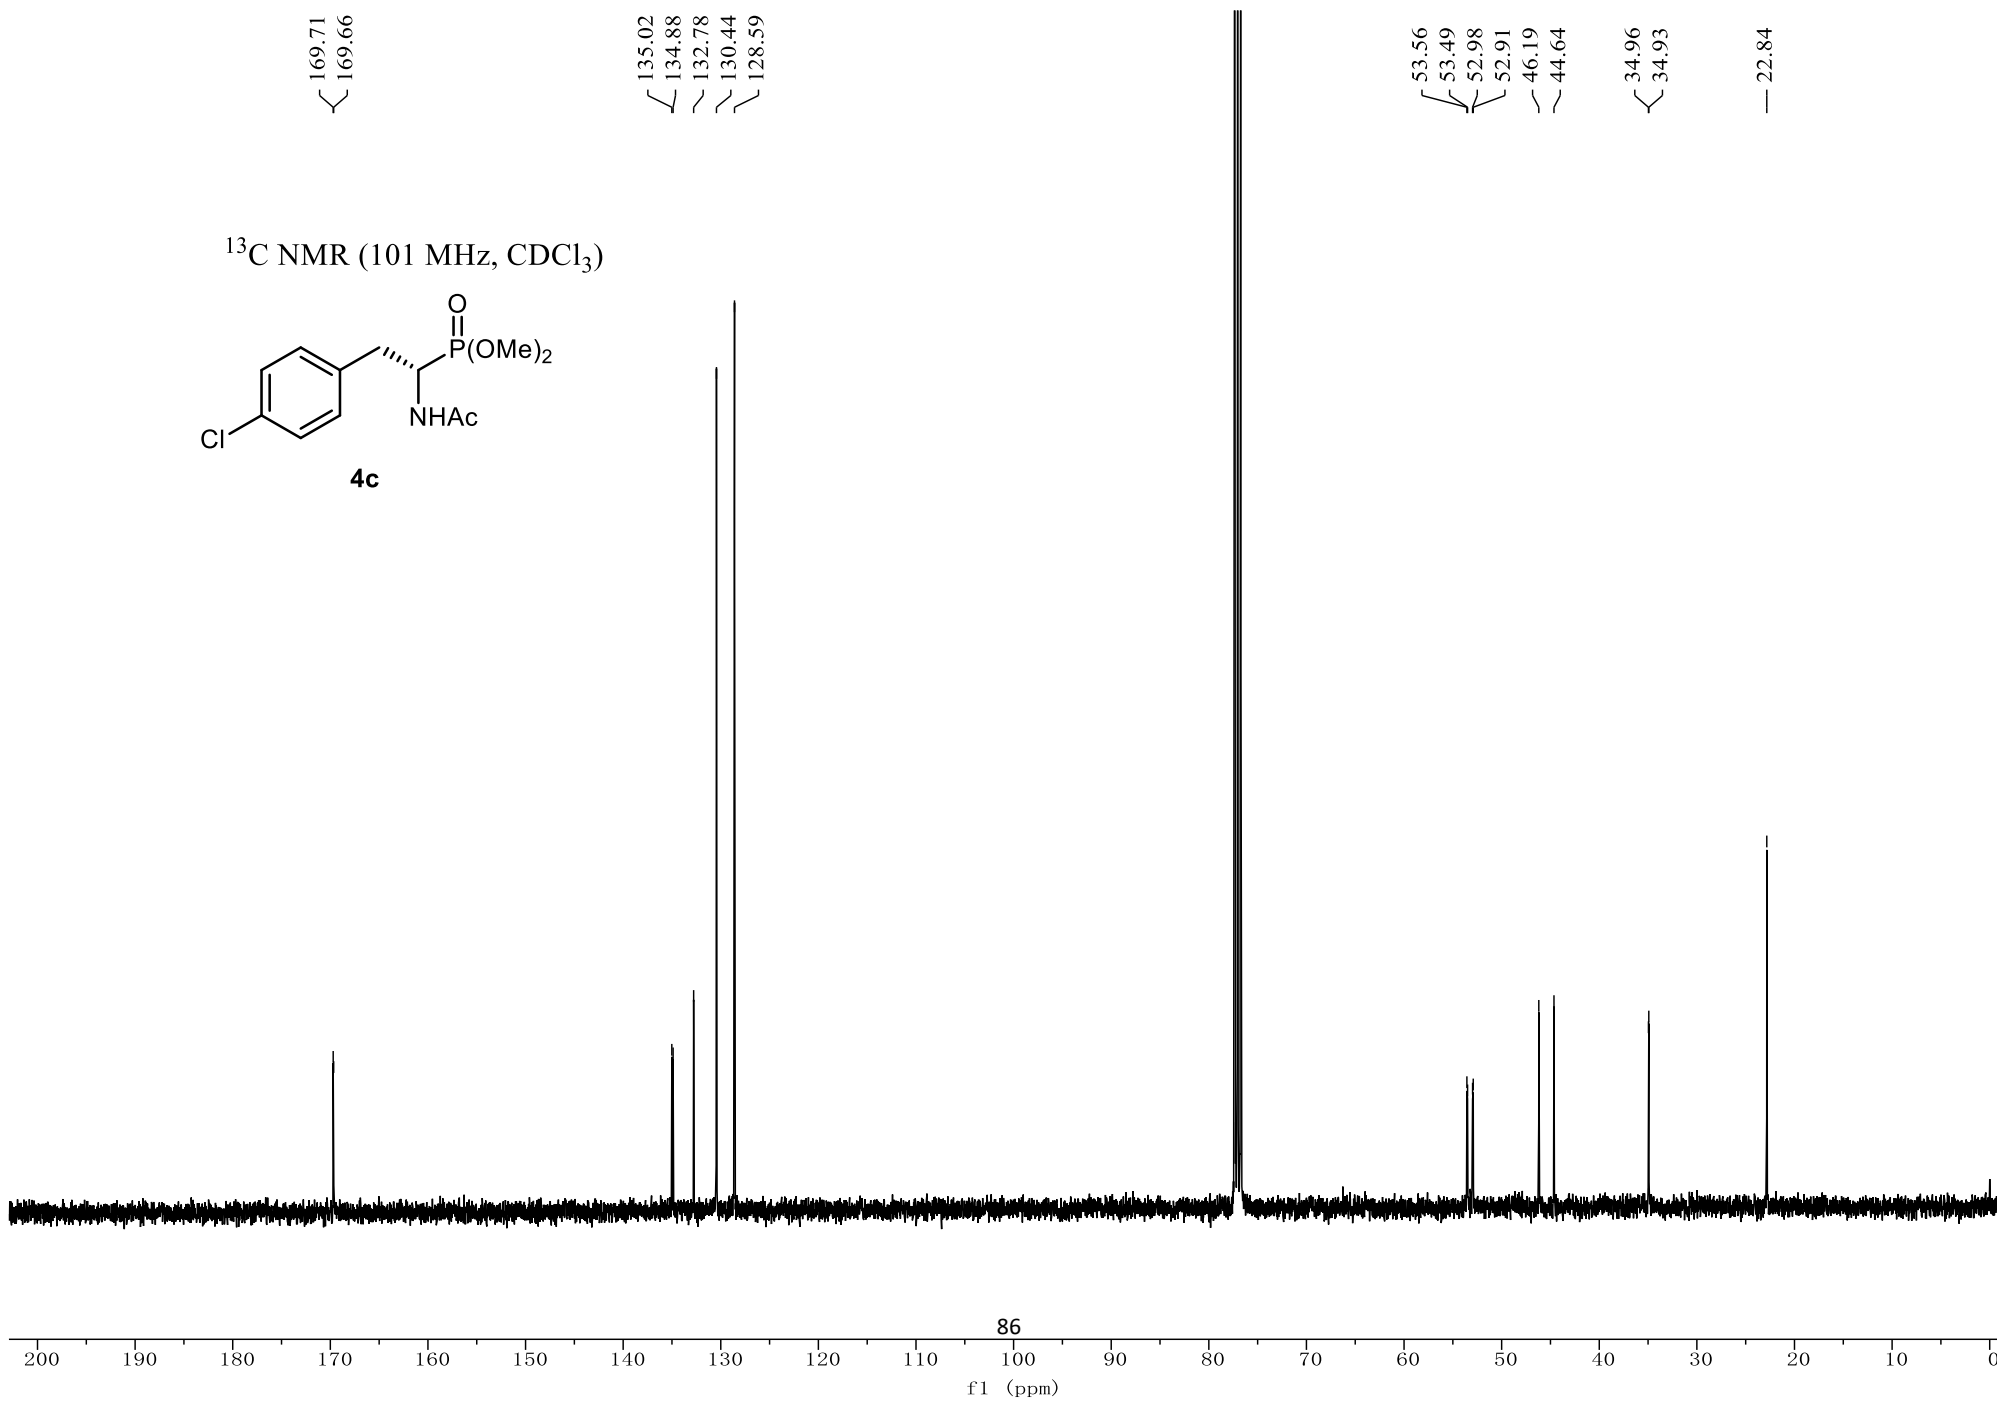

$^{31}\text{P}$  NMR (162 MHz,  $\text{CDCl}_3$ )

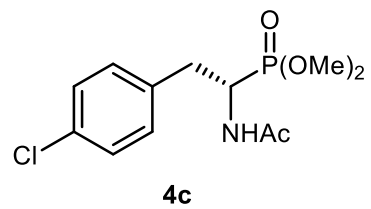

— 26.41

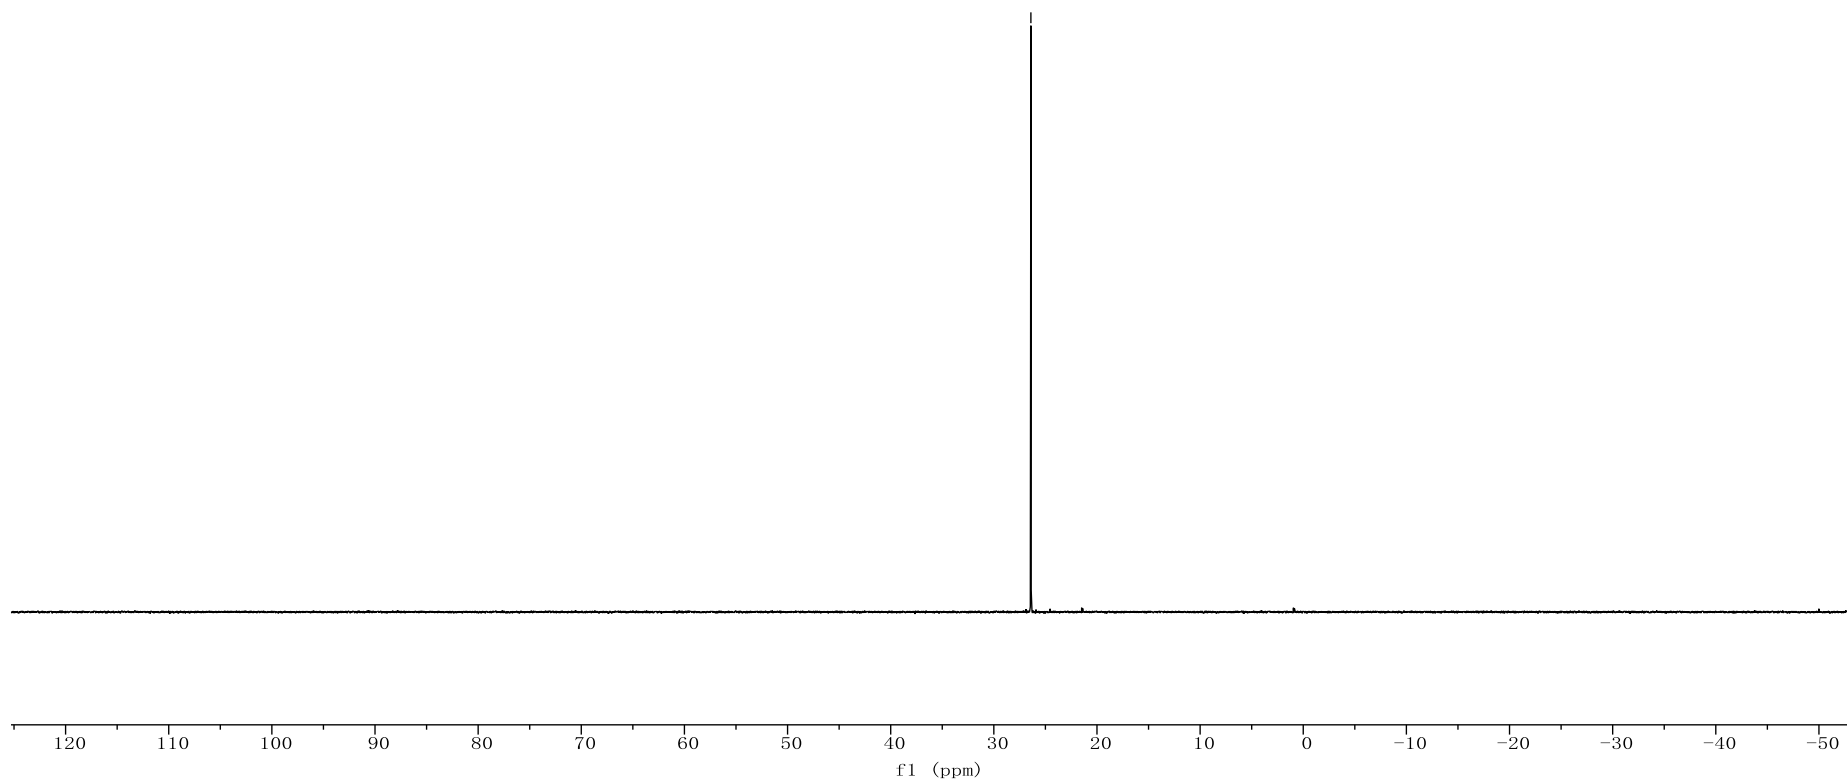



<sup>1</sup>H NMR (400 MHz, CDCl<sub>3</sub>)

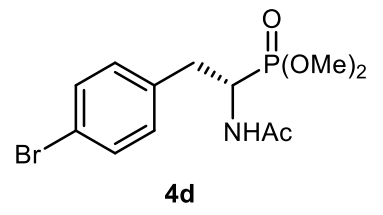

7.42  
7.40  
7.12  
7.10  
6.46  
6.44  
4.81  
4.80  
4.79  
4.78  
4.76  
4.75  
4.74  
4.72  
4.71  
3.78  
3.76  
3.75  
3.74  
3.18  
3.17  
3.16  
3.14  
3.13  
3.12  
3.11  
2.92  
2.90  
2.89  
2.87  
2.86  
2.84  
1.91

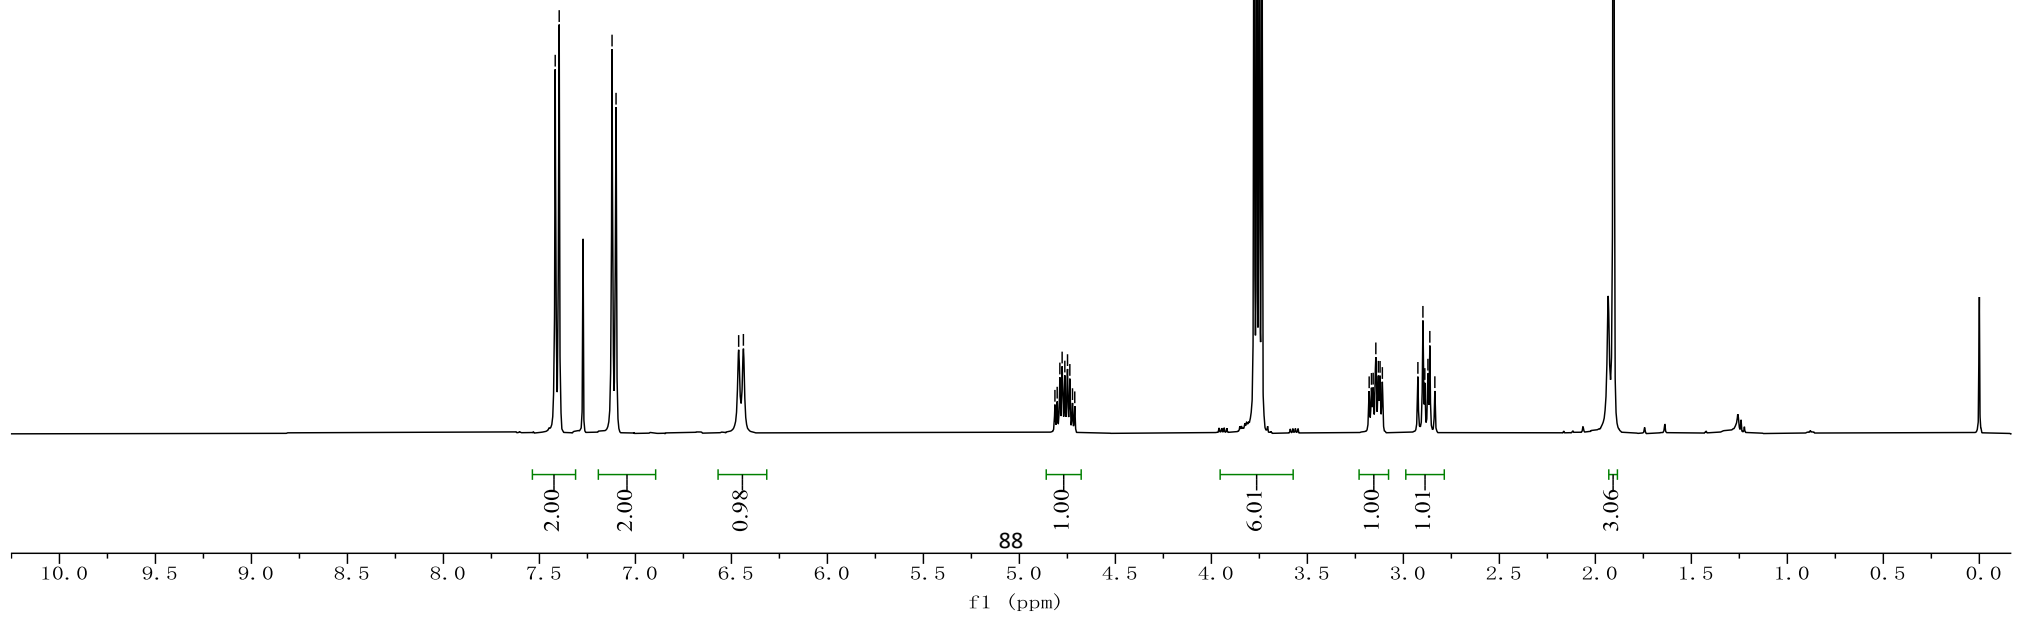

<sup>13</sup>C NMR (101 MHz, CDCl<sub>3</sub>)

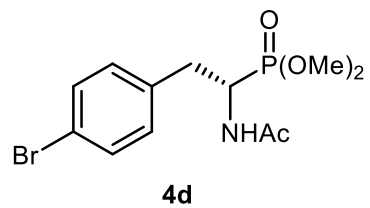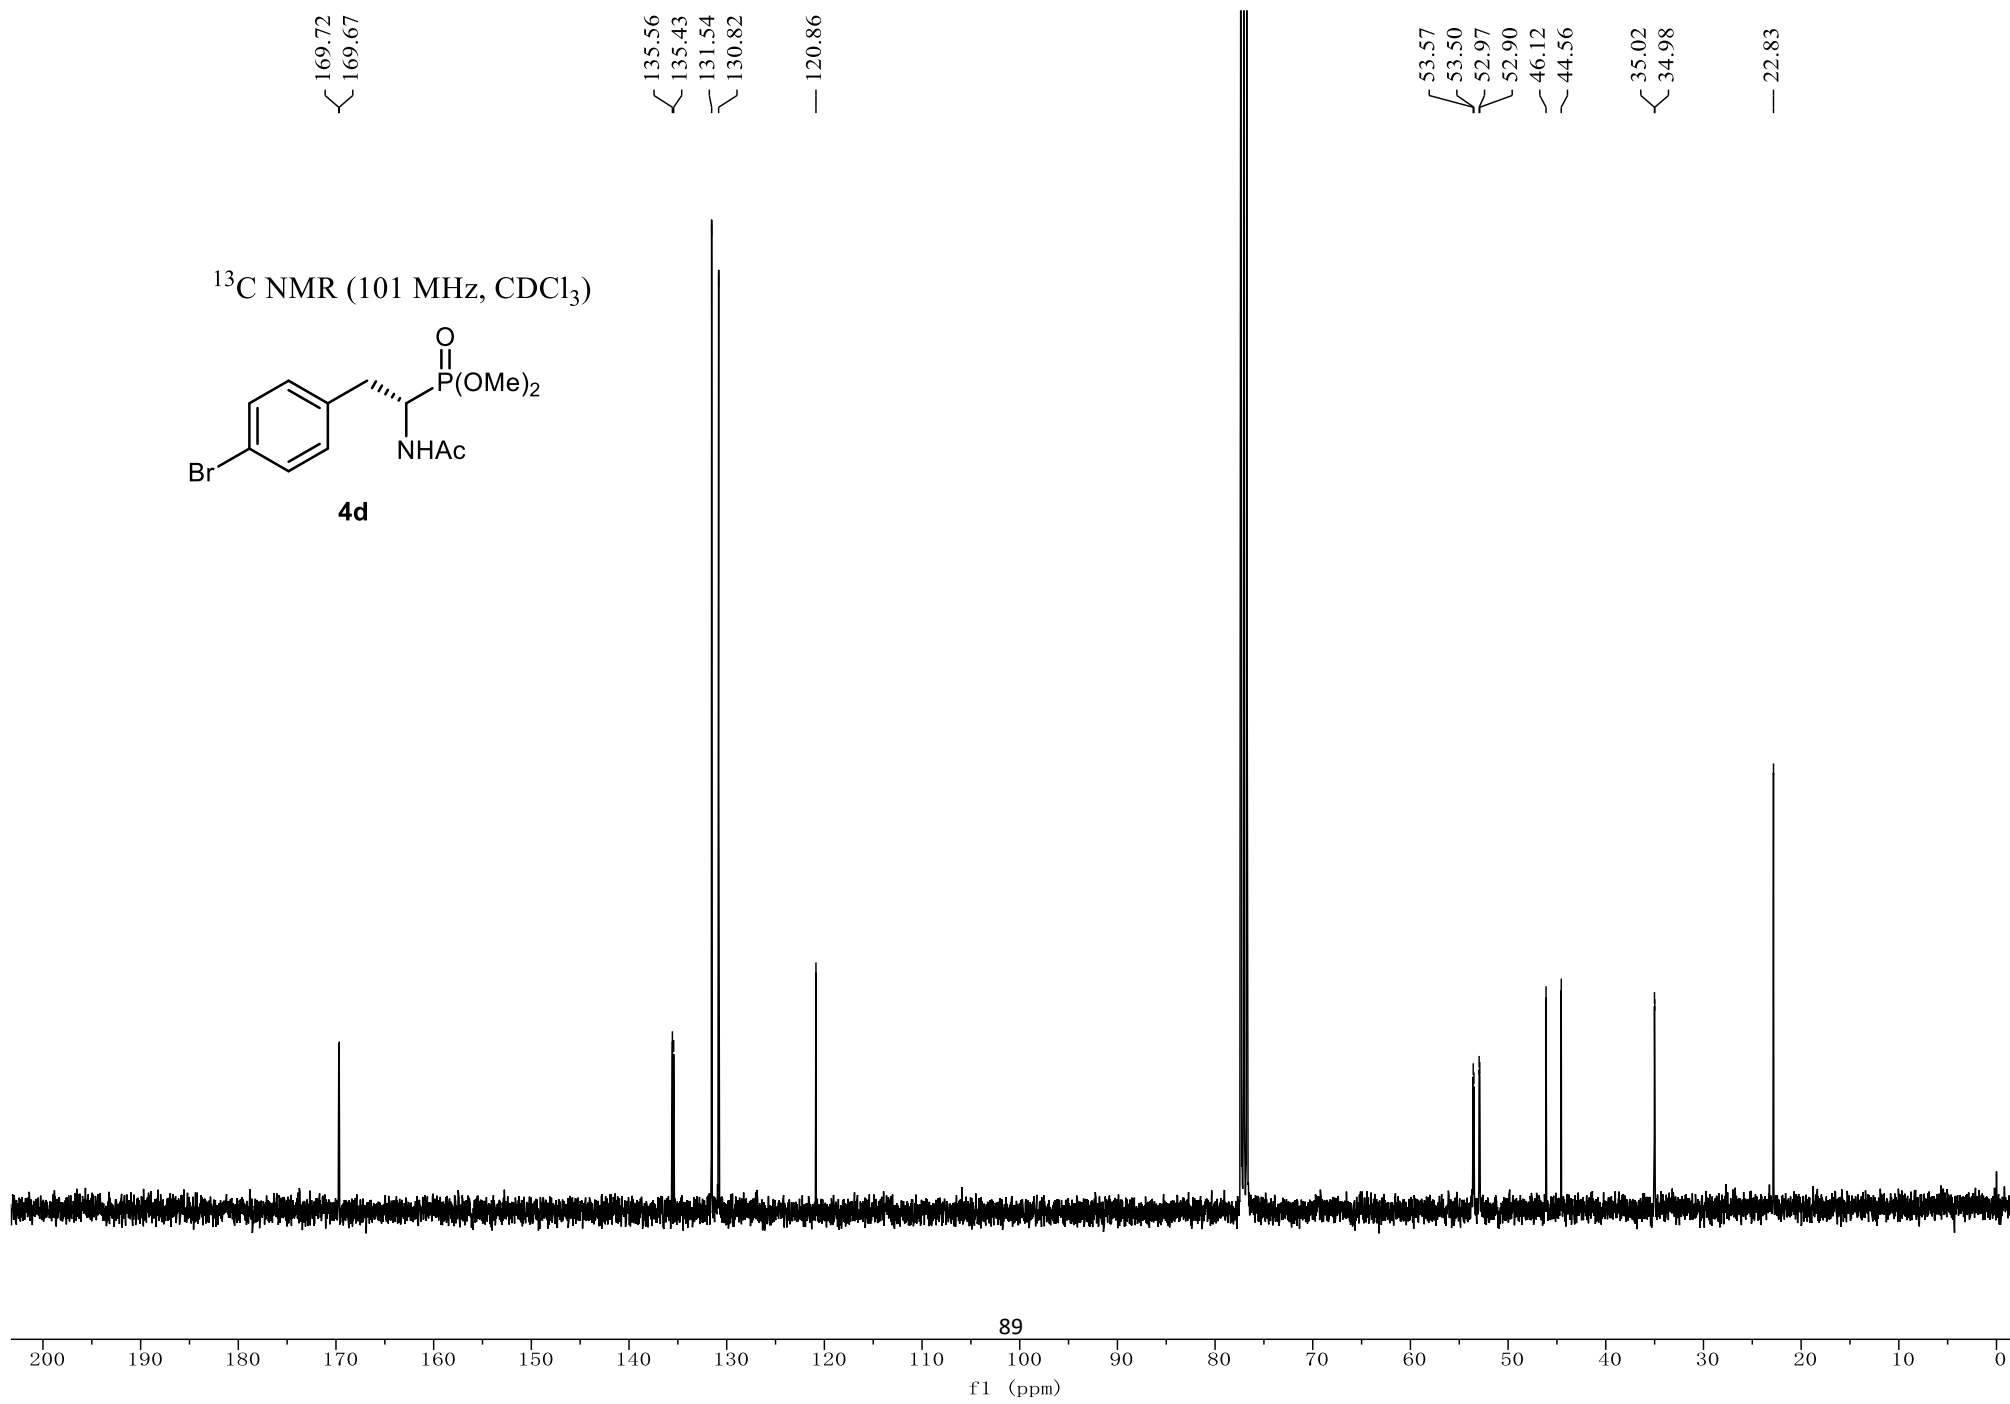

$^{31}\text{P}$  NMR (162 MHz,  $\text{CDCl}_3$ )

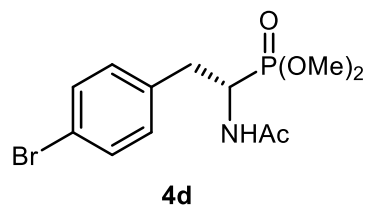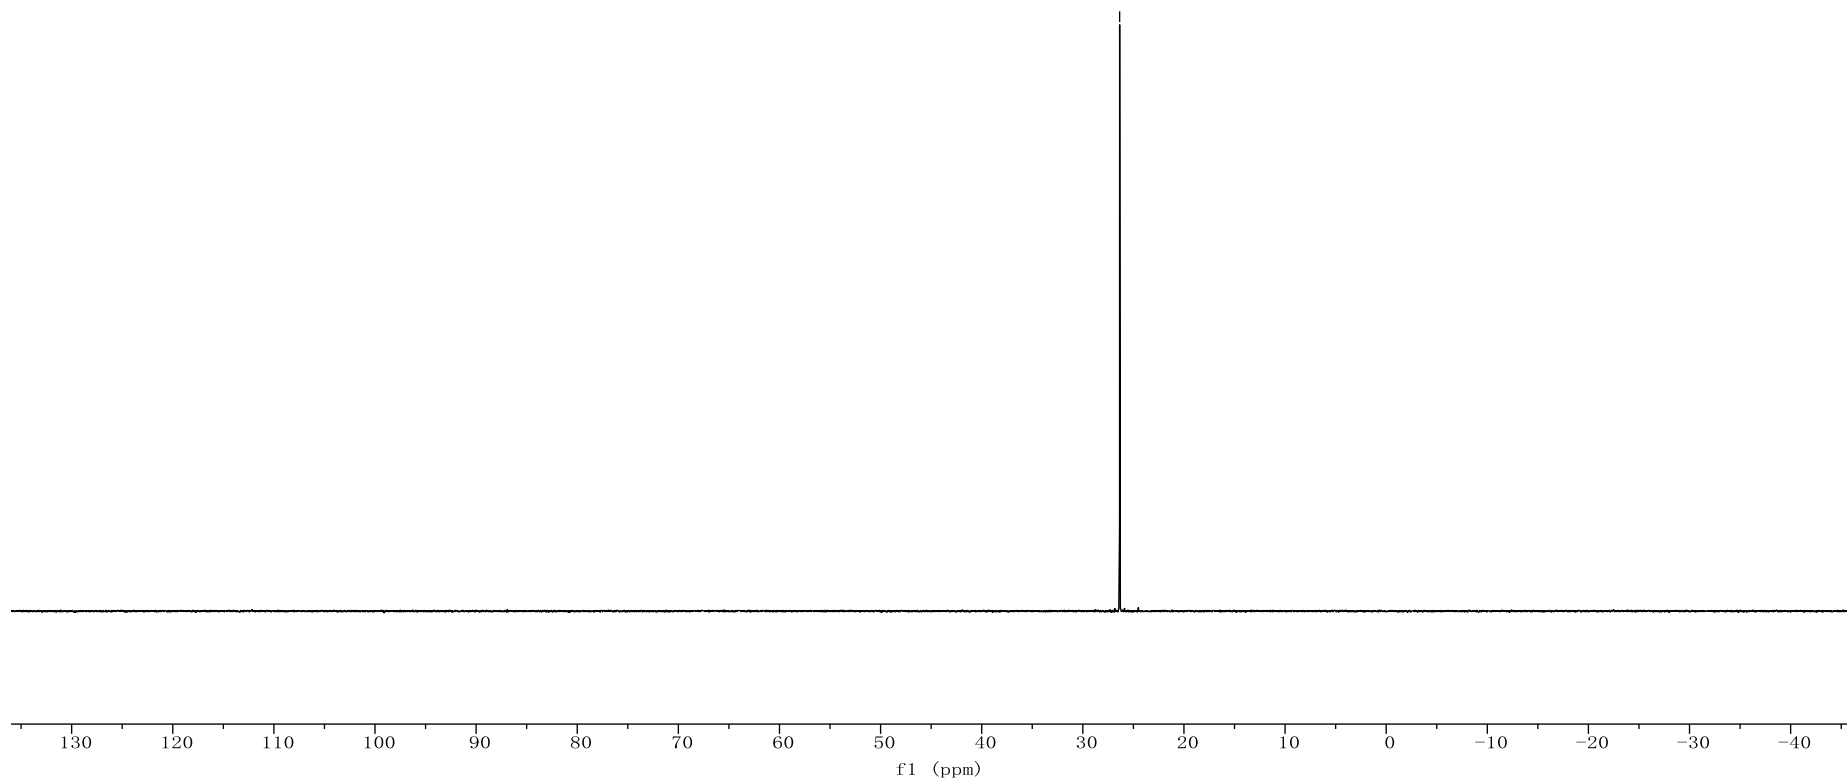

<sup>1</sup>H NMR (400 MHz, CDCl<sub>3</sub>)

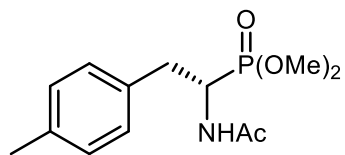

**4e**

7.12  
7.10  
7.09  
7.07

6.31  
6.28

4.82  
4.81  
4.79  
4.78  
4.77  
4.76  
4.74  
4.73  
4.72

3.77  
3.76  
3.74  
3.73

3.20  
3.19  
3.18  
3.17  
3.15  
3.14  
3.13  
2.92  
2.90  
2.89  
2.87  
2.86  
2.83  
2.30  
1.89

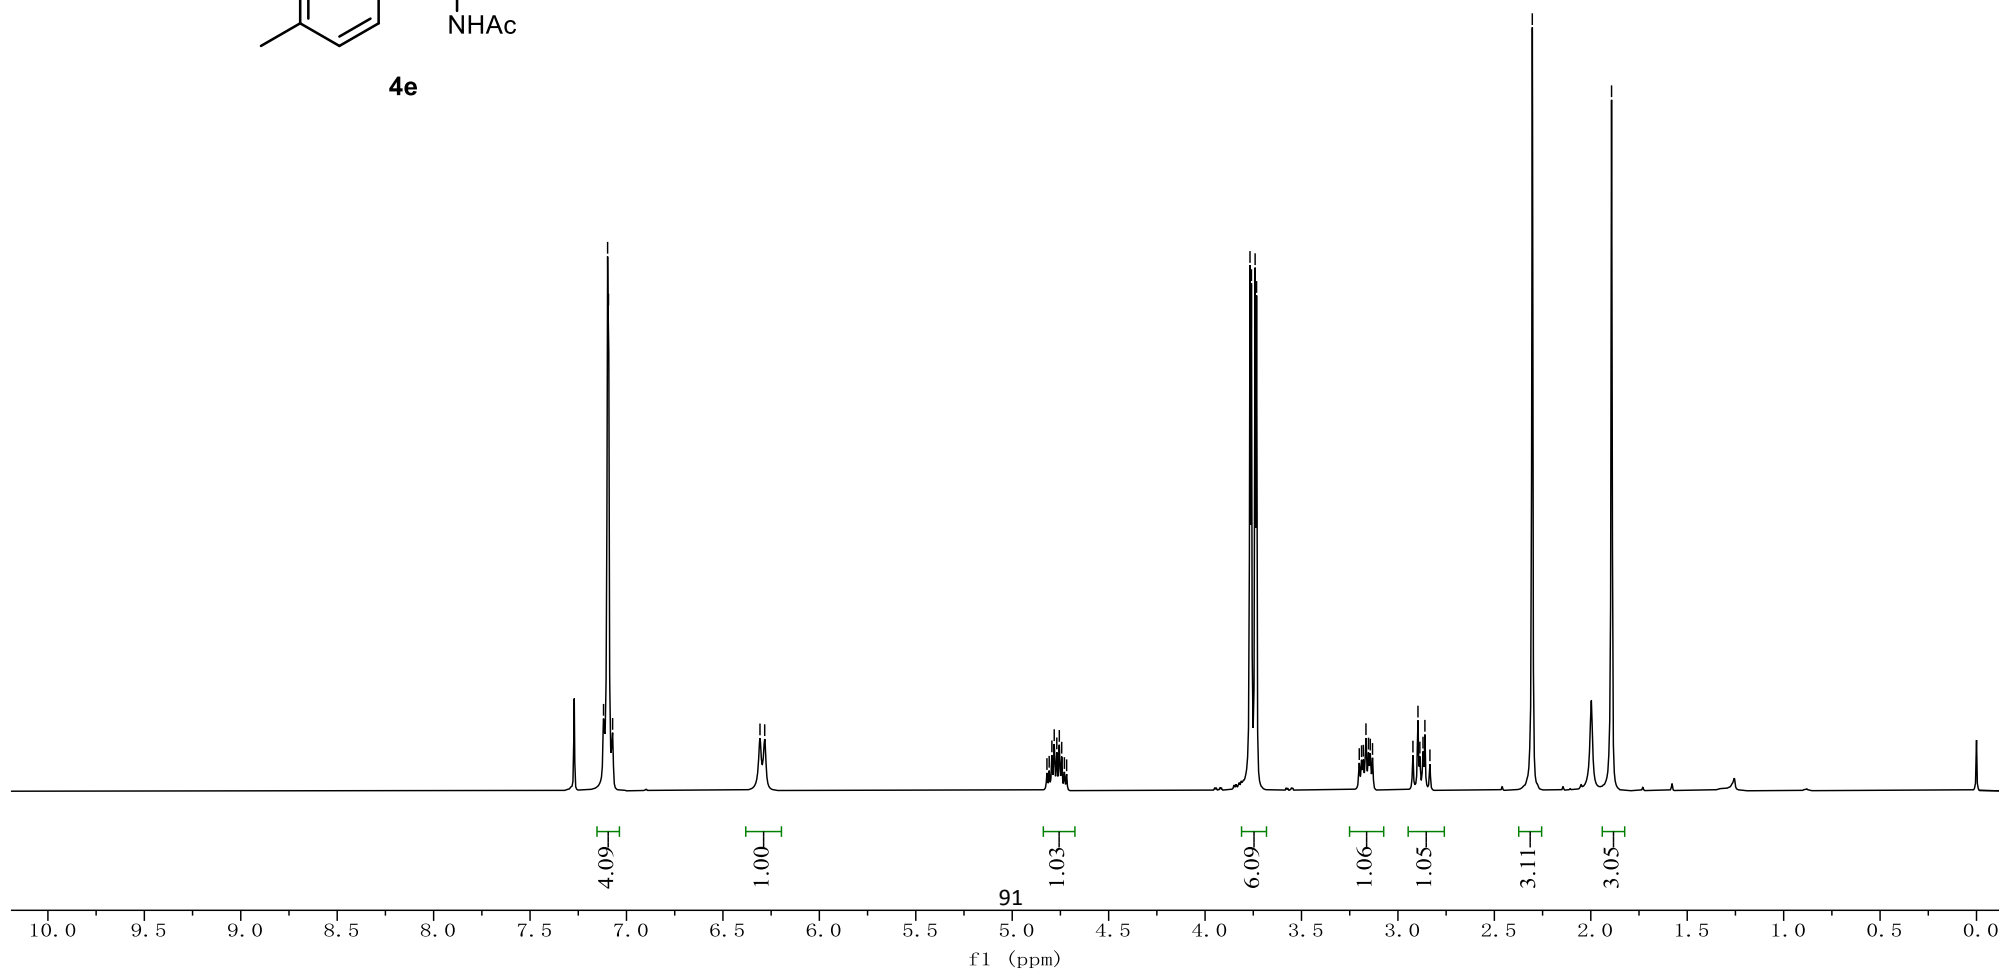

$^{13}\text{C}$  NMR (101 MHz,  $\text{CDCl}_3$ )

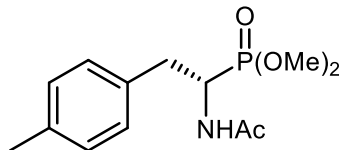

**4e**

169.67  
169.63

136.40  
133.32  
133.19  
129.15  
128.93

53.44  
53.37  
52.96  
52.89  
46.46  
44.91

35.10  
35.07

22.88  
21.05

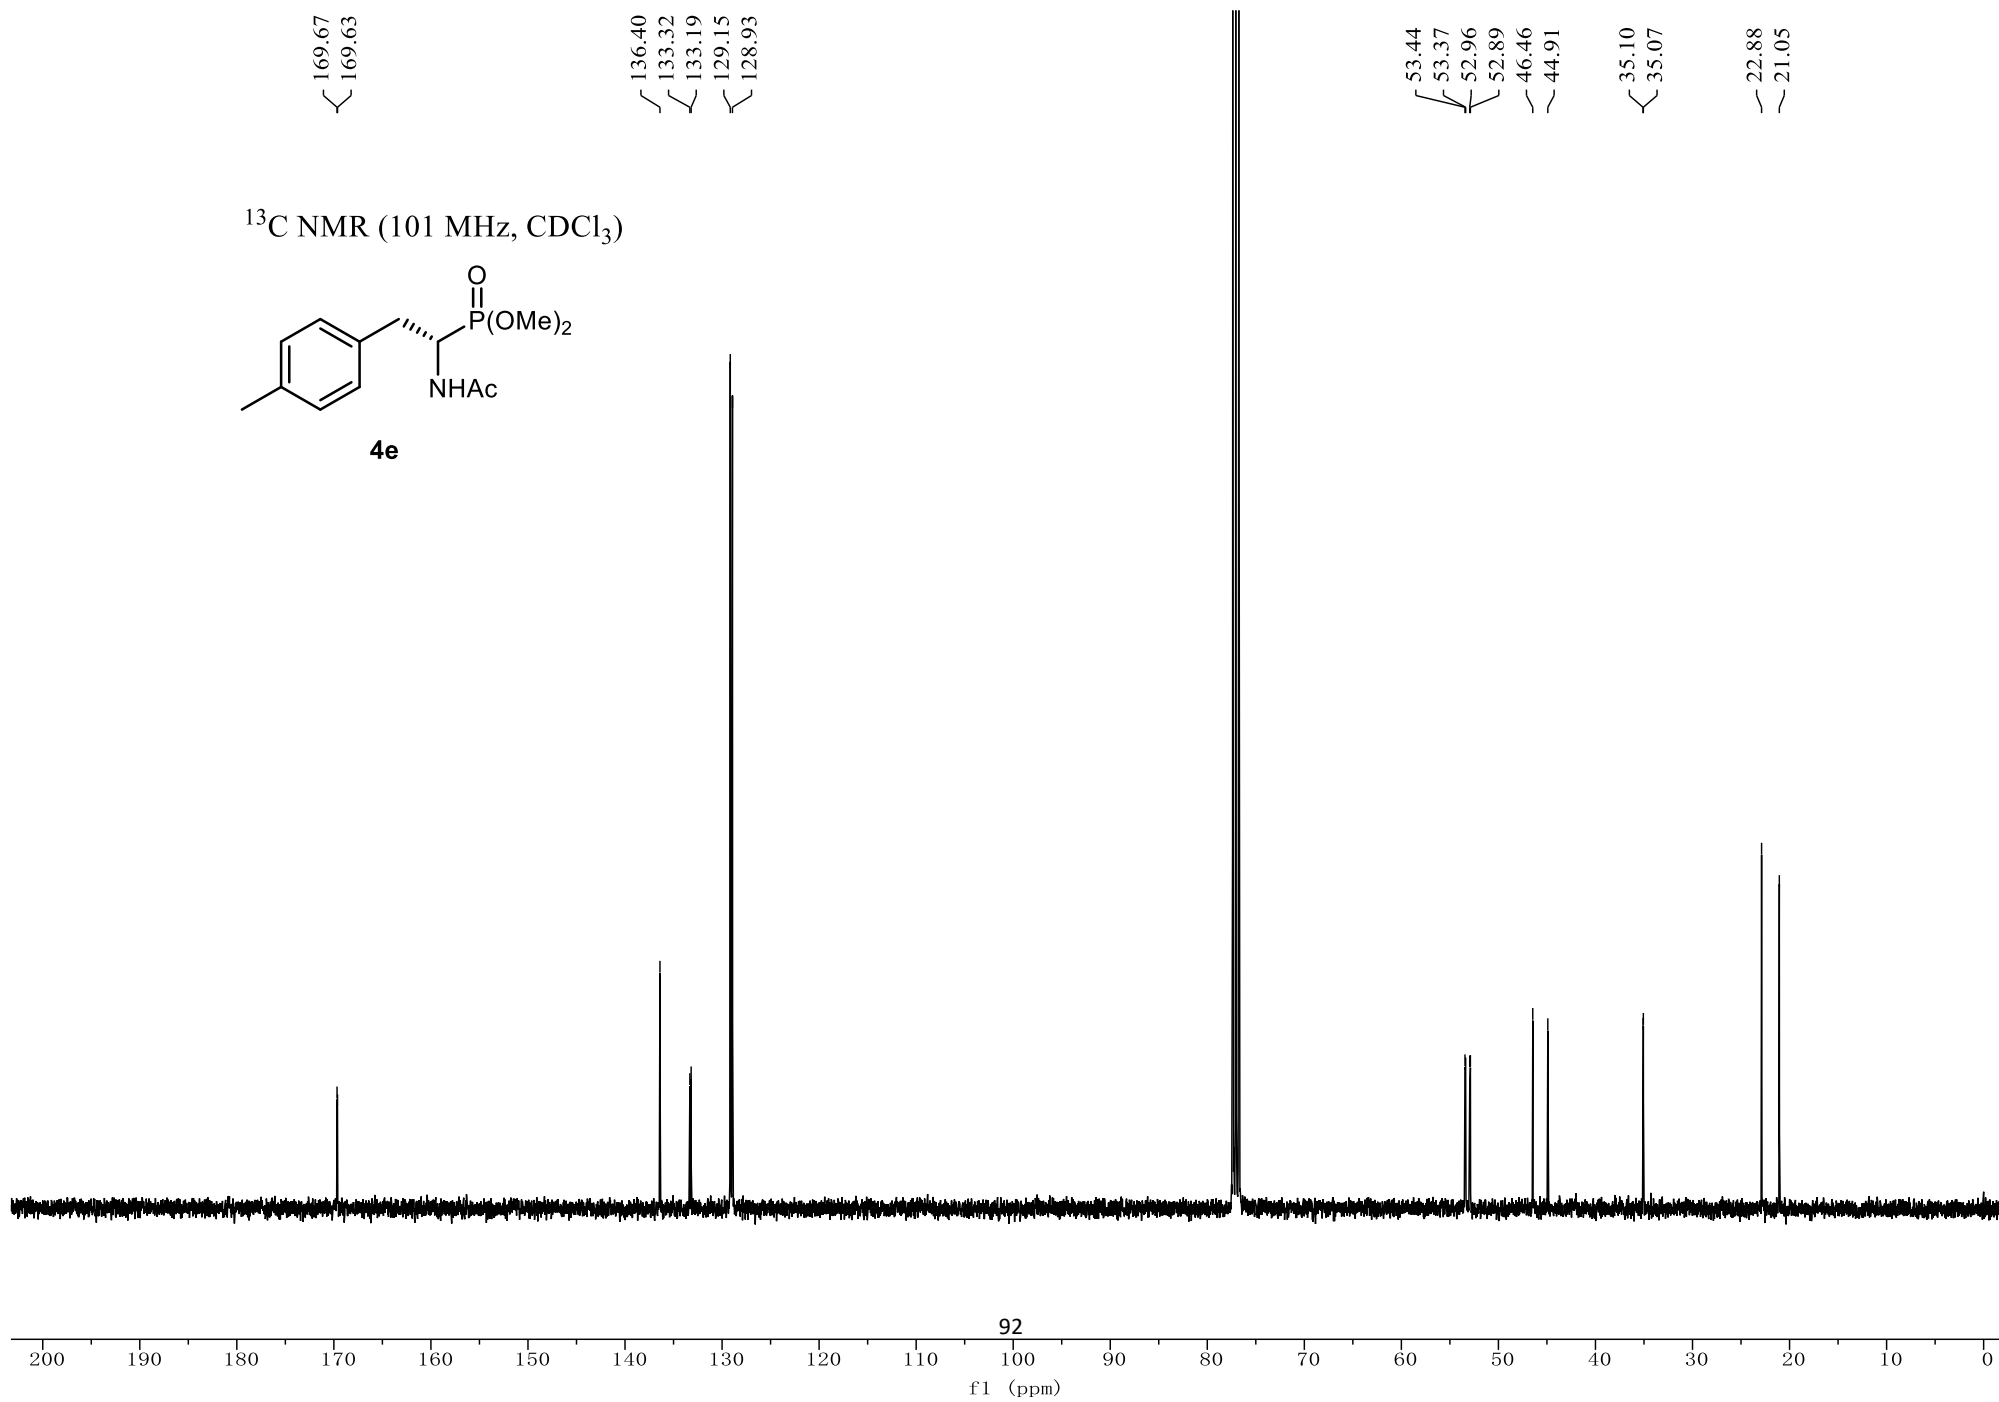

92

f1 (ppm)

$^{31}\text{P}$  NMR (162 MHz,  $\text{CDCl}_3$ )

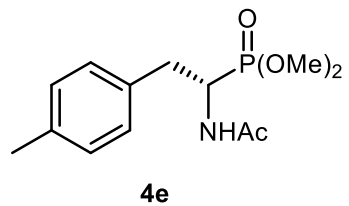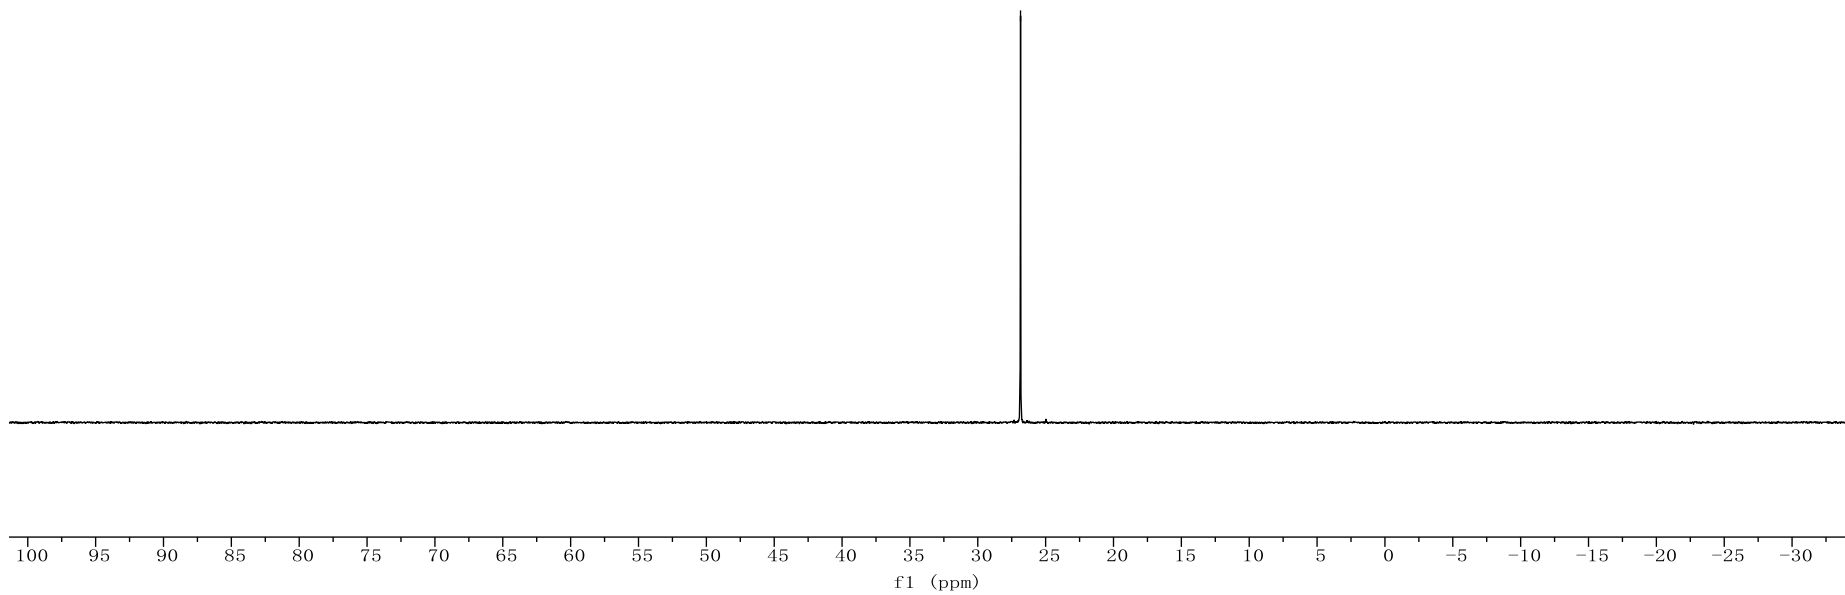

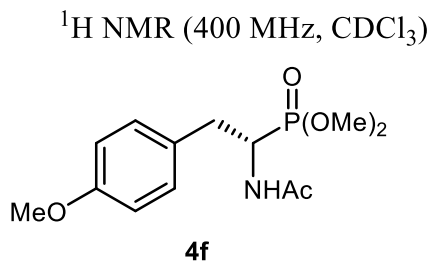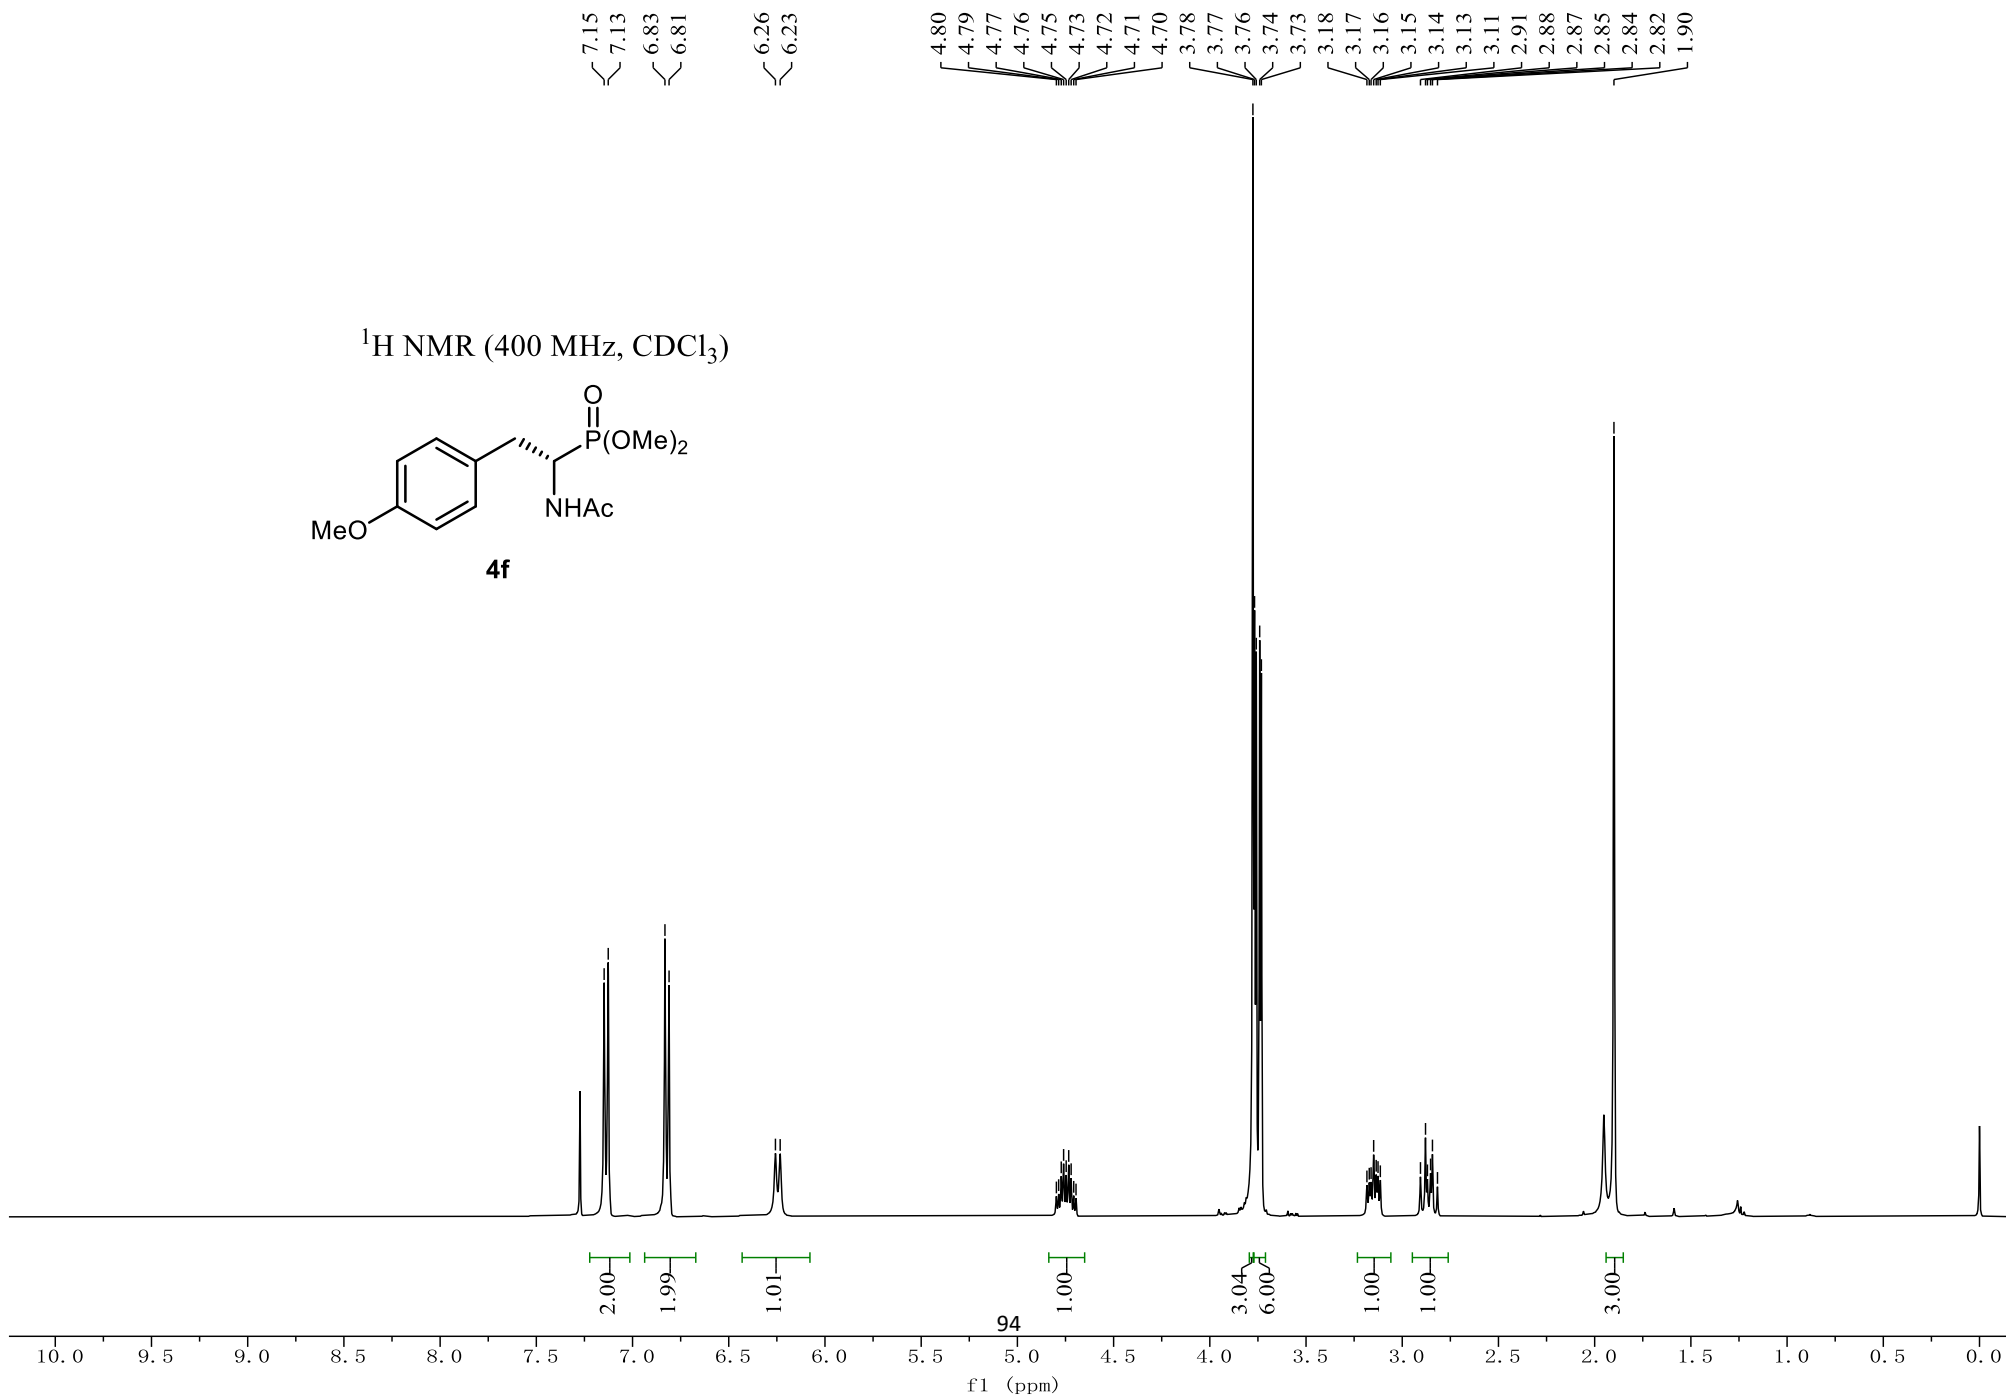

<sup>13</sup>C NMR (101 MHz, CDCl<sub>3</sub>)

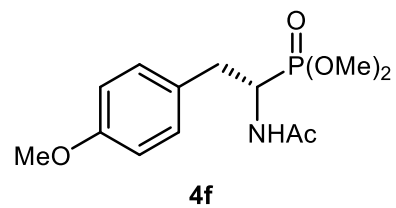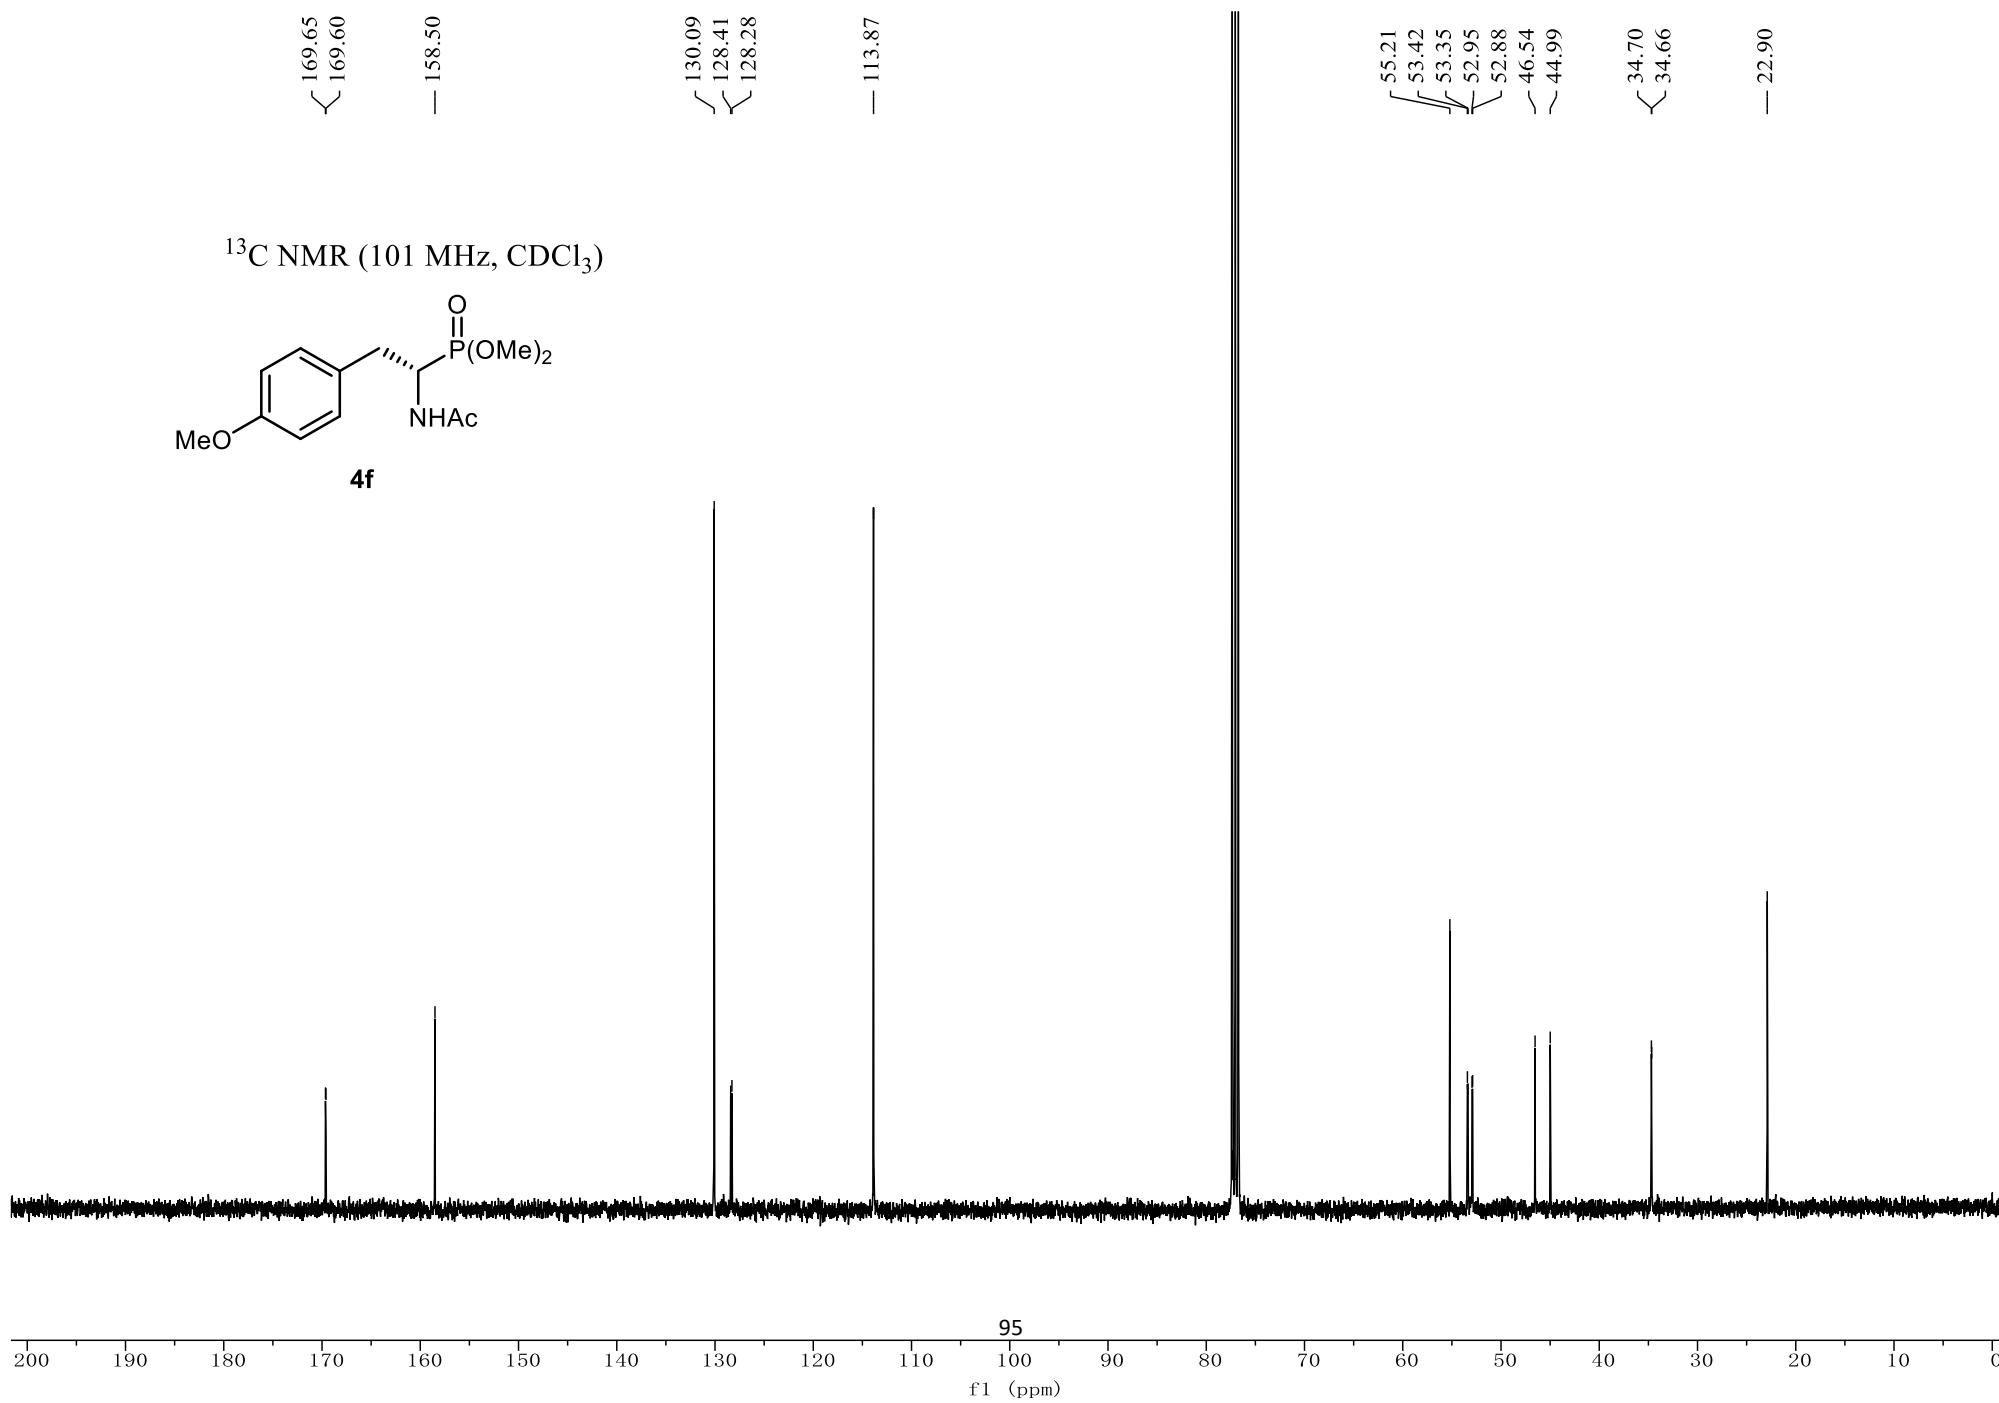



$^{31}\text{P}$  NMR (162 MHz,  $\text{CDCl}_3$ )

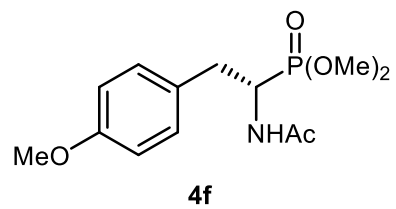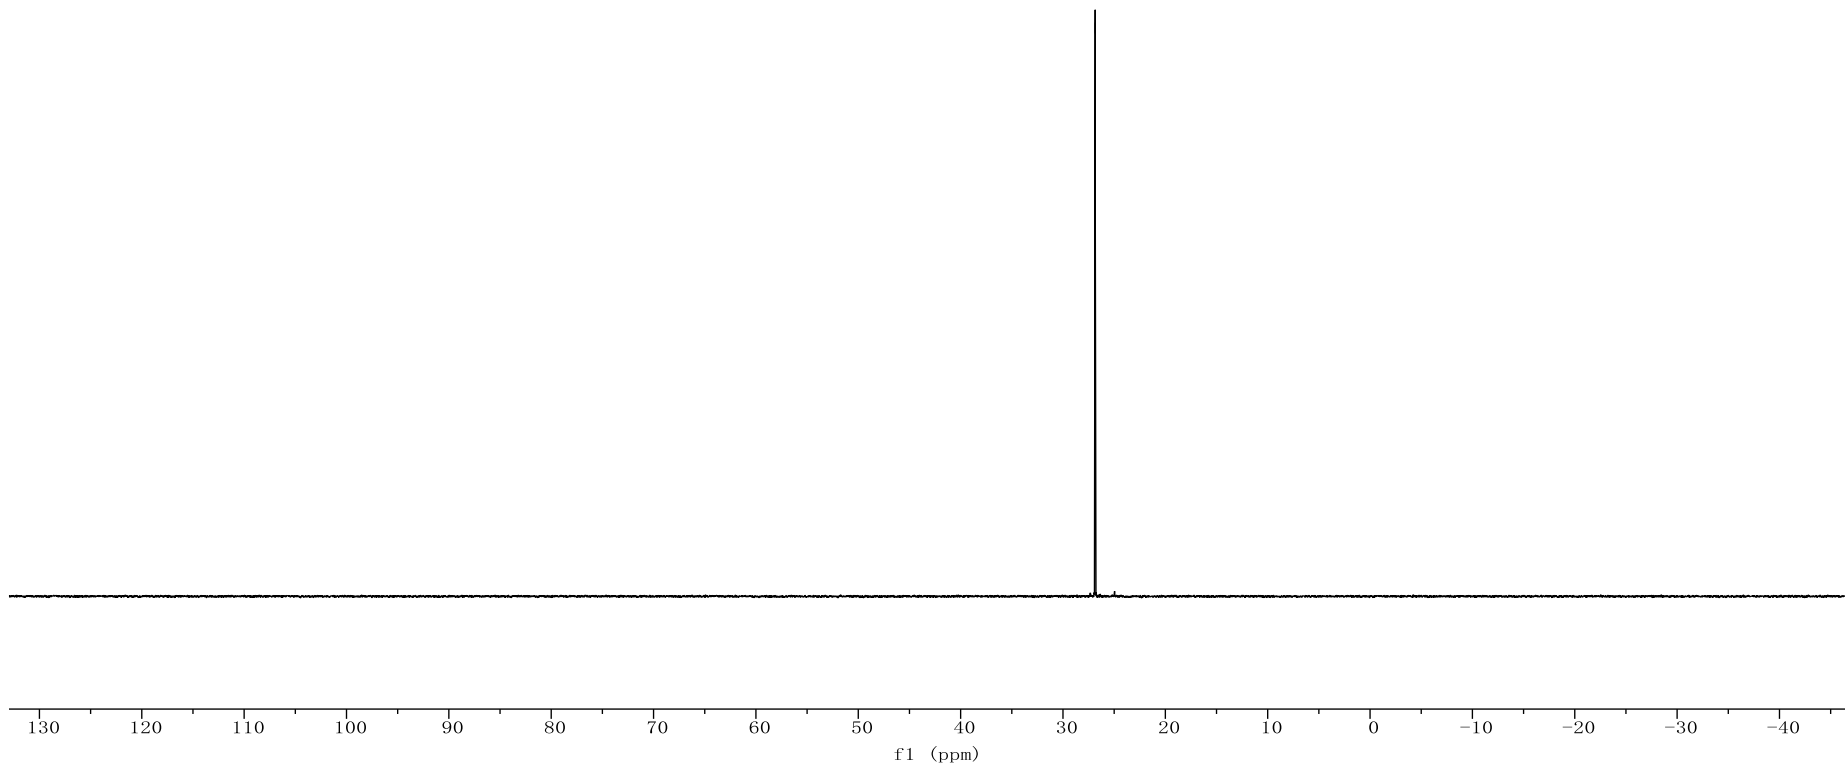

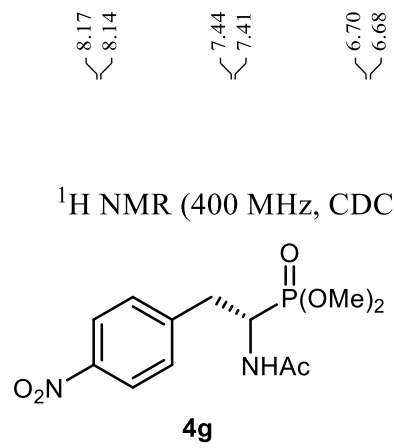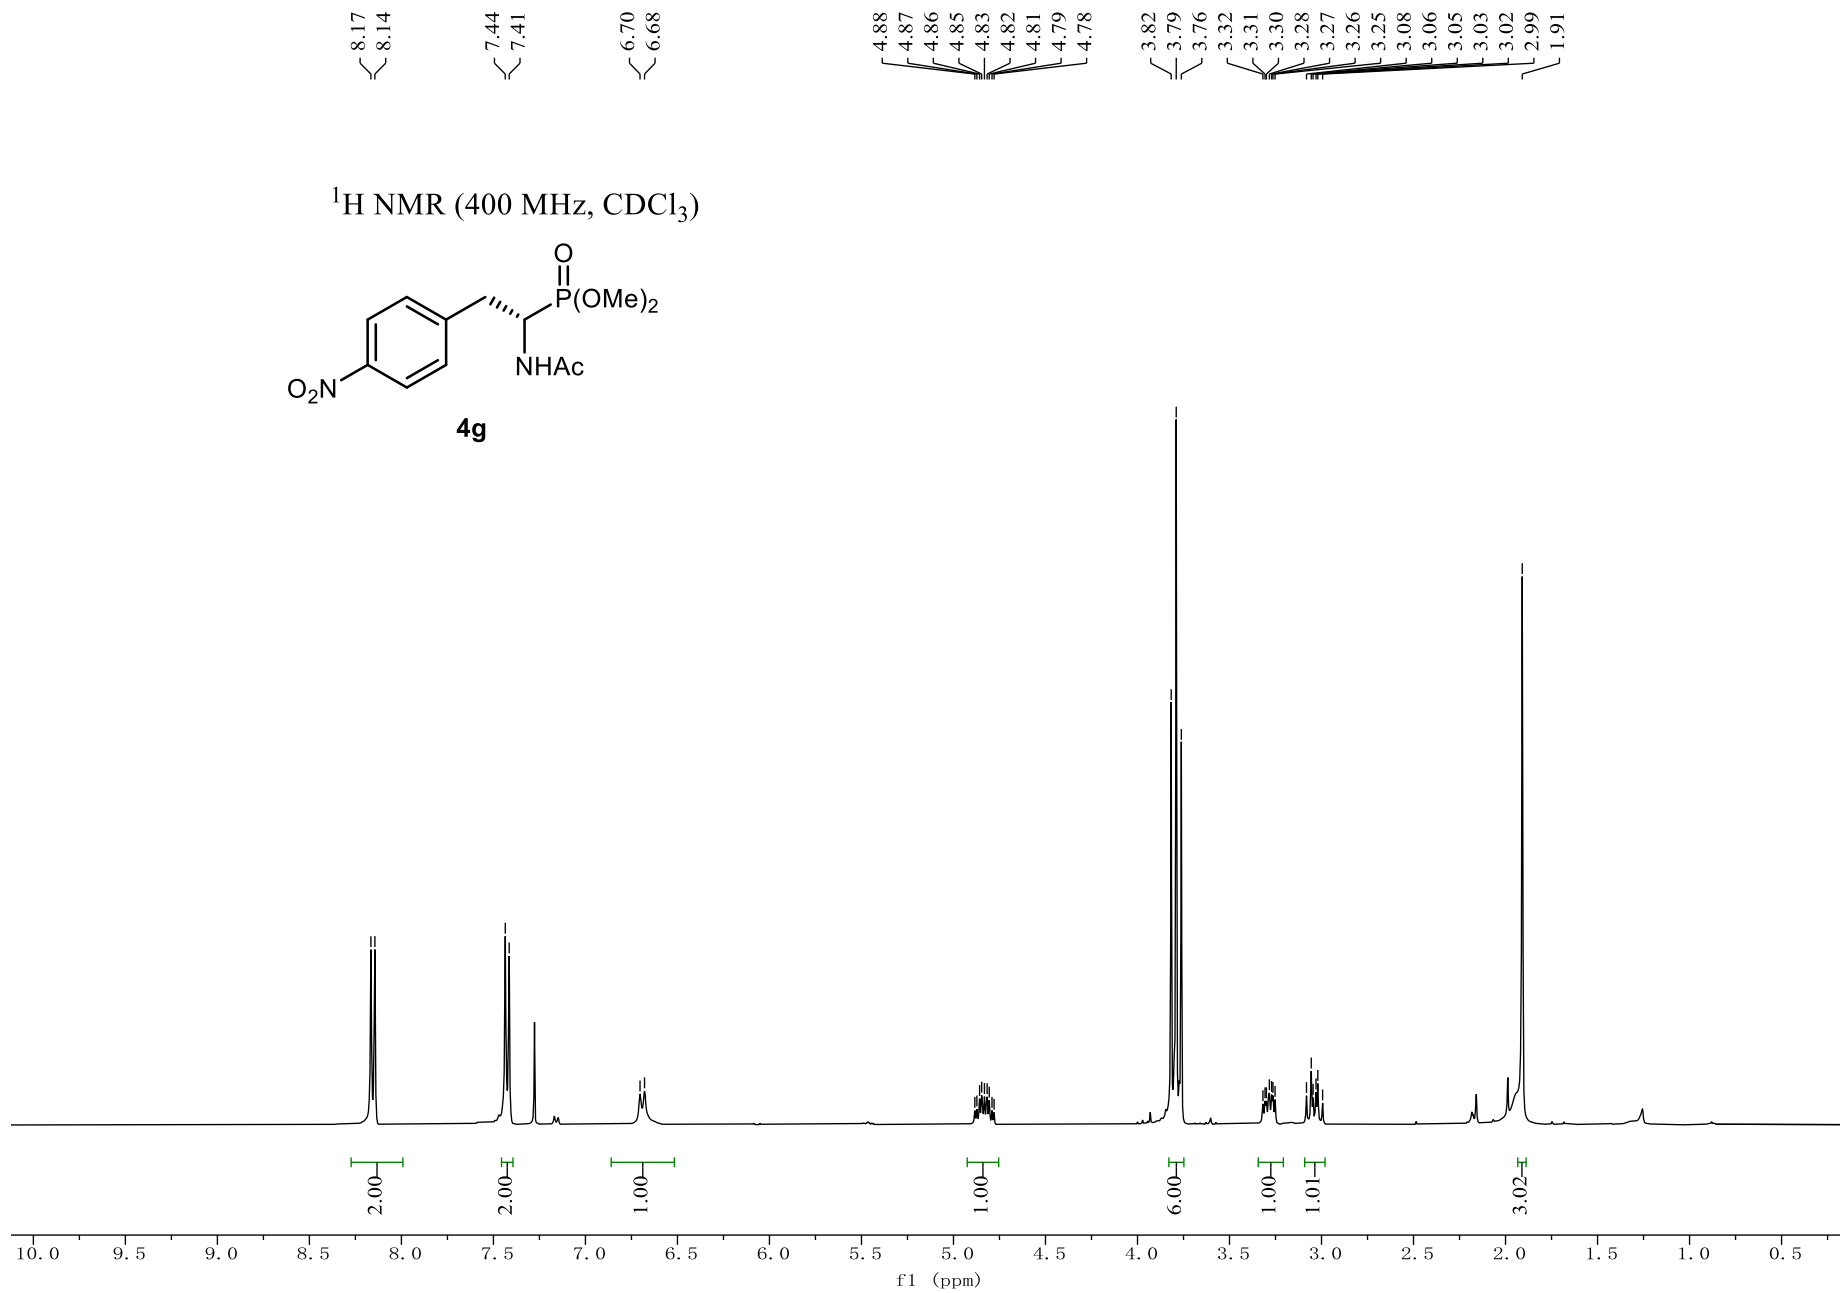

169.82  
169.77

147.05  
144.48  
144.35

130.03  
123.63

53.79  
53.72  
53.07  
53.00  
45.95  
44.39

35.50  
35.47

22.75

$^{13}\text{C}$  NMR (101 MHz,  $\text{CDCl}_3$ )

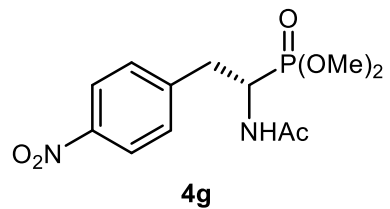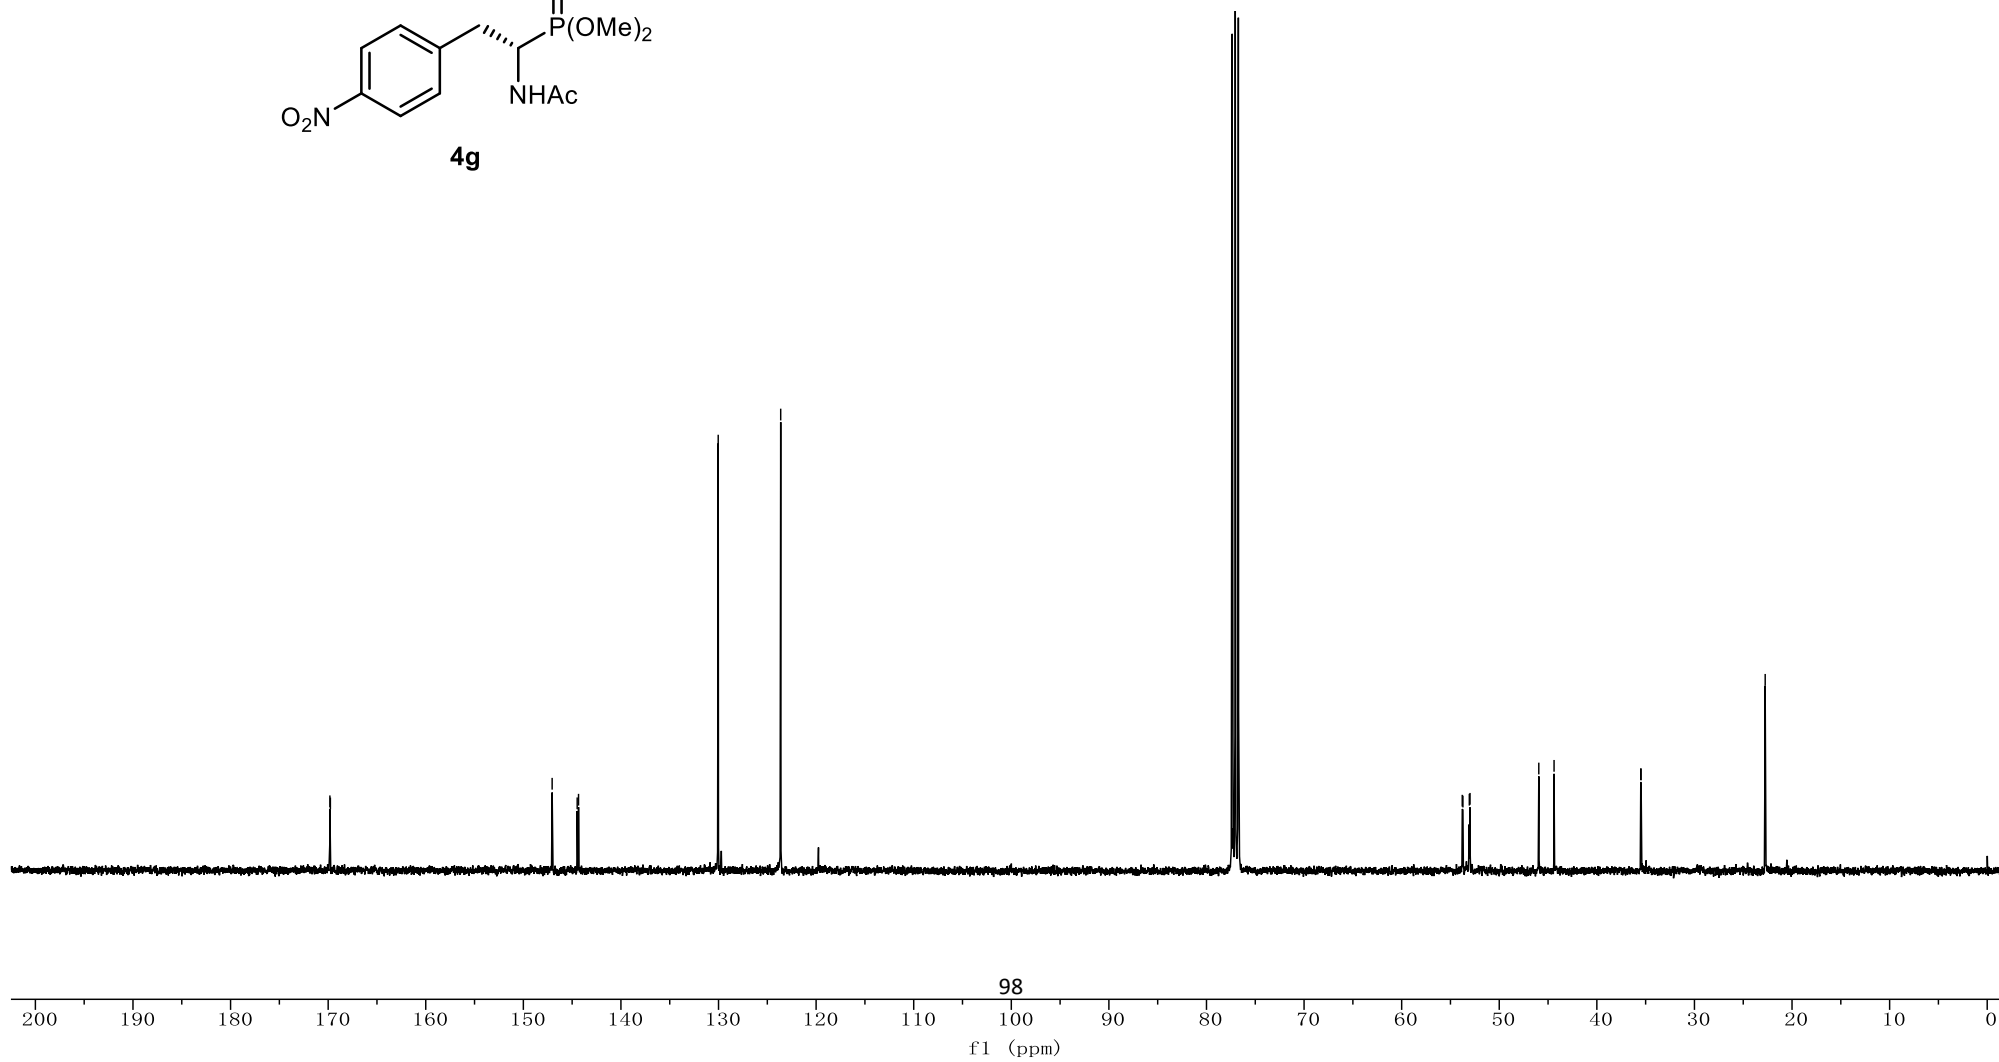

$^{31}\text{P}$  NMR (162 MHz,  $\text{CDCl}_3$ )

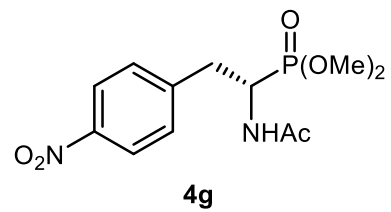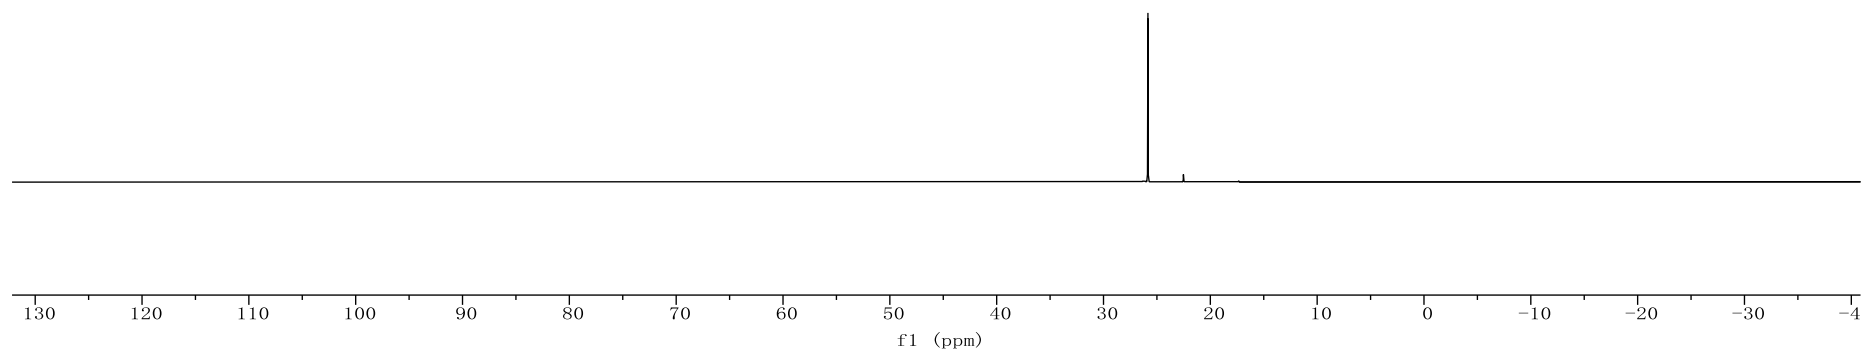

$^1\text{H}$  NMR (400 MHz,  $\text{CDCl}_3$ )

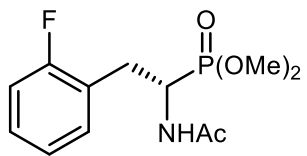

**4h**

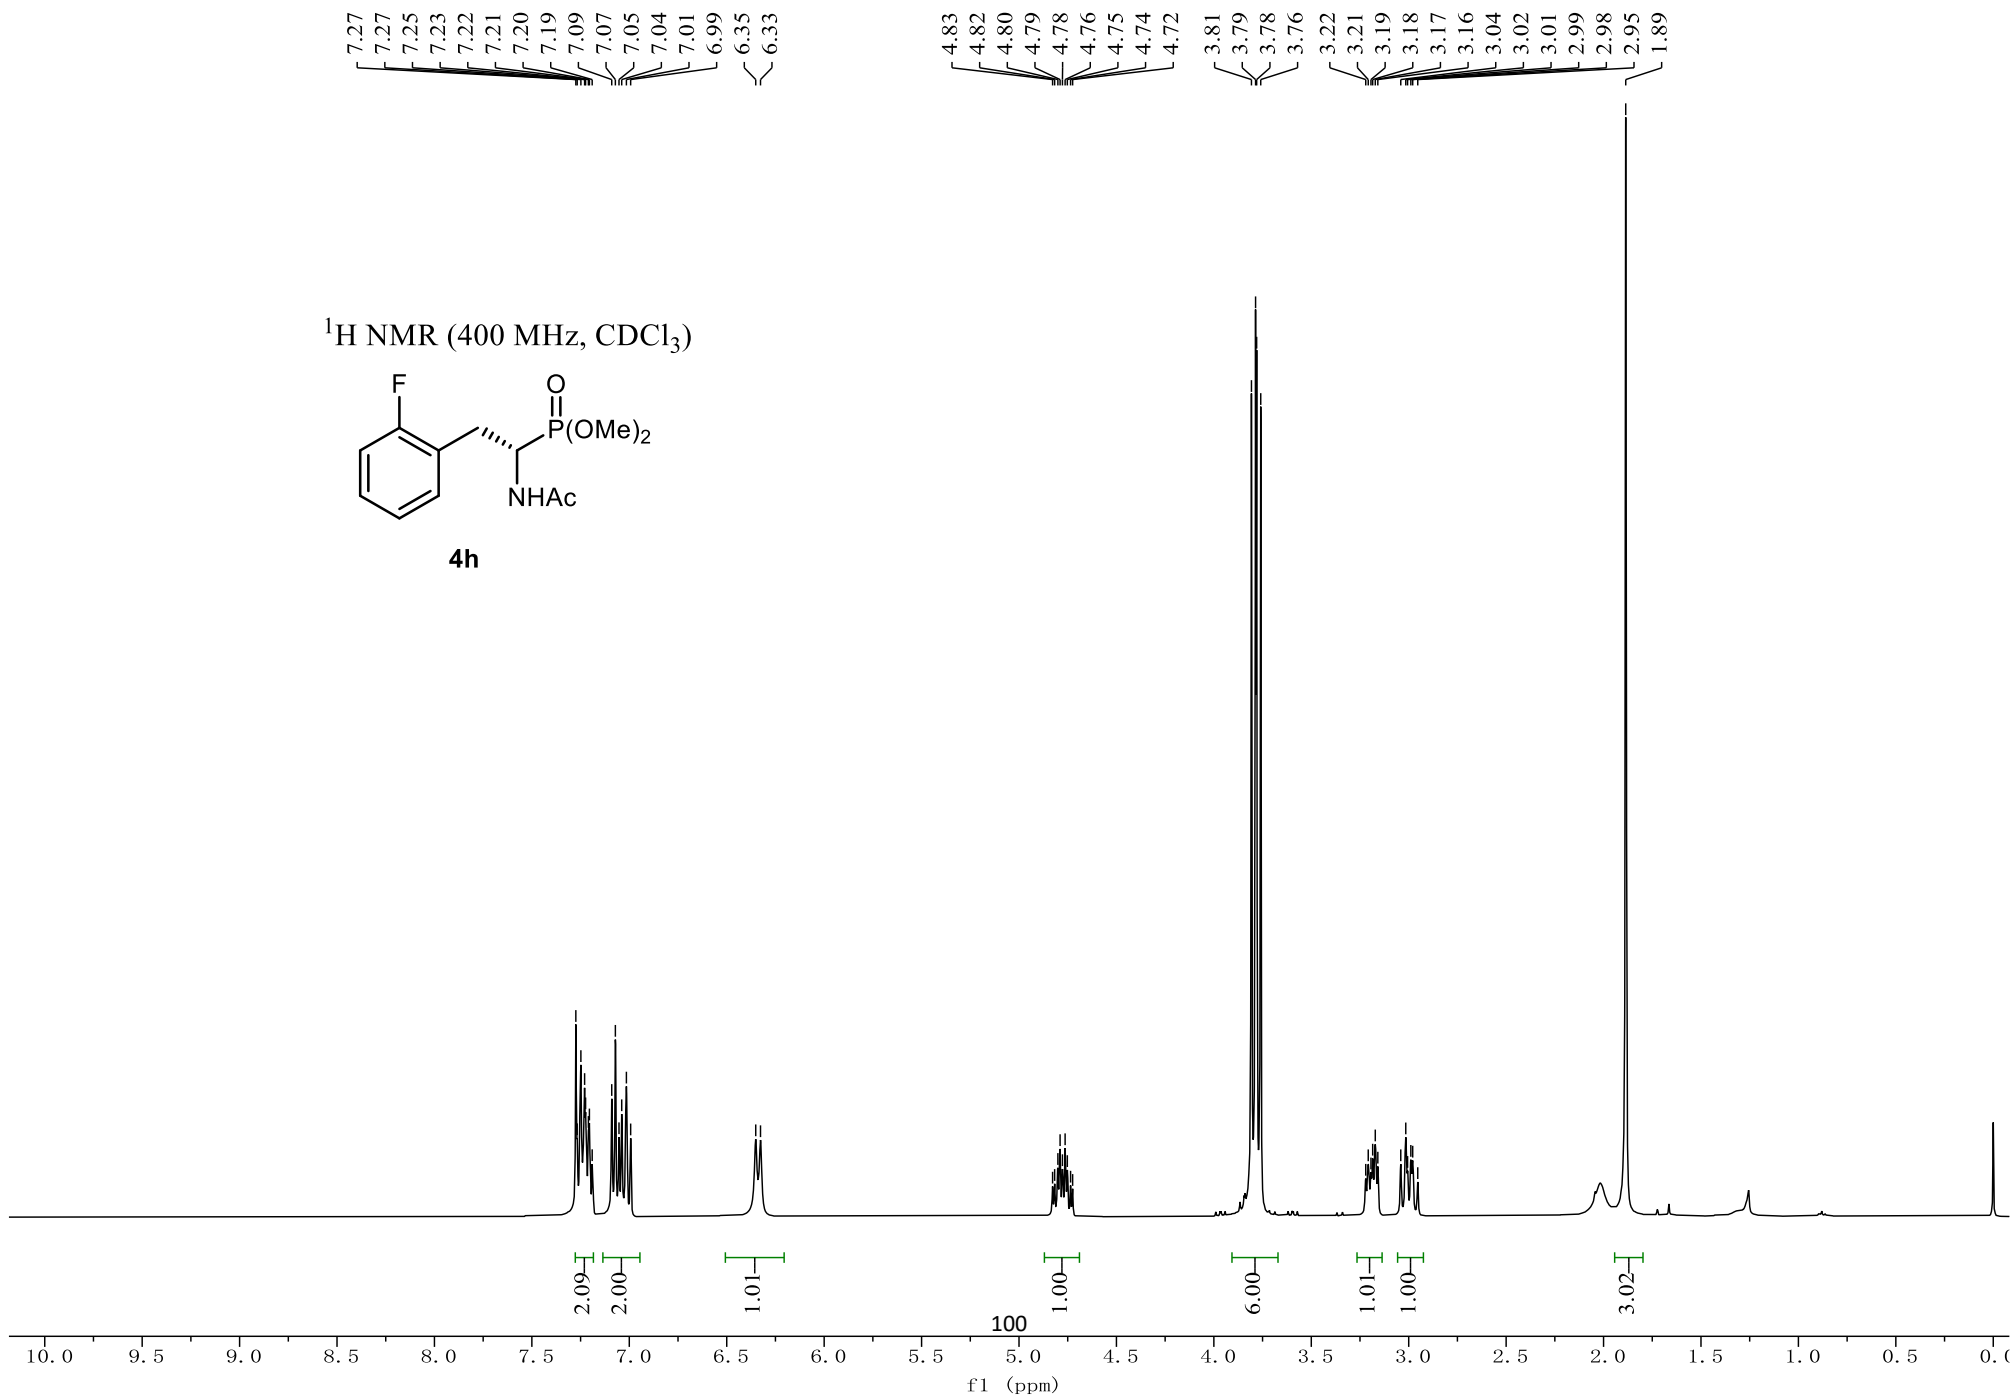

169.66  
169.61  
162.55  
160.12

131.31  
131.27  
128.88  
128.80  
124.21  
124.17  
123.81  
123.66  
123.51  
115.32  
115.10

53.53  
53.46  
53.07  
53.00  
45.90  
44.35

28.96  
28.94  
28.92  
28.90  
22.80

<sup>13</sup>C NMR (101 MHz, CDCl<sub>3</sub>)

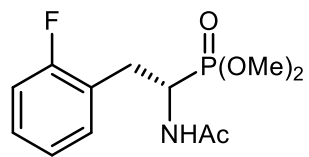

**4h**

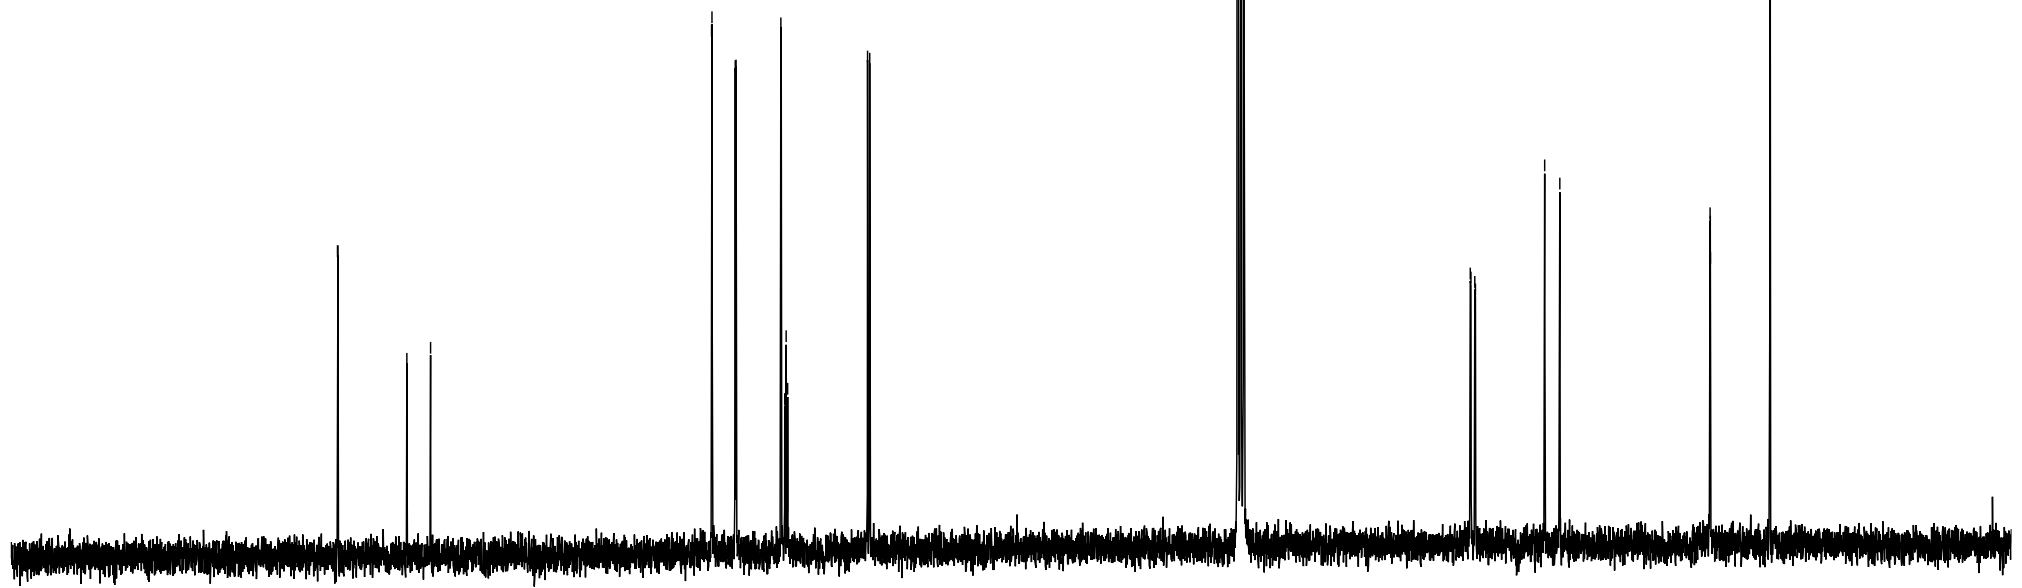

101

200 190 180 170 160 150 140 130 120 110 100 90 80 70 60 50 40 30 20 10 0  
f1 (ppm)

$^{31}\text{P}$  NMR (162 MHz,  $\text{CDCl}_3$ )

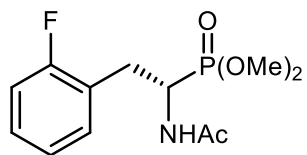

**4h**

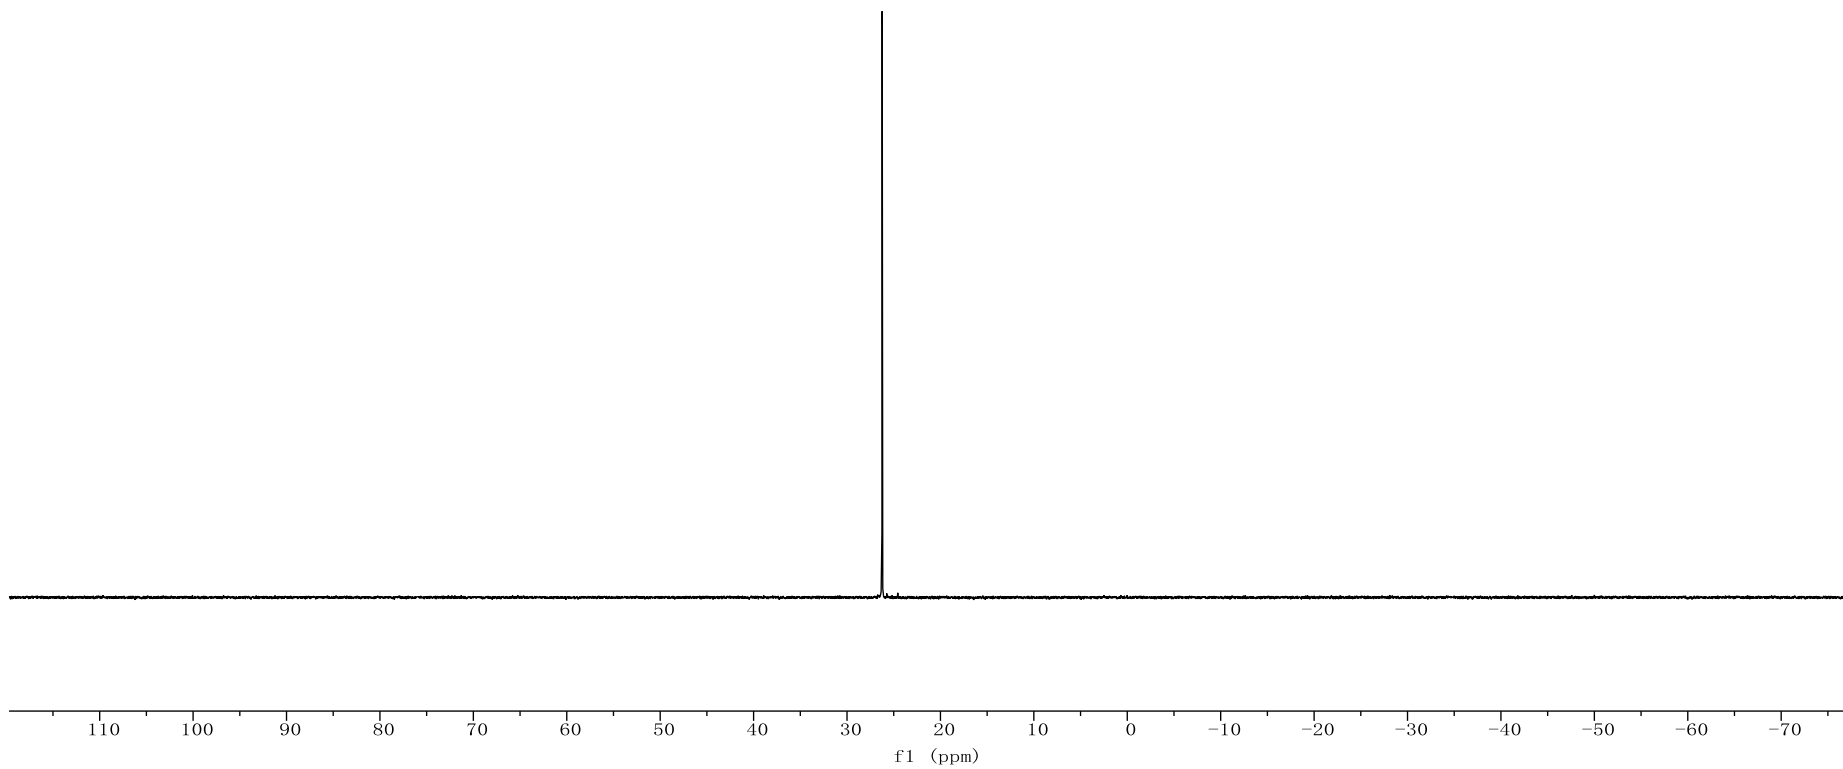

7.27  
7.26  
7.24  
7.24  
7.22  
7.03  
7.01  
6.98  
6.96  
6.95  
6.94  
6.92  
6.90  
6.90  
6.64  
6.62

4.82  
4.81  
4.80  
4.79  
4.77  
4.76  
4.75  
4.73  
4.72

3.79  
3.77  
3.76  
3.74  
3.22  
3.21  
3.20  
3.18  
3.17  
3.16  
3.15  
2.97  
2.94  
2.93  
2.91  
2.90  
2.88  
1.91  
1.91

$^1\text{H}$  NMR (400 MHz,  $\text{CDCl}_3$ )

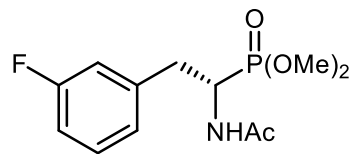

**4i**

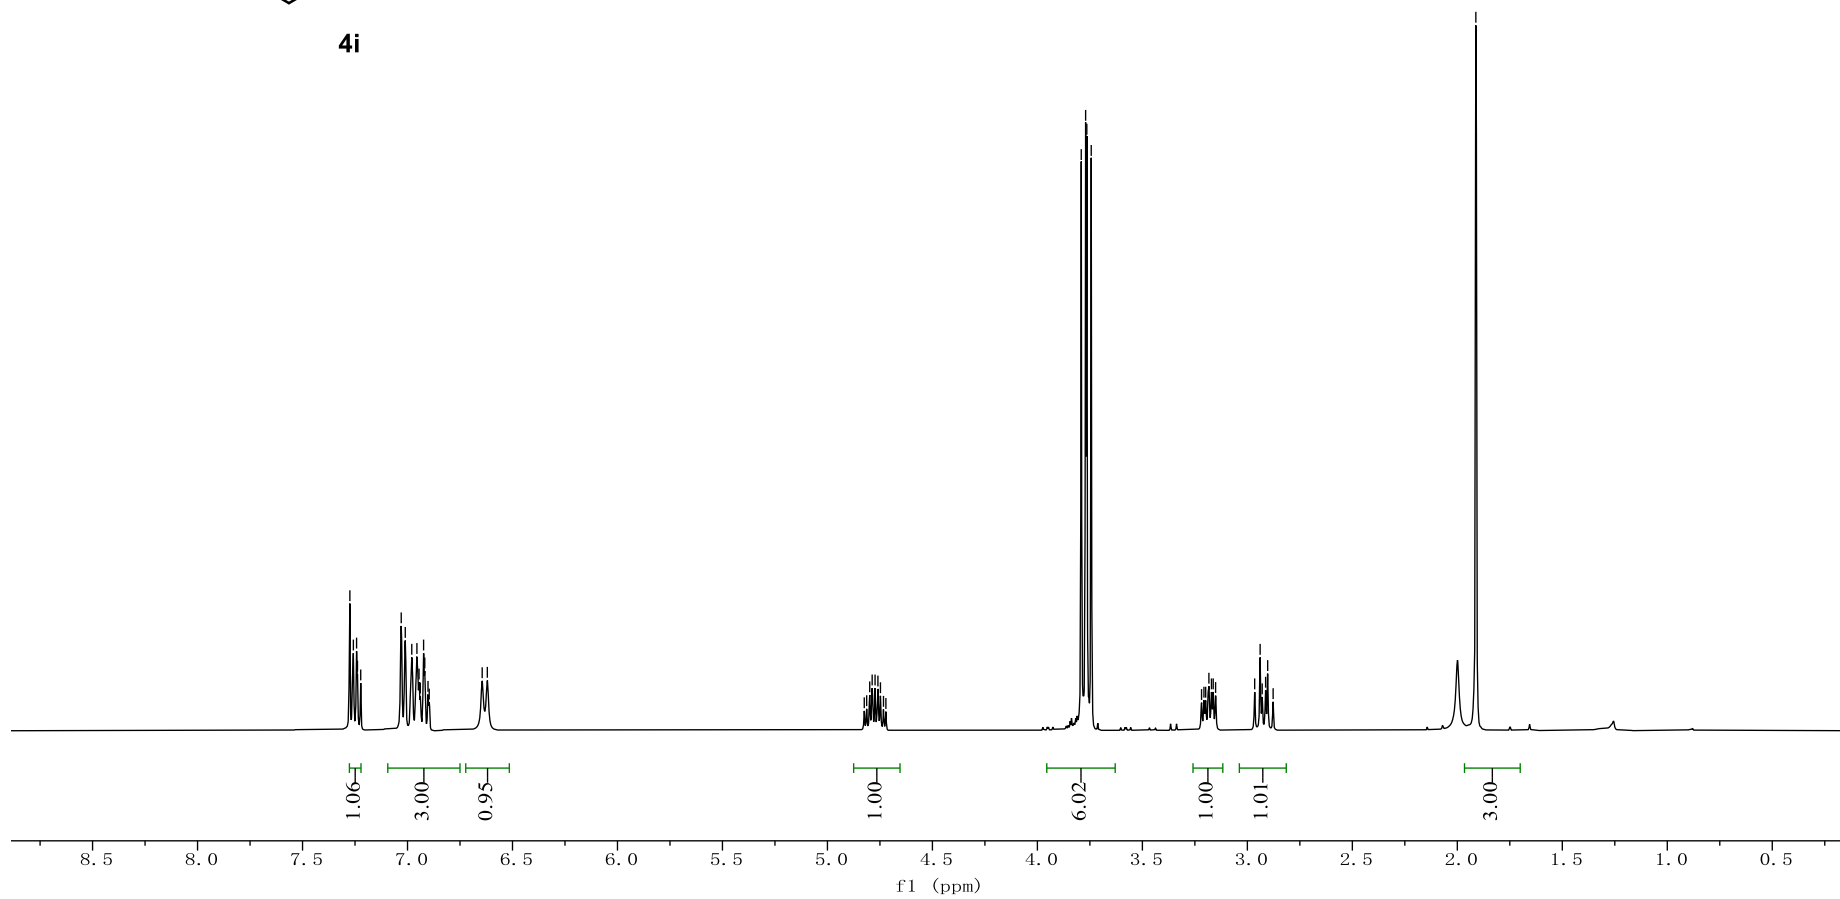



169.79  
169.74  
163.94  
161.50

139.19  
139.12  
139.05  
138.98  
129.95  
129.87  
124.72  
124.70  
116.29  
116.08  
113.93  
113.72

53.62  
53.55  
52.95  
52.88  
46.28  
44.72

35.26

22.78

<sup>13</sup>C NMR (101 MHz, CDCl<sub>3</sub>)

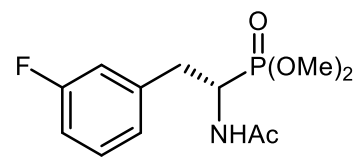

**4i**

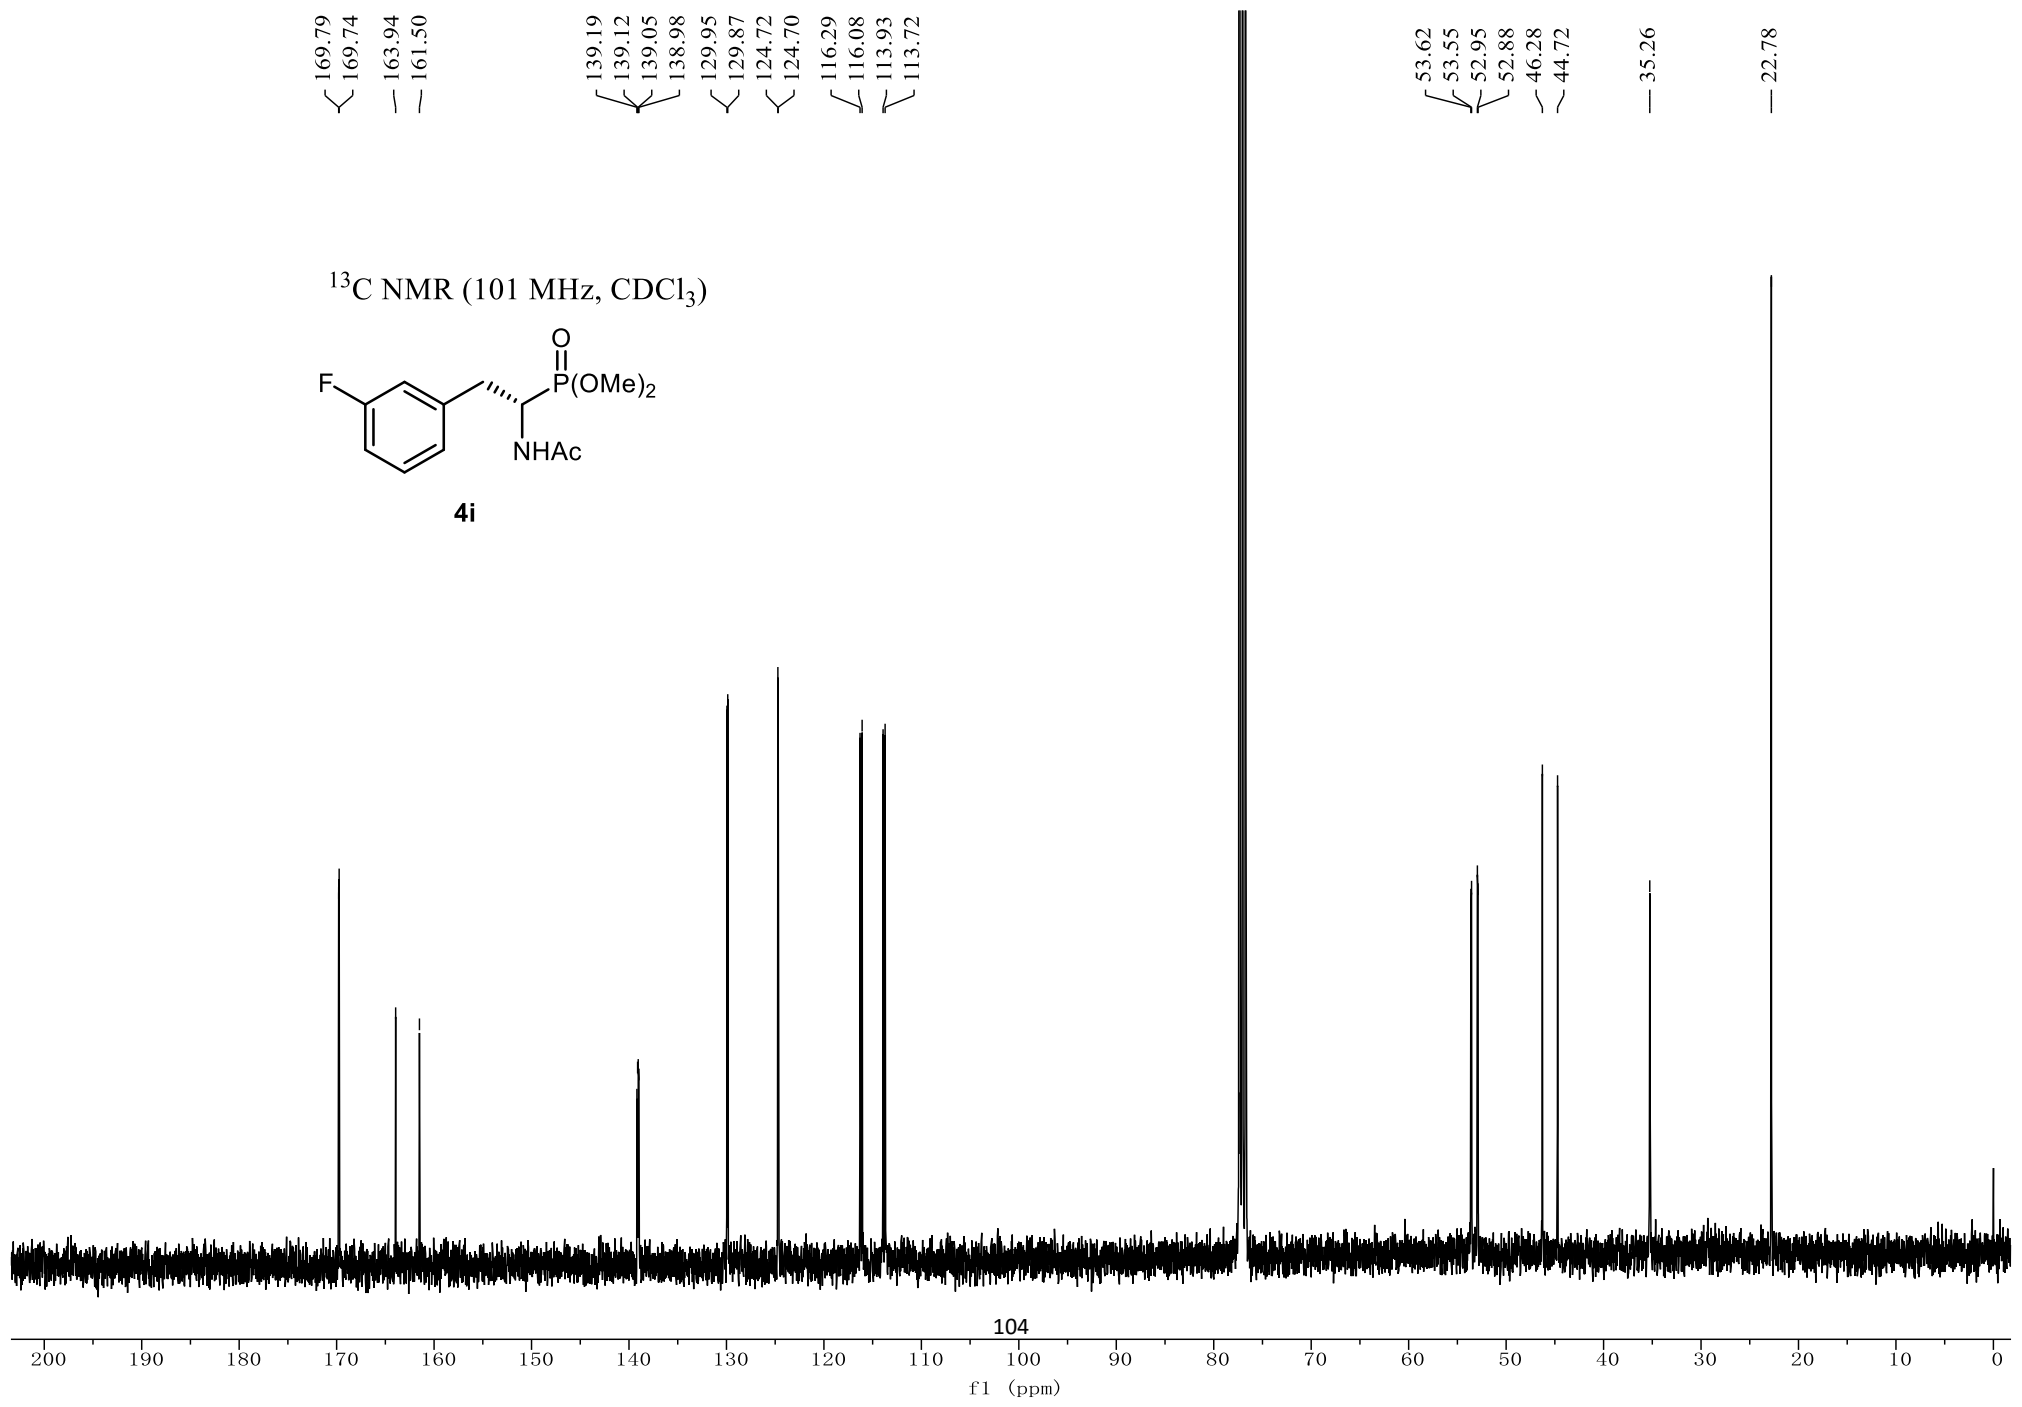

104

200 190 180 170 160 150 140 130 120 110 100 90 80 70 60 50 40 30 20 10 0

f1 (ppm)

$^{31}\text{P}$  NMR (162 MHz,  $\text{CDCl}_3$ )

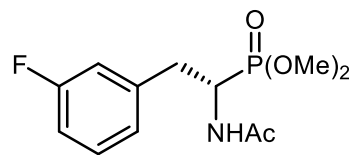

**4i**

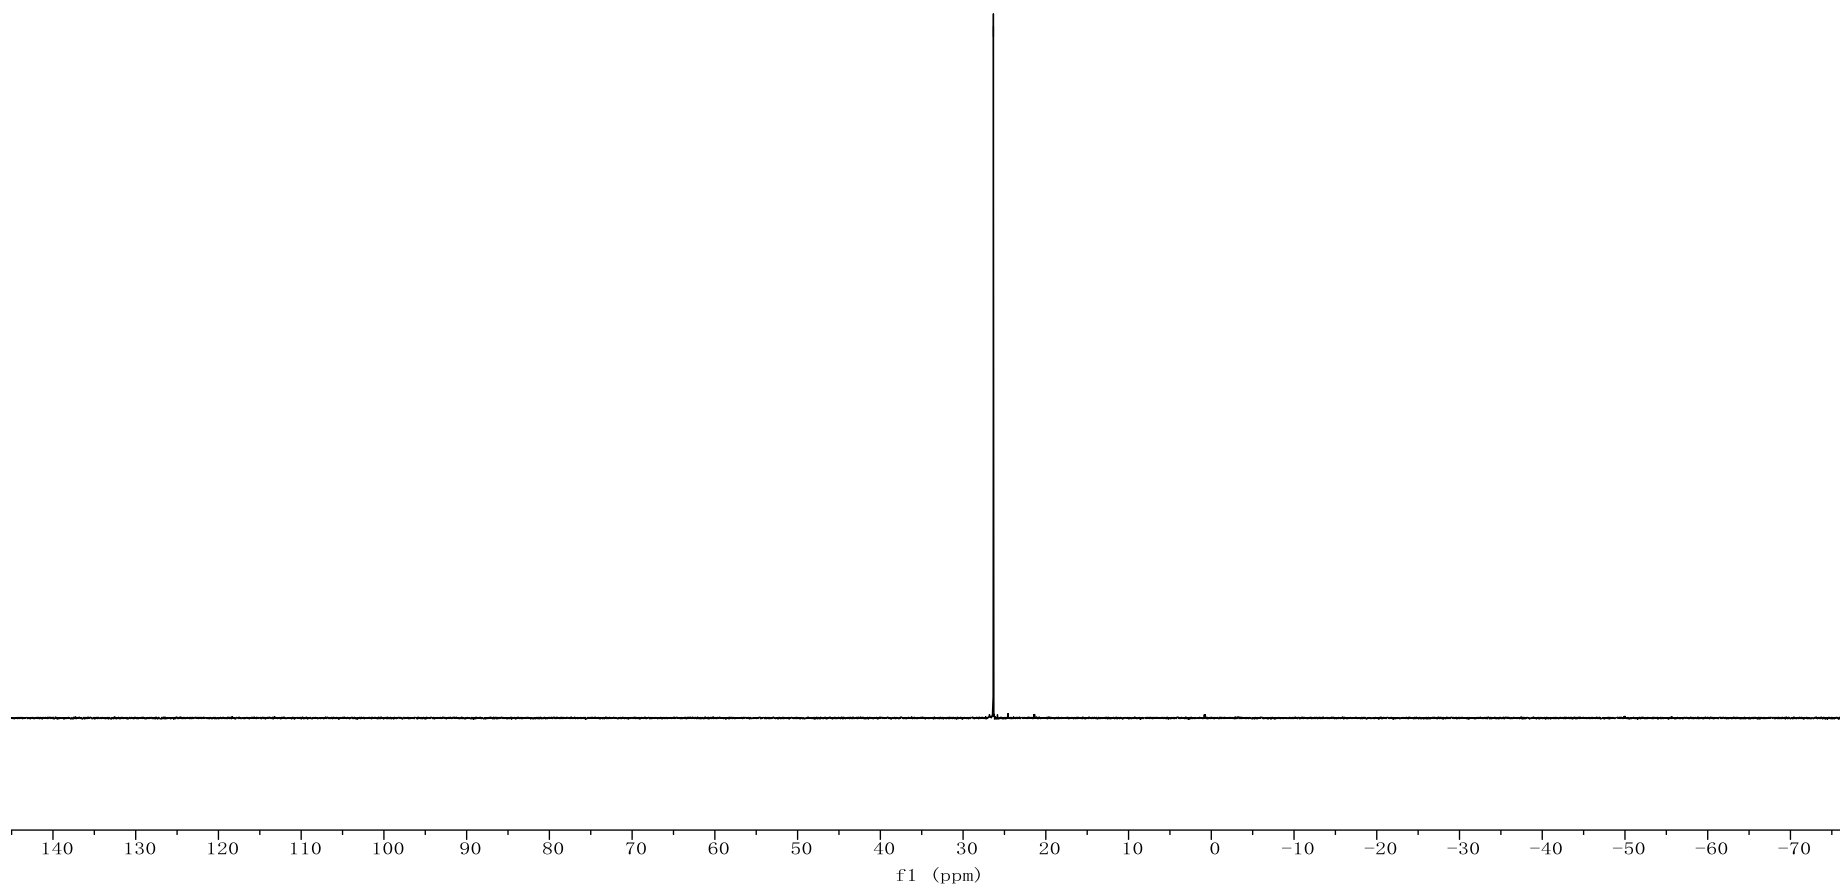

7.26  
7.26  
7.25  
7.25  
7.07  
7.07  
6.98  
6.97  
6.40  
6.38

4.84  
4.83  
4.82  
4.81  
4.79  
4.78  
4.77  
4.75  
4.74

3.77  
3.76  
3.74  
3.74  
3.22  
3.21  
3.20  
3.19  
3.18  
3.17  
3.15  
3.05  
3.02  
3.01  
3.00  
2.99  
2.96  
1.93  
1.93

$^1\text{H}$  NMR (400 MHz,  $\text{CDCl}_3$ )

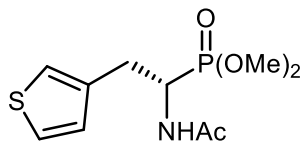

4j

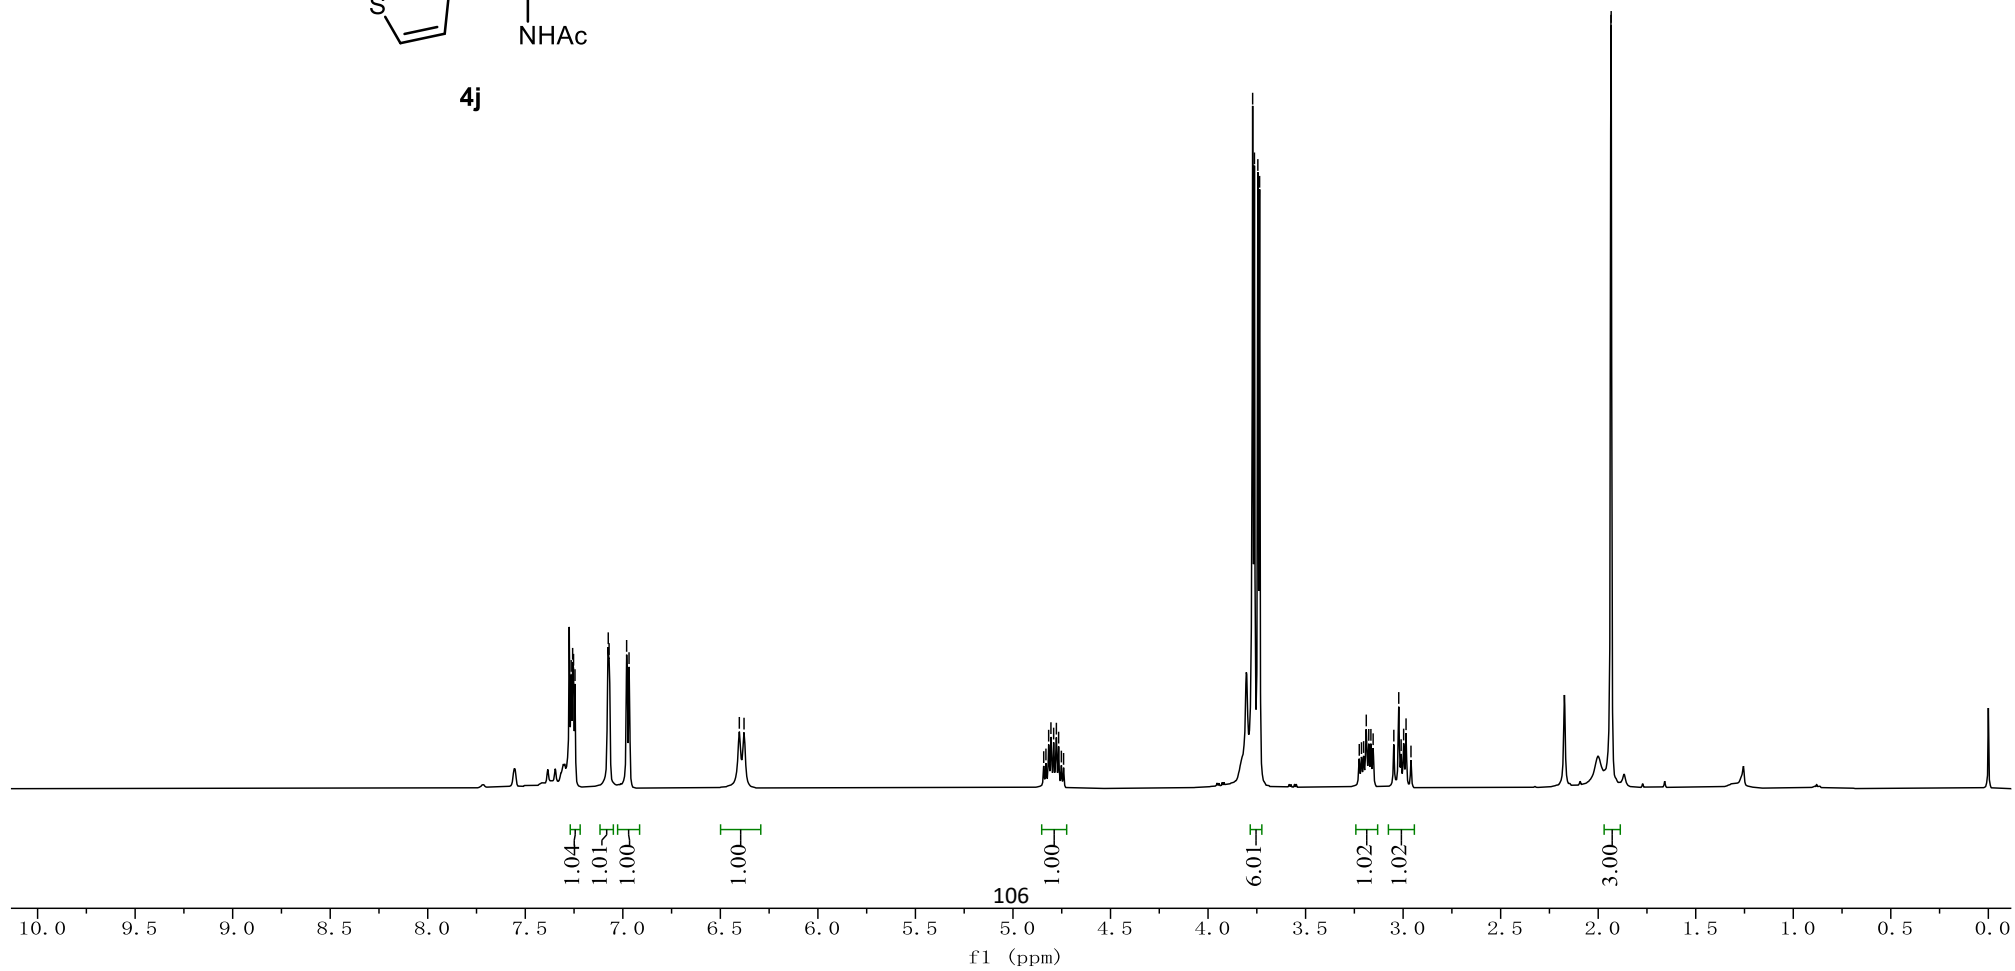

$^{13}\text{C}$  NMR (101 MHz,  $\text{CDCl}_3$ )

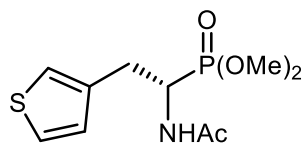

4j

169.79  
169.74

136.68  
136.54

128.25  
125.78  
122.29

53.49  
53.42  
52.97  
52.91  
45.86  
44.30

30.18  
30.14  
22.93

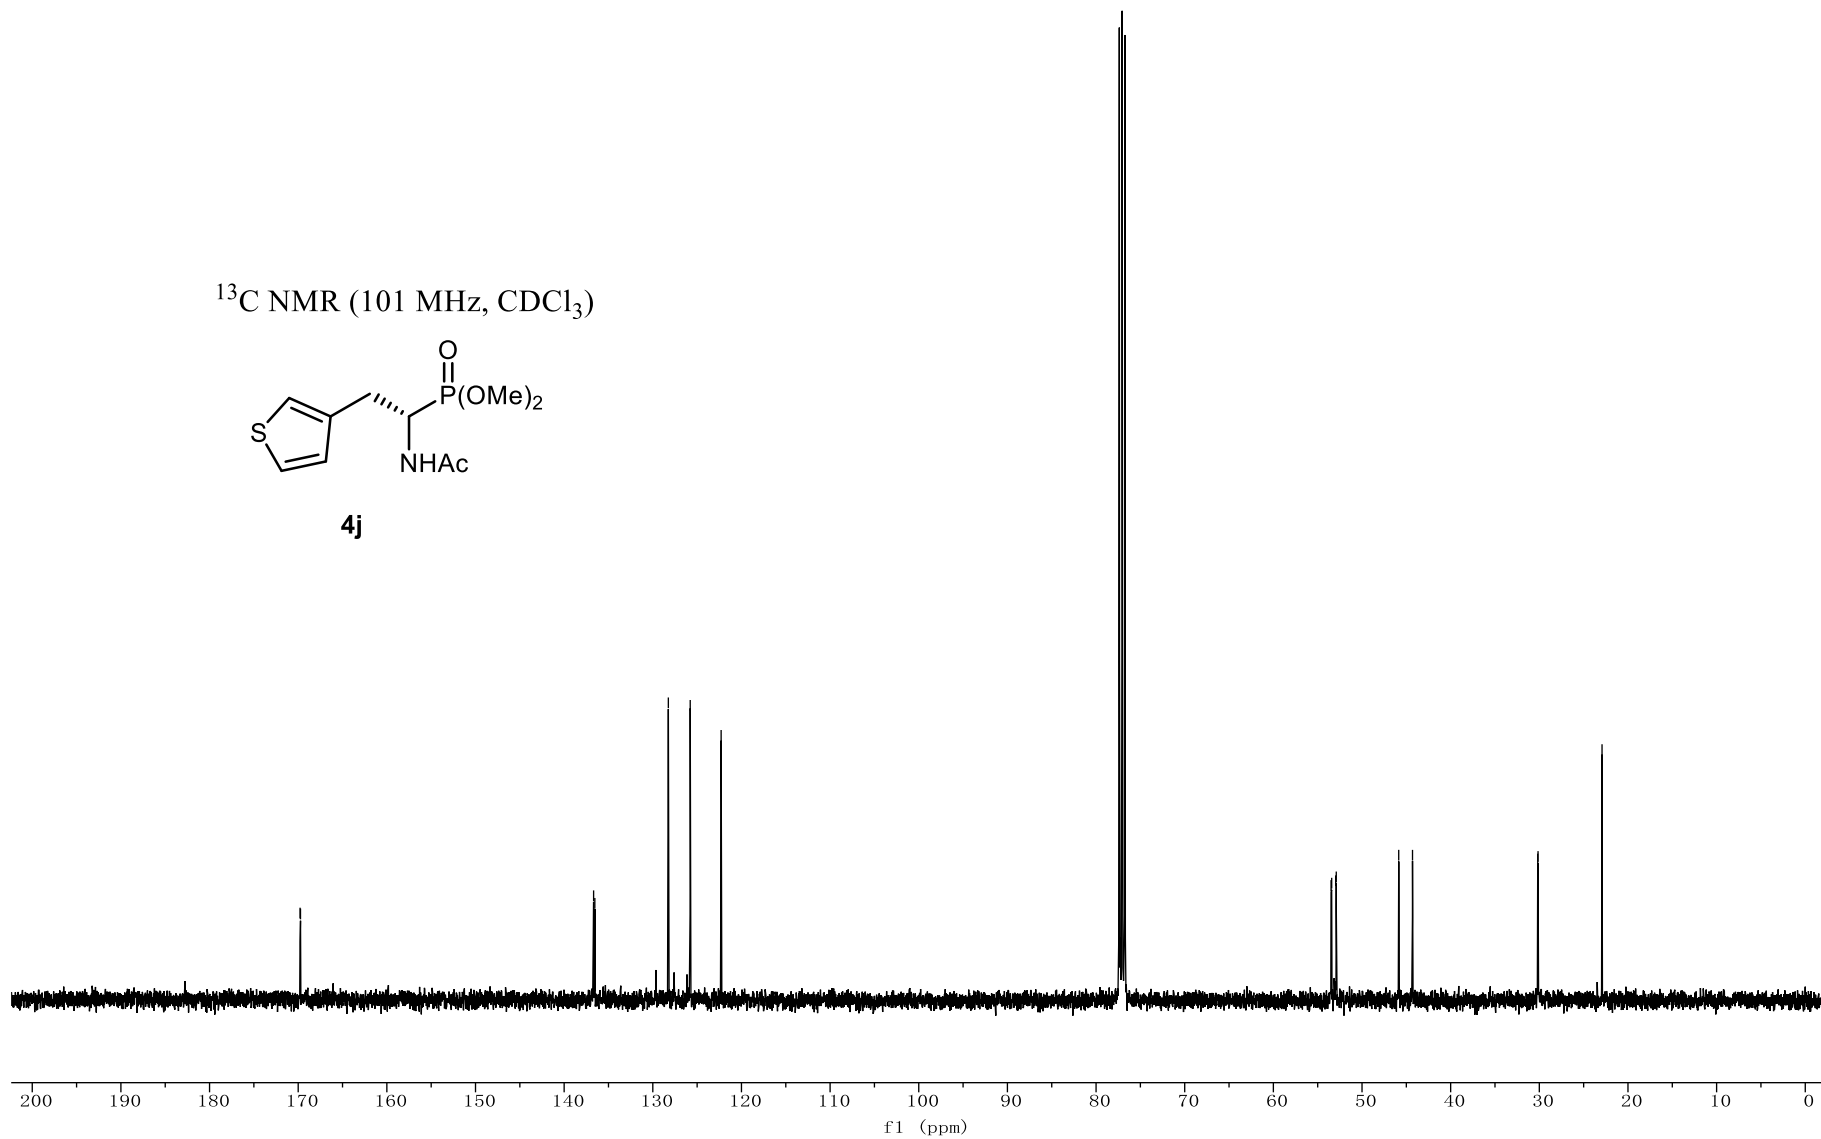

$^{31}\text{P}$  NMR (162 MHz,  $\text{CDCl}_3$ )

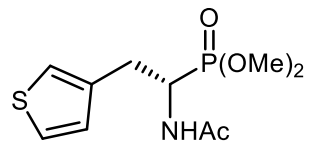

4j

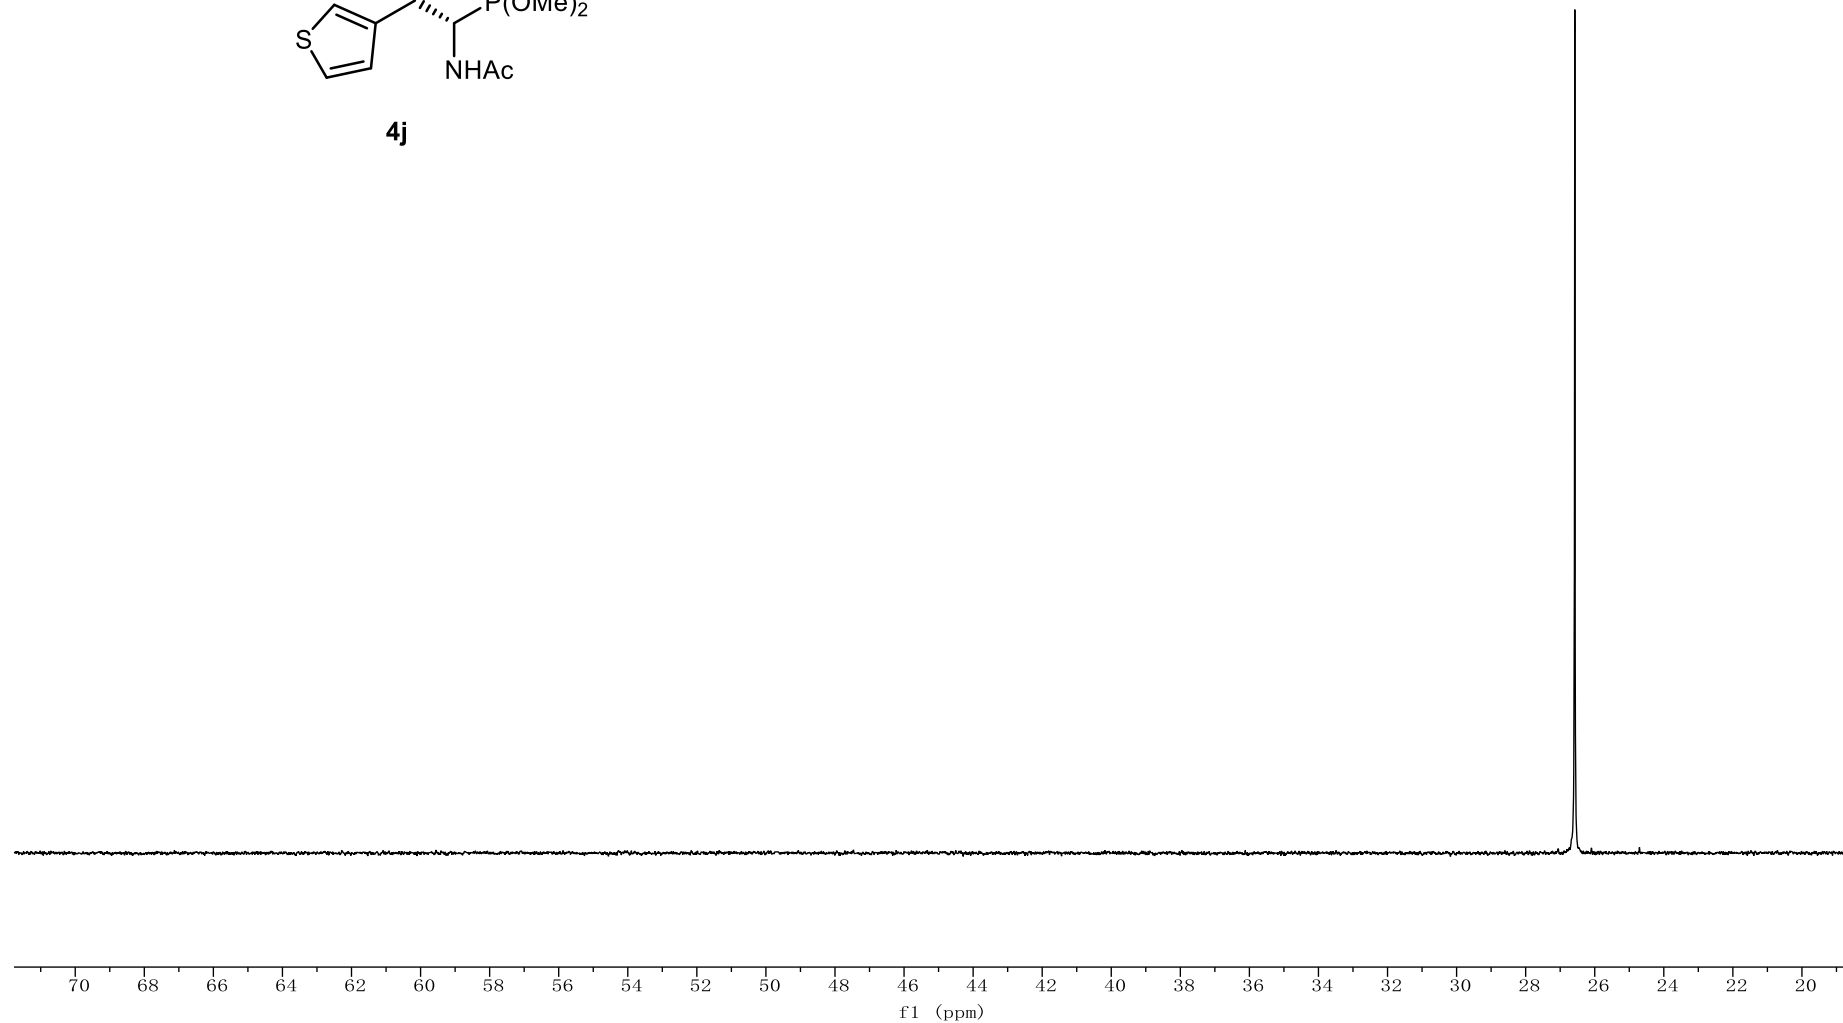

$^1\text{H}$  NMR (400 MHz,  $\text{CDCl}_3$ )

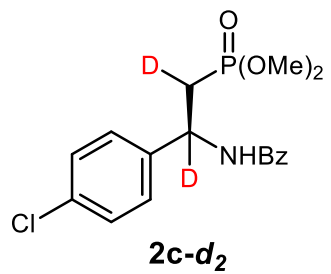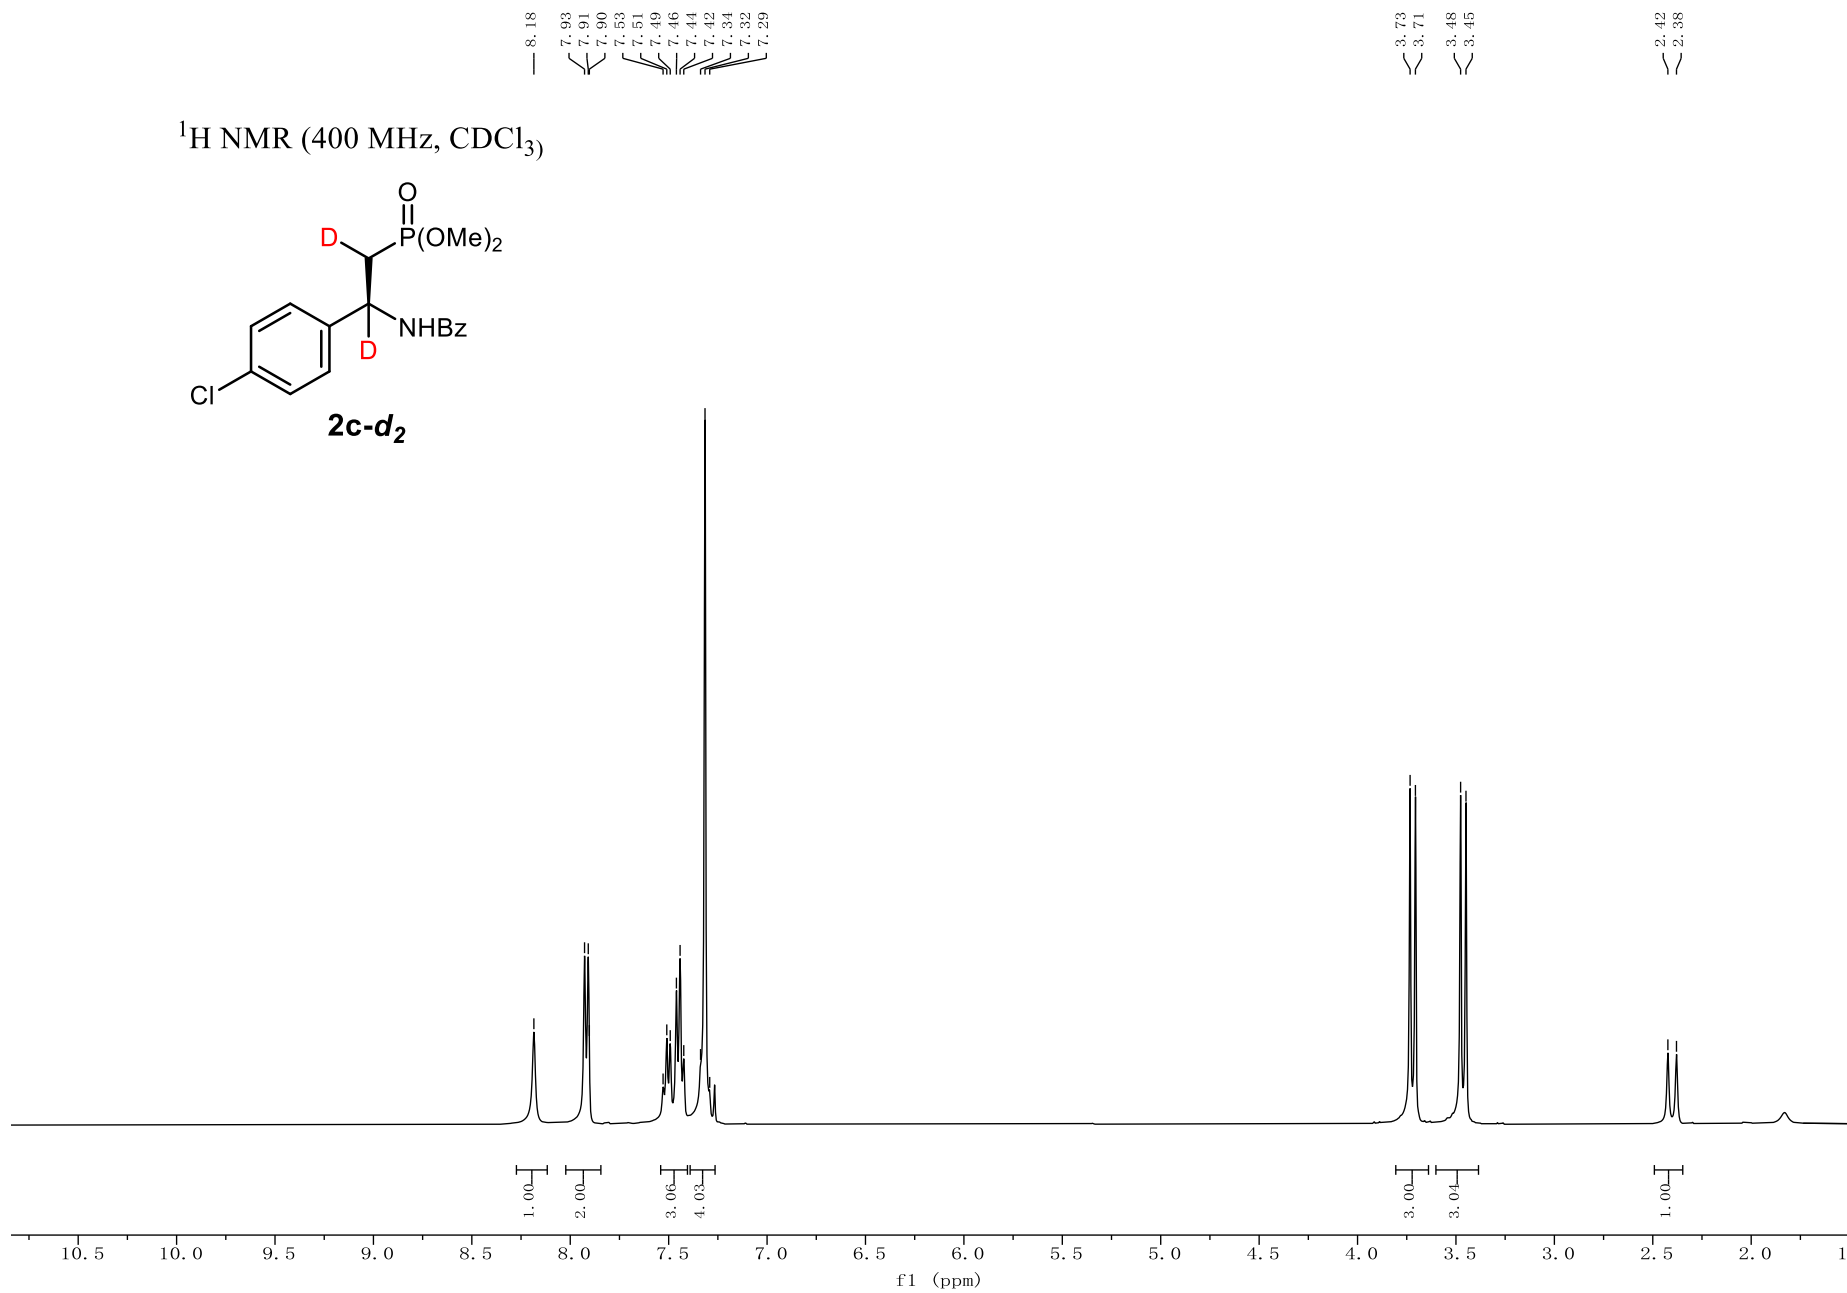

8.92  
8.91

7.91  
7.89  
7.58  
7.56  
7.54  
7.51  
7.49  
7.48  
7.43  
7.41  
7.35  
7.34  
7.32  
7.27  
7.26  
7.24  
7.22

5.37  
5.35  
5.32

2.41  
2.07  
2.05  
2.03  
2.01  
1.97

$^1\text{H}$  NMR (400 MHz,  $\text{DMSO-}d_6$ )

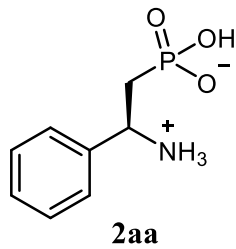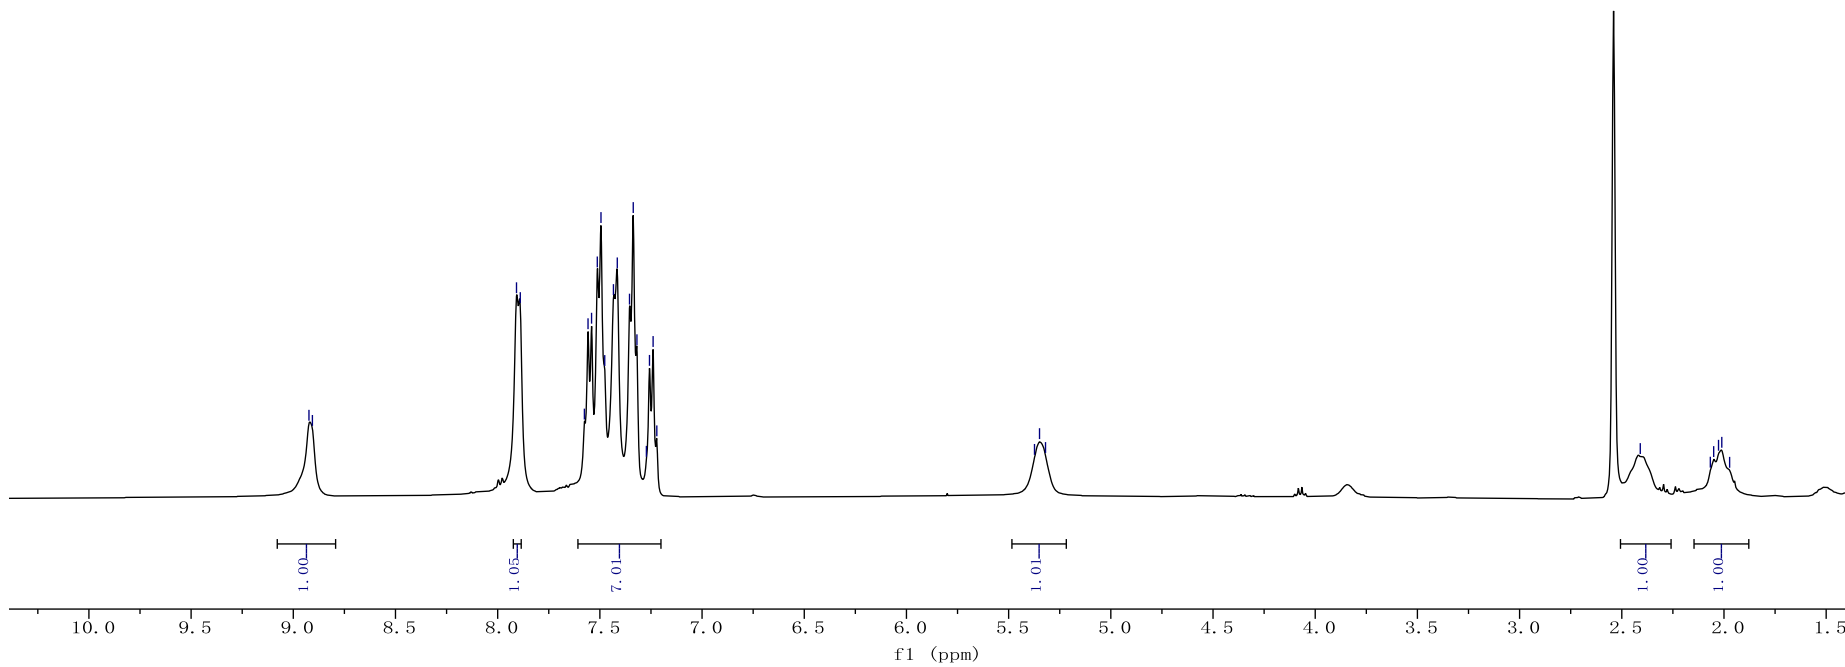

$^{31}\text{P}$  NMR (162 MHz,  $\text{DMSO-}d_6$ )

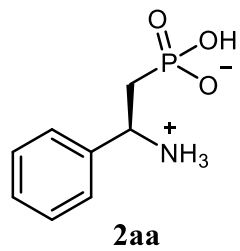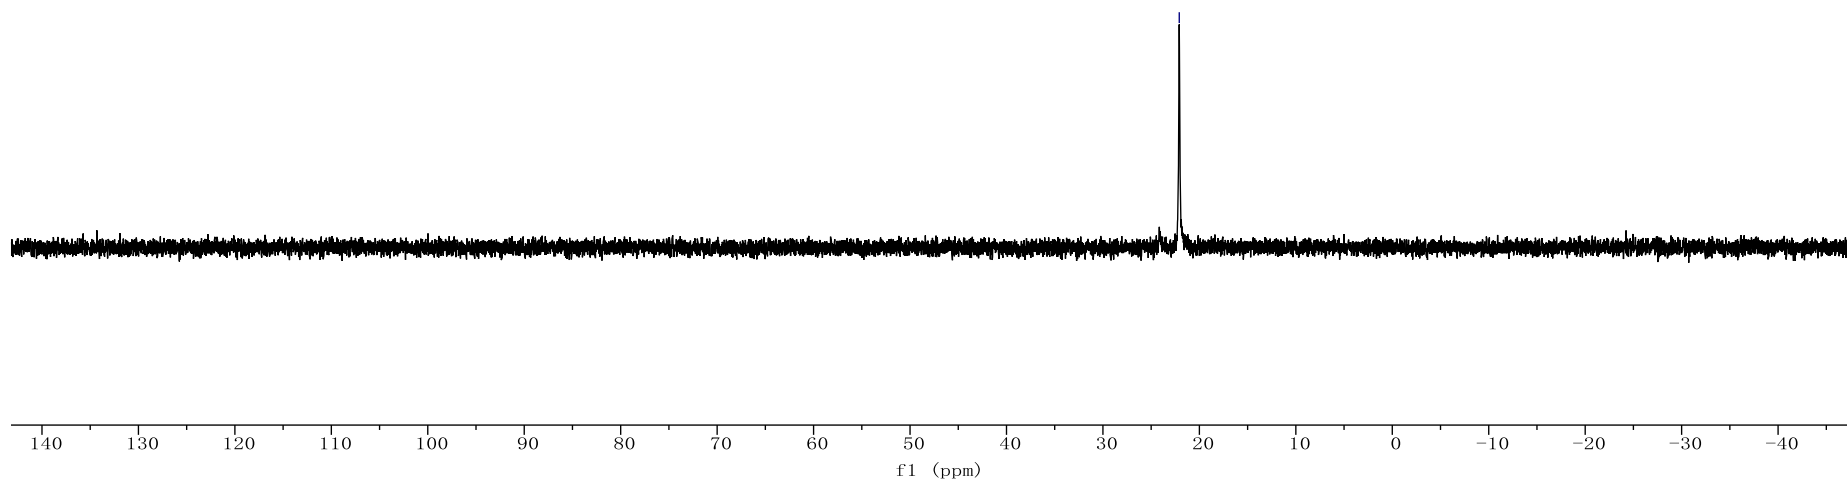



$^1\text{H}$  NMR (400 MHz, Deuterium Oxide with 1 drop 30%NaOD)

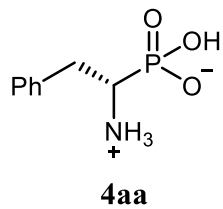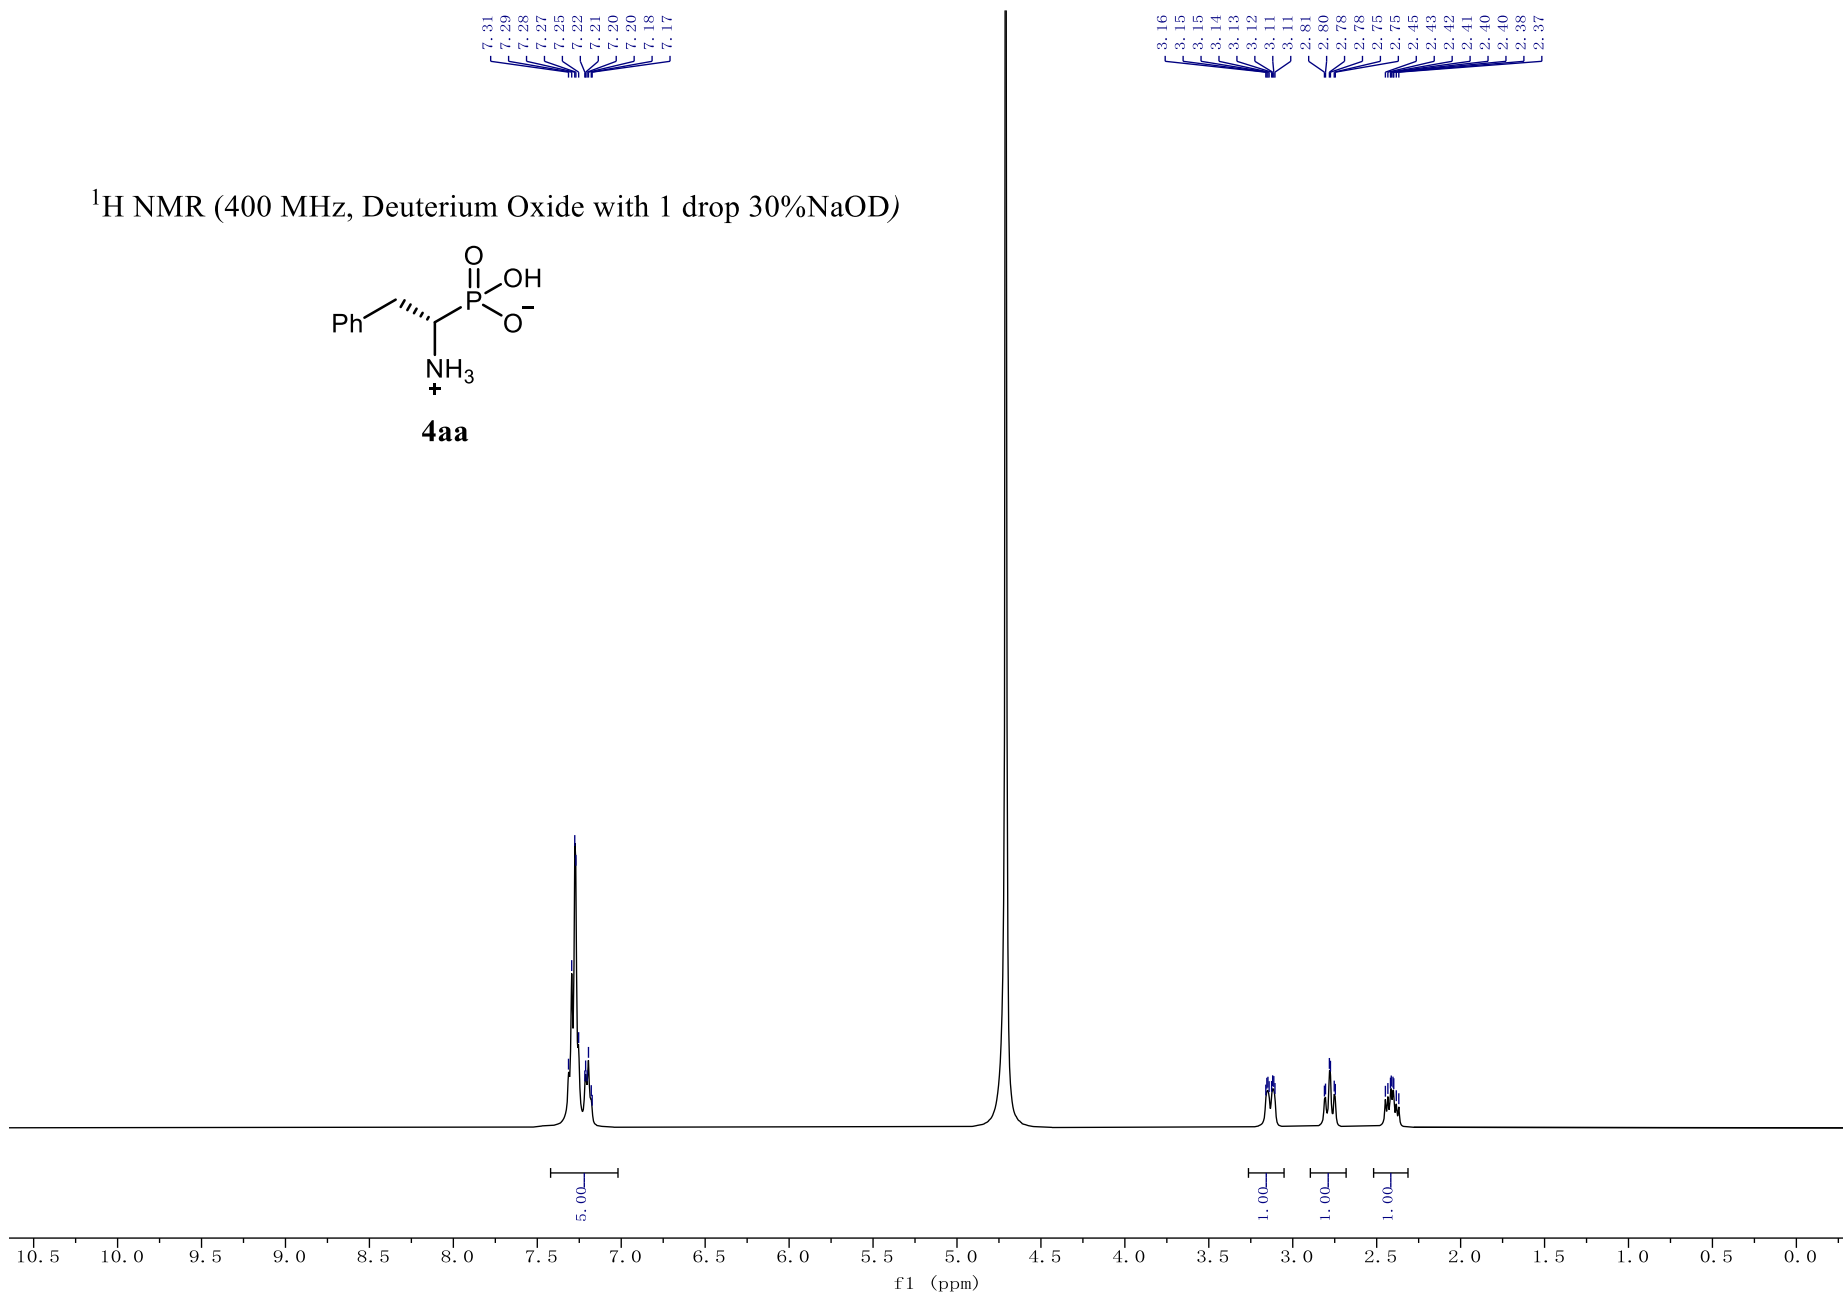

141.24  
141.09

129.25  
128.49  
126.10

52.82  
51.45

38.09

$^{13}\text{C}$  NMR (101 MHz, Deuterium Oxide with 1 drop 30%NaOD)

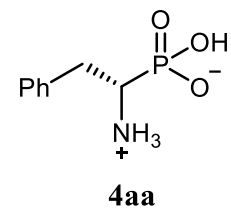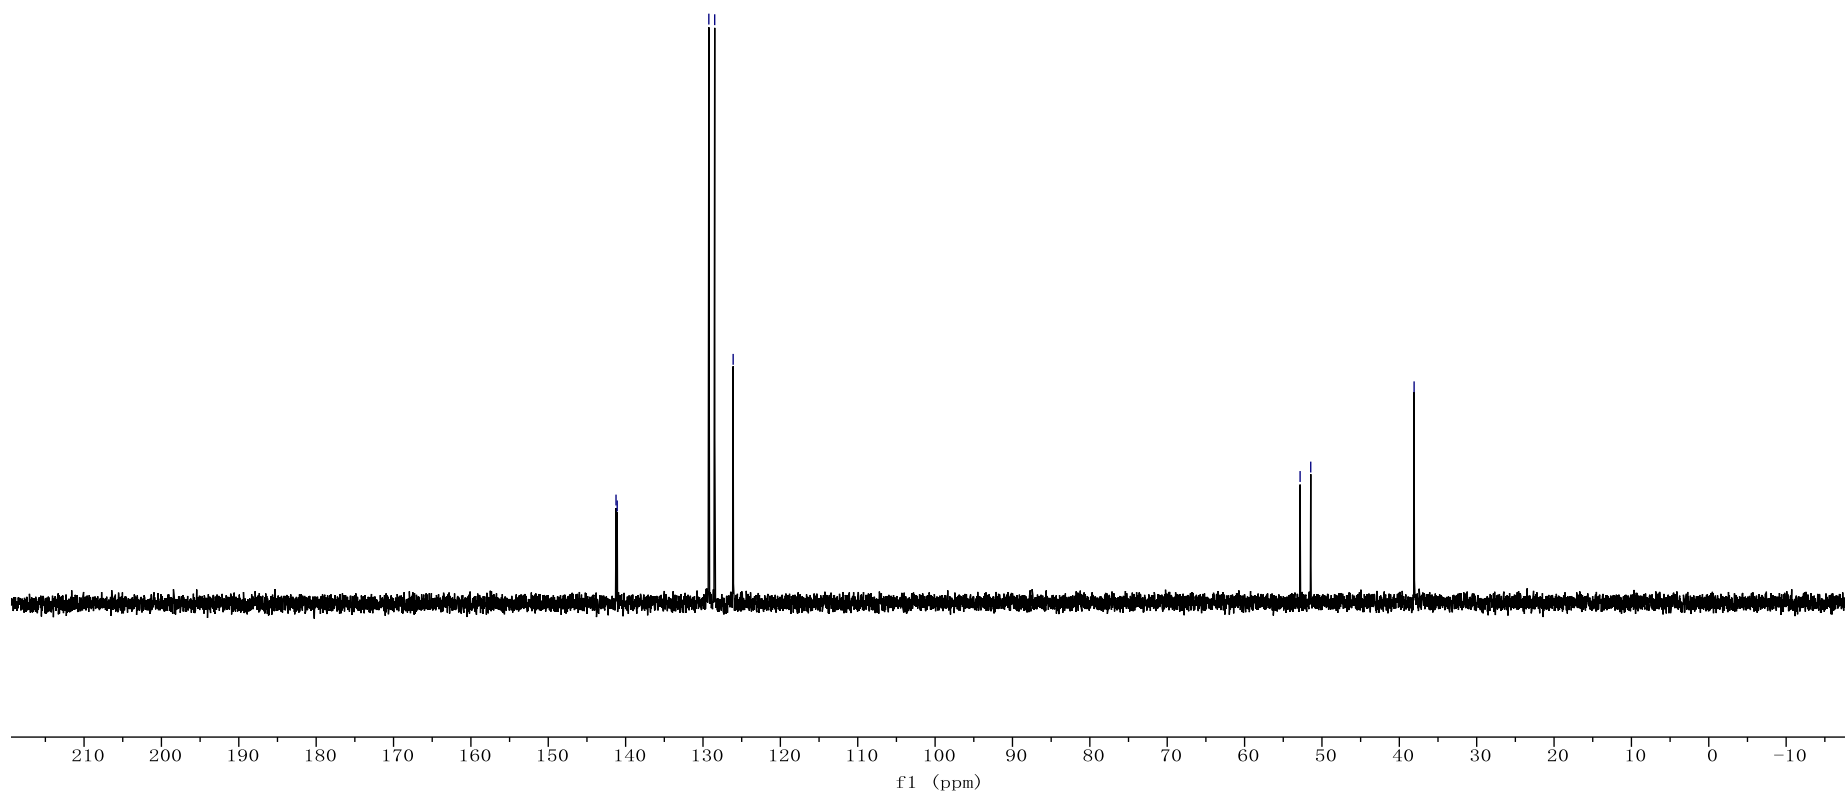

$^{31}\text{P}$  NMR (162 MHz, Deuterium Oxide with 1 drop 30%NaOD)

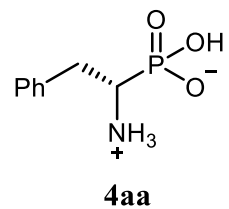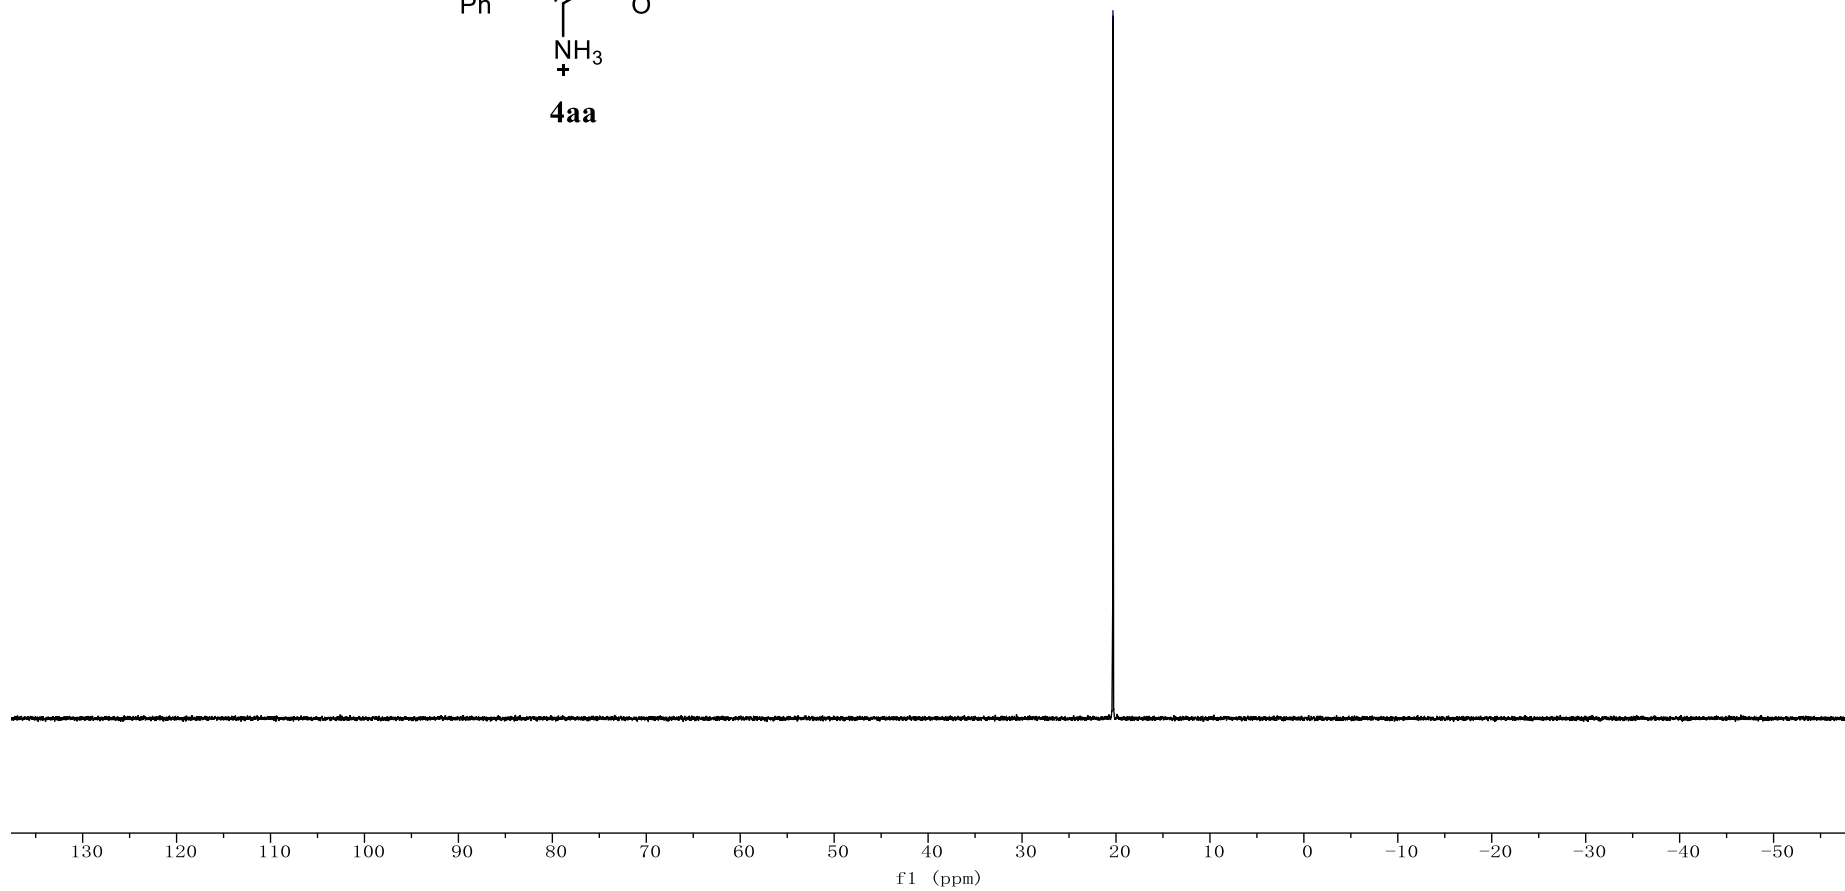

Supplement: d2ob01419j2.pdf [file d2ob01419j2.pdf]
