# Supplementary figures and images for: Rh-catalyzed asymmetric hydrogenation of α- and β-enamido phosphonates: highly enantioselective access to amino phosphonic acids
Source: Royal Society of Chemistry journal article supplement (doi:10.1039/d2ob01419j), 2022-01-01

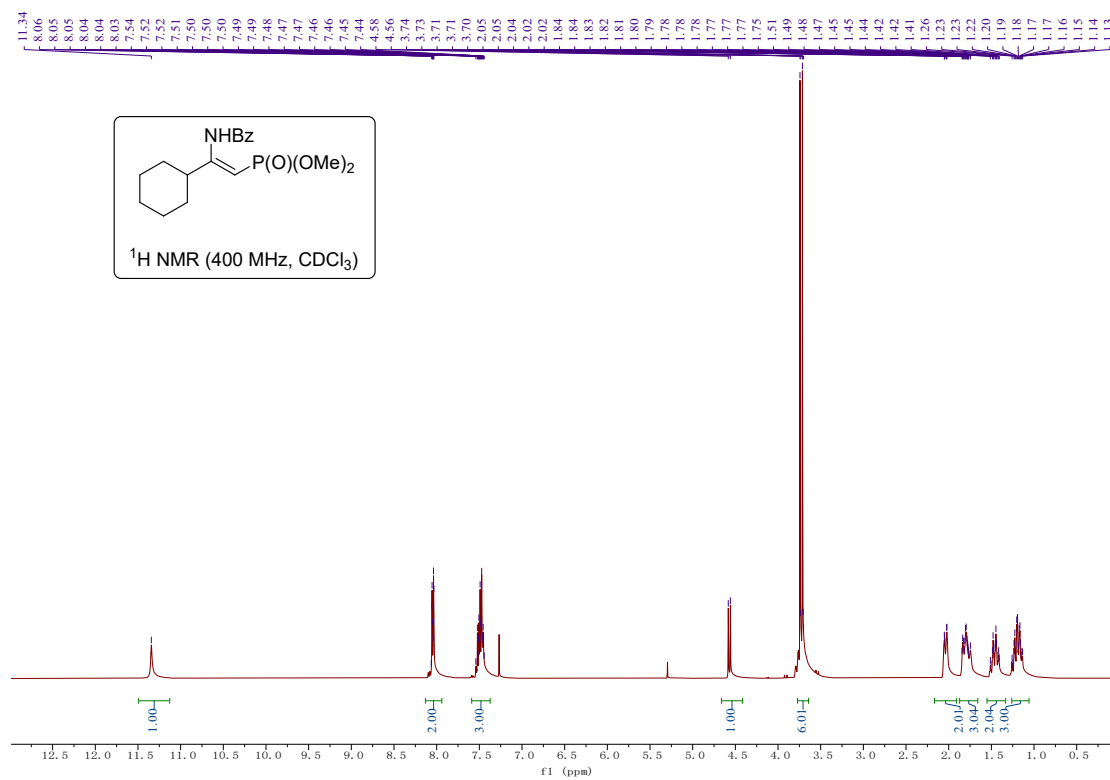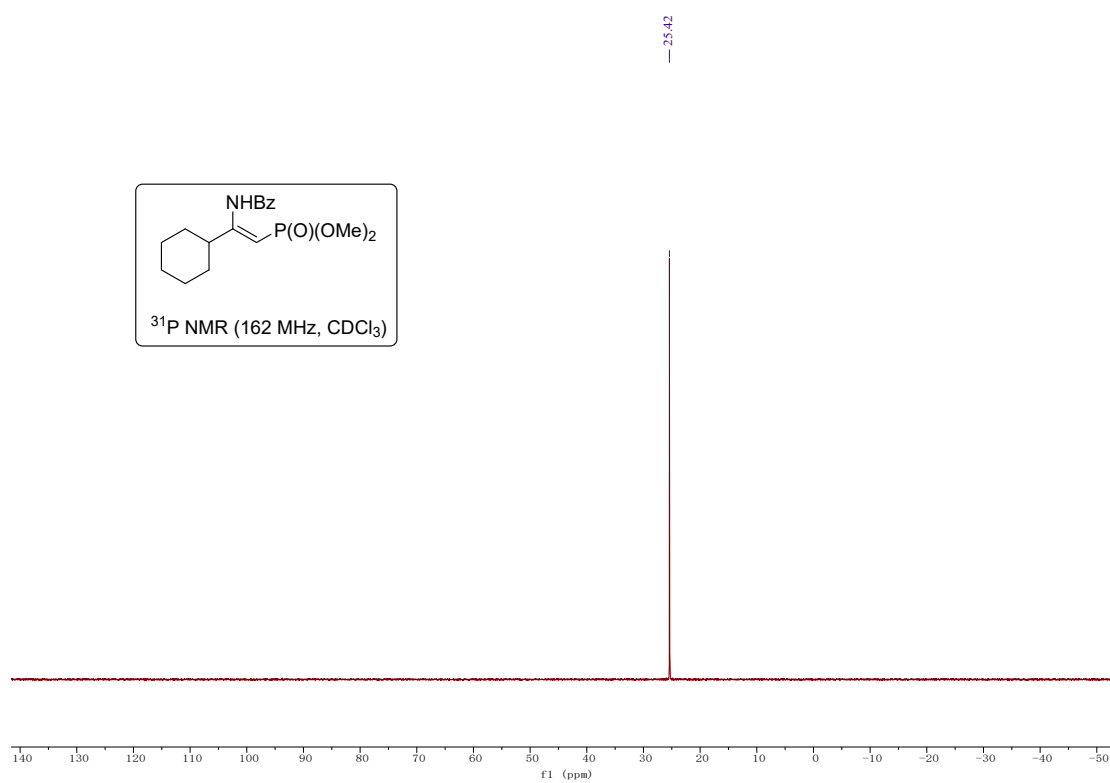

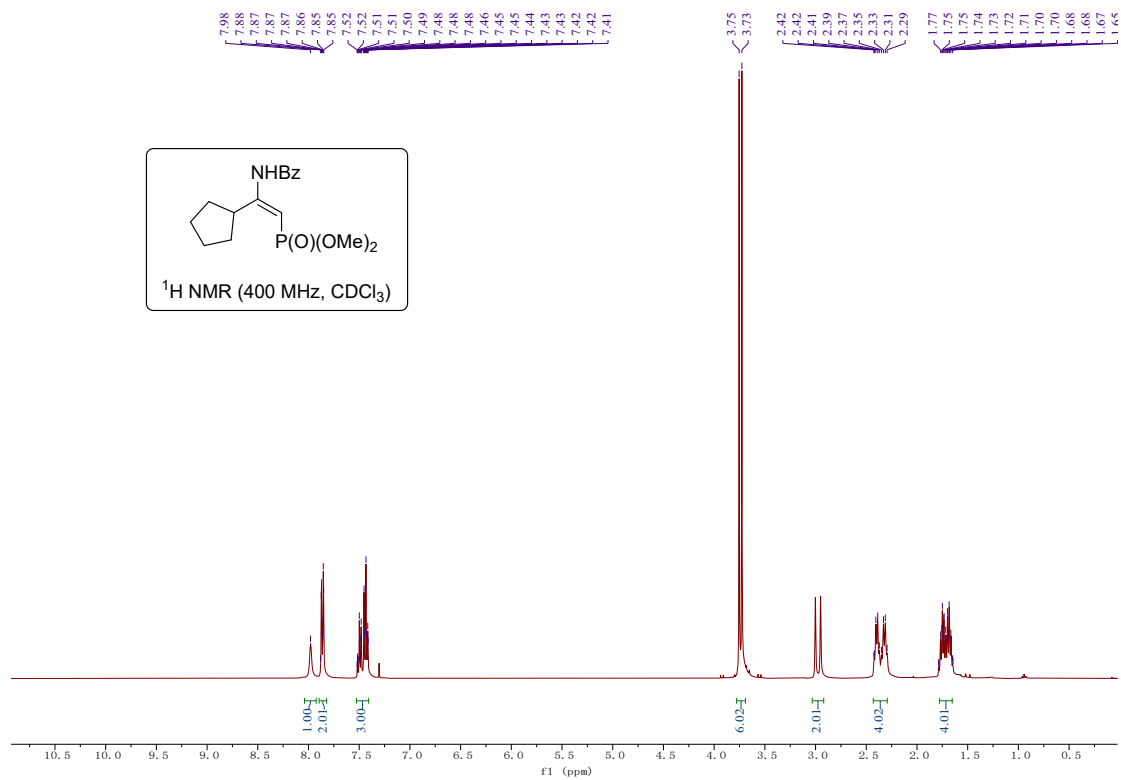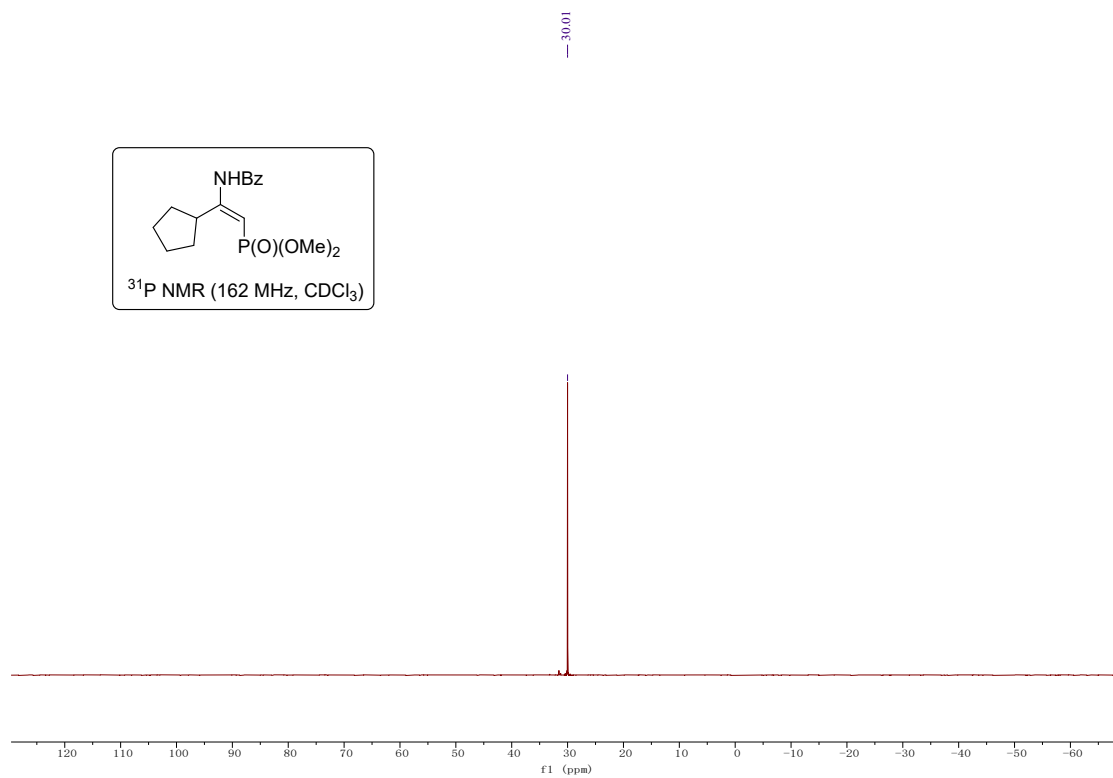

Supplement: d2ob01419j1.pdf [file d2ob01419j1.pdf]
